# Supplementary material for: High variability of perezone content in rhizomes of Acourtia cordata wild plants, environmental factors related, and proteomic analysis
Source: PeerJ journal article supplement (doi:10.7717/peerj.16136), 2023-11-15
Supplement: Figure_S1.pdf [file Figure_S1.pdf]

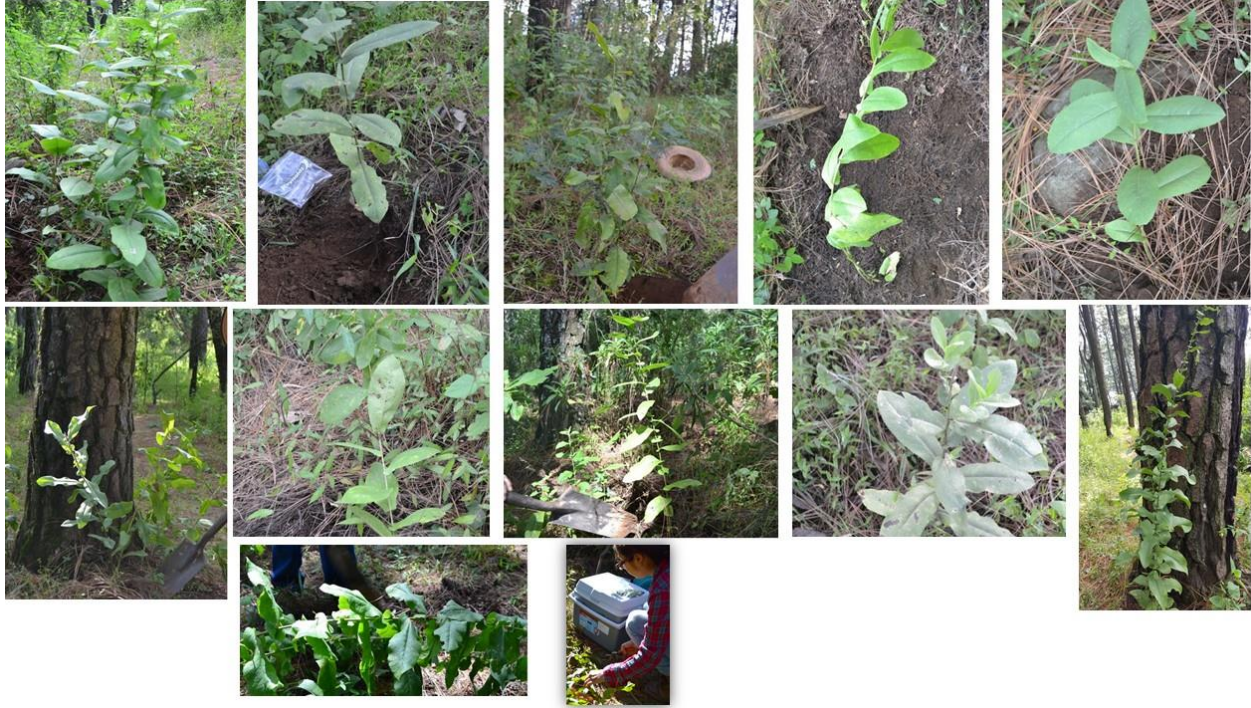

**Figure S1.** Rhizomes of *Acourtia cordata* wild plants growing in *Quercus-Pinus* forest, were collected at three localities.
