# Supplementary material for: High variability of perezone content in rhizomes of Acourtia cordata wild plants, environmental factors related, and proteomic analysis
Source: PeerJ journal article supplement (doi:10.7717/peerj.16136), 2023-11-15
Supplement: Figure_S2.pdf [file Figure_S2.pdf]

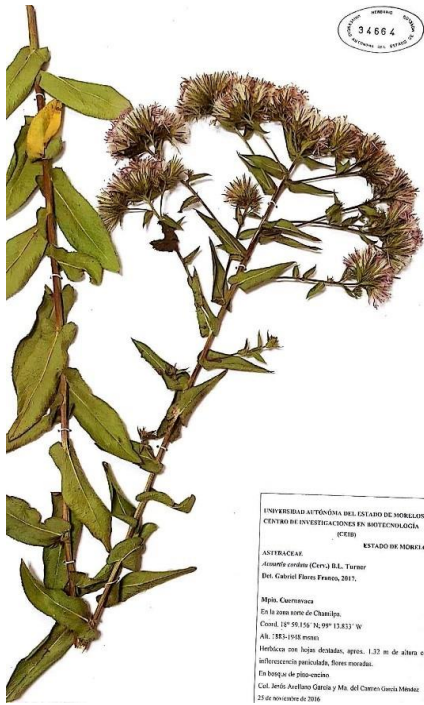

34664

UNIVERSIDAD AUTÓNOMA DEL ESTADO DE MORELOS  
CENTRO DE INVESTIGACIONES EN BIOTECNOLOGÍA  
(CIBIO) ESTADO DE MORELOS

ASTERACEAE  
Asensio-Jurado (Cruz) H.L. Turner  
Det. Gabriel Flores Franco, 2017.

Méjico, Cuernavaca  
En la zona norte de Chavilco.  
Coord. 19° 55' 15" N, 99° 12' 13" W  
Alt. 1885-1958 msnm.  
Herbívora con hojas dentadas, apices 1.32 m de altura con  
inflorescencia paniculada, flores moradas.  
En bosque de pinos-encinos.  
Ced. Jesús Arellano García y Ma. del Carmen García Méndez  
25 de noviembre de 2016

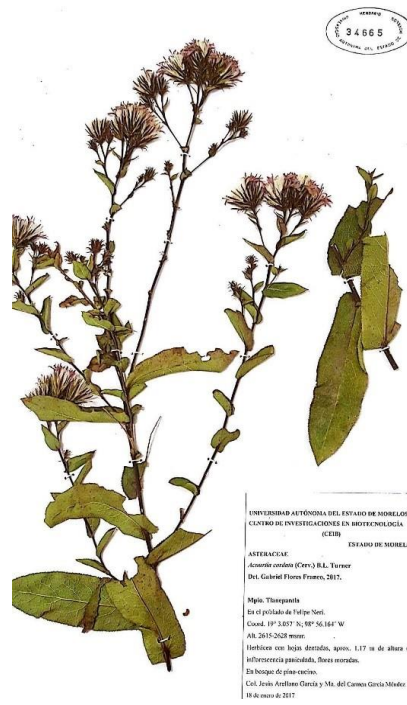

34665

UNIVERSIDAD AUTÓNOMA DEL ESTADO DE MORELOS  
CENTRO DE INVESTIGACIONES EN BIOTECNOLOGÍA  
(CIBIO) ESTADO DE MORELOS

ASTERACEAE  
Asensio-Jurado (Cruz) H.L. Turner  
Det. Gabriel Flores Franco, 2017.

Méjico, Tlaxtepan  
En el poblado de Tlaxtepan.  
Coord. 19° 32' 57" N, 98° 56' 164" W  
Alt. 2615-2628 msnm.  
Herbívora con hojas dentadas, apices 1.17 m de altura con  
inflorescencia paniculada, flores moradas.  
En bosque de pinos-encinos.  
Ced. Jesús Arellano García y Ma. del Carmen García Méndez  
18 de enero de 2017

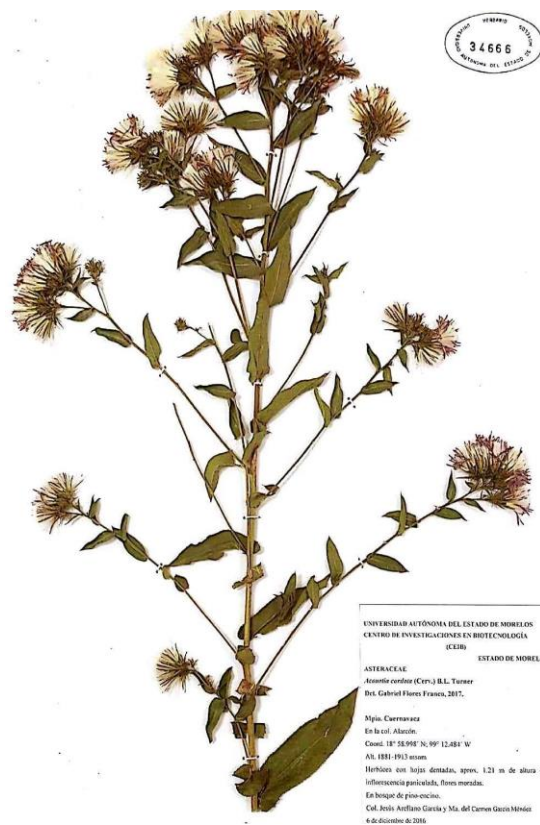

34666

UNIVERSIDAD AUTÓNOMA DEL ESTADO DE MORELOS  
CENTRO DE INVESTIGACIONES EN BIOTECNOLOGÍA  
(CIBIO) ESTADO DE MORELOS

ASTERACEAE  
*Aconitum cordatum* (Cruz) H.L. Turner  
Det. Gabriel Flores Franco, 2017.

Méjico, Cuernavaca  
En la col. Alcazón.  
Coord. 19° 58' 59" N, 99° 12' 48" W  
Alt. 1885-1958 msnm.  
Herbívora con hojas dentadas, apices 1.21 m de altura con  
inflorescencia paniculada, flores moradas.  
En bosque de pinos-encinos.  
Ced. Jesús Arellano García y Ma. del Carmen García Méndez  
6 de diciembre de 2016
