# Supplementary material for: High variability of perezone content in rhizomes of Acourtia cordata wild plants, environmental factors related, and proteomic analysis
Source: PeerJ journal article supplement (doi:10.7717/peerj.16136), 2023-11-15

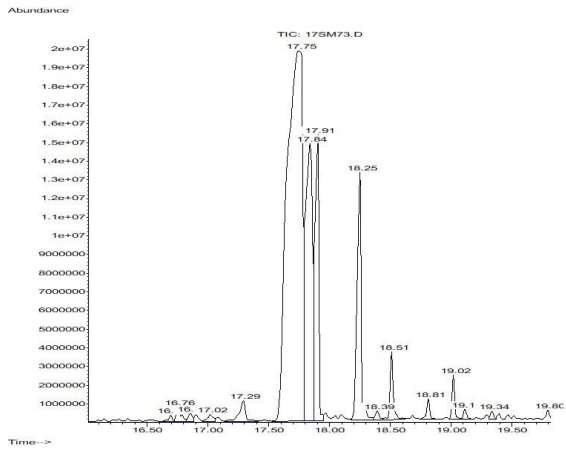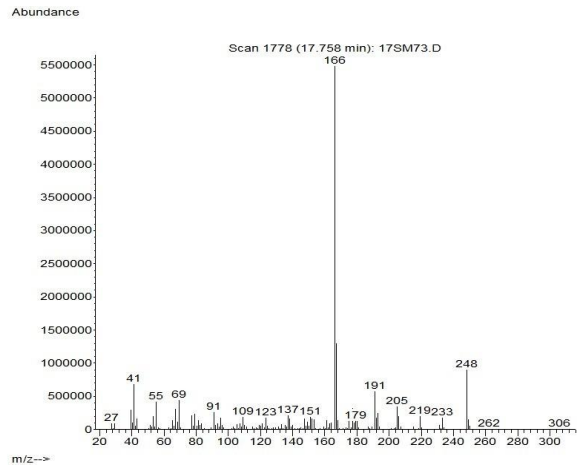

Supplement: Figure_S5.pdf [file Figure_S5.pdf]
