# Supplementary material for: High variability of perezone content in rhizomes of Acourtia cordata wild plants, environmental factors related, and proteomic analysis
Source: PeerJ. 2023 Nov 15;11:e16136. doi: 10.7717/peerj.16136 (PMC10656900; doi:10.7717/peerj.16136)
Supplement: Supplemental Information 9 [file peerj-11-16136-s009.xlsx]

## Sheet: Hoja1
Supplementary Table S2. Total identified proteins.
Accession	Peptide count	Unique peptides	Confidence score	Anova (p)	Max fold change	Highest mean condition	Lowest mean condition	Description	High1	High2	High3	Medium1	Medium2	Medium3	Low1	Low2	Low3	High (H)	Medium (M)	LOW (L)	H/M	H/L	M/L	Fold change log2(H/M)	Fold change log2(H/L)	Fold change log2(M/L)
YP_009373878.1	2	2	15.14	0.173358	2.23174	Low	High	YP_009373878.1 hypothetical chloroplast RF1 (chloroplast) [Soliva sessilis]	8912.08	7165.11	7950.11	26359.8	17040.2	8001.04	24052.1	9578.35	19992.3	8009.1	17133.7	17874.3	0.467448	0.44808	0.958568	-1.09712	-1.15817	-0.0610476
OTG19381.1	1	1	10.91	0.579063	2.22572	Medium	Low	OTG19381.1 hypothetical protein HannXRQ_Chr08g0233441 [Helianthus annuus]	7224.33	10380.9	15775.5	43579.9	21951.2	5647.13	5716.59	10958.8	15304.4	11126.9	23726.1	10660	0.468973	1.0438	2.22572	-1.09242	0.0618492	1.15427
KVI01274.1	1	1	12.18	0.0499952	2.13168	Medium	High	KVI01274.1 hypothetical protein Ccrd_020482 [Cynara cardunculus var. scolymus]	2256.3	1301.2	2997.46	3448.84	4694.95	5829.33	3507.71	2581.93	2809.84	2184.99	4657.71	2966.49	0.469113	0.736557	1.57011	-1.09199	-0.441131	0.650862
OTF84856.1	1	1	8.9	0.088134	4.34595	Low	High	OTF84856.1 putative D-3-phosphoglycerate dehydrogenase, NAD(P)-binding domain protein [Helianthus annuus]	25923.8	1456.54	1620.8	12020.4	21073.5	28589.5	52808	54721.8	18507.8	9667.05	20561.1	42012.5	0.470161	0.230099	0.489405	-1.08877	-2.11967	-1.0309
KVH94615.1	2	1	19.6	0.230408	2.14472	Low	High	KVH94615.1 hypothetical protein Ccrd_003327 [Cynara cardunculus var. scolymus]	1815.3	1196.03	1970.89	5349.48	1921.65	3308.66	2974.31	5982.72	1728.48	1660.74	3526.6	3561.83	0.47092	0.466261	0.990106	-1.08645	-1.10079	-0.0143445
OTG10353.1	1	1	8.82	0.100182	2.11963	Medium	High	OTG10353.1 putative NAD(P)-linked oxidoreductase superfamily protein [Helianthus annuus]	41327.3	46836.9	46226	101470	116180	67207.4	84875.5	113872	41223.1	44796.7	94952.6	79990.2	0.47178	0.560028	1.18705	-1.08381	-0.836429	0.247384
KVH94125.1	1	1	6.89	0.747834	2.11407	Medium	High	KVH94125.1 KIP1-like protein [Cynara cardunculus var. scolymus]	1533.42	1964.93	3734.72	9827.63	2466.76	2996.85	3640.81	334.326	9510.87	2411.02	5097.08	4495.33	0.47302	0.536339	1.13386	-1.08003	-0.898783	0.181242
KVI10662.1	5	5	59.8	0.778063	3.00612	Low	High	KVI10662.1 Ribosomal protein L30, conserved site-containing protein [Cynara cardunculus var. scolymus]	18154.3	8309.56	30750.5	87854.1	24651.2	8334.39	61080.7	5714.64	105198	19071.5	40279.9	57331.2	0.473474	0.332654	0.702583	-1.07864	-1.5879	-0.50926
OTF90286.1	1	1	6.64	0.354618	2.35931	Medium	Low	OTF90286.1 putative DNA-binding pseudobarrel domain-containing protein [Helianthus annuus]	15127.6	21197.3	23725.3	84863.2	20533.9	21409.2	7534.15	9605.3	36607.8	20016.7	42268.8	17915.8	0.473558	1.11727	2.35931	-1.07839	0.159977	1.23836
KVH93188.1	1	1	8.39	0.214638	2.10882	Medium	High	KVH93188.1 Ataxin-2, C-terminal [Cynara cardunculus var. scolymus]	17573.4	22552.5	27173.8	70053.6	46580.8	25288.9	18635.2	42179.1	39334.2	22433.2	47307.8	33382.8	0.474198	0.671999	1.41713	-1.07644	-0.573469	0.50297
KVI09327.1	1	1	9.21	0.0867213	2.108	Medium	High	KVI09327.1 Ternary complex factor MIP1, leucine-zipper [Cynara cardunculus var. scolymus]	1022.97	969.697	2158.02	1789.68	3657.71	3302.27	1870.24	2734.74	2493.97	1383.56	2916.55	2366.32	0.474383	0.584691	1.23253	-1.07588	-0.774255	0.301621
XP_021980026.1	1	1	9.02	0.628986	19.0092	Low	High	XP_021980026.1 uncharacterized protein LOC110876158 [Helianthus annuus]	60.9831	29.3075	154.568	177.826	27.8319	309.536	30.1357	135.605	4488.83	81.6196	171.731	1551.52	0.475275	0.0526061	0.110686	-1.07317	-4.24863	-3.17546
OTG13916.1	1	1	10.53	0.232119	2.09928	Medium	High	OTG13916.1 putative pentatricopeptide repeat protein [Helianthus annuus]	33492.9	19593.6	50054.3	47503.8	115235	53782.8	52111.1	34161.9	88309.9	34380.3	72173.8	58194.3	0.476354	0.590784	1.24022	-1.06989	-0.759297	0.310597
KVH88593.1	1	1	6.5	0.353983	88.571	Low	High	KVH88593.1 T-complex 11 [Cynara cardunculus var. scolymus]	545.246	185.273	220.393	1889.2	30.292	74.7424	222.701	83230.2	770.298	316.97	664.745	28074.4	0.47683	0.0112904	0.023678	-1.06845	-6.46876	-5.40031
XP_021995909.1	1	1	9.13	0.297466	3.29279	Medium	Low	XP_021995909.1 uncharacterized protein LOC110893096 [Helianthus annuus]	14650.4	29242.6	6860.62	73768.5	14177	18458.5	11049.1	11610.2	9654.89	16917.9	35468	10771.4	0.47699	1.57063	3.29279	-1.06797	0.65134	1.71931
KVH92077.1	1	1	7.2	0.0894606	2.09525	Medium	High	KVH92077.1 Armadillo repeat-containing protein 3 and Serine/threonine-protein kinase CTR1, partial [Cynara cardunculus var. scolymus]	528486	408777	563247	784819	1.43146e+06	927672	837776	339427	669273	500170	1.04798e+06	615492	0.477269	0.812634	1.70267	-1.06712	-0.299322	0.767802
OTG34629.1	1	1	6.37	0.745885	2.09486	Medium	High	OTG34629.1 putative DNA-binding domain-containing protein [Helianthus annuus]	58794	34175.3	46431.5	26570.6	203861	61593.6	66367.3	16094.6	79831.2	46466.9	97341.9	54097.7	0.477358	0.858944	1.79937	-1.06686	-0.219363	0.847494
OTG20463.1	1	1	6.81	0.366831	19.9693	Low	High	OTG20463.1 putative metalloenzyme, LuxS/M16 peptidase-like protein [Helianthus annuus]	77.88	27.5327	128.227	164.544	28.2711	296.292	67.4167	29.6346	3013.37	77.88	163.036	1036.81	0.477687	0.0751151	0.157248	-1.06586	-3.73475	-2.66889
KVH99831.1	1	1	7.51	0.420965	2.48595	Medium	Low	KVH99831.1 RNA-dependent RNA polymerase, eukaryotic-type [Cynara cardunculus var. scolymus]	22992	3740.97	39914.2	77417.3	16396	45254.4	22493.6	18703.6	14744.2	22215.7	46355.9	18647.1	0.479243	1.19138	2.48595	-1.06117	0.252629	1.3138
OTG21784.1	1	1	38.49	0.494675	2.09455	Low	High	OTG21784.1 hypothetical protein HannXRQ_Chr06g0164311 [Helianthus annuus]	33551.6	5986.43	16970.4	30922.6	65556.9	21360.7	77171.7	9328.87	31859.1	18836.1	39280	39453.2	0.479535	0.47743	0.995611	-1.06029	-1.06664	-0.00634571
OTG26778.1	1	1	9.5	0.347395	2.08482	Medium	High	OTG26778.1 putative NDUFAF3/Mth938 domain-containing protein [Helianthus annuus]	6301.98	3513.69	10254.4	12459.2	21481.3	7901.96	4326.78	16393.1	9059.89	6690.03	13947.5	9926.59	0.479658	0.673951	1.40506	-1.05992	-0.569285	0.490637
XP_022021263.1	2	1	23.51	0.66484	2.08333	Medium	High	XP_022021263.1 lysosomal Pro-X carboxypeptidase-like [Helianthus annuus]	3079.68	4418.05	3035.29	3512.72	3346.92	15084.1	2501.2	2842.57	9027.12	3511.01	7314.59	4790.3	0.480001	0.732941	1.52696	-1.05889	-0.448231	0.61066
KVH98565.1	1	1	11.46	0.100097	2.4717	Medium	Low	KVH98565.1 Quinonprotein alcohol dehydrogenase-like-superfamily [Cynara cardunculus var. scolymus]	2869.92	4182.85	6861.36	13564.8	7344.44	8055.49	3424	1815.05	6479.52	4638.04	9654.91	3906.19	0.480382	1.18736	2.4717	-1.05775	0.247754	1.3055
KVI09947.1	2	1	14.63	0.267855	2.07858	Medium	High	KVI09947.1 Anaphase-promoting complex subunit 1 [Cynara cardunculus var. scolymus]	497593	368987	924300	1.46769e+06	1.1486e+06	1.10619e+06	938108	285048	1.35561e+06	596960	1.24083e+06	859589	0.481099	0.694472	1.44351	-1.05559	-0.526013	0.529582
OTG03489.1	1	1	8.1	0.61288	6.66942	Low	High	OTG03489.1 putative CBL-interacting protein kinase 7 [Helianthus annuus]	183.086	499.579	696.192	1047.98	460.068	1357.57	179.016	814.932	8202.23	459.619	955.207	3065.39	0.481172	0.149938	0.31161	-1.05538	-2.73756	-1.68219
OTG36326.1	1	1	8.26	0.638242	2.06836	Medium	High	OTG36326.1 putative methylcrotonyl-CoA carboxylase alpha chain [Helianthus annuus]	2992.78	5070.08	2867.19	16182.5	3166.77	3258.02	2843.15	5408.23	3491.92	3643.35	7535.77	3914.43	0.483474	0.930748	1.92513	-1.04849	-0.103538	0.944953
KVI03473.1	1	1	10.11	0.431777	2.06593	Medium	High	KVI03473.1 Ataxin-2, C-terminal [Cynara cardunculus var. scolymus]	2666.25	2507.91	684.708	2900.1	6338.14	2865.79	2731.62	988.915	5494.06	1952.96	4034.68	3071.53	0.484043	0.635825	1.31357	-1.04679	-0.653298	0.393495
KVH94774.1	1	1	7.2	0.0907139	2.06499	Medium	High	KVH94774.1 Nucleic acid-binding, OB-fold, partial [Cynara cardunculus var. scolymus]	3280.41	7801.13	5087.71	9786.94	16456.7	7145.71	10382.4	9180.24	8612.58	5389.75	11129.8	9391.74	0.484264	0.573882	1.18506	-1.04614	-0.801175	0.244961
KVI03392.1	2	1	38.64	0.159003	2.21774	Medium	High	KVI03392.1 Nascent polypeptide-associated complex NAC domain-containing protein [Cynara cardunculus var. scolymus]	6648.25	3834.87	8031.69	16136.2	13691.2	8271.36	3193.97	2464.66	11520.5	6171.6	12699.6	5726.37	0.485968	1.07775	2.21774	-1.04107	0.108024	1.14909
OTG20759.1	1	1	11.59	0.609965	2.05707	Medium	High	OTG20759.1 putative protein kinase-like domain, Leucine-rich repeat domain, L domain-like protein [Helianthus annuus]	2.01776e+06	594263	1.51024e+06	2.77854e+06	4.1484e+06	1.55285e+06	2.5972e+06	163762	3.56961e+06	1.37409e+06	2.82659e+06	2.11019e+06	0.486129	0.651168	1.3395	-1.04059	-0.618897	0.421692
KVI07616.1	1	1	7.8	0.404459	2.03492	Medium	High	KVI07616.1 K Homology domain-containing protein [Cynara cardunculus var. scolymus]	15644.7	14558.3	17438.7	55722.7	28627.3	12597	16130.3	8510.03	26246	15880.6	32315.7	16962.1	0.49142	0.936237	1.90517	-1.02497	-0.095055	0.929917
KVI09179.1	1	1	11.62	0.721974	2.02783	Medium	High	KVI09179.1 Nucleotide-binding, alpha-beta plait, partial [Cynara cardunculus var. scolymus]	427791	193270	283226	315683	1.20944e+06	308618	499796	100588	808510	301429	611247	469631	0.493138	0.641842	1.30155	-1.01994	-0.63971	0.380227
KVH97577.1	1	1	8.34	0.376702	2.02312	Medium	High	KVH97577.1 Aspartic peptidase [Cynara cardunculus var. scolymus]	15515.6	11041.7	16322.4	12778.8	18941.9	55029.8	14774.6	14011.1	16593.7	14293.2	28916.8	15126.4	0.494287	0.944916	1.91168	-1.01658	-0.0817421	0.934837
KVG91778.1	1	1	7.92	0.0633179	2.01597	Medium	High	KVG91778.1 hypothetical protein Ccrd_026107, partial [Cynara cardunculus var. scolymus]	6036.77	3329.5	3674.96	8476.38	5978.61	11835.7	4860.4	6524.49	4691.05	4347.08	8763.57	5358.65	0.496039	0.811226	1.63541	-1.01147	-0.301823	0.70965
ABK96812.1	1	1	12.39	0.0627104	3.9199	Low	High	ABK96812.1 lipid transfer protein isoform 1.2, partial [Lactuca sativa]	6827.32	7089.12	2312.85	18121.9	6838.33	7514.91	13163.9	34540.5	15912.8	5409.76	10825.1	21205.7	0.499745	0.255109	0.510478	-1.00074	-1.97082	-0.97008
OTG37091.1	1	1	16.93	0.250346	1.99786	Medium	High	OTG37091.1 putative protein kinase-like domain-containing protein [Helianthus annuus]	467841	515106	925302	891239	1.81391e+06	1.10727e+06	1.35776e+06	466182	1.26861e+06	636083	1.2708e+06	1.03085e+06	0.500536	0.617046	1.23277	-0.998455	-0.69655	0.301905
KVI06131.1	1	1	7.72	0.0979768	2.1026	Medium	Low	KVI06131.1 Pentatricopeptide repeat-containing protein [Cynara cardunculus var. scolymus]	1.46214e+06	1.73483e+06	2.86837e+06	3.17139e+06	5.3697e+06	3.56456e+06	2.08362e+06	953509	2.72033e+06	2.02178e+06	4.03522e+06	1.91915e+06	0.501034	1.05348	2.1026	-0.997021	0.0751564	1.07218
OTG29224.1	1	1	7.1	0.315166	2.50062	Medium	Low	OTG29224.1 putative VPS54 [Helianthus annuus]	11002.6	9747.37	19547.1	13174.7	52438.5	14788.3	15465.3	11777.9	4909.39	13432.4	26800.5	10717.5	0.501199	1.25331	2.50062	-0.996546	0.325741	1.32229
AQU12740.1	9	2	136.63	0.128949	3.4428	Low	High	AQU12740.1 histone H3, partial [Chrysanthemum x morifolium]	100419	62681	117546	341922	122549	95295.6	365022	134129	467058	93548.9	186589	322070	0.501364	0.290461	0.579342	-0.99607	-1.78358	-0.787512
KVI08547.1	1	1	7.51	0.369881	2.48168	Medium	Low	KVI08547.1 SEC-C motif-containing protein [Cynara cardunculus var. scolymus]	1332.65	1162.08	1373.55	769.795	2832.73	4094.01	1136.59	268.378	1696.37	1289.43	2565.51	1033.78	0.5026	1.24729	2.48168	-0.992517	0.3188	1.31132
OTF99510.1	1	1	9.16	0.351907	3.15272	Medium	Low	OTF99510.1 putative protein kinase superfamily protein [Helianthus annuus]	12415.9	28918.5	31779.4	115244	25506.6	4712.64	1166.83	1562.07	43410.1	24371.3	48487.7	15379.7	0.502628	1.58464	3.15272	-0.992436	0.664159	1.6566
OTG20625.1	1	1	8.3	0.0155408	2.21887	Low	High	OTG20625.1 hypothetical protein HannXRQ_Chr07g0195181 [Helianthus annuus]	3492.73	3372.92	4606.79	4736.92	8387.13	9700.29	9090.07	8793.66	7572.08	3824.15	7608.11	8485.27	0.50264	0.45068	0.896626	-0.992401	-1.14982	-0.157422
KVI06782.1	1	1	7.25	0.283102	2.1068	Low	High	KVI06782.1 Protein kinase, catalytic domain-containing protein, partial [Cynara cardunculus var. scolymus]	303888	411841	324855	340673	1.32763e+06	399902	794953	960382	436971	346861	689400	730769	0.503135	0.474653	0.94339	-0.990982	-1.07506	-0.0840734
OTG04619.1	2	1	26.82	0.438725	1.97677	Medium	High	OTG04619.1 putative 10 kDa chaperonin [Helianthus annuus]	3519.29	954.974	6040.27	7510.33	9662.97	3611.49	2979.44	573.121	7288.98	3504.84	6928.27	3613.85	0.505876	0.969837	1.91714	-0.983144	-0.0441854	0.938959
KVI12162.1	1	1	8.48	0.00136895	2.1453	Low	High	KVI12162.1 Arf GTPase activating protein [Cynara cardunculus var. scolymus]	6117.67	6535.51	7429.24	10539.2	14498.4	14425.3	15566	15466.3	12050.5	6694.14	13154.3	14360.9	0.508893	0.466135	0.915979	-0.974565	-1.10118	-0.126613
OTG31596.1	1	1	6.06	0.205813	3.31353	Low	High	OTG31596.1 putative dynamin central domain, GTPase effector domain-containing protein [Helianthus annuus]	893.405	1629.93	1079.3	839.404	1220.1	5012.87	1707.35	5087.85	5142.25	1200.88	2357.46	3979.15	0.509395	0.301793	0.592453	-0.973142	-1.72837	-0.755228
OTG31607.1	2	1	24.32	0.554191	2.59609	Medium	Low	OTG31607.1 putative terpenoid cyclases/protein prenyltransferase alpha-alpha toroid [Helianthus annuus]	1278.96	14299.9	18153	39198	21066.6	5914.79	2192.23	7300	15999.8	11243.9	22059.8	8497.32	0.509703	1.32323	2.59609	-0.972273	0.404067	1.37634
OTG28152.1	1	1	6.76	0.315006	2.28998	Medium	Low	OTG28152.1 putative nucleotide-binding alpha-beta plait domain-containing protein [Helianthus annuus]	69186.9	43060.1	81499.6	54705.8	208171	117048	48700.5	15245.5	101962	64582.2	126642	55302.5	0.50996	1.1678	2.28998	-0.971544	0.223792	1.19534
OTG16973.1	1	1	6.23	0.452401	1.95777	Medium	High	OTG16973.1 putative ARID/BRIGHT DNA-binding domain-containing protein [Helianthus annuus]	342713	438872	418368	623167	1.35031e+06	375757	828712	232733	413902	399984	783077	491782	0.510785	0.813336	1.59232	-0.969212	-0.298077	0.671135
KVH99667.1	1	1	6.95	0.375988	2.05768	Medium	Low	KVH99667.1 Multi antimicrobial extrusion protein, partial [Cynara cardunculus var. scolymus]	60253	44584.6	111671	49698.3	157493	216667	73708	73552.7	58727.6	72169.6	141286	68662.8	0.510805	1.05107	2.05768	-0.969155	0.0718634	1.04102
KVH97149.1	1	1	11.66	0.464504	1.95334	Medium	High	KVH97149.1 hypothetical protein Ccrd_000763 [Cynara cardunculus var. scolymus]	1496.81	3183.39	5922.44	7452.36	9052.22	4205.95	4510.86	631.39	7377.98	3534.21	6903.51	4173.41	0.511944	0.84684	1.65416	-0.965942	-0.239839	0.726103
OTG12151.1	1	1	6	0.741468	1.94967	Medium	High	OTG12151.1 putative translation elongation factor EFG/EF2, archaeal [Helianthus annuus]	5826.43	1315.82	9718.44	9537.32	18146.3	5189.2	13970.2	518.187	18236.7	5620.23	10957.6	10908.4	0.512907	0.515222	1.00451	-0.963231	-0.956733	0.0064981
XP_022008238.1	2	1	17.3	0.212965	4.89003	Low	High	XP_022008238.1 uncharacterized protein LOC110907586 [Helianthus annuus]	18686.5	22047.1	13870.2	20926.8	32460	52886.3	74187.4	175731	17095.5	18201.3	35424.4	89004.8	0.513807	0.204498	0.398005	-0.960702	-2.28984	-1.32914
OTG03520.1	1	1	6	0.47044	1.9421	Medium	High	OTG03520.1 putative FAR1 DNA binding domain, Zinc finger, SWIM-type, MULE transposase domain, FHY3/FAR1 family [Helianthus annuus]	732.316	810.008	477.22	930.085	2249.42	742.646	492.941	879.928	1843.1	673.181	1307.38	1071.99	0.514907	0.627974	1.21959	-0.957617	-0.671223	0.286394
OTG02529.1	1	1	11.59	0.327882	2.42961	Low	High	OTG02529.1 putative P-loop containing nucleoside triphosphate hydrolases superfamily protein [Helianthus annuus]	7127.57	3942.06	3679.74	10015.5	13952.5	4632.95	22400.6	4968.1	8466.53	4916.45	9533.63	11945.1	0.515696	0.411589	0.798123	-0.955408	-1.28073	-0.325317
OTF96356.1	2	2	23.04	0.00693686	3.35249	Low	High	OTF96356.1 putative pathogenesis-related thaumatin superfamily protein [Helianthus annuus]	2865.7	4396.03	2863.26	5570.58	8507.02	5552.71	16306.7	8424.97	9212.28	3375	6543.44	11314.6	0.515784	0.298286	0.578315	-0.955161	-1.74523	-0.790072
OTG18385.1	5	1	92.78	0.150482	1.93739	Medium	High	OTG18385.1 putative peroxidase 4 [Helianthus annuus]	6971.46	9945.79	13547.3	16990	24596.5	17435.1	21376.5	10647.5	7876.86	10154.8	19673.9	13300.3	0.516159	0.763506	1.47921	-0.954113	-0.389289	0.564824
KVH87953.1	1	1	16.95	0.068471	4.20789	Low	High	KVH87953.1 Ribosomal protein L5 eukaryotic/L18 archaeal [Cynara cardunculus var. scolymus]	16756.5	24423.2	14865.8	54795.1	40869.5	12775.2	64018.1	128935	42880.2	18681.8	36146.6	78611	0.516835	0.237649	0.459816	-0.952224	-2.0731	-1.12087
XP_021994822.1	1	1	14.15	0.0666625	2.1392	Medium	Low	XP_021994822.1 uncharacterized protein LOC110891434 [Helianthus annuus]	184949	219055	301887	273196	437301	654616	162392	216717	259034	235297	455038	212714	0.517094	1.10617	2.1392	-0.951502	0.145567	1.09707
OTF97576.1	1	1	10.11	0.215081	1.93167	Medium	High	OTF97576.1 putative concanavalin A-like lectin/glucanase domain-containing protein [Helianthus annuus]	9664.67	7452.38	5155.87	7358.46	10638.7	25026.8	13477.9	14893.2	11546.4	7424.3	14341.3	13305.9	0.517687	0.557973	1.07782	-0.949847	-0.841734	0.108114
XP_022033583.1	2	1	20.43	0.622178	4.63814	Medium	Low	XP_022033583.1 uncharacterized protein LOC110935511 isoform X1 [Helianthus annuus]	737370	24790.3	11661.6	292598	1.18494e+06	17182.2	299956	7809.7	14501.1	257941	498239	107422	0.517705	2.40119	4.63814	-0.949798	1.26375	2.21355
OTG16747.1	2	1	17.61	0.748573	2.93503	Low	High	OTG16747.1 putative ubiquitin carboxyl-terminal hydrolase family protein [Helianthus annuus]	685.97	895.417	999.565	827.851	1213.05	2941.05	313.47	1519.52	5742.18	860.317	1660.65	2525.06	0.518061	0.340712	0.657668	-0.948807	-1.55337	-0.604568
XP_021983297.1	1	1	7.54	0.1787	2.89294	Medium	Low	XP_021983297.1 receptor-like protein kinase FERONIA [Helianthus annuus]	295859	400827	326523	435412	581967	956428	532736	131096	18453.4	341070	657936	227428	0.518394	1.49968	2.89294	-0.94788	0.584655	1.53253
KVI05912.1	5	5	76.67	0.217998	1.92488	Medium	High	KVI05912.1 Acid phosphatase (Class B) [Cynara cardunculus var. scolymus]	157450	70468.4	120696	192529	331597	146914	163802	85646.4	176970	116205	223680	142140	0.519514	0.817541	1.57366	-0.944765	-0.290637	0.654128
KVF39301.1	1	1	12.93	0.191937	743.599	Low	High	KVF39301.1 cytochrome P450 [Cynara cardunculus var. scolymus]	1108.69	1099.47	875.49	1214.21	2330.25	2372.31	3216.85	4505.49	2.28527e+06	1027.88	1972.26	764332	0.521171	0.00134481	0.00258036	-0.940172	-9.53838	-8.59821
OTG23392.1	1	1	7.77	0.79566	2.3037	Medium	Low	OTG23392.1 putative C2 domain, Formin, FH2 domain, Protein-tyrosine phosphatase-like protein [Helianthus annuus]	8748.5	13989.6	13357.8	8955.46	4861.97	55427.3	14656.7	12257.2	3144.23	12032	23081.6	10019.4	0.52128	1.20087	2.3037	-0.939869	0.264082	1.20395
KVH90976.1	1	1	12.11	0.271969	2.31812	Medium	Low	KVH90976.1 Armadillo-like helical [Cynara cardunculus var. scolymus]	185595	97124.8	466221	569209	550541	315413	136364	38817.1	443925	249647	478388	206368	0.521851	1.20972	2.31812	-0.93829	0.274668	1.21296
XP_021995364.1	1	1	7.78	0.135524	1.91518	Medium	High	XP_021995364.1 uncharacterized protein LOC110892513 [Helianthus annuus]	67703.7	25208.8	69121.8	78841	125364	106119	51909.1	40342.2	76700.8	54011.4	103441	56317.4	0.522145	0.959055	1.83676	-0.937477	-0.0603145	0.877163
OTG28677.1	1	1	10.52	0.0923586	2.01691	Medium	Low	OTG28677.1 putative BEACH domain-containing protein [Helianthus annuus]	253743	299360	470799	525955	878632	553661	354773	177031	439112	341301	652749	323639	0.522867	1.05457	2.01691	-0.935485	0.0766606	1.01215
XP_021995905.1	1	1	6.64	0.462895	1.90859	Medium	High	XP_021995905.1 uncharacterized protein LOC110893092 [Helianthus annuus]	13211.5	6115.46	16422	17597.8	38379.3	12253	23898.8	11127.3	1736.39	11916.3	22743.4	12254.2	0.523947	0.97243	1.85597	-0.932508	-0.040333	0.892175
XP_022033326.1	1	1	6.96	0.756631	1.9069	Medium	High	XP_022033326.1 uncharacterized protein LOC110934961 [Helianthus annuus]	2488.26	2021.07	1779.56	2033.85	7544.51	2413.92	6651.06	310.966	2985.54	2096.3	3997.42	3315.85	0.524412	0.632204	1.20555	-0.931228	-0.661538	0.26969
XP_022014958.1	1	1	7.77	0.127192	3.26871	Medium	Low	XP_022014958.1 uncharacterized protein LOC110914479 [Helianthus annuus]	7586.24	10633.1	5648.55	10288.6	23263.7	11793.9	7737.57	895.256	5239.98	7955.95	15115.4	4624.27	0.526348	1.72048	3.26871	-0.92591	0.782809	1.70872
KVI05104.1	1	1	8.57	0.476583	1.8994	Medium	High	KVI05104.1 Clp, N-terminal [Cynara cardunculus var. scolymus]	5920.89	4084.85	4771.96	3570.26	7758.12	16740.4	5338.75	4396.93	6187.52	4925.9	9356.27	5307.73	0.526481	0.928061	1.76276	-0.925546	-0.107708	0.817837
CBD35169.1	1	1	10.3	0.570731	1.89919	Medium	High	CBD35169.1 unnamed protein product [Helianthus annuus]	2379.97	695.091	1659.96	3881.88	4271.01	839.799	3537.5	1494.21	2636.7	1578.34	2997.56	2556.14	0.526541	0.617471	1.17269	-0.925383	-0.695558	0.229825
KVH90918.1	1	1	6.29	0.304802	4.47836	Medium	Low	KVH90918.1 Cystatin [Cynara cardunculus var. scolymus]	2272.32	632.838	6706.89	6178.28	10443.7	1510.3	1791.86	602.372	1654.63	3204.01	6044.09	1349.62	0.530107	2.37401	4.47836	-0.915643	1.24733	2.16297
OTG06942.1	1	1	14.35	0.446169	1.88427	Medium	High	OTG06942.1 putative glycoside hydrolase family 31 [Helianthus annuus]	11809.4	10486.8	14391.5	15731.7	38728.5	14669.3	22829.5	8138.76	25239.5	12229.2	23043.2	18735.9	0.530709	0.652716	1.22989	-0.914007	-0.615473	0.298534
KVI09318.1	2	1	27.04	0.204	2.78526	Medium	Low	KVI09318.1 Peptidase S10, serine carboxypeptidase [Cynara cardunculus var. scolymus]	10394.9	4720.2	12532.5	6786.38	27656.2	17631.5	9197.69	4758.75	4739.89	9215.84	17358	6232.11	0.530927	1.47877	2.78526	-0.913416	0.564396	1.47781
KVH98010.1	2	1	71.28	0.530195	1.88325	Medium	High	KVH98010.1 Histone core [Cynara cardunculus var. scolymus]	15133.4	50.5988	13712.5	18258.3	15131.5	21029.5	19561.2	639.679	13320	9632.19	18139.8	11173.6	0.530998	0.862046	1.62344	-0.913221	-0.214164	0.699057
XP_021985807.1	1	1	8.71	0.65988	1.88292	Medium	High	XP_021985807.1 uncharacterized protein LOC110882004 [Helianthus annuus]	19636.8	20569	15107.5	48016.3	45147.3	10986.8	28057.4	7673.58	30354.3	18437.8	34716.8	22028.4	0.531091	0.836999	1.576	-0.91297	-0.256702	0.656268
KVH97678.1	1	1	10.89	0.2756	2.8824	Low	High	KVH97678.1 Pectinesterase inhibitor [Cynara cardunculus var. scolymus]	5478.81	3373.55	6452.37	4681.06	17583.7	6519.42	7097.82	28154	8862.58	5101.58	9594.73	14704.8	0.531706	0.346933	0.65249	-0.911298	-1.52727	-0.615973
KVH95798.1	1	1	6.37	0.0570377	3.41884	Low	High	KVH95798.1 Calcium-binding EF-hand [Cynara cardunculus var. scolymus]	449.239	1132.32	467.984	1642.52	1561.13	647.844	2302.9	3338.25	1365.89	683.18	1283.83	2335.68	0.532142	0.292497	0.54966	-0.910117	-1.77351	-0.863388
OTG28819.1	1	1	11.25	0.00160588	4.48475	Low	High	OTG28819.1 putative invertase inhibitor [Helianthus annuus]	1776.87	682.899	1095.37	2547.87	1949.75	2180.9	5509.63	5144.11	5290.18	1185.05	2226.17	5314.64	0.532325	0.222978	0.418876	-0.909621	-2.16503	-1.25541
KVH96036.1	1	1	17.15	0.655484	1.87804	Medium	High	KVH96036.1 BTB/POZ fold [Cynara cardunculus var. scolymus]	7334.67	702.397	15411.6	16087.7	22734.9	5214.79	4066	600.417	34445.4	7816.21	14679.1	13037.3	0.532471	0.599528	1.12594	-0.909226	-0.738101	0.171125
OTG33552.1	1	1	7.83	0.216531	1.87771	Medium	High	OTG33552.1 putative histidine kinase-like ATPase, C-terminal domain-containing protein [Helianthus annuus]	13269.1	8709.79	10211.8	12739.7	23732.4	23972.6	20310.1	8012.24	16432.5	10730.2	20148.3	14918.3	0.532563	0.719267	1.35058	-0.908976	-0.475401	0.433575
KVH90103.1	1	1	6.07	0.306559	1.87645	Medium	High	KVH90103.1 Dimeric alpha-beta barrel, partial [Cynara cardunculus var. scolymus]	68451.9	48473.1	34876.5	124741	103214	56892.2	79711.4	42444.5	141501	50600.5	94949.2	87885.6	0.532922	0.575754	1.08037	-0.908003	-0.796476	0.111528
KVI08476.1	1	1	7.13	0.830207	1.87531	Medium	High	KVI08476.1 Nck-associated protein 1, partial [Cynara cardunculus var. scolymus]	1645.35	488.526	1081.04	489.887	1149.54	4389.54	937.317	1599.79	1437.88	1071.64	2009.65	1325	0.533245	0.808786	1.51672	-0.907129	-0.30617	0.600959
OTG06928.1	2	1	14.56	0.428088	2.37857	Low	High	OTG06928.1 putative kinesin motor domain-containing protein [Helianthus annuus]	4318.62	7226.42	7936.72	13504.8	8820.31	14202.1	8914.65	4768.35	32655.7	6493.92	12175.7	15446.2	0.533348	0.420421	0.788267	-0.90685	-1.25009	-0.343244
OTG32187.1	1	1	6.02	0.599827	1.86604	Medium	High	OTG32187.1 putative butirosin biosynthesis, BtrG-like protein [Helianthus annuus]	1536.57	1268.94	532.068	1392.96	887.311	3947.79	2090.76	2188.85	807.345	1112.52	2076.02	1695.65	0.535893	0.656105	1.22432	-0.899983	-0.608002	0.291981
OTG34156.1	2	2	26.71	0.150639	1.85926	Medium	High	OTG34156.1 putative heme peroxidase [Helianthus annuus]	24033.9	15233.3	27878.7	27916.8	46024.4	50900.1	40241.7	24831.1	19637.3	22382	41613.8	28236.7	0.53785	0.792655	1.47375	-0.894725	-0.335235	0.55949
KVH92421.1	4	1	61.87	0.146607	2.41882	Low	High	KVH92421.1 KOW-like protein [Cynara cardunculus var. scolymus]	2437.74	1977.05	2758.78	5370	5229.9	2730.63	8762.57	2640.15	5948.87	2391.19	4443.51	5783.86	0.538131	0.413424	0.76826	-0.893972	-1.2743	-0.380333
KVH95386.1	1	1	6.69	0.0889089	3.15749	Medium	High	KVH95386.1 ARID/BRIGHT DNA-binding domain-containing protein [Cynara cardunculus var. scolymus]	7801.38	6219.9	12482.5	14258.8	24475.4	10403.4	3766.3	1748.88	10047.1	8834.6	16379.2	5187.41	0.53938	1.70308	3.15749	-0.890627	0.76815	1.65878
OTG23462.1	2	2	14.05	0.0642881	1.85293	Medium	High	OTG23462.1 putative smg-4/UPF3 family protein [Helianthus annuus]	7775.19	6387.64	8357.65	18146.4	14194.4	9388.08	8604.18	11831.9	13166.4	7506.83	13909.6	11200.8	0.539686	0.670204	1.24184	-0.889809	-0.577328	0.312481
OTG29693.1	1	1	9.59	0.385625	1.84895	Medium	High	OTG29693.1 putative 6-phosphogluconate dehydrogenase family protein [Helianthus annuus]	6196.31	3926.62	7390.64	16538.7	8482.27	7360.85	3623.04	7479.17	12807.1	5837.86	10793.9	7969.76	0.540846	0.732501	1.35436	-0.886709	-0.449098	0.437611
XP_022008742.1	2	2	19.18	0.609696	1.84676	Medium	High	XP_022008742.1 40S ribosomal protein S11-like [Helianthus annuus]	135759	129539	154510	80631.4	418356	276298	196473	112538	148443	139936	258428	152485	0.541488	0.917704	1.69478	-0.885	-0.123899	0.761101
OTG18783.1	1	1	7.92	0.750008	1.8456	Medium	High	OTG18783.1 putative RHO guanyl-nucleotide exchange factor 7 [Helianthus annuus]	411584	439475	376280	171781	994548	1.09885e+06	812026	807981	337436	409113	755059	652481	0.541829	0.627012	1.15721	-0.88409	-0.673435	0.210655
OTG22790.1	1	1	8.94	0.0438972	3.36374	Medium	High	OTG22790.1 hypothetical protein HannXRQ_Chr06g0175341 [Helianthus annuus]	1636.87	2751.06	5438.92	4601.52	9042.12	4489.53	1534.88	2267.95	1587.93	3275.61	6044.39	1796.92	0.541926	1.8229	3.36374	-0.883831	0.866237	1.75007
KVH91658.1	1	1	13.9	0.157667	1.84397	Medium	High	KVH91658.1 NAD(P)-binding domain-containing protein [Cynara cardunculus var. scolymus]	59194.4	90458.2	66909.4	203006	106630	89696.6	81279	130807	103247	72187.3	133111	105111	0.542309	0.686772	1.26638	-0.882813	-0.542097	0.340715
XP_022030907.1	1	1	7.69	0.164354	1.83756	Medium	High	XP_022030907.1 nucleolin 2-like [Helianthus annuus]	6448.54	7630.36	6842.16	12289.6	18266.8	7887.29	9774.92	8484.65	17548.6	6973.68	12814.6	11936	0.5442	0.584254	1.0736	-0.877791	-0.775332	0.102459
XP_022001845.1	1	1	7.9	0.130225	1.83752	Medium	High	XP_022001845.1 TMV resistance protein N-like isoform X1 [Helianthus annuus]	7989.48	8875.53	8757.61	14851.4	8135.06	24095.6	15279.7	13759	16561.4	8540.87	15694	15200.1	0.544212	0.561897	1.0325	-0.87776	-0.831622	0.0461377
OTG18872.1	6	1	124.11	0.270443	1.98565	Medium	Low	OTG18872.1 putative histone H2A [Helianthus annuus]	43967	33691.4	41779.7	85434.3	77906.5	56001.1	68255.4	6635.33	35572.6	39812.7	73114	36821.1	0.544529	1.08125	1.98565	-0.876918	0.112695	0.989613
KVI01887.1	1	1	7.22	0.303447	3.94162	Medium	Low	KVI01887.1 hypothetical protein Ccrd_019827 [Cynara cardunculus var. scolymus]	5906.49	74.6511	44.4141	1166.68	6047.48	3819.65	2190.73	237.98	370.601	2008.52	3677.94	933.104	0.546099	2.15251	3.94162	-0.872765	1.10602	1.97879
OTF90670.1	1	1	7.98	0.420225	2.1127	Medium	Low	OTF90670.1 putative F-box domain, Leucine-rich repeat domain, L domain-like protein [Helianthus annuus]	46010	27279.9	65573	68592.3	147876	37742.5	36275.5	5119.09	78930.3	46287.6	84736.9	40108.3	0.546251	1.15407	2.1127	-0.872364	0.206726	1.07909
KVH96160.1	1	1	8.63	0.481889	2.63926	Medium	Low	KVH96160.1 hypothetical protein Ccrd_001758 [Cynara cardunculus var. scolymus]	580.405	354.881	1082.28	617.768	368.313	2705	887.967	453.719	56.8428	672.52	1230.36	466.176	0.546605	1.44263	2.63926	-0.871429	0.528703	1.40013
KVH97647.1	5	5	122.28	0.317181	1.81961	Medium	Low	KVH97647.1 Bet v I domain-containing protein [Cynara cardunculus var. scolymus]	243689	206581	292251	235059	683988	432052	362277	207446	384355	247507	450366	318026	0.549568	0.77826	1.41613	-0.863629	-0.361675	0.501954
OTG07728.1	1	1	6.26	0.0399267	6.24881	Medium	Low	OTG07728.1 hypothetical protein HannXRQ_Chr11g0333731 [Helianthus annuus]	35996.8	27866.8	91257.4	97319.1	126133	57808.5	36839.4	5410.41	2760.48	51707	93753.5	15003.4	0.551521	3.44634	6.24881	-0.858514	1.78507	2.64358
AHC92282.1	8	1	118.84	0.478694	1.81002	Medium	High	AHC92282.1 glyceraldehyde-3-phosphate dehydrogenase, partial [Tragopogon capitatus]	10393.4	38268.1	9690.4	21599.9	33579.1	50439.1	49359.3	36960	9348.66	19450.6	35206	31889.3	0.55248	0.609941	1.10401	-0.856007	-0.713257	0.142749
KVI04560.1	2	1	22.37	0.660017	1.80979	Medium	High	KVI04560.1 Glycoside hydrolase, catalytic domain-containing protein [Cynara cardunculus var. scolymus]	5817.82	4846.92	10049.4	8652.37	24192.1	4643.66	10600.5	2843.89	7920.1	6904.7	12496	7121.51	0.552551	0.969556	1.75469	-0.855819	-0.0446044	0.811215
OTG10366.1	1	1	6.96	0.177495	1.80925	Medium	High	OTG10366.1 hypothetical protein HannXRQ_Chr10g0286791 [Helianthus annuus]	4826.24	3465.93	4465.91	5999.02	12227.4	4856.08	8458.78	5793.69	5943.85	4252.69	7694.17	6732.11	0.552716	0.631703	1.14291	-0.855389	-0.662681	0.192708
KVI10133.1	1	1	6.89	0.365826	1.80493	Medium	High	KVI10133.1 Longin domain-containing protein [Cynara cardunculus var. scolymus]	202479	120196	244941	396131	470610	157768	249483	164353	260669	189205	341503	224835	0.554037	0.84153	1.51891	-0.851946	-0.248913	0.603033
OTG11373.1	1	1	8.06	0.0471109	1.80239	Medium	High	OTG11373.1 hypothetical protein HannXRQ_Chr10g0298001 [Helianthus annuus]	11096	10962.4	11543.8	23207.5	24472.5	12884.2	24919.3	16180.9	18880.7	11200.7	20188.1	19993.6	0.554818	0.560214	1.00973	-0.849913	-0.835949	0.0139636
XP_022026572.1	1	1	7.89	0.310502	2.14685	Medium	Low	XP_022026572.1 receptor protein kinase CLAVATA1-like isoform X1 [Helianthus annuus]	28949.5	28703	66383.9	70306.9	116773	36479	42458.3	13893.4	47781.8	41345.5	74519.7	34711.1	0.554827	1.19113	2.14685	-0.849891	0.252332	1.10222
KVI01535.1	1	1	6.98	0.0763913	2.50776	Low	High	KVI01535.1 Concanavalin A-like lectin/glucanase, subgroup [Cynara cardunculus var. scolymus]	45379.5	57969.5	49963.5	89635.1	118035	68242.6	187979	133052	63438.9	51104.2	91970.9	128157	0.555656	0.398763	0.717644	-0.847737	-1.3264	-0.47866
KVH88911.1	2	1	22.44	0.347512	1.79699	Medium	High	KVH88911.1 Glycoside hydrolase, catalytic domain-containing protein, partial [Cynara cardunculus var. scolymus]	20989.2	7588.06	23815.1	27471.9	34859.3	31817.3	17096.4	4731.29	32662.8	17464.1	31382.9	18163.5	0.556485	0.961494	1.7278	-0.845584	-0.0566505	0.788934
OTG33007.1	1	1	7.73	0.102881	1.85497	Low	High	OTG33007.1 hypothetical protein HannXRQ_Chr03g0092821 [Helianthus annuus]	45030.1	53420.8	55733.8	61382.6	128854	86778.3	94716	62788	128504	51394.9	92338.4	95336	0.556593	0.539092	0.968558	-0.845306	-0.891396	-0.0460902
KVH89571.1	2	1	21.44	0.402566	1.79245	Medium	High	KVH89571.1 CRA domain-containing protein [Cynara cardunculus var. scolymus]	1266.31	1000.99	1826.8	1694.03	4276.75	1367.68	1736.71	1412.47	2103.67	1364.7	2446.15	1750.95	0.557896	0.779405	1.39704	-0.841932	-0.359554	0.482378
KVI00655.1	1	1	7.32	0.892279	1.79172	Medium	High	KVI00655.1 Homeobox, conserved site-containing protein [Cynara cardunculus var. scolymus]	6369.29	6878.96	9368.41	4624.25	29716.4	6181.99	11425.8	3965.42	20606.4	7538.89	13507.6	11999.2	0.558123	0.628282	1.12571	-0.841344	-0.670515	0.170829
OTG32784.1	1	1	11.39	0.275859	2.13375	Medium	Low	OTG32784.1 putative START-like domain, Bet v I type allergen [Helianthus annuus]	20156.4	19151.1	23052.1	15680.2	48751	47010	16749.7	7783.08	27695.1	20786.6	37147	17409.3	0.559575	1.19399	2.13375	-0.837597	0.255795	1.09339
KVI10458.1	3	1	29.89	0.857568	1.78087	Medium	High	KVI10458.1 hypothetical protein Ccrd_011110 [Cynara cardunculus var. scolymus]	93.3782	171.571	287.905	110.068	146.878	727.614	227.192	156.578	205.65	184.285	328.187	196.474	0.561523	0.937961	1.67039	-0.832582	-0.0924003	0.740182
XP_021991107.1	1	1	7.02	0.276602	3.63092	Low	High	XP_021991107.1 uncharacterized protein LOC110887849 [Helianthus annuus]	37746.8	55082.3	45231	129822	89892.5	26027.6	252777	44804.5	203704	46020	81913.9	167095	0.56181	0.275412	0.490223	-0.831846	-1.86033	-1.02849
KVH94860.1	1	1	8.15	0.611101	1.77692	Medium	High	KVH94860.1 Apple-like protein [Cynara cardunculus var. scolymus]	6362.26	6339.07	13410.1	15997.2	23126.9	7273.83	11500.7	565.717	20360.4	8703.81	15466	10808.9	0.562771	0.805241	1.43085	-0.82938	-0.312507	0.516872
OTG22728.1	1	1	6.12	0.233535	1.77615	Medium	High	OTG22728.1 putative transcription factor, SBP-box [Helianthus annuus]	1934.19	2432.23	1719.64	3379.03	4248.36	3182.38	4579.3	1514.47	4148.8	2028.69	3603.26	3414.19	0.563015	0.594193	1.05538	-0.828754	-0.750997	0.0777577
KVI06187.1	8	1	122.41	0.516066	1.77588	Medium	High	KVI06187.1 hypothetical protein Ccrd_015454 [Cynara cardunculus var. scolymus]	32973.8	28285.8	30988.8	24590.6	91606.2	47625.1	47038	13972.8	38475.5	30749.4	54607.3	33162.1	0.563101	0.927246	1.64668	-0.828534	-0.108975	0.719558
OTG17770.1	2	1	19.76	0.0985559	1.77439	Low	High	OTG17770.1 putative alcohol dehydrogenase superfamily, zinc-type, GroES-like, NAD(P)-binding domain protein [Helianthus annuus]	10283.3	6200.15	9609.34	15407.2	19159.4	11688.4	10161.8	21294	14842.9	8697.58	15418.3	15432.9	0.564107	0.563574	0.999054	-0.825958	-0.827324	-0.00136542
OTF98077.1	3	2	69.15	0.156153	1.96054	Medium	Low	OTF98077.1 putative serine carboxypeptidase S28 family protein [Helianthus annuus]	30056.6	18133.6	42254.6	55174.1	61164.1	43928.7	40484.4	12219.6	29042.2	30148.2	53422.3	27248.8	0.564339	1.10641	1.96054	-0.825367	0.145884	0.971251
KVI06247.1	1	1	7.62	0.0635331	1.76853	Medium	High	KVI06247.1 Concanavalin A-like lectin/glucanase, subgroup [Cynara cardunculus var. scolymus]	3340.86	2747.65	4488.81	6017.56	6362.59	6326.11	3323.75	6220.06	5625.49	3525.77	6235.42	5056.43	0.565443	0.697285	1.23317	-0.822548	-0.52018	0.302367
OTG30393.1	1	1	7.5	0.114358	2.5951	Low	High	OTG30393.1 hypothetical protein HannXRQ_Chr03g0063991 [Helianthus annuus]	867.506	2130.38	2165.88	1868.83	2919.23	4330.32	2802.5	3691.07	6906.93	1721.25	3039.46	4466.83	0.566303	0.385341	0.680451	-0.820355	-1.37579	-0.555437
OTG35924.1	1	1	7.86	0.531861	1.76512	Medium	High	OTG35924.1 putative leucine-rich repeat domain, L domain-like protein [Helianthus annuus]	25258	11228.9	28501.3	25449.5	57560.4	31701.7	45621.1	8022.02	29391.1	21662.7	38237.2	27678.1	0.566534	0.782667	1.3815	-0.819765	-0.35353	0.466235
OTG38442.1	1	1	18.6	0.312937	1.76364	Medium	High	OTG38442.1 putative phosphorylase superfamily protein [Helianthus annuus]	529521	112067	483593	374284	1.01724e+06	592891	734833	611530	538618	375060	661472	628327	0.567008	0.596919	1.05275	-0.818558	-0.744393	0.0741652
OTG29265.1	2	1	7.93	0.477624	1.76176	Medium	High	OTG29265.1 putative P-loop containing nucleoside triphosphate hydrolases superfamily protein [Helianthus annuus]	2727.51	835.513	2101.28	3506.72	2825.59	3646.85	4343.72	578.636	2352.55	1888.1	3326.39	2424.97	0.567613	0.778607	1.37172	-0.817021	-0.361032	0.455989
OTG37018.1	3	3	42.19	0.322174	1.82941	Medium	Low	OTG37018.1 putative serine carboxypeptidase 1 [Helianthus annuus]	10160.5	5389.38	27775.3	24826.2	26264.1	25106.6	8166.28	4325.57	29159.2	14441.7	25399	13883.7	0.568594	1.04019	1.82941	-0.814529	0.0568499	0.871379
OTF87170.1	4	4	82.55	0.383869	1.75843	Medium	High	OTF87170.1 putative light-induced protein [Helianthus annuus]	22101.1	7263.32	28240.8	20180.8	53748.1	27365.9	19239.2	13309.2	25457.1	19201.7	33765	19335.2	0.568688	0.993098	1.7463	-0.814291	-0.00999205	0.804299
KVH98322.1	1	1	6.09	0.486695	4.55427	Low	High	KVH98322.1 hypothetical protein Ccrd_023470 [Cynara cardunculus var. scolymus]	1162.19	841.684	1879.87	2480.99	1553.19	2767.08	831.464	2339.21	14516.9	1294.58	2267.09	5895.87	0.571033	0.219574	0.384521	-0.808354	-2.18722	-1.37887
XP_021991139.1	1	1	8.86	0.429801	1.75075	Medium	High	XP_021991139.1 putative F-box only protein 9 [Helianthus annuus]	2038.95	2861.56	3978.92	3496.33	5352.72	6696.65	8444.63	1916.61	5048.47	2959.81	5181.9	5136.57	0.571183	0.576223	1.00882	-0.807976	-0.7953	0.0126754
KVH92002.1	1	1	15.07	0.860717	2.0462	Low	High	KVH92002.1 Glutathione S-transferase/chloride channel, C-terminal [Cynara cardunculus var. scolymus]	14811.1	4016.83	7752.12	18616.1	23684.3	4221.42	22145	2029.98	30213.2	8860.02	15507.3	18129.4	0.571346	0.48871	0.855366	-0.807564	-1.03295	-0.225386
BAH79097.1	2	2	27.3	0.357296	2.75701	Medium	Low	BAH79097.1 cysteine protease, partial [Lactuca sativa]	1890.71	1184.68	4048.2	3127.17	3217.3	6116.71	1527.98	2259.91	2991.84	2374.53	4153.73	2259.91	0.571663	1.05072	1.83801	-0.806763	0.0713792	0.878142
KVH90786.1	4	1	71.34	0.330139	2.16327	Medium	Low	KVH90786.1 D-galactoside/L-rhamnose binding SUEL lectin domain-containing protein [Cynara cardunculus var. scolymus]	1250.77	1567.36	2655.36	2357.49	5811.77	1402.65	518.413	313.096	3593.24	1824.5	3190.64	1474.92	0.571829	1.23702	2.16327	-0.806344	0.306868	1.11321
KVH94795.1	1	1	9.27	0.470366	1.74771	Medium	High	KVH94795.1 EGF-like calcium-binding [Cynara cardunculus var. scolymus]	415003	205740	124345	453274	544428	304499	389085	80423.6	426787	248363	434067	298765	0.572177	0.831297	1.45287	-0.805468	-0.266564	0.538904
OTF91032.1	1	1	8.62	0.558974	1.74628	Medium	High	OTF91032.1 putative myb/SANT-like domain, Harbinger transposase-derived nuclease domain protein [Helianthus annuus]	6756.35	4411.99	9316.86	4407.16	16752.1	14613.6	10114.7	7452.95	7075.34	6828.4	11924.3	8214.32	0.572647	0.83128	1.45165	-0.804283	-0.266593	0.53769
KVH91352.1	1	1	9.84	0.0277902	2.2505	Low	High	KVH91352.1 Inosine/uridine-preferring nucleoside hydrolase [Cynara cardunculus var. scolymus]	13030	11887.1	11136.1	17535	25092.5	20283	24310.6	39185.9	17641	12017.7	20970.1	27045.8	0.573088	0.444346	0.775355	-0.803172	-1.17024	-0.367071
OTG29840.1	1	1	18.25	0.698881	1.74472	Medium	High	OTG29840.1 putative glucose-6-phosphate dehydrogenase [Helianthus annuus]	48785.4	35163	61034.6	44508.9	162568	45877	40597.7	38794.4	99011	48327.7	84318.1	59467.7	0.573159	0.812671	1.41788	-0.802993	-0.299257	0.503736
OTF91722.1	1	1	8	0.314718	1.74326	Medium	High	OTF91722.1 putative RNA-binding, CRM domain-containing protein [Helianthus annuus]	1506.91	655.533	1206.69	1131.81	2003.1	2738.36	1338.6	1141.14	2119.94	1123.04	1957.75	1533.23	0.573639	0.73247	1.27688	-0.801785	-0.449158	0.352628
XP_022007463.1	1	1	6.71	0.0112155	4.29683	Medium	Low	XP_022007463.1 uncharacterized protein LOC110906666 [Helianthus annuus]	78421.2	84693.8	81117.5	99638.5	209452	115766	58405.3	19280	21191.4	81410.8	141619	32958.9	0.57486	2.47007	4.29683	-0.798718	1.30455	2.10327
XP_022026115.1	1	1	7.08	0.47269	1.73477	Low	High	XP_022026115.1 uncharacterized protein LOC110926720, partial [Helianthus annuus]	22279.6	3393.96	27328.5	44902.3	31928	14972.3	29163	13552.9	49230.7	17667.4	30600.9	30648.9	0.577349	0.576445	0.998435	-0.792485	-0.794746	-0.0022602
XP_022032175.1	1	1	6.53	0.15601	1.73197	Medium	High	XP_022032175.1 F-box/kelch-repeat protein SKIP11-like [Helianthus annuus]	10223.5	9854.2	11691.6	15415.5	27038.2	12569.7	20513.9	11582.5	18236.7	10589.7	18341.2	16777.7	0.577376	0.631181	1.09319	-0.792417	-0.663875	0.128542
AGZ15279.1	1	1	8.61	0.293048	1.7312	Medium	High	AGZ15279.1 putative Avr9 elicitor response protein, partial [Taraxacum brevicorniculatum]	6592.57	2891.35	8226.85	10862.8	12078	7720.17	3755.73	4278.63	11179.6	5903.59	10220.3	6404.66	0.577633	0.921764	1.59576	-0.791775	-0.117531	0.674244
KVH94921.1	1	1	8.94	0.310352	2.11219	Low	High	KVH94921.1 hypothetical protein Ccrd_003010 [Cynara cardunculus var. scolymus]	36459.8	30977.5	23192.8	32804	74295	49499.7	117333	35580.8	38513.8	30210	52199.6	63809.3	0.578741	0.473443	0.818056	-0.78901	-1.07874	-0.289728
OTF93609.1	1	1	6.75	0.058786	9.5908	Low	High	OTF93609.1 putative protein kinase superfamily protein [Helianthus annuus]	46.6624	153.955	906.104	663.077	207.899	1038.89	6399.46	3011.01	1203.88	368.907	636.623	3538.11	0.579475	0.104267	0.179933	-0.787182	-3.26165	-2.47447
KVI12214.1	2	1	15.83	0.279034	1.72562	Medium	High	KVI12214.1 Protein kinase, ATP binding site-containing protein [Cynara cardunculus var. scolymus]	77456.7	37672.4	94183.5	81399	166732	113063	130268	64996	136350	69770.9	120398	110538	0.579502	0.631193	1.0892	-0.787115	-0.663847	0.123269
KVI03844.1	1	1	6.56	0.237701	2.31453	Medium	Low	KVI03844.1 Aromatic-L-amino-acid decarboxylase [Cynara cardunculus var. scolymus]	393988	335134	588709	543731	636099	1.0935e+06	306301	56845.9	619052	439277	757776	327399	0.579693	1.34172	2.31453	-0.78664	0.42408	1.21072
ARH09091.1	1	1	12.34	0.353179	1.97773	Medium	Low	ARH09091.1 ribosomal protein L33 (chloroplast) [Diplostephium mutiscuanum]	179612	69093.4	152294	184385	380683	126056	98553.2	57929.5	192971	133666	230375	116484	0.580212	1.1475	1.97773	-0.785347	0.198499	0.983846
KVH99799.1	1	1	9.01	0.104697	3.39064	Medium	Low	KVH99799.1 Bicarbonate transporter, eukaryotic [Cynara cardunculus var. scolymus]	15033.2	15821.4	25649.5	21619.9	14644.6	61069.4	6785.67	6797.35	15123.7	18834.7	32444.7	9568.9	0.580518	1.96832	3.39064	-0.784588	0.976967	1.76156
KVI03121.1	2	1	29.19	0.0419125	1.73836	Medium	Low	KVI03121.1 Lipase/lipooxygenase, PLAT/LH2 [Cynara cardunculus var. scolymus]	111857	70279.5	107023	116871	185859	195332	102746	87946.4	95819.9	96386.4	166020	95504.2	0.58057	1.00924	1.73836	-0.784458	0.0132653	0.797724
KVH94896.1	1	1	7.3	0.202293	5.18109	Low	High	KVH94896.1 hypothetical protein Ccrd_003044 [Cynara cardunculus var. scolymus]	3132.82	1887.93	2183.71	3620.9	4015.63	4771.89	2563.19	6602.85	28160.8	2401.48	4136.14	12442.3	0.58061	0.19301	0.332426	-0.784359	-2.37325	-1.5889
KVI01063.1	1	1	19.06	0.203657	1.72225	Low	High	KVI01063.1 hypothetical protein Ccrd_020672 [Cynara cardunculus var. scolymus]	83084.4	67196.4	71923.4	89982.4	192157	99618.2	191113	97657.2	93921.1	74068.1	127252	127564	0.582056	0.580636	0.997561	-0.78077	-0.784293	-0.00352276
KVI02883.1	6	2	101	0.408569	2.67097	Medium	Low	KVI02883.1 hypothetical protein Ccrd_018836, partial [Cynara cardunculus var. scolymus]	11526.3	16489.9	75670.7	50416	105386	22039.7	23067.4	24004.5	19511.3	34562.3	59280.7	22194.4	0.583028	1.55725	2.67097	-0.778362	0.639004	1.41737
AIB03743.1	1	1	9.94	0.0924094	2.70326	Medium	Low	AIB03743.1 RNA polymerase beta' subunit (chloroplast) [Centaurea diffusa]	4273.35	3362.26	1625.71	4881.95	6313.56	4688.31	3830.96	1181.31	863.534	3087.1	5294.61	1958.6	0.583066	1.57618	2.70326	-0.778269	0.65643	1.4347
KVH91189.1	1	1	8.14	0.168518	2.9821	Medium	Low	KVH91189.1 PAP/25A-associated [Cynara cardunculus var. scolymus]	103125	102525	311083	475548	303042	107323	8508.72	1820.11	286748	172244	295304	99025.6	0.583276	1.73939	2.9821	-0.777749	0.79858	1.57633
KVI00029.1	1	1	6.04	0.277459	1.946	Medium	Low	KVI00029.1 Nucleotide-binding, alpha-beta plait [Cynara cardunculus var. scolymus]	162910	214891	126390	450138	158693	253664	104234	77463.8	261517	168064	287498	147738	0.584574	1.13758	1.946	-0.774543	0.185969	0.960512
KVI06000.1	1	1	6.67	0.515648	1.82117	Medium	Low	KVI06000.1 hypothetical protein Ccrd_015675 [Cynara cardunculus var. scolymus]	2902.58	2191.04	847.212	5708.15	1527.28	2906.14	920.942	2215.21	2432.55	1980.28	3380.52	1856.23	0.585791	1.06683	1.82117	-0.771542	0.0933255	0.864867
KVI02324.1	2	1	19.75	0.583678	2.57754	Medium	Low	KVI02324.1 AAA+ ATPase domain-containing protein [Cynara cardunculus var. scolymus]	9663.59	17197	15943	40407.3	28467.9	4065.07	3386.3	11337.1	13574.9	14267.8	24313.4	9432.79	0.58683	1.51258	2.57754	-0.768986	0.59701	1.366
KVI09651.1	1	1	6.3	0.434501	1.70053	Medium	High	KVI09651.1 DNA glycosylase [Cynara cardunculus var. scolymus]	6224.23	2949.84	5552.45	7115.66	11422.6	6504.63	5368.55	2020.93	10020.7	4908.84	8347.64	5803.38	0.588052	0.845859	1.43841	-0.765985	-0.241511	0.524474
KVH92264.1	1	1	7.59	0.321196	1.7678	Medium	Low	KVH92264.1 Ankyrin repeat-containing protein [Cynara cardunculus var. scolymus]	17825.4	21166.7	11946.9	19893.7	18736.7	47989.7	11617	12277.2	25104.4	16979.7	28873.3	16332.9	0.588075	1.0396	1.7678	-0.765929	0.0560301	0.821959
OTG31496.1	7	3	139.51	0.332406	1.69995	Medium	High	OTG31496.1 putative histone H2A [Helianthus annuus]	25559.7	24566.4	24866.4	46469.1	34637.3	46377	50981.7	12366.8	30442.9	24997.5	42494.5	31263.8	0.588253	0.799567	1.35922	-0.76549	-0.322709	0.442782
KVG62197.1	1	1	7.72	0.384494	1.69924	Medium	High	KVG62197.1 Sec1-like protein [Cynara cardunculus var. scolymus]	8160.28	6956.24	1614.33	8293.59	10419.1	9717.08	14011.9	5910.04	4842.8	5576.95	9476.59	8254.93	0.588498	0.67559	1.14799	-0.764892	-0.565779	0.199112
OTG08604.1	1	1	7.52	0.0606465	2.29346	Low	High	OTG08604.1 putative peptidase S8, subtilisin-related protein [Helianthus annuus]	15189.1	21152.3	25308.3	27993.5	29193.6	47482.3	69679.5	39989	31722.8	20549.9	34889.8	47130.4	0.588994	0.436022	0.740282	-0.763675	-1.19753	-0.433854
XP_021990866.1	1	1	9.67	0.0593378	8.11787	Low	High	XP_021990866.1 uncharacterized protein LOC110887596 [Helianthus annuus]	242.296	439.863	93.3146	220.868	933.925	159.635	1322.12	794.606	4178.46	258.491	438.143	2098.4	0.58997	0.123185	0.208799	-0.761286	-3.0211	-2.25981
KVI09985.1	1	1	7.19	0.427308	4.65212	Low	High	KVI09985.1 NAD(P)-binding domain-containing protein [Cynara cardunculus var. scolymus]	1040.16	1218.39	1917.72	3622.96	1263.97	2189.65	1289.42	2155.12	15984	1392.09	2358.86	6476.17	0.590154	0.214956	0.364237	-0.760838	-2.21789	-1.45705
KVH91630.1	1	1	7.91	0.240112	1.69392	Medium	High	KVH91630.1 Glutathione peroxidase [Cynara cardunculus var. scolymus]	2540.36	4001.82	2820.31	5613.95	6377.76	3867.59	5869.09	2078.21	2720.4	3120.83	5286.44	3555.9	0.590347	0.877648	1.48667	-0.760366	-0.188285	0.57208
OTG22941.1	1	1	6.08	0.0766086	2.37837	Low	High	OTG22941.1 putative core-2/I-branching beta-1,6-N-acetylglucosaminyltransferase family protein [Helianthus annuus]	1412.47	968.806	1946.69	2922.81	1181.53	3216.93	3139.56	3130.54	4023.42	1442.66	2440.42	3431.17	0.59115	0.420456	0.71125	-0.758403	-1.24997	-0.49157
OTG20737.1	1	1	14.87	0.72398	2.1275	Low	High	OTG20737.1 putative START-like domain-containing protein [Helianthus annuus]	162995	35885.4	73065.8	22961.6	418204	18199.2	318031	32614.3	227920	90648.6	153122	192855	0.592004	0.470035	0.793973	-0.756321	-1.08916	-0.332838
XP_021992092.1	1	1	7.96	0.584412	1.68868	Medium	High	XP_021992092.1 probable serine/threonine-protein kinase PBL8 [Helianthus annuus]	6924.59	4135.88	6628.04	5025.84	19223.3	5621.17	7346.6	6556.34	14798.6	5896.17	9956.77	9567.19	0.592177	0.61629	1.04072	-0.7559	-0.698318	0.0575819
XP_022041493.1	1	1	7.75	0.464336	1.68569	Medium	High	XP_022041493.1 proteasome subunit alpha type-1-B-like [Helianthus annuus]	15222.5	24978.5	42378.9	30031.6	74006.4	35166	51330.6	19707.7	29278	27526.6	46401.4	33438.8	0.593229	0.823195	1.38765	-0.753339	-0.280693	0.472646
XP_021982224.1	1	1	6.27	0.238453	1.68335	Medium	High	XP_021982224.1 pre-mRNA 3'-end-processing factor FIP1-like [Helianthus annuus]	18642.8	9567.44	19316.8	25416.4	36536.6	18051.5	18316.5	14267.4	23895.7	15842.3	26668.1	18826.5	0.594055	0.841491	1.41652	-0.751332	-0.24898	0.502352
KVH92946.1	3	1	39.22	0.180602	1.68282	Medium	High	KVH92946.1 Chaperonin Cpn60 [Cynara cardunculus var. scolymus]	2013.2	2025.82	2859.07	3030.37	2549.98	6027.85	2900.97	4057.55	4184.65	2299.36	3869.4	3714.39	0.594242	0.619041	1.04173	-0.750877	-0.691893	0.0589845
KVH95504.1	2	2	27.54	0.771675	2.37162	Low	High	KVH95504.1 Bifunctional inhibitor/plant lipid transfer protein/seed storage helical domain-containing protein [Cynara cardunculus var. scolymus]	26740.8	8199.24	16755.7	30002.6	39831.2	17140.8	101335	5447.72	15820.2	17231.9	28991.5	40867.6	0.594378	0.421652	0.709401	-0.750548	-1.24587	-0.495326
KVI00385.1	1	1	9.35	0.19846	1.98844	Low	High	KVI00385.1 Cyanate hydratase [Cynara cardunculus var. scolymus]	16828.9	20794	25063.6	41412.6	34816.7	29188.7	20928.7	69078.1	34641.9	20895.5	35139.3	41549.6	0.594647	0.502906	0.845721	-0.749893	-0.99164	-0.241746
KVH95459.1	1	1	8.16	0.282168	1.68157	Medium	High	KVH95459.1 Generative cell specific-1, HAP2-GCS1 [Cynara cardunculus var. scolymus]	2520.16	1956.22	9791.38	9485.18	8032.34	6474.75	3737.05	5693.47	6276.17	4755.92	7997.42	5235.56	0.594681	0.908387	1.52752	-0.749811	-0.138621	0.61119
OTG18858.1	3	1	50.83	0.0925471	2.84251	Low	High	OTG18858.1 putative superoxide dismutase, copper/zinc binding domain-containing protein [Helianthus annuus]	632.547	945.801	711.998	1155.88	1806.52	880.245	3356.91	2155.77	997.648	763.449	1280.88	2170.11	0.596034	0.351802	0.590238	-0.746532	-1.50716	-0.760631
OTF95366.1	1	1	10.88	0.310523	1.90017	Medium	Low	OTF95366.1 putative proline-rich receptor-like protein kinase PERK3 [Helianthus annuus]	1.26644e+06	1.1104e+06	1.8866e+06	1.86789e+06	2.18867e+06	3.09364e+06	1.49013e+06	260201	2.01259e+06	1.42115e+06	2.3834e+06	1.25431e+06	0.596268	1.13301	1.90017	-0.745967	0.180163	0.92613
OTG30778.1	1	1	8.72	0.555506	1.67161	Medium	High	OTG30778.1 putative peptidase S10, serine carboxypeptidase, Alpha/Beta hydrolase fold protein [Helianthus annuus]	1232.24	1251.71	3109.21	2057.09	5337.5	1955.01	5239.27	2519.26	1387.55	1864.39	3116.53	3048.69	0.598224	0.611536	1.02225	-0.741242	-0.70949	0.0317513
ABD15097.1	1	1	9.09	0.0530764	1.67057	Medium	High	ABD15097.1 putative heme-binding cytochrome P450 [Artemisia annua]	9879.47	10024.2	11276	19347.8	13337.7	19402.6	13253.9	10018.8	16438.8	10393.2	17362.7	13237.2	0.598596	0.785157	1.31166	-0.740345	-0.348947	0.391397
KVI10078.1	1	1	7.99	0.561502	1.66979	Medium	High	KVI10078.1 RNA polymerase sigma-70 [Cynara cardunculus var. scolymus]	1399	1146.75	3285.82	5776.53	1518.8	2442.17	1471.32	2686.04	1758.84	1943.86	3245.83	1972.07	0.598877	0.985695	1.6459	-0.739667	-0.0207867	0.718881
KVH98659.1	1	1	10.68	0.65122	1.6695	Medium	High	KVH98659.1 Alcohol dehydrogenase, C-terminal [Cynara cardunculus var. scolymus]	1428.2	730.556	878.225	1691.87	829.936	2548.44	1129.12	413.999	2327.08	1012.33	1690.08	1290.07	0.59898	0.784709	1.31007	-0.73942	-0.349771	0.389649
KVI09458.1	1	1	24.56	0.332703	1.72715	Medium	High	KVI09458.1 Protein of unknown function DUF538 [Cynara cardunculus var. scolymus]	88582.7	25630.3	106461	86837.3	127839	152680	65245.4	44598	102851	73558.1	122452	70898.3	0.60071	1.03752	1.72715	-0.73526	0.053133	0.788393
KVH94798.1	1	1	8.45	0.0297232	2.79338	Low	High	KVH94798.1 Chlorophyll A-B binding protein [Cynara cardunculus var. scolymus]	1198.64	1495.42	1174.91	1924.97	2968.14	1546.66	4974.44	3725.72	2107.36	1289.66	2146.59	3602.5	0.600793	0.357989	0.595861	-0.73506	-1.48201	-0.746953
KVI04815.1	5	3	88.9	0.539037	1.6624	Medium	High	KVI04815.1 hypothetical protein Ccrd_016862 [Cynara cardunculus var. scolymus]	94807.7	101071	130456	145966	284845	111686	241289	116762	70154	108778	180832	142735	0.60154	0.762097	1.26691	-0.733267	-0.391953	0.341314
OTG04660.1	1	1	6.83	0.489662	1.96687	Medium	Low	OTG04660.1 hypothetical protein HannXRQ_Chr12g0364791 [Helianthus annuus]	34958.2	48937.2	56154.4	19927.1	91338.9	121509	68742.1	379.528	49226.5	46683.3	77591.6	39449.4	0.601654	1.18337	1.96687	-0.732995	0.242904	0.975899
XP_021993209.1	1	1	9.32	0.353835	1.95541	Medium	Low	XP_021993209.1 zinc finger MYM-type protein 1-like [Helianthus annuus]	1389.96	4794.71	4940.18	10620.9	6010.16	1811.61	346.758	333.041	8751.82	3708.29	6147.56	3143.87	0.603212	1.17953	1.95541	-0.729262	0.23821	0.967472
KVI06028.1	4	4	86.89	0.453114	1.65657	Medium	High	KVI06028.1 Embryo-specific 3 [Cynara cardunculus var. scolymus]	48772.2	15026.8	33247.3	78623.6	50613	31527.6	62770.6	25811.5	45599.3	32348.8	53588.1	44727.1	0.603656	0.723247	1.19811	-0.728201	-0.467439	0.260762
OTG08971.1	1	1	7.85	0.882473	1.80025	Low	High	OTG08971.1 putative TRAF-like protein [Helianthus annuus]	8563.86	32462.6	791.952	2466.41	48494.6	18205.5	65188.6	9199.85	895.126	13939.5	23055.5	25094.5	0.604606	0.555479	0.918746	-0.725933	-0.848195	-0.122262
KVI05868.1	2	2	15.99	0.506249	1.653	Medium	High	KVI05868.1 AAA+ ATPase domain-containing protein [Cynara cardunculus var. scolymus]	550414	144826	928844	710466	1.34481e+06	629331	810901	261465	731562	541361	894870	601309	0.604961	0.900304	1.4882	-0.725086	-0.151516	0.57357
OTF90264.1	2	2	29.4	0.120822	4.55711	Low	High	OTF90264.1 putative ribosomal protein L22/L17 [Helianthus annuus]	22301.8	23206.7	11982.5	56607.9	28739	9526.56	111755	29780.6	120457	19163.6	31624.5	87330.8	0.605975	0.219437	0.362123	-0.72267	-2.18812	-1.46545
OTG25096.1	1	1	6.48	0.991128	1.64856	Medium	High	OTG25096.1 putative development/cell death domain-containing protein [Helianthus annuus]	8250.3	3949.4	1720	989.685	18060.4	3897.39	10056.8	3079.7	2536.29	4639.9	7649.17	5224.26	0.606588	0.888145	1.46416	-0.72121	-0.171133	0.550077
KVH92832.1	1	1	7.65	0.280352	1.64817	Medium	High	KVH92832.1 hypothetical protein Ccrd_005151 [Cynara cardunculus var. scolymus]	1.15467e+06	642211	1.28191e+06	1.35473e+06	2.40047e+06	1.31918e+06	1.3598e+06	1.8549e+06	951589	1.02626e+06	1.69146e+06	1.38876e+06	0.606733	0.738977	1.21796	-0.720866	-0.436399	0.284467
XP_022007649.1	1	1	8.99	0.313593	1.64723	Medium	High	XP_022007649.1 uncharacterized protein LOC110906897 [Helianthus annuus]	3542.25	1636.51	3701.76	3836.97	7401.58	3389.67	3718.65	3171.61	3863.23	2960.17	4876.07	3584.49	0.607081	0.825827	1.36032	-0.720039	-0.276088	0.443951
XP_022032953.1	1	1	8.38	0.92209	1.64511	Medium	High	XP_022032953.1 uncharacterized protein LOC110934068 [Helianthus annuus]	35225.2	21007.7	24613.1	21064.2	96391.6	15545.1	29340.7	18102.6	35608.6	26948.7	44333.6	27683.9	0.607861	0.973442	1.60142	-0.718186	-0.0388325	0.679353
OTF86235.1	1	1	6.42	0.602191	2.11361	Low	High	OTF86235.1 putative NAC domain-containing protein [Helianthus annuus]	17364.6	25811.5	6164.87	58157.3	15053.6	7945.52	47459.3	45165.6	11662.5	16447	27052.1	34762.5	0.607973	0.473125	0.7782	-0.71792	-1.07971	-0.361788
KVD98111.1	1	1	16.08	0.348324	1.91775	Medium	Low	KVD98111.1 hypothetical protein Ccrd_024271, partial [Cynara cardunculus var. scolymus]	29603.5	13349.9	18928.7	17988.9	55757.3	28004.3	13565.3	10557.2	28934.8	20627.4	33916.9	17685.8	0.608174	1.16633	1.91775	-0.717444	0.22197	0.939414
XP_021995324.1	1	1	6.27	0.387609	1.64426	Medíum	High	XP_021995324.1 glutamate receptor 2.8-like [Helianthus annuus]	18725.8	20305.8	13698.1	26943.7	44578.6	15179.1	18774.6	25313.2	23768.2	17576.6	28900.4	22618.7	0.608177	0.777082	1.27772	-0.717438	-0.363861	0.353577
OTF88075.1	1	1	8.57	0.6968	1.64388	Medium	High	OTF88075.1 putative cytochrome P450 [Helianthus annuus]	45131.6	27146.6	63862.6	53695.4	115660	54443.2	63276.3	18050.1	133262	45380.2	74599.6	71529.4	0.608318	0.634427	1.04292	-0.717103	-0.656473	0.0606298
KVI04859.1	1	1	6.86	0.613183	1.64328	Medium	High	KVI04859.1 Yippee-like protein, partial [Cynara cardunculus var. scolymus]	18728.6	21517.3	66692.4	79294.5	74427.7	22007.7	52059.8	25235.9	63968.6	35646.1	58576.6	47088.1	0.608538	0.757009	1.24398	-0.716581	-0.401618	0.314963
OTF85387.1	3	2	27.51	0.605324	1.8751	Low	High	OTF85387.1 hypothetical protein HannXRQ_Chr17g0539391 [Helianthus annuus]	3943.14	3670.24	1559.78	2409.44	1481.92	11178.7	5150.61	8908.45	3141.55	3057.72	5023.35	5733.54	0.608701	0.533304	0.876134	-0.716194	-0.906971	-0.190776
OTF94398.1	1	1	6.79	0.0262566	6.05641	Low	High	OTF94398.1 putative peroxisomal adenine nucleotide carrier 2 [Helianthus annuus]	2703.39	1690.09	2578.52	5078.41	3530.76	2824.81	7208.36	28463.4	6553.52	2324	3811.33	14075.1	0.609761	0.165114	0.270785	-0.713684	-2.59846	-1.88478
KVI00058.1	1	1	7.84	0.174231	2.21233	Low	High	KVI00058.1 hypothetical protein Ccrd_021708 [Cynara cardunculus var. scolymus]	3015.72	3335.52	1244.16	4302.44	2665.78	5472.49	6508.85	3052.64	7242.03	2531.8	4146.91	5601.18	0.610528	0.452012	0.740363	-0.711871	-1.14557	-0.433695
OTF94580.1	6	6	85.02	0.020398	1.70681	Low	High	OTF94580.1 putative O-methyltransferase, family 3, S-adenosyl-L-methionine-dependent methyltransferase [Helianthus annuus]	12186.2	14655.2	10885.3	26180.7	20204.5	15402	20399.3	20643.8	23349.1	12575.5	20595.7	21464.1	0.61059	0.585888	0.959544	-0.711725	-0.771304	-0.0595786
KVH87521.1	1	1	6.35	0.478925	1.80812	Medium	Low	KVH87521.1 Pentatricopeptide repeat-containing protein [Cynara cardunculus var. scolymus]	4796.62	8188.28	9594.44	13367.7	17946.9	5608.18	8027.6	1582.73	10810.2	7526.45	12307.6	6806.84	0.611529	1.10572	1.80812	-0.709506	0.144984	0.85449
KVI03699.1	4	1	60.53	0.376932	1.63445	Medium	High	KVI03699.1 hypothetical protein Ccrd_017982, partial [Cynara cardunculus var. scolymus]	8993.17	14105.9	14442.4	16547.9	22989.2	21822.7	24954.7	16942.4	7126.2	12513.8	20453.2	16341.1	0.611827	0.765788	1.25164	-0.708805	-0.384983	0.323823
OTG28448.1	1	1	8.03	0.539658	1.63327	Medium	High	OTG28448.1 putative protein kinase-like domain, Mitogen-activated protein (MAP) kinase kinase kinase Ssk2/Ssk22 [Helianthus annuus]	2201.22	548.554	5323.94	2647.22	5502.53	5036.8	2885.71	614.317	4726.87	2691.24	4395.52	2742.3	0.612269	0.981381	1.60286	-0.707763	-0.027115	0.680648
KVH96509.1	1	1	9.57	0.363027	1.63249	Medíum	High	KVH96509.1 hypothetical protein Ccrd_001408 [Cynara cardunculus var. scolymus]	5632.35	5115.8	9697.12	12768.5	13418.5	7189.65	7085.34	5423.2	13538.8	6815.09	11125.5	8682.44	0.612563	0.784928	1.28138	-0.70707	-0.349367	0.357703
KVH88590.1	1	1	7.31	0.333485	1.63241	Medium	High	KVH88590.1 DNA helicase, ATP-dependent, RecQ type [Cynara cardunculus var. scolymus]	58757.7	29916.2	65817.4	56331	122862	72999.4	101860	48085.6	90709.7	51497.1	84064.2	80218.5	0.612593	0.64196	1.04794	-0.707	-0.639444	0.0675562
OTG38462.1	1	1	10.56	0.0270574	2.80468	Low	High	OTG38462.1 putative NB-ARC [Helianthus annuus]	5962.42	9316.29	4960.08	12269	11404.2	9346.67	19416	26405.2	10942	6746.26	11006.6	18921.1	0.612928	0.356547	0.581712	-0.706211	-1.48783	-0.781623
AKQ52839.1	1	1	7.71	0.514992	2.13621	Medium	Low	AKQ52839.1 chalcone synthase 2, partial [Silybum marianum]	41672.2	57543.5	64599.9	141100	100931	25201	23398.9	41033.8	60663.4	54605.2	89077.1	41698.7	0.61301	1.30952	2.13621	-0.706016	0.389036	1.09505
OTF94138.1	1	1	9.01	0.0775025	1.63123	Medium	High	OTF94138.1 putative zinc finger, CCHC-type, Plus-3 domain, RNA polymerase-associated protein Rtf1 [Helianthus annuus]	13981.5	18083.6	17599.1	24927.4	36389.8	19696.4	24015.3	33626.4	22570	16554.7	27004.5	26737.2	0.613035	0.619165	1.01	-0.705958	-0.691605	0.0143536
XP_021999385.1	1	1	7.57	0.264127	2.54299	Medium	Low	XP_021999385.1 uncharacterized protein LOC110896229 [Helianthus annuus]	4643.28	3406.29	4730.25	5817.2	10961.6	4050.7	3389.38	276.081	4525.48	4259.94	6943.16	2730.31	0.613545	1.56024	2.54299	-0.704758	0.641767	1.34653
KVI08589.1	4	1	51.63	0.189192	1.62902	Medium	High	KVI08589.1 Ran GTPase [Cynara cardunculus var. scolymus]	1884	1578.23	2681.86	2136.94	3715.03	4156.85	2152.77	2979.5	2413.45	2048.03	3336.27	2515.24	0.613867	0.814248	1.32642	-0.704002	-0.296461	0.407541
XP_022030984.1	1	1	7.3	0.0785938	2.78918	Low	High	XP_022030984.1 uncharacterized protein LOC110931923 [Helianthus annuus]	17207.7	13528.3	17819.4	16157.8	37776	25091.9	39490.8	71560.2	24378.8	16185.1	26341.9	45143.3	0.614425	0.358528	0.583518	-0.70269	-1.47984	-0.77715
KVH98484.1	1	1	6.77	0.476939	1.62502	Medium	High	KVH98484.1 Nucleic acid-binding, OB-fold [Cynara cardunculus var. scolymus]	2125.92	1729.17	3617.12	3876.27	5978.34	2287.92	3659.73	1872.48	4354.98	2490.74	4047.51	3295.73	0.615375	0.755747	1.22811	-0.700461	-0.404025	0.296436
KVI01632.1	1	1	7.36	0.827761	1.62463	Medium	High	KVI01632.1 hypothetical protein Ccrd_020092 [Cynara cardunculus var. scolymus]	3194.12	1055.49	2993.25	4042.68	6219.31	1505	5143.06	272.95	5315.58	2414.28	3922.33	3577.19	0.615523	0.67491	1.09648	-0.700115	-0.567233	0.132883
KVI09680.1	1	1	13.05	0.205593	117.942	Low	High	KVI09680.1 Kunitz inhibitor ST1-like protein [Cynara cardunculus var. scolymus]	222.592	150.491	96.5997	267.867	351.55	143.454	512.724	54571.2	311.613	156.561	254.29	18465.2	0.615679	0.00847872	0.0137713	-0.699751	-6.88194	-6.18219
KVI01279.1	2	1	40.3	0.653691	1.61908	Medium	High	KVI01279.1 cytochrome b-c1 complex subunit 7, partial [Cynara cardunculus var. scolymus]	19901.6	19044.1	30273.5	25451.9	67289.2	19330.7	28451.3	19781.5	45189.9	23073.1	37357.3	31140.9	0.617633	0.740926	1.19962	-0.695178	-0.432599	0.262579
KVI05215.1	4	4	44.6	0.599693	1.98786	Low	High	KVI05215.1 Heat shock protein Hsp90 [Cynara cardunculus var. scolymus]	81746.3	53873.9	68386.7	168006	93408.9	68639.8	132446	39455.7	233635	68002.3	110018	135179	0.618101	0.503054	0.813871	-0.694086	-0.991214	-0.297128
OTG15249.1	2	1	20.82	0.167282	2.03757	Low	High	OTG15249.1 putative zinc finger, RING/FYVE/PHD-type [Helianthus annuus]	17541.9	12842.1	14561.5	24414.8	35541.2	12744	44178.2	23042.1	24359.2	14981.8	24233.4	30526.5	0.618232	0.490782	0.793847	-0.693779	-1.02685	-0.333068
XP_021974972.1	2	2	15.87	0.316669	1.61611	Medium	High	XP_021974972.1 putative disease resistance RPP13-like protein 2 [Helianthus annuus]	9079.93	3304.53	7307.58	7022.24	14075.6	10726.7	7167.48	5989.47	9205.29	6564.01	10608.2	7454.08	0.618771	0.880594	1.42313	-0.692523	-0.183452	0.509071
KVI06262.1	2	1	40.4	0.163194	2.60095	Low	High	KVI06262.1 Aldolase-type TIM barrel [Cynara cardunculus var. scolymus]	9063.67	26000	21297.2	32788.9	43698.6	14549.6	56527.6	63710.7	26353.5	18787	30345.7	48864	0.619098	0.384475	0.621024	-0.691761	-1.37904	-0.687279
KVG40999.1	1	1	9.57	0.0462085	4.19546	Low	High	KVG40999.1 Chalcone isomerase [Cynara cardunculus var. scolymus]	1112.86	1323.21	529.192	1266.82	1017.11	2504.14	3489.42	6903.67	2047.54	988.419	1596.02	4146.87	0.619301	0.238353	0.384874	-0.691287	-2.06883	-1.37754
KVI11856.1	1	1	6.33	0.145568	3.62634	Medium	Low	KVI11856.1 2-methoxy-6-polyprenyl-1,4-benzoquinol methylase domain-containing protein, partial [Cynara cardunculus var. scolymus]	2579.95	2394.93	8826.57	7619.06	11342.5	3319.31	692.192	1542.73	3909.26	4600.48	7426.96	2048.06	0.619429	2.24626	3.62634	-0.690988	1.16753	1.85851
KVI02697.1	1	1	8.26	0.0944809	1.78307	Low	High	KVI02697.1 Actin-binding FH2 [Cynara cardunculus var. scolymus]	79398.4	55723.6	107209	87973.3	144746	158266	180430	120945	130719	80777.2	130328	144031	0.619797	0.560832	0.904864	-0.690133	-0.83436	-0.144228
KVH58078.1	1	1	6.1	0.582137	8.56855	Low	High	KVH58078.1 hypothetical protein Ccrd_025667 [Cynara cardunculus var. scolymus]	794.514	927.821	1694.83	2880.91	1093.64	1533.12	1009.5	994.83	27275.8	1139.05	1835.89	9760.03	0.620438	0.116706	0.188103	-0.688642	-3.09905	-2.41041
OTG05848.1	1	1	10.98	0.131509	1.65667	Low	High	OTG05848.1 putative NPR1-like protein 3 [Helianthus annuus]	19710.2	9017.97	13402	19789	25995.5	21981.8	32642.6	18224.5	18928.6	14043.4	22588.8	23265.2	0.621699	0.603622	0.970924	-0.685712	-0.728283	-0.0425703
OTG10331.1	1	1	7.79	0.607136	1.60754	Medium	High	OTG10331.1 putative molybdenum cofactor sulfurase, Pyruvate kinase-like, insert domain protein [Helianthus annuus]	154461	76931.1	268474	141922	283137	378495	241926	35122.2	259665	166622	267851	178904	0.62207	0.931348	1.49718	-0.684851	-0.102608	0.582243
KVH95211.1	1	1	6.68	0.423274	1.60739	Medium	High	KVH95211.1 Glycoside hydrolase, family 9 [Cynara cardunculus var. scolymus]	6633.87	5795.51	3087.3	8996.47	11288.1	4656.81	3339.44	5908.89	7533.35	5172.23	8313.8	5593.9	0.622126	0.92462	1.48623	-0.684722	-0.113068	0.571655
KVI02708.1	2	2	14.46	0.13882	1.60639	Medium	High	KVI02708.1 Exonuclease [Cynara cardunculus var. scolymus]	7438.93	8114.4	10174.2	14101.6	14696	12531	12724.1	7432.16	16112.3	8575.84	13776.2	12089.5	0.622512	0.709363	1.13952	-0.683826	-0.495404	0.188422
KVH90787.1	1	1	11.01	0.774604	1.60638	Medium	High	KVH90787.1 Mlo-related protein [Cynara cardunculus var. scolymus]	24426.4	26410.8	27582.9	37993.2	75496	12483.7	52321.6	50186.2	19955.2	26140	41991	40821	0.622516	0.640358	1.02866	-0.683817	-0.643049	0.0407686
AAB68399.1	2	2	45.38	0.341443	1.60531	Medium	High	AAB68399.1 calmodulin [Helianthus annuus]	82685.9	49085.8	134638	118507	178616	130548	95085.4	58616	155744	88803.3	142557	103148	0.622931	0.860927	1.38206	-0.682855	-0.216037	0.466818
OTF86684.1	1	1	9.64	0.284441	2.06767	Medium	Low	OTF86684.1 hypothetical protein HannXRQ_Chr17g0553461 [Helianthus annuus]	157762	138008	232453	219582	223392	403584	133280	25101.5	251045	176075	282186	136476	0.623966	1.29015	2.06767	-0.68046	0.367544	1.048
OTG06895.1	1	1	6.72	0.220805	2.18316	Medium	Low	OTG06895.1 putative glycosyl hydrolase family protein [Helianthus annuus]	39043.7	15582.6	48442.2	55613.7	62543.1	46918.5	17883.2	7390.71	50339.3	34356.2	55025.1	25204.4	0.624372	1.3631	2.18316	-0.679521	0.446893	1.12641
OTG18201.1	5	1	65.29	0.368983	2.98263	Low	High	OTG18201.1 putative NAD(P)-binding domain-containing protein [Helianthus annuus]	1047.34	1733.3	1405.6	4185.33	859.66	1656.43	1669.48	8492.78	2323.77	1395.42	2233.81	4162.01	0.62468	0.335275	0.536714	-0.67881	-1.57658	-0.897775
KVH92656.1	1	1	8.15	0.486352	1.59966	Medium	High	KVH92656.1 Bromodomain transcription factor [Cynara cardunculus var. scolymus]	10181.8	7278.51	8272.15	12619.7	6251.62	22292	12000.4	12458.2	11274.8	8577.5	13721.1	11911.2	0.625132	0.720123	1.15195	-0.677767	-0.473684	0.204083
OTG15316.1	1	1	6.65	0.275999	1.81835	Medíum	Low	OTG15316.1 putative solute-binding protein family 3/N-terminal domain of MltF [Helianthus annuus]	4116.79	5906.68	7734.16	10429.1	11333.9	6624.84	3692.53	1757.5	10161.8	5919.21	9462.59	5203.95	0.625538	1.13745	1.81835	-0.676831	0.185798	0.862629
OTF94003.1	9	9	169.52	0.626237	1.59791	Medíum	High	OTF94003.1 putative ribosomal protein L14, Translation protein SH3-like domain protein [Helianthus annuus]	47128.6	42995.2	92658.2	61464	156835	73770.9	123712	30824.5	74511.7	60927.3	97356.5	76349.3	0.625817	0.798008	1.27515	-0.676188	-0.325525	0.350663
XP_022013953.1	2	2	17.78	0.35277	1.59782	Medium	High	XP_022013953.1 uncharacterized protein LOC110913430 [Helianthus annuus]	27684.6	21498.3	30553.7	40258.2	63096.6	24050	56759.7	31111.9	32818.5	26578.9	42468.3	40230	0.625852	0.660672	1.05564	-0.676107	-0.597993	0.0781137
KVH93815.1	1	1	8.74	0.365192	2.062	Low	High	KVH93815.1 Mitochondrial carrier domain-containing protein [Cynara cardunculus var. scolymus]	7497.08	2674.23	3131.67	7973.52	9589.38	3692.23	15447.7	4299.37	7683.73	4434.33	7085.04	9143.59	0.625871	0.484966	0.774865	-0.676062	-1.04405	-0.367984
OTG34386.1	7	1	98.95	0.205865	1.59752	Medium	High	OTG34386.1 putative band 7 domain, Stomatin family [Helianthus annuus]	7920.85	5004.8	10088.4	9839.24	12557.1	14369.1	12588	7146.12	13834.9	7671.36	12255.1	11189.7	0.625971	0.685575	1.09522	-0.675833	-0.544614	0.131219
XP_022032907.1	2	2	14.01	0.233248	1.74956	Medium	Low	XP_022032907.1 protein FAR1-RELATED SEQUENCE 5-like [Helianthus annuus]	45129.4	19323	46416.8	42623.6	60981.9	73485.2	51785	24982.4	24453	36956.4	59030.2	33740.1	0.626059	1.09533	1.74956	-0.675629	0.131359	0.806988
KVI07752.1	1	1	11.06	0.112682	1.70701	Low	High	KVI07752.1 hypothetical protein Ccrd_013891 [Cynara cardunculus var. scolymus]	27978	20388.9	23006.9	31108.8	56246	26556.4	50091.8	36777.6	34966	23791.3	37970.4	40611.8	0.626574	0.585821	0.934959	-0.674444	-0.771468	-0.0970249
KVH44675.1	1	1	8.01	0.595269	1.59577	Medium	High	KVH44675.1 hypothetical protein Ccrd_025738 [Cynara cardunculus var. scolymus]	35841.4	24283.4	48345.8	48109	90247.7	34737.3	14387.6	59509.7	49637	36156.8	57698	41178.1	0.626657	0.878059	1.40118	-0.674253	-0.187609	0.486644
KVH91426.1	1	1	6.46	0.0762145	3.53427	Low	High	KVH91426.1 Aminoacyl-tRNA synthetase, class II (D/K/N) [Cynara cardunculus var. scolymus]	587.067	999.191	222.546	1370.8	342.321	1172.07	2135.68	2376.3	1880.81	602.934	961.732	2130.93	0.626926	0.282944	0.45132	-0.673633	-1.82141	-1.14778
OTF96375.1	1	1	6.11	0.447847	1.82748	Medium	Low	OTF96375.1 hypothetical protein HannXRQ_Chr15g0493471 [Helianthus annuus]	11427.6	4744.99	22546.6	19808.9	30483.3	11424.5	7125.94	4067.24	22578.2	12906.4	20572.2	11257.1	0.627369	1.14651	1.82748	-0.672614	0.197245	0.869859
KVH97217.1	1	1	7	0.716704	2.05572	Low	High	KVH97217.1 Multi antimicrobial extrusion protein [Cynara cardunculus var. scolymus]	239773	62997.4	117737	288716	283182	97954.8	557590	57901.6	248955	140169	223284	288149	0.627761	0.486447	0.774892	-0.671712	-1.03964	-0.367932
KVH97516.1	1	1	7.21	0.218455	1.68768	Low	High	KVH97516.1 Cation-transporting P-type ATPase [Cynara cardunculus var. scolymus]	16420.1	23736.4	29514.7	21065.1	32734.8	57037	45755.5	38821.3	33005.9	23223.7	36945.6	39194.2	0.628592	0.59253	0.942629	-0.669804	-0.755041	-0.0852374
OTG07816.1	1	1	10.83	0.396403	1.58911	Medium	High	OTG07816.1 putative peroxidase [Helianthus annuus]	22539.5	19887.5	33644.6	55608.1	24075.4	41203	46746	21532.5	41092.3	25357.2	40295.5	36456.9	0.629281	0.695539	1.10529	-0.668223	-0.523797	0.144426
OTG16518.1	1	1	11.69	0.0619534	3.93856	Low	High	OTG16518.1 putative carbonic anhydrase [Helianthus annuus]	11204	33583.1	22231.7	40068.9	33115.5	32983.6	77107.7	151094	35755.7	22339.6	35389.3	87985.9	0.631252	0.2539	0.402216	-0.663712	-1.97767	-1.31396
OTF96526.1	1	1	6.24	0.601787	2.26057	Low	High	OTF96526.1 putative zinc finger, NHR/GATA-type [Helianthus annuus]	3800.81	18485	2921.43	9507.2	27315.6	3081.54	33278.6	19043.6	4660.5	8402.42	13301.4	18994.2	0.631693	0.442367	0.700287	-0.662704	-1.17669	-0.513981
ACE07188.1	1	1	10.07	0.165307	1.6803	Low	High	ACE07188.1 Art v 3.0301 allergen precursor [Artemisia vulgaris]	15267.3	10777.1	11470.3	20683.8	20874.2	17789.6	22307.2	11662.3	29066.6	12504.9	19782.6	21012	0.632119	0.595132	0.941487	-0.661731	-0.748718	-0.0869871
KVI00045.1	1	1	9.18	0.054177	2.8597	Low	High	KVI00045.1 Beta-grasp domain-containing protein [Cynara cardunculus var. scolymus]	1231.78	1169.62	1147.88	2135.11	2559.25	919.941	4693.32	3366.62	2089.94	1183.09	1871.43	3383.29	0.632186	0.349687	0.55314	-0.661579	-1.51586	-0.854284
OTG04849.1	1	1	9.61	0.278842	1.94139	Medium	Low	OTG04849.1 putative protein of unknown function DUF3475 [Helianthus annuus]	5268.64	3238.01	9634.57	8118.5	12472.9	8101.57	4353.09	1682.78	8743.72	6047.07	9564.33	4926.53	0.632253	1.22745	1.94139	-0.661427	0.295665	0.957092
OTG10702.1	1	1	11.46	0.296707	1.6049	Medium	Low	OTG10702.1 putative 6-phosphogluconate dehydrogenase family protein [Helianthus annuus]	40517.6	25207	40666.7	48399.9	72836.9	46953.6	43851	14763.1	46184	35463.8	56063.4	34932.7	0.632565	1.0152	1.6049	-0.660714	0.0217681	0.682482
OTG25492.1	1	1	7.72	0.504588	1.83074	Medium	Low	OTG25492.1 putative serine protease inhibitor (SERPIN) family protein [Helianthus annuus]	108758	49224.6	77637.1	54467.7	198167	119459	104675	16949.5	81622.8	78540	124031	67749.1	0.633228	1.15928	1.83074	-0.659204	0.213225	0.872429
KVH95327.1	1	1	11.89	0.120538	1.94683	Low	High	KVH95327.1 Tim10/DDP family zinc finger [Cynara cardunculus var. scolymus]	4197.43	3653.24	8198.54	7530.25	10726.5	7084.64	6811.21	14177.6	10256.2	5349.74	8447.13	10415	0.63332	0.513656	0.811053	-0.658994	-0.961125	-0.302131
OTG30791.1	1	1	6.28	0.291503	2.15667	Low	High	OTG30791.1 hypothetical protein HannXRQ_Chr03g0068371 [Helianthus annuus]	5410.08	4171.35	3747.15	4441.58	9741.88	6860.94	9563.34	15115	4067.02	4442.86	7014.8	9581.8	0.633355	0.463677	0.732096	-0.658913	-1.10881	-0.449895
OTG11560.1	1	1	8.27	0.136632	1.57784	Medium	High	OTG11560.1 putative elongation factor family protein [Helianthus annuus]	79126.2	51708.1	34755.7	85724.5	86677.2	88872.4	57717.6	41020.1	71877.3	55196.7	87091.4	56871.7	0.633779	0.970548	1.53137	-0.657948	-0.0431287	0.61482
XP_022004470.1	1	1	9.77	0.300001	1.74499	Low	High	XP_022004470.1 putative disease resistance RPP13-like protein 1 [Helianthus annuus]	31915.9	27268.1	15617.9	24184.7	59595.5	34232.2	59503.3	44055.2	26970.4	24934	39337.5	43509.6	0.633848	0.573068	0.904109	-0.657792	-0.803222	-0.145431
KVI00086.1	3	2	59.35	0.0979312	1.57553	Medium	High	KVI00086.1 Ribosomal protein 60S, partial [Cynara cardunculus var. scolymus]	24747.8	20578.1	29147.5	40057.4	47455.7	29822	31979.4	25403	38396.4	24824.4	39111.7	31926.3	0.634706	0.777554	1.22506	-0.655839	-0.362984	0.292855
OTG36787.1	1	1	6.61	0.219398	1.92865	Low	High	OTG36787.1 putative zinc finger, RING/FYVE/PHD-type [Helianthus annuus]	14078.8	15384	9931.34	12231.3	16303.6	33483.5	20359	36714.1	18904.2	13131.4	20672.8	25325.8	0.6352	0.518498	0.816275	-0.654717	-0.947589	-0.292873
KVH90660.1	1	1	8.47	0.387567	1.93123	Medium	Low	KVH90660.1 Aquaporin-like protein [Cynara cardunculus var. scolymus]	5653.69	5662.78	5779.3	9928.25	11446.4	5535.15	9572.63	56.8168	4304.57	5698.59	8969.93	4644.67	0.6353	1.22691	1.93123	-0.65449	0.295029	0.94952
XP_021974839.1	1	1	9.52	0.384643	2.37704	Medium	Low	XP_021974839.1 uncharacterized protein LOC110869946 [Helianthus annuus]	15248.1	6256.71	42914.8	31668.8	55854.4	13746.1	8798.53	245.443	33559.1	21473.2	33756.4	14201	0.636121	1.51209	2.37704	-0.652628	0.596541	1.24917
KVI06726.1	1	1	6.12	0.773124	1.61787	Low	High	KVI06726.1 hypothetical protein Ccrd_014919 [Cynara cardunculus var. scolymus]	42931.2	48196	56718.7	81429.3	104133	46788.3	138769	16940.7	83485.3	49282	77450.2	79731.7	0.636306	0.618098	0.971384	-0.652207	-0.694094	-0.0418863
KVH97646.1	1	1	19.83	0.995589	1.57033	Medium	High	KVH97646.1 Bet v I domain-containing protein [Cynara cardunculus var. scolymus]	31948.7	4404.42	48810.1	120281	8451.75	5001.43	99061.7	12001	4218.58	28387.7	44578	38427.1	0.63681	0.738743	1.16007	-0.651064	-0.436855	0.21421
OTG02194.1	1	1	7.15	0.125517	1.81433	Medium	Low	OTG02194.1 putative ribonuclease H-like domain-containing protein [Helianthus annuus]	46756.2	29166.6	37868.1	45688.9	81049.9	51907.2	44933.2	20598.6	32932.4	37930.3	59548.7	32821.4	0.636963	1.15566	1.81433	-0.650719	0.208714	0.859433
OTF96995.1	1	1	8.52	0.323206	1.56831	Medium	High	OTF96995.1 putative peptidase S8, subtilisin-related protein [Helianthus annuus]	143584	65202.3	218082	162725	303770	202966	193996	162251	200947	142290	223154	185731	0.63763	0.766106	1.20149	-0.649208	-0.384385	0.264823
OTG30440.1	2	2	44.4	0.136941	1.92863	Low	High	OTG30440.1 putative gamma interferon inducible lysosomal thiol reductase GILT [Helianthus annuus]	24924.9	17864.6	14385.9	26321	34583.7	28753.2	53706.8	20698.4	35865.3	19058.5	29885.9	36756.8	0.637707	0.518502	0.813072	-0.649035	-0.94758	-0.298545
KVI08007.1	1	1	16.54	0.369122	2.16262	Low	High	KVI08007.1 hypothetical protein Ccrd_013627 [Cynara cardunculus var. scolymus]	10212.8	9348.54	6244.69	7857.79	25958.6	6633.87	26100	20789.3	8919.31	8602.02	13483.4	18602.9	0.637971	0.462403	0.724803	-0.648438	-1.11278	-0.464339
OTG35324.1	2	2	23.31	0.208523	1.56669	Medium	High	OTG35324.1 putative superoxide dismutase [Cu-Zn] protein [Helianthus annuus]	47541.8	33381.3	48437.1	62084.6	89438.3	51144.3	47165.9	42827.5	73467.3	43120.1	67555.8	54486.9	0.638289	0.791384	1.23985	-0.647718	-0.337549	0.310169
AAC49406.1	1	1	12.89	0.582988	5.2393	Low	High	AAC49406.1 cysteine proteinase [Zinnia violacea]	1860.74	108.968	1060.5	543.551	2753.08	1450.14	4388.09	11243.7	244.345	1010.07	1582.26	5292.06	0.638373	0.190865	0.298987	-0.647528	-2.38937	-1.74185
OTG29877.1	1	1	9	0.413766	1.56615	Medium	High	OTG29877.1 putative ubiquitin fusion degradation UFD1 family protein [Helianthus annuus]	7624.48	16463.6	12902.4	13515.9	26225.7	18191.2	24196.6	14688	9861.71	12330.2	19311	16248.8	0.638507	0.758838	1.18846	-0.647225	-0.398136	0.249088
OTF92646.1	1	1	9.19	0.058634	10.8235	Low	High	OTF92646.1 putative dynamin central domain-containing protein [Helianthus annuus]	1052.82	1490.65	2077.57	2221.93	1050.95	3964.26	6408.33	39503.6	4104.1	1540.35	2412.38	16672	0.638517	0.0923912	0.144696	-0.647202	-3.4361	-2.7889
OTG31233.1	4	3	46.47	0.0250318	2.11539	Low	High	OTG31233.1 putative alpha/beta-Hydrolases superfamily protein [Helianthus annuus]	31436.7	38032.5	30918.2	49486.4	63042.5	44547.9	96892.6	66434.3	49032.1	33462.5	52358.9	70786.3	0.639098	0.472725	0.739676	-0.645892	-1.08093	-0.435035
OTG15930.1	1	1	7.56	0.173287	4.22995	Medium	Low	OTG15930.1 putative armadillo-type fold protein [Helianthus annuus]	2089	4372.28	1991.56	8719.4	3438.12	1050	636.629	843.679	1642.07	2817.61	4402.51	1040.79	0.640002	2.70718	4.22995	-0.643851	1.43679	2.08064
XP_022031087.1	1	1	6.07	0.420719	1.81129	Low	High	XP_022031087.1 protein FAR1-RELATED SEQUENCE 5-like [Helianthus annuus]	68158.4	89217.2	104949	122511	192148	94966.1	213599	196660	64887.1	87441.4	136542	158382	0.640401	0.552091	0.862102	-0.642952	-0.857021	-0.214069
OTG32074.1	1	1	8.84	0.103638	2.61669	Low	High	OTG32074.1 putative mitogen-activated protein (MAP) kinase kinase kinase Ste11, Cryptococcus [Helianthus annuus]	12864.3	7369.61	11106.8	21223.5	17576.6	10114.4	34694.2	13202.4	34112.2	10446.9	16304.8	27336.3	0.640724	0.382162	0.596454	-0.642226	-1.38774	-0.745517
OTG12416.1	2	1	20.84	0.204705	2.00144	Low	High	OTG12416.1 putative nucleotide-binding alpha-beta plait domain-containing protein [Helianthus annuus]	3705.56	4550.09	1917.27	3922.74	3266.81	8664.37	6784.39	8823.54	4752.53	3390.97	5284.64	6786.82	0.641665	0.499641	0.778662	-0.640107	-1.00104	-0.360931
OTF92464.1	1	1	6.35	0.0764343	2.32226	Low	High	OTF92464.1 putative DUF3741-associated sequence motif protein [Helianthus annuus]	13245	16544.3	12395.7	20849.7	21051.3	23704.8	30852.8	50090.7	17020.8	14061.6	21868.6	32654.7	0.643007	0.430616	0.669691	-0.637094	-1.21553	-0.578434
OTG07453.1	1	1	8.13	0.270475	10.199	Low	High	OTG07453.1 putative mannose-6-phosphate isomerase, type I [Helianthus annuus]	3557.92	1799.47	636.029	2806.13	4111.75	2399.54	2090.89	54286.6	4749.42	1997.81	3105.81	20375.6	0.643248	0.0980488	0.152428	-0.636552	-3.35036	-2.7138
AIT39757.1	1	1	9.89	0.702769	1.87682	Low	High	AIT39757.1 heat shock protein 90kDa beta, partial [Chrysanthemum boreale]	1.69956e+06	1.61511e+06	847006	1.87115e+06	3.79941e+06	797525	5.05421e+06	1.54816e+06	1.20833e+06	1.38722e+06	2.15603e+06	2.60357e+06	0.643416	0.532817	0.828106	-0.636176	-0.908289	-0.272112
AFU82535.1	1	1	10.5	0.341756	1.92233	Low	High	AFU82535.1 alpha-1,6-xylosyltransferase, partial [Artemisia tridentata]	2945.89	5920.03	3175.71	4436	4416.89	9852.58	10922.5	8505.25	3720.18	4013.88	6235.16	7715.97	0.643749	0.520203	0.808084	-0.63543	-0.942852	-0.307422
OTG01864.1	1	1	8.08	0.653066	1.55302	Medium	High	OTG01864.1 putative SNF2-related, N-terminal domain-containing protein [Helianthus annuus]	32658.1	11328.4	73288.7	92978.4	57514.2	31637.5	35669.4	11095.5	83932.4	39091.7	60710	43565.7	0.643909	0.897304	1.39353	-0.635072	-0.156331	0.478741
BAA07912.1	1	1	8.04	0.319185	1.90469	Medium	Low	BAA07912.1 unnamed protein product [Lactuca sativa]	12429.7	19975.2	29093.1	35064.2	27719.2	32583.7	21492.4	3253.19	25324	20499.4	31789.1	16689.9	0.644856	1.22825	1.90469	-0.632952	0.296605	0.929557
KVH92911.1	1	1	8.63	0.110482	5.9948	Low	High	KVH92911.1 hypothetical protein Ccrd_005058 [Cynara cardunculus var. scolymus]	8675.57	6137.78	7789.59	12334.5	7470.42	15236.2	12872.7	103270	19357.2	7534.32	11680.4	45166.7	0.645042	0.166811	0.258605	-0.632535	-2.58371	-1.95118
OTG18437.1	1	1	6.93	0.215017	3.2157	Low	High	OTG18437.1 putative SRA-YDG, PUA-like domain protein [Helianthus annuus]	17989.1	19154	13094.4	18268.6	39934.1	19604.5	92287.7	53241	16020	16745.8	25935.7	53849.6	0.645667	0.310974	0.481633	-0.631139	-1.68513	-1.05399
KVI09263.1	1	1	6.46	0.653435	1.54818	Medium	High	KVI09263.1 Ribosomal protein L27, partial [Cynara cardunculus var. scolymus]	134726	30776.3	101963	199337	75149.7	139598	93969.4	38469.9	185389	89155.2	138028	105943	0.64592	0.841541	1.30286	-0.630572	-0.248895	0.381678
OTG34252.1	1	1	6.54	0.543527	37.3439	Low	High	OTG34252.1 putative mitochodrial transcription termination factor [Helianthus annuus]	322.714	469.126	332.256	292.27	300.617	1146.76	261.413	403.728	41313	374.699	579.882	13992.7	0.646164	0.0267782	0.0414417	-0.630028	-5.2228	-4.59277
KVH95096.1	1	1	14.43	0.781046	1.54718	Medium	High	KVH95096.1 hypothetical protein Ccrd_002809 [Cynara cardunculus var. scolymus]	387550	184826	248411	244335	775769	249802	518825	111360	319582	273596	423302	316589	0.646337	0.864199	1.33707	-0.629642	-0.210564	0.419078
KVI07517.1	3	2	22.74	0.132066	1.54686	Medium	High	KVI07517.1 hypothetical protein Ccrd_014086 [Cynara cardunculus var. scolymus]	3618.66	2434.6	3806.47	4843.7	6438.96	3968.98	3713	3928.6	5168.38	3286.58	5083.88	4269.99	0.64647	0.769692	1.19061	-0.629344	-0.377647	0.251697
OTF84575.1	1	1	7.01	0.600198	1.54604	Medium	High	OTF84575.1 putative photosystem antenna protein-like protein [Helianthus annuus]	48365.7	78565.7	68116.7	161647	63064.1	76841.2	31667.3	91949.5	94394.8	65016	100518	72670.5	0.646813	0.894668	1.3832	-0.62858	-0.160576	0.468005
KVH92620.1	1	1	8.99	0.27869	2.48304	Medium	Low	KVH92620.1 UDP-glucuronosyl/UDP-glucosyltransferase, partial [Cynara cardunculus var. scolymus]	4458.61	5500.73	8184.87	17405.7	7165.82	3469.81	784.925	1676.75	8831.46	6048.07	9347.1	3764.38	0.647053	1.60666	2.48304	-0.628044	0.684063	1.31211
OTG11654.1	1	1	8.75	0.430324	1.54298	Medium	High	OTG11654.1 putative heat shock protein 70 family, peptide-binding domain protein [Helianthus annuus]	2934.8	2246.65	1916.76	2163.75	2878.98	5909.64	3980.64	3168.51	2632.98	2366.07	3650.79	3260.71	0.648098	0.725631	1.11963	-0.625715	-0.462693	0.163022
OTG12906.1	1	1	7.82	0.677572	1.5418	Medium	High	OTG12906.1 hypothetical protein HannXRQ_Chr10g0314771 [Helianthus annuus]	10510.9	10992.7	11200.4	22326.8	19179.1	8917.09	16772	6085.83	22106.1	10901.3	16807.7	14988	0.648593	0.727339	1.12141	-0.624614	-0.4593	0.165314
prf	9	2	115.28	0.344806	1.74219	Low	High		29807.8	39776.2	40396.2	45537.3	96795.2	26967.2	79081.2	66279.4	46245.8	36660.1	56433.2	63868.8	0.649619	0.57399	0.88358	-0.622335	-0.800902	-0.178567
OTG17970.1	1	1	11.46	0.0664522	2.74319	Low	High	OTG17970.1 putative ribosomal L27e protein family [Helianthus annuus]	1389.57	1473.43	1905.64	3308.29	3047.01	977.757	4574.26	3371.79	5135.27	1589.55	2444.35	4360.44	0.650295	0.364539	0.560575	-0.620835	-1.45586	-0.835022
KVI04481.1	1	1	6.05	0.321492	1.69163	Low	High	KVI04481.1 Leucine-rich repeat-containing protein [Cynara cardunculus var. scolymus]	2939.14	4015.93	6094.82	10090.4	6409.38	3546.55	5749.02	6218.47	10108.1	4349.96	6682.12	7358.54	0.650985	0.591145	0.908077	-0.619304	-0.758417	-0.139113
KVH97746.1	1	1	10.17	0.244811	2.26887	Low	High	KVH97746.1 Nucleoside phosphatase GDA1/CD39 [Cynara cardunculus var. scolymus]	29185	46404.5	60950.7	40745.1	131769	37217.2	113690	136891	59211.6	45513.4	69910.3	103264	0.651025	0.440748	0.677006	-0.619214	-1.18197	-0.562759
OTF98456.1	4	3	64.39	0.494683	1.72927	Medium	Low	OTF98456.1 putative aspartic proteinase [Helianthus annuus]	33419	11284	46113.5	35676.9	72109.8	31478.5	22823.5	7276.94	50433.8	30272.2	46421.7	26844.7	0.652112	1.12768	1.72927	-0.616808	0.173353	0.79016
KVH90950.1	3	1	49.31	0.353111	3.46388	Low	High	KVH90950.1 Aldo/keto reductase [Cynara cardunculus var. scolymus]	7371.25	9757.39	6979.5	6284.15	4584.6	26087.1	8183.42	57619.2	17705.1	8036.05	12318.6	27835.9	0.65235	0.288693	0.442544	-0.616282	-1.79239	-1.17611
KVH88665.1	1	1	6.4	0.0750022	1.98696	Low	High	KVH88665.1 Bromo adjacent homology (BAH) domain-containing protein, partial [Cynara cardunculus var. scolymus]	12564.5	13694	21505.1	19856.1	36125.7	17184.3	33237.5	25389.5	36277.2	15921.2	24388.7	31634.7	0.65281	0.503282	0.770947	-0.615265	-0.990561	-0.375296
KVG03628.1	1	1	17.56	0.26901	2.3676	Low	High	KVG03628.1 Nucleic acid-binding, OB-fold, partial [Cynara cardunculus var. scolymus]	24538.9	19244.1	16789.9	45769.1	36264.7	10557.4	55603.8	25039.8	62769.2	20191	30863.8	47804.3	0.654197	0.422368	0.645628	-0.612202	-1.24343	-0.631226
KVI11768.1	1	1	7.64	0.449562	1.86785	Medium	Low	KVI11768.1 Sialidase [Cynara cardunculus var. scolymus]	2494.05	1940.9	5013.11	2620.05	8367.22	3433.2	1746.87	1703.01	4270.46	3149.36	4806.83	2573.45	0.655184	1.22379	1.86785	-0.610027	0.291355	0.901382
KVI11479.1	1	1	6.71	0.387422	1.58453	Medium	Low	KVI11479.1 FG-GAP repeat-containing protein [Cynara cardunculus var. scolymus]	2866.16	4170.53	3862.95	8333.88	5320.78	2978.74	2482.4	4194.94	3820.05	3633.22	5544.47	3499.13	0.655287	1.03832	1.58453	-0.609802	0.0542505	0.664053
KVH94607.1	2	2	23.07	0.427324	1.52321	Medium	High	KVH94607.1 NADH dehydrogenase [ubiquinone] (complex I), alpha subcomplex, subunit 2 [Cynara cardunculus var. scolymus]	4760	4985.49	5878.53	7677.78	10046.6	6074.27	8795.53	3696.9	11219.7	5208.01	7932.88	7904.05	0.656509	0.658904	1.00365	-0.607114	-0.601859	0.00525438
KVG93227.1	2	2	28.64	0.545692	1.52231	Medium	High	KVG93227.1 hypothetical protein Ccrd_026086 [Cynara cardunculus var. scolymus]	18897.6	11894.6	24201.1	30221.7	33890.2	19604.8	15687.9	5442.13	40918.4	18331.1	27905.6	20682.8	0.656897	0.886296	1.34922	-0.606261	-0.17414	0.432121
XP_021995709.1	1	1	11.44	0.451544	6.66414	Medium	Low	XP_021995709.1 uncharacterized protein LOC110892882 [Helianthus annuus]	94556.1	156144	18632.3	8230.5	68417.4	333239	36708.8	14402	10395.6	89777.4	136629	20502.1	0.657089	4.37893	6.66414	-0.605839	2.13058	2.73642
OTG03863.1	1	1	6.11	0.375478	4.15091	Low	High	OTG03863.1 putative F-box domain-containing protein [Helianthus annuus]	9099.36	12411.5	4778.9	8094.85	24881.3	7002.59	21253.2	80769.5	7103.81	8763.25	13326.3	36375.5	0.657593	0.240911	0.366352	-0.604733	-2.05343	-1.4487
OTG12654.1	1	1	7.62	0.362822	1.54055	Medium	Low	OTG12654.1 putative phosphatidylinositol-4-phosphate 5-kinase family protein [Helianthus annuus]	13484.4	8429.17	8428.58	13041.7	22925.6	10130.9	9102.07	6429.2	14391.8	10114.1	15366	9974.37	0.658208	1.014	1.54055	-0.603385	0.0200633	0.623448
KVI09435.1	1	1	7.94	0.602098	1.51863	Medium	High	KVI09435.1 hypothetical protein Ccrd_012201 [Cynara cardunculus var. scolymus]	2509.35	2672.45	3990.14	4762.79	5378.62	3787.34	4485.32	1051.06	5971.99	3057.31	4642.92	3836.13	0.65849	0.796979	1.21031	-0.602767	-0.327386	0.275382
OTF98017.1	11	1	139.11	0.562998	1.51581	Medium	High	OTF98017.1 putative 14-3-3-like protein [Helianthus annuus]	4227.17	3159.44	5736.51	8485.41	4337.02	7069.77	4174.59	1838.6	9111.83	4374.37	6630.74	5041.67	0.659712	0.867643	1.31519	-0.600093	-0.204826	0.395266
KVH95611.1	13	13	199.63	0.454412	1.5158	Medium	High	KVH95611.1 K Homology domain-containing protein, partial [Cynara cardunculus var. scolymus]	43732.1	42834.2	86928.4	95887.6	119192	47903.8	56160.1	41860.2	79103.1	57831.6	87661.1	59041.1	0.659718	0.979513	1.48475	-0.60008	-0.0298635	0.570216
KVH95994.1	4	1	89.3	0.429842	1.51568	Medíum	High	KVH95994.1 heme peroxidase [Cynara cardunculus var. scolymus]	130190	244190	205623	283802	411054	184243	249989	161928	295352	193334	293033	235756	0.659769	0.82006	1.24295	-0.599967	-0.286199	0.313768
OTG35664.1	1	1	11.11	0.105984	3.20651	Medium	Low	OTG35664.1 putative pentatricopeptide repeat (PPR-like) superfamily protein [Helianthus annuus]	61751.3	67615.1	104575	87834.4	56893.7	209561	23677	16926	69887.6	77980.5	118096	36830.2	0.660312	2.1173	3.20651	-0.598779	1.08222	1.681
KVI04525.1	1	1	7.54	0.641751	1.5126	Medium	High	KVI04525.1 Ubiquinol-cytochrome c chaperone, CBP3, partial [Cynara cardunculus var. scolymus]	1829.98	918.955	3000.23	2049.04	4514.96	2132.17	2913.35	924.924	3006.54	1916.39	2898.72	2281.6	0.661114	0.83993	1.27048	-0.59703	-0.251659	0.345371
KVI01987.1	1	1	12.31	0.326305	1.51124	Medium	High	KVI01987.1 Calcium-binding EF-hand [Cynara cardunculus var. scolymus]	11998.3	6735.88	11885.8	12171.6	16087.4	18015.2	12738	7018.63	15869.9	10206.6	15424.7	11875.5	0.661708	0.859471	1.29887	-0.595734	-0.218479	0.377255
KVH89582.1	1	1	17.05	0.366501	1.56107	Low	High	KVH89582.1 Rossmann-like alpha/beta/alpha sandwich fold [Cynara cardunculus var. scolymus]	12836	11335.4	8563.05	13328.1	19247.8	16889.4	28424.3	9941.96	12734.5	10911.5	16488.4	17033.6	0.661766	0.640587	0.967996	-0.595606	-0.642533	-0.0469274
XP_021980567.1	1	1	6.59	0.349913	1.62886	Medium	Low	XP_021980567.1 uncharacterized protein LOC110876714 [Helianthus annuus]	330107	165525	609381	516488	725529	427634	299074	233555	492414	368338	556550	341681	0.661823	1.07802	1.62886	-0.595482	0.10838	0.703862
KVI06110.1	6	2	112.32	0.341047	1.50826	Medium	High	KVI06110.1 Galactose mutarotase-like domain-containing protein [Cynara cardunculus var. scolymus]	104200	69290.3	63459.8	72697.5	164451	120233	104236	64760.3	79511.9	78983.3	119127	82836.2	0.663016	0.953488	1.43811	-0.592884	-0.0687133	0.524171
OTG32251.1	1	1	8.14	0.202898	3.64387	Medium	Low	OTG32251.1 putative UDP-glucuronosyl/UDP-glucosyltransferase [Helianthus annuus]	8552.78	14089.5	8410.08	34823.1	5967.07	6028.28	5780.45	3197.23	3870.89	10350.8	15606.2	4282.85	0.663249	2.41679	3.64387	-0.592377	1.27309	1.86547
OTG20752.1	2	2	17.36	0.247388	2.39998	Low	High	OTG20752.1 hypothetical protein HannXRQ_Chr07g0196581 [Helianthus annuus]	59207.5	57993.2	21233.2	28053.4	56827.6	123617	146559	122181	63497.6	46144.6	69499.4	110746	0.663957	0.416671	0.627557	-0.590838	-1.26302	-0.672182
KVI06376.1	1	1	8.22	0.204009	1.9965	Medium	Low	KVI06376.1 Alpha-N-acetylglucosaminidase, partial [Cynara cardunculus var. scolymus]	1149.34	829.831	1254.16	2137.92	1461.97	1268.96	1862.38	306.242	270.064	1077.78	1622.95	812.897	0.664086	1.32585	1.9965	-0.590559	0.406914	0.997473
OTG31388.1	2	1	17.82	0.130252	1.50299	Medium	High	OTG31388.1 putative FASCICLIN-like arabinogalactan 2 [Helianthus annuus]	17643.2	21841.2	28150.6	29317.2	44174.6	28163.2	25271.8	31139.7	30525.7	22545	33885	28979	0.665338	0.777976	1.16929	-0.58784	-0.362203	0.225637
KVH97773.1	6	2	129.33	0.320203	1.58746	Low	High	KVH97773.1 hypothetical protein Ccrd_000128 [Cynara cardunculus var. scolymus]	25307.9	23881.5	43148.7	35562.7	61270	41904.3	57643.2	61912.9	27027.1	30779.3	46245.7	48861.1	0.665561	0.629936	0.946473	-0.587357	-0.666724	-0.0793666
OTG27010.1	1	1	7.72	0.513835	1.51689	Medium	Low	OTG27010.1 putative NB-ARC [Helianthus annuus]	751634	392248	554772	522894	761577	1.26335e+06	777192	219159	683279	566218	849272	559877	0.66671	1.01133	1.51689	-0.584869	0.016249	0.601118
OTG24947.1	3	1	59.24	0.613805	1.49826	Medium	High	OTG24947.1 putative cytochrome b-c1 complex subunit 7 [Helianthus annuus]	16886.4	12541.6	19915.4	17709.5	37155	19064.6	29230.2	10166.8	26842.4	16447.8	24643.1	22079.8	0.667441	0.744925	1.11609	-0.583288	-0.424834	0.158455
OTG37353.1	1	1	8.68	0.284475	2.79852	Low	High	OTG37353.1 putative heavy metal transport/detoxification superfamily protein [Helianthus annuus]	36358.2	46117.4	82285.7	31790.7	116942	98060.1	92696.4	292175	76216.2	54920.5	82264.2	153696	0.66761	0.357332	0.535241	-0.582922	-1.48466	-0.90174
XP_021972145.1	2	2	14.6	0.582793	1.49774	Medium	High	XP_021972145.1 uncharacterized protein LOC110867417 [Helianthus annuus]	4089.67	3063.38	5400.39	4610.06	7919.39	6272.39	5464.15	7880.68	1748.24	4184.48	6267.28	5031.02	0.667671	0.831736	1.24573	-0.582791	-0.265803	0.316988
KVI00033.1	1	1	7.73	0.460657	2.24756	Medium	High	KVI00033.1 hypothetical protein Ccrd_021716 [Cynara cardunculus var. scolymus]	2930.94	285.191	1653.05	1252.09	2892.41	3141.48	1429.81	696.359	1115.56	1623.06	2428.66	1080.57	0.668295	1.50203	2.24756	-0.581442	0.586918	1.16836
OTG04157.1	1	1	8.49	0.209224	6.76153	Low	High	OTG04157.1 putative ribonuclease H-like domain-containing protein [Helianthus annuus]	3272.7	3826.26	3869.79	4927.56	6627.5	4846.06	6131.6	5830.8	62203.1	3656.25	5467.04	24721.8	0.66878	0.147896	0.221142	-0.580395	-2.75735	-2.17695
OTG17339.1	1	1	10.81	0.498409	1.49494	Medium	High	OTG17339.1 putative pectinesterase, catalytic, Pectin lyase fold/virulence factor [Helianthus annuus]	55995.8	46044.7	76032.3	128262	77736.2	60209.8	72085.1	25263.2	86807.6	59357.6	88736	61385.3	0.668923	0.966968	1.44556	-0.580088	-0.0484605	0.531627
KVE49113.1	2	1	17.59	0.303126	2.06184	Medium	Low	KVE49113.1 hypothetical protein Ccrd_023969, partial [Cynara cardunculus var. scolymus]	38039.2	18756.2	52583.8	56533.3	76238.3	30582.8	28007.3	10591.5	40628.8	36459.7	54451.5	26409.2	0.669582	1.38057	2.06184	-0.578668	0.465264	1.04393
KVH98985.1	1	1	6.72	0.277987	2.08019	Medium	Low	KVH98985.1 hypothetical protein Ccrd_022782 [Cynara cardunculus var. scolymus]	15094.4	10962.4	27064.6	24737.7	36263.3	18309.4	8364.53	2148.16	27613.8	17707.1	26436.8	12708.8	0.669791	1.39329	2.08019	-0.578218	0.4785	1.05672
KVH90495.1	1	1	8.58	0.0560677	2.22536	Low	High	KVH90495.1 Zinc finger, FYVE/PHD-type, partial [Cynara cardunculus var. scolymus]	14681	32084	13537.4	19125.5	35579.6	35319.1	42765.7	48514.5	42914.2	20100.8	30008.1	44731.5	0.669846	0.449365	0.670849	-0.578098	-1.15404	-0.57594
OTG10187.1	1	1	9.15	0.448156	2.0184	Medium	Low	OTG10187.1 putative RNA helicase family protein [Helianthus annuus]	101622	14355.4	86149.8	82871.6	140627	78216.8	51564	14141.1	83777.4	67375.6	100572	49827.5	0.669925	1.35218	2.0184	-0.577928	0.435284	1.01321
KVH88540.1	1	1	8.03	0.684072	1.49152	Medium	High	KVH88540.1 hypothetical protein Ccrd_026570 [Cynara cardunculus var. scolymus]	5669.4	8812.86	6974.58	15409.5	9160.56	7433.36	11029.7	15787.7	3727.1	7152.28	10667.8	10181.5	0.670455	0.702478	1.04776	-0.576788	-0.509474	0.0673133
OTG01598.1	1	1	9.49	0.761676	1.79553	Low	High	OTG01598.1 putative P-loop containing nucleoside triphosphate hydrolase [Helianthus annuus]	2334.11	1707.61	3199.39	5012.23	4196.16	1580.98	4023.99	1280.98	7696.66	2413.71	3596.46	4333.88	0.671134	0.556939	0.829848	-0.575327	-0.844408	-0.269081
OTG23715.1	1	1	6.7	0.731242	1.48845	Medium	High	OTG23715.1 putative protein of unknown function DUF1664 [Helianthus annuus]	16582.5	25176.4	24556	35055.8	49382.4	14268.2	43016.5	11033.9	18591.4	22105	32902.1	24213.9	0.671841	0.912903	1.35881	-0.573809	-0.131466	0.442343
OTF85462.1	24	4	485.83	0.371649	1.86135	Medium	Low	OTF85462.1 putative glyceraldehyde-3-phosphate dehydrogenase C2 [Helianthus annuus]	99501.1	65364.2	185658	196693	214251	110617	89812.8	22399.4	167993	116841	173854	93401.7	0.672066	1.25095	1.86135	-0.573325	0.323029	0.896353
OTG11701.1	1	1	15.32	0.871657	1.51621	Medium	Low	OTG11701.1 putative leucine-rich repeat domain, L domain-like protein [Helianthus annuus]	18594.5	15920.6	21903.7	13909.1	56200.7	13740.1	23788.4	16558.6	14955.4	18806.3	27950	18434.1	0.672856	1.02019	1.51621	-0.571631	0.0288347	0.600466
KVI12462.1	2	2	31.31	0.453768	1.48424	Medium	High	KVI12462.1 Protein of unknown function DUF538 [Cynara cardunculus var. scolymus]	76233.7	27713.4	75064.4	87221.4	92265.2	86209.3	44100	47545	117504	59670.5	88565.3	69716.5	0.673746	0.855902	1.27036	-0.569724	-0.224483	0.345241
KVI01072.1	2	2	18.72	0.398799	2.20641	Low	High	KVI01072.1 Non-heme dioxygenase N-terminal domain-containing protein [Cynara cardunculus var. scolymus]	61746	66889.4	23425.5	87979	106412	31184.9	164940	123951	46616.9	50687	75192.1	111836	0.6741	0.453226	0.672342	-0.568966	-1.1417	-0.572733
KVH93208.1	3	3	34.11	0.529581	1.584	Low	High	KVH93208.1 hypothetical protein Ccrd_004732 [Cynara cardunculus var. scolymus]	9991.23	10010.3	14512.7	17251.2	27254.1	6690.57	23108.2	12985	18577.2	11504.7	17065.3	18223.5	0.674159	0.631315	0.936447	-0.568839	-0.663569	-0.0947306
AAM78552.1	5	5	80.61	0.864812	1.48318	Medium	High	AAM78552.1 ribosomal protein small subunit 28 [Helianthus annuus]	18619.6	15380.9	37346.7	32973.5	61137.5	11709.6	26274.4	17304.4	39279.6	23782.4	35273.5	27619.5	0.674227	0.861073	1.27713	-0.568693	-0.215792	0.352901
ARH09092.1	1	1	8.62	0.300734	1.48293	Medium	High	ARH09092.1 ribosomal protein S18 (chloroplast) [Diplostephium mutiscuanum]	90309	86491.2	60745.9	85201.7	97590.7	169473	106340	77453.4	82710.2	79182	117422	88834.6	0.674338	0.891342	1.3218	-0.568455	-0.165948	0.402507
KVH95222.1	1	1	8.83	0.682673	1.48243	Medium	High	KVH95222.1 AAA+ ATPase domain-containing protein [Cynara cardunculus var. scolymus]	29043.8	43391	17264.1	23101.9	36612.7	73258.1	34981.8	58840.8	24237	29899.6	44324.2	39353.2	0.674566	0.759776	1.12632	-0.567968	-0.396353	0.171615
KVI05917.1	1	1	14.71	0.615467	1.48091	Medium	High	KVI05917.1 hypothetical protein Ccrd_015783, partial [Cynara cardunculus var. scolymus]	4451.9	1883.48	12757.3	8599.47	12884.4	6790.6	6410.49	973.673	12900.6	6364.21	9424.83	6761.59	0.67526	0.94123	1.39388	-0.566485	-0.0873815	0.479103
OTF97673.1	3	1	39.86	0.127766	1.87367	Low	High	OTF97673.1 putative ruBisCO large subunit-binding protein subunit beta protein [Helianthus annuus]	2370.37	2502.21	3277.98	3998.82	2918.62	5149.49	3375.7	4512.25	7383.48	2716.85	4022.31	5090.48	0.675445	0.533712	0.790163	-0.566089	-0.905866	-0.339777
KVH92862.1	10	5	168.91	0.293172	1.47993	Medium	High	KVH92862.1 Galactose mutarotase-like domain-containing protein [Cynara cardunculus var. scolymus]	19750.9	12908.9	18996.6	24355.2	32336.5	19755.8	22227	14401	27453	17218.8	25482.5	21360.3	0.67571	0.806109	1.19298	-0.565524	-0.310953	0.254571
OTF99751.1	1	1	7.94	0.633772	1.7444	Low	High	OTF99751.1 putative leucine-rich repeat protein, plant-type [Helianthus annuus]	28265.9	11479.6	16410.9	21375.7	40538.1	21177.2	65357.9	17043.5	15558.1	18718.8	27697	32653.2	0.675842	0.573262	0.848219	-0.565242	-0.802734	-0.237492
KVI07297.1	1	1	8.67	0.571408	2.18539	Medium	Low	KVI07297.1 Major facilitator superfamily [Cynara cardunculus var. scolymus]	6699.18	14843	3909.04	26031.5	5449.76	6164.1	8657.6	1472.11	7096.2	8483.76	12548.5	5741.97	0.67608	1.4775	2.18539	-0.564735	0.563158	1.12789
OTG29008.1	1	1	7.57	0.285087	2.34854	Medium	Low	OTG29008.1 putative vacuolar protein sorting-associated protein 62 [Helianthus annuus]	80790	32077.3	158600	113811	200003	87456.3	33626.7	14931.3	122302	90489.1	133757	56953.3	0.67652	1.58883	2.34854	-0.563796	0.667965	1.23176
XP_021993929.1	1	1	16.93	0.168627	1.51138	Medium	Low	XP_021993929.1 endonuclease 4-like [Helianthus annuus]	15299.2	12981.6	24468	30628.5	24572.6	22733.9	23367.1	12814.4	15383.9	17582.9	25978.4	17188.5	0.676831	1.02295	1.51138	-0.563133	0.0327353	0.595869
CAA03404.1	7	2	107.88	0.705654	1.47678	Medium	High	CAA03404.1 unnamed protein product [Helianthus tuberosus]	21673.1	22503	23177.7	14102.5	50806	34558.3	35490.9	14556.9	19688.7	22451.3	33155.6	23245.5	0.677148	0.965832	1.42632	-0.562456	-0.0501564	0.512299
OTG33642.1	1	1	7.25	0.729165	1.56123	Low	High	OTG33642.1 putative ATPase, AAA-type, core [Helianthus annuus]	1888.02	3132.4	2317.05	1735.69	2831.61	6266.08	2941.92	6556.12	1957.41	2445.82	3611.13	3818.48	0.677302	0.640522	0.945696	-0.562129	-0.64268	-0.0805511
OTF96834.1	1	1	9.42	0.705623	1.47433	Medium	High	OTF96834.1 putative plastid movement impaired1 [Helianthus annuus]	10034.7	10830.3	10923.5	8116.18	27788.5	10962	14884	11119.9	13751.9	10596.2	15622.2	13252	0.678274	0.799593	1.17886	-0.56006	-0.322663	0.237397
KVI02466.1	1	1	6.04	0.813375	2.19343	Low	High	KVI02466.1 Exoribonuclease, phosphorolytic domain 1, partial [Cynara cardunculus var. scolymus]	66314.5	14199.7	6665.54	67764.8	40210.7	20556.1	149335	3091.12	38796.4	29059.9	42843.9	63740.9	0.678275	0.455907	0.672157	-0.560058	-1.13319	-0.573129
CBD31843.1	5	5	73.51	0.0867287	2.07965	Low	High	CBD31843.1 unnamed protein product [Helianthus annuus]	12823.1	14107.2	16371.2	18837.8	26128.4	18867.2	47382.6	21344.3	21325.4	14433.8	21277.8	30017.4	0.678353	0.480849	0.708848	-0.559892	-1.05634	-0.496452
OTG03775.1	5	5	90.44	0.479069	1.47316	Medíum	High	OTG03775.1 putative thioredoxin-like fold protein [Helianthus annuus]	173686	123944	124750	176709	277779	167746	294775	112659	133578	140793	207411	180338	0.678812	0.780721	1.15013	-0.558917	-0.357121	0.201796
OTF98454.1	1	1	7.32	0.34935	1.55247	Medium	Low	OTF98454.1 putative protein kinase-like domain-containing protein [Helianthus annuus]	12172.1	17229.3	34805.6	20393.6	35937.8	38118.6	23186.8	21682.9	15969	21402.3	31483.3	20279.6	0.679799	1.05536	1.55247	-0.556821	0.0777406	0.634561
KVH88959.1	1	1	6.92	0.585575	1.47075	Medium	High	KVH88959.1 Copper amine oxidase [Cynara cardunculus var. scolymus]	24526.2	21510.7	27263.6	29834.3	52944.7	25027.8	35013.2	7613.51	34861	24433.5	35935.6	25829.2	0.679925	0.945963	1.39128	-0.556553	-0.0801441	0.476409
OTG30144.1	1	1	8.12	0.634219	1.47017	Medium	High	OTG30144.1 putative senescence/dehydration-associated protein-related protein [Helianthus annuus]	24964.5	8407.18	40460.1	30031	55581.5	22932.9	37037.5	12592.5	30864.3	24610.6	36181.8	26831.4	0.680193	0.91723	1.34849	-0.555985	-0.124644	0.431341
KVH93891.1	2	2	50.45	0.165749	1.58294	Low	High	KVH93891.1 hypothetical protein Ccrd_004064 [Cynara cardunculus var. scolymus]	65534.6	74925	66487.1	76810.8	108654	118736	145189	111803	70592.8	68982.2	101401	109195	0.680295	0.631734	0.928618	-0.555768	-0.662611	-0.106843
KVH89505.1	3	1	50.53	0.171728	1.4699	Medium	High	KVH89505.1 Nucleic acid-binding, OB-fold [Cynara cardunculus var. scolymus]	1558.3	1364.82	2098	2902.38	2305.96	2172.22	1446.49	1934.18	2511.66	1673.71	2460.19	1964.11	0.680317	0.852146	1.25257	-0.55572	-0.230827	0.324893
OTF94902.1	1	1	7.28	0.63635	1.79111	Medium	Low	OTF94902.1 putative armadillo-type fold protein [Helianthus annuus]	38217.1	26992.5	115770	30313.9	113724	121915	40878.3	17821.7	89784.4	60326.4	88650.7	49494.8	0.680496	1.21884	1.79111	-0.555342	0.285514	0.840855
OTF93865.1	3	3	28.9	0.488149	1.46917	Medium	High	OTF93865.1 putative HSP20-like chaperone [Helianthus annuus]	16159.5	19017.4	18561.8	28009.4	34548.2	16393.7	22540.6	13354.9	30001.6	17912.9	26317.1	21965.7	0.680655	0.815494	1.1981	-0.555003	-0.294254	0.260749
OTF94839.1	1	1	6.72	0.23048	1.69697	Medium	High	OTF94839.1 hypothetical protein HannXRQ_Chr15g0476491 [Helianthus annuus]	21127.9	11600.5	18846.1	15735.8	23799.6	36170.8	15114.3	12684.4	16813.9	17191.5	25235.4	14870.9	0.681246	1.15605	1.69697	-0.553753	0.209206	0.762959
OTG04166.1	3	3	52.22	0.719982	1.46589	Medium	High	OTG04166.1 putative nucleophile aminohydrolase [Helianthus annuus]	31346.3	28327.8	27516.2	60183.9	38400.9	29226.5	65967.4	14695.5	46406.5	29063.4	42603.8	42356.5	0.68218	0.686163	1.00584	-0.551776	-0.543377	0.00839954
OTF84980.1	1	1	6.19	0.711613	1.46468	Medium	High	OTF84980.1 putative 3-oxoacyl-[acyl-carrier-protein] synthase 2 [Helianthus annuus]	2445.76	2770.13	1629.45	2544.98	4611.55	2869.69	3658.96	5233.89	1072.43	2281.78	3342.07	3321.76	0.682745	0.68692	1.00612	-0.550582	-0.541786	0.00879557
OTG11819.1	1	1	12.85	0.529358	1.69294	Low	High	OTG11819.1 putative embryo-specific protein 3, (ATS3) [Helianthus annuus]	78771.5	33267.1	65689.1	118404	87654.9	54056.3	154632	43105.1	103144	59242.6	86705.2	100294	0.683264	0.59069	0.864512	-0.549484	-0.759527	-0.210043
OTG11165.1	1	1	8.44	0.525419	2.02174	Low	High	OTG11165.1 hypothetical protein HannXRQ_Chr10g0295741 [Helianthus annuus]	4213.03	4538.61	2483.99	4896.93	9079.38	2464.1	13655.4	5630.43	3429.71	3745.21	5480.14	7571.84	0.683416	0.494624	0.723752	-0.549164	-1.0156	-0.466432
XP_021996266.1	1	1	10.29	0.697915	1.46123	Medium	High	XP_021996266.1 uncharacterized protein LOC110893467 [Helianthus annuus]	7996.38	4124.24	8293.14	4548.96	18088.7	7191.41	10671.8	10665.5	6580.84	6804.59	9943.03	9306.03	0.684357	0.731201	1.06845	-0.547179	-0.451659	0.0955194
KVH98193.1	1	1	10.95	0.132155	2.33818	Low	High	KVH98193.1 Ribosomal protein L15, conserved site-containing protein [Cynara cardunculus var. scolymus]	6805.97	8065.45	6301.95	9501.75	9648.98	11783.9	11450.7	28959.1	9097.3	7057.79	10311.5	16502.4	0.684455	0.427684	0.624852	-0.546972	-1.22538	-0.678413
XP_021980766.1	1	1	9.7	0.280323	1.51678	Medium	Low	XP_021980766.1 uncharacterized protein LOC110876916 [Helianthus annuus]	2270.93	2565.93	2293.16	1986.89	4068.37	4361.69	2603.92	1811.19	2452.7	2376.67	3472.32	2289.27	0.684463	1.03818	1.51678	-0.546956	0.0540571	0.601013
KVI07134.1	1	1	7.79	0.806167	1.46077	Medium	High	KVI07134.1 hypothetical protein Ccrd_014508 [Cynara cardunculus var. scolymus]	128713	85894.9	88686.8	73624.1	206905	162514	257689	31911.2	107267	101098	147681	132289	0.68457	0.764222	1.11635	-0.546729	-0.387936	0.158793
OTG35745.1	1	1	7.77	0.160158	1.45923	Medium	High	OTG35745.1 putative leucine-rich receptor-like protein kinase family protein [Helianthus annuus]	599070	801147	848346	941527	1.12202e+06	1.21763e+06	1.08918e+06	622637	916967	749521	1.09373e+06	876260	0.685291	0.855364	1.24818	-0.545211	-0.22539	0.319821
OTG18291.1	1	1	7	0.370332	1.45954	Low	High	OTG18291.1 putative UDP-glucuronosyl/UDP-glucosyltransferase [Helianthus annuus]	14118.4	15119.1	13950.8	14304	24178.2	24510.7	16763	32078.9	14193.4	14396.1	20997.6	21011.8	0.685608	0.685146	0.999326	-0.544545	-0.545517	-0.00097213
KVE88264.1	1	1	10.4	0.440397	1.98469	Low	High	KVE88264.1 NAD(P)-binding domain-containing protein [Cynara cardunculus var. scolymus]	28145.2	21748	37151.6	18200.9	57213.5	51507	65345.6	81847.7	25563.5	29014.9	42307.2	57585.6	0.685816	0.503857	0.734683	-0.544106	-0.988913	-0.444807
AAM11626.1	1	1	6.9	0.66755	1.61515	Low	High	AAM11626.1 germacrene A synthase LTC1 [Lactuca sativa]	793.358	1234.24	802.512	473.91	240.125	3411.22	1041.44	2493.57	1036.06	943.371	1375.09	1523.69	0.686045	0.619137	0.902472	-0.543625	-0.69167	-0.148046
KVH91507.1	1	1	7.98	0.321929	1.45732	Medium	High	KVH91507.1 Protein kinase, ATP binding site-containing protein [Cynara cardunculus var. scolymus]	7786.35	5816.94	10635.5	7573.23	14349.9	13400.5	8422.41	7970.18	10243.4	8079.58	11774.5	8878.65	0.686191	0.910001	1.32616	-0.543318	-0.136059	0.407259
KVH89470.1	1	1	11.31	0.466832	1.45606	Medium	High	KVH89470.1 hypothetical protein Ccrd_008524, partial [Cynara cardunculus var. scolymus]	11986.2	9943.78	14714.3	12278.5	18109.4	22968.5	21056.5	8522.91	13796.4	12214.8	17785.5	14458.6	0.686783	0.844808	1.23009	-0.542075	-0.243305	0.29877
OTG34490.1	1	1	7.5	0.218601	1.61819	Low	High	OTG34490.1 hypothetical protein HannXRQ_Chr02g0046411 [Helianthus annuus]	4134.63	4698.83	3018.07	4081.37	6255.48	6910.58	6471.3	8567.02	4139.77	3950.51	5749.14	6392.69	0.687148	0.617973	0.89933	-0.541308	-0.694385	-0.153077
OTG35578.1	1	1	6.9	0.262536	3.29751	Low	High	OTG35578.1 putative leucine-rich repeat protein, plant-type [Helianthus annuus]	20633.3	26434.7	14235.4	20181.6	37565.1	31404.5	67931.6	117560	16657.2	20434.4	29717.1	67382.8	0.687633	0.303259	0.441019	-0.540289	-1.72138	-1.18109
OTG04557.1	2	1	15.85	0.324485	1.67727	Medium	Low	OTG04557.1 putative zein-binding domain-containing protein [Helianthus annuus]	72550.6	56067.4	72363	71566.2	140927	79538.6	67605.3	24252.2	82254.2	66993.7	97344.1	58037.2	0.688215	1.15432	1.67727	-0.539069	0.207046	0.746114
OTF97141.1	1	1	6.81	0.142306	2.10282	Low	High	OTF97141.1 putative NAD(P)-binding domain-containing protein [Helianthus annuus]	18054.6	16332.7	25352	16980.4	45585.5	24200.3	49139.1	49815.1	26666.5	19913.1	28922.1	41873.6	0.688509	0.475553	0.6907	-0.538453	-1.07232	-0.533869
XP_022032282.1	1	1	8.83	0.00109142	2.47526	Low	High	XP_022032282.1 PKS-NRPS hybrid synthetase CHGG_01239-like [Helianthus annuus]	19770	23980	16199.6	29435.3	30350.7	27192.4	40870.9	57742.4	49777.6	19983.2	28992.8	49463.6	0.689247	0.403998	0.586144	-0.536907	-1.30758	-0.770673
KVH99905.1	3	1	37.18	0.631939	1.53868	Low	High	KVH99905.1 FAD-dependent pyridine nucleotide-disulfide oxidoreductase [Cynara cardunculus var. scolymus]	1299.36	795.562	1266.95	1924.13	1875.31	1074.68	1947.68	664.087	2561.06	1120.62	1624.71	1724.28	0.689739	0.649909	0.942254	-0.535878	-0.62169	-0.0858121
OTG20133.1	1	1	8.31	0.673414	1.44969	Medium	High	OTG20133.1 putative ZPR1 zinc-finger domain protein [Helianthus annuus]	25960.3	9324.31	21510.3	34353.6	36165.8	11815.6	28571.4	1317.48	30261.3	18931.6	27445	20050.1	0.689802	0.944218	1.36883	-0.535747	-0.0828084	0.452938
XP_021977294.1	1	1	6.51	0.0173956	4.44055	Medium	Low	XP_021977294.1 laccase-12-like isoform X1 [Helianthus annuus]	2933.25	1237.78	2217.89	1977.6	3325.21	3956.61	1163.22	338.166	583.805	2129.64	3086.47	695.065	0.689992	3.06394	4.44055	-0.535349	1.61539	2.15074
OTF97664.1	5	1	70.73	0.297206	1.44896	Medium	High	OTF97664.1 putative purin-rich alpha 1 [Helianthus annuus]	3149.27	2142.88	4521.48	3509.02	5741.36	4969.2	4753.8	3441.21	3508.86	3271.21	4739.86	3901.29	0.690149	0.838495	1.21495	-0.53502	-0.254126	0.280895
KVH98328.1	1	1	9.22	0.226954	1.66215	Low	High	KVH98328.1 HAD-like domain-containing protein [Cynara cardunculus var. scolymus]	4099.73	1440.91	4007.17	4263.6	5712.61	3857.01	5900.81	3954.99	6014.12	3182.6	4611.07	5289.97	0.690209	0.601629	0.871663	-0.534895	-0.733053	-0.198157
OTG25581.1	1	1	7.08	0.173184	4.83975	Medium	Low	OTG25581.1 putative concanavalin A-like lectin/glucanase domain, Serine/threonine-protein kinase Plk3 [Helianthus annuus]	1277.24	3553.75	4600.7	9636.32	2951.44	1068.45	583.115	1638.6	599.963	3143.9	4552.07	940.56	0.690653	3.34258	4.83975	-0.533968	1.74096	2.27493
KVI00037.1	1	1	14.24	0.200838	1.67452	Medium	Low	KVI00037.1 hypothetical protein Ccrd_021695 [Cynara cardunculus var. scolymus]	4848.03	4995.45	9472.42	7854.04	9580.64	10527.5	6071.25	3155.87	7471.49	6438.63	9320.74	5566.2	0.690786	1.15674	1.67452	-0.533689	0.21006	0.74375
OTG18454.1	1	1	8.83	0.685062	1.55764	Medium	Low	OTG18454.1 putative oleosin [Helianthus annuus]	18566.2	27191.5	14792.7	52209.5	21075.7	14244.1	18528	10131.5	27534	20183.5	29176.4	18731.2	0.691773	1.07753	1.55764	-0.531629	0.107734	0.639363
KVH93775.1	1	1	10.82	0.809971	1.44443	Medium	High	KVH93775.1 26S proteasome subunit P45 [Cynara cardunculus var. scolymus]	2861.28	1437.32	4377.74	6009.33	4682.73	1840.3	3049.47	1250.61	6320.7	2892.11	4177.45	3540.26	0.692315	0.816922	1.17999	-0.530499	-0.29173	0.238769
KVH88210.1	1	1	11.99	0.516282	1.44354	Medium	High	KVH88210.1 Cystatin [Cynara cardunculus var. scolymus]	14603.3	6715.74	20872.1	13577.5	27598.8	19728.2	18889.8	11678.5	29891	14063.7	20301.5	20153.1	0.692744	0.697844	1.00736	-0.529606	-0.519024	0.0105822
KVI01997.1	1	1	8.91	0.714593	1.44319	Medium	High	KVI01997.1 protein of unknown function DUF4408 [Cynara cardunculus var. scolymus]	12321.1	8950.22	14053.7	10466.1	30031.2	10483.3	14059.8	7445.78	14256.3	11775	16993.5	11920.6	0.692911	0.987784	1.42556	-0.529258	-0.0177322	0.511526
KVH89766.1	1	1	8.87	0.164883	1.44169	Medium	High	KVH89766.1 Lipase, class 3 [Cynara cardunculus var. scolymus]	21494.1	22978	22837	35001.6	40501.2	21536.1	28487.3	28761.3	30347.3	22436.4	32346.3	29198.7	0.693629	0.768404	1.1078	-0.527763	-0.380063	0.1477
KVG40365.1	1	1	7.86	0.10513	3.09653	Medium	Low	KVG40365.1 GDP dissociation inhibitor [Cynara cardunculus var. scolymus]	59702.2	65841.3	85872.6	83986.1	59329.2	161442	24295.3	7890.98	66232.5	70472	101586	32806.3	0.69372	2.14813	3.09653	-0.527575	1.10308	1.63065
KVH92664.1	1	1	13.39	0.346534	2.83807	Low	High	KVH92664.1 hypothetical protein Ccrd_005330 [Cynara cardunculus var. scolymus]	20335.7	43106.8	14865.5	18118.5	72768.9	21927.2	97492.6	103157	21594.1	26102.7	37604.9	74081.2	0.69413	0.352352	0.507617	-0.526721	-1.50491	-0.978188
OTF90480.1	1	1	7.45	0.702675	1.44019	Medium	High	OTF90480.1 putative H(+)-ATPase 9 [Helianthus annuus]	78489.3	28214.7	49806	92631.7	33082.8	99689.8	45649.7	16910.7	96918.8	52170	75134.8	53159.8	0.694352	0.981381	1.41338	-0.52626	-0.0271144	0.499146
OTG02204.1	1	1	17.83	0.471766	1.44001	Medium	High	OTG02204.1 putative protein of unknown function DUF247, plant [Helianthus annuus]	56364	59864.6	79245	96205.1	53473.3	131805	90443.3	51668.9	58758.5	65157.9	93827.8	66956.9	0.694441	0.973131	1.40132	-0.526075	-0.0392934	0.486782
KVI01145.1	1	1	7	0.222068	1.43948	Medium	High	KVI01145.1 Copper amine oxidase, N2/N3-terminal [Cynara cardunculus var. scolymus]	37613.2	28089.9	26123.1	45901.2	42714.1	43566.9	62102.6	30757.5	34696.7	30608.7	44060.8	42518.9	0.694693	0.719884	1.03626	-0.525552	-0.474163	0.0513887
XP_022024603.1	1	1	13.77	0.552478	1.43907	Medium	High	XP_022024603.1 circumsporozoite protein-like [Helianthus annuus]	37985.1	65346.9	46706.6	80937	91410.6	43569.2	39888.7	59328.6	91404.7	50012.9	71972.3	63540.6	0.694891	0.787101	1.1327	-0.525141	-0.34538	0.179761
KVI01506.1	1	1	12.62	0.919204	1.43844	Medium	High	KVI01506.1 Alpha crystallin/Hsp20 domain-containing protein [Cynara cardunculus var. scolymus]	5798.4	3737.36	4076.43	12118.6	4686.62	2775.15	3991.34	2982.77	12434.3	4537.4	6526.79	6469.48	0.695196	0.701354	1.00886	-0.524509	-0.511785	0.0127241
AJC52328.1	2	1	19.1	0.648547	1.43823	Medium	High	AJC52328.1 farnesyl diphosphate synthase 2 [Taraxacum kok-saghyz]	9810.61	8827.67	18126.2	13314.8	26659.9	12901	9592.11	29911.6	12453.3	12254.8	17625.2	17319	0.6953	0.707594	1.01768	-0.524293	-0.499006	0.0252869
OTG21685.1	1	1	8.19	0.78102	1.99708	Medium	Low	OTG21685.1 putative DNA-binding domain-containing protein [Helianthus annuus]	746746	1.02121e+06	1.08505e+06	230487	954598	2.9122e+06	931464	245692	874486	951003	1.36576e+06	683881	0.696317	1.3906	1.99708	-0.522184	0.475705	0.997889
OTG15842.1	1	1	15.51	0.384582	3.20278	Low	High	OTG15842.1 putative PLC-like phosphodiesterases superfamily protein [Helianthus annuus]	4486.06	4620.12	2051.58	3559.45	8194.06	4259.22	26489.9	5413.88	3832	3719.25	5337.57	11911.9	0.696806	0.312229	0.448086	-0.521172	-1.67932	-1.15815
KVI11827.1	1	1	8.35	0.0289181	5.01524	Low	High	KVI11827.1 Cation-transporting P-type ATPase [Cynara cardunculus var. scolymus]	1226.82	1087.8	1007.04	2637.11	1243.9	883.014	3631.53	10234.4	2792.91	1107.22	1588.01	5552.96	0.697237	0.199392	0.285975	-0.52028	-2.32632	-1.80604
KVH93457.1	5	1	64.63	0.0691333	1.52712	Medium	Low	KVH93457.1 Fibronectin type III-like domain-containing protein [Cynara cardunculus var. scolymus]	11984.7	11023	12544.8	11875.9	20637.3	18469.4	12068	10361.8	10955.1	11850.8	16994.2	11128.3	0.697344	1.06493	1.52712	-0.520057	0.0907558	0.610813
OTG08843.1	1	1	22.15	0.245951	1.43366	Medium	High	OTG08843.1 putative glyoxalase I, Glyoxalase/Bleomycin resistance protein/Dihydroxybiphenyl dioxygenase [Helianthus annuus]	40644.2	27955.6	42668.7	52631.5	64899.8	41989.7	38048.8	30002	53129.6	37089.5	53173.7	40393.4	0.697516	0.918206	1.31639	-0.519702	-0.12311	0.396592
KVH96913.1	1	1	9	0.306938	1.43242	Medium	High	KVH96913.1 Nucleolar protein 12, partial [Cynara cardunculus var. scolymus]	22448.9	12262.5	29677.1	25537.8	32068.1	34625.6	23781.4	16929.2	27471.8	21462.9	30743.8	22727.5	0.698119	0.944358	1.35272	-0.518456	-0.0825947	0.435861
CAV24587.1	1	1	14.05	0.358485	1.66092	Low	High	CAV24587.1 unnamed protein product [Helianthus annuus]	7347.48	5913.92	5001.53	12888.4	8414.19	4856.4	8759.82	7004.76	14568.6	6087.64	8719.66	10111.1	0.698152	0.602077	0.862387	-0.518387	-0.73198	-0.213592
OTG07568.1	1	1	9.54	0.799883	1.43024	Medium	High	OTG07568.1 hypothetical protein HannXRQ_Chr11g0331891 [Helianthus annuus]	28676.7	33327.4	36794.1	70299.9	52070.7	18934.1	34696	15107.1	54888	32932.7	47101.6	34897	0.699185	0.943712	1.34973	-0.516253	-0.0835821	0.432671
OTG01032.1	1	1	7.48	0.620822	1.60585	Low	High	OTG01032.1 putative OTU domain, OTU domain-containing protein 5/Otubain-like deubiquitinase 1 [Helianthus annuus]	5948.34	75368.4	31891.9	63903.4	37452.3	60439	134304	24780.4	22711.3	37736.2	53931.5	60598.6	0.699705	0.622724	0.88998	-0.51518	-0.683335	-0.168154
OTG34002.1	6	4	92.39	0.589427	1.42865	Medium	High	OTG34002.1 putative isoflavone reductase-like protein [Helianthus annuus]	25611	35434.9	31451	68388.6	37697.1	26060	20259.5	31592.5	44706	30832.3	44048.6	32186	0.699961	0.95794	1.36856	-0.514653	-0.0619924	0.452661
KVH90670.1	1	1	16.29	0.387043	1.55429	Medium	Low	KVH90670.1 Bet v I domain-containing protein [Cynara cardunculus var. scolymus]	211799	259638	177828	174747	465873	286326	219253	159695	217430	216422	308982	198793	0.700435	1.08868	1.55429	-0.513677	0.122582	0.636259
KVI03670.1	1	1	10.5	0.499896	1.42642	Medium	High	KVI03670.1 Zinc/iron permease [Cynara cardunculus var. scolymus]	2491.99	1002.5	3237.06	2257.88	4480.4	2863.73	2867.72	2074.83	2308.04	2243.85	3200.67	2416.86	0.701056	0.928413	1.32431	-0.512397	-0.107161	0.405236
KVI10429.1	1	1	9.17	0.419037	1.84252	Low	High	KVI10429.1 hypothetical protein Ccrd_011206 [Cynara cardunculus var. scolymus]	6338.6	6597.45	7676.22	15630.6	7987.66	5768.61	13983.4	6024.24	17970.8	6870.76	9795.63	12659.5	0.701411	0.542736	0.773778	-0.511669	-0.881677	-0.370008
KVI02112.1	1	1	7.46	0.255967	1.84165	Low	High	KVI02112.1 hypothetical protein Ccrd_019597 [Cynara cardunculus var. scolymus]	15645.8	23974.9	9125.55	14126.5	36200.2	19142.7	40558.1	26932.8	22282.9	16248.8	23156.4	29924.6	0.701695	0.54299	0.773826	-0.511084	-0.881002	-0.369918
OTG16656.1	2	1	15.06	0.674522	1.4234	Medium	High	OTG16656.1 putative stress up-regulated Nod 19 [Helianthus annuus]	18004.2	22284.6	15362.2	36272	30801.3	12140.5	20680.3	13902.1	22968.1	18550.3	26404.6	19183.5	0.702541	0.966993	1.37642	-0.509346	-0.0484222	0.460923
OTG20704.1	9	1	192.18	0.630821	1.48679	Medium	Low	OTG20704.1 putative histone H2A [Helianthus annuus]	66627.4	25136.1	79468	87668.9	116055	39655	85884.7	5569.7	72240.1	57077.2	81126.3	54564.9	0.70356	1.04604	1.48679	-0.507255	0.0649421	0.572197
KVG89787.1	3	2	36.25	0.968917	1.42122	Medium	High	KVG89787.1 Plectin/S10, N-terminal [Cynara cardunculus var. scolymus]	12743	5216.15	9098.35	15629.5	20254	2571.22	15690.9	12700.4	4906	9019.18	12818.2	11099.1	0.703621	0.812606	1.15489	-0.507131	-0.299371	0.207759
ACJ49158.1	1	1	11.69	0.439888	828.609	Low	High	ACJ49158.1 protection of telomeres 1 protein [Lactuca sativa]	462.606	99.197	386.362	232.441	631.217	483.122	265.85	372.827	785019	316.055	448.927	261886	0.704023	0.00120684	0.00171421	-0.506305	-9.69455	-9.18824
KVH97061.1	3	3	34.91	0.290286	1.54534	Low	High	KVH97061.1 Like-Sm (LSM) domain-containing protein, partial [Cynara cardunculus var. scolymus]	4958.84	2935.3	3024.52	3391.69	7273.14	4794.44	4172.3	7235.84	5464.93	3639.56	5153.09	5624.36	0.706286	0.647106	0.91621	-0.501677	-0.627926	-0.126249
OTG24516.1	1	1	6.3	0.0306699	1.97083	Low	High	OTG24516.1 putative cytochrome P450 [Helianthus annuus]	40322.9	30839.9	28401.2	39588	62382	38994.3	76417.8	69864.1	49941.7	33188	46988.1	65407.9	0.706306	0.507401	0.718386	-0.501634	-0.978802	-0.477168
KVI08421.1	4	3	71.1	0.622711	1.55578	Low	High	KVI08421.1 Ricin B lectin domain-containing protein [Cynara cardunculus var. scolymus]	36853.2	42734	34065.2	59570.9	73908.8	27404.6	92709.1	53137.9	30970.8	37884.1	53628.1	58939.3	0.706423	0.642766	0.909887	-0.501395	-0.637635	-0.13624
KVH95050.1	2	1	31.22	0.373498	1.5113	Medium	Low	KVH95050.1 Lipase/lipooxygenase, PLAT/LH2 [Cynara cardunculus var. scolymus]	143316	52703.4	101735	109761	166875	144715	113860	53782.5	111157	99251.4	140450	92933.3	0.706666	1.06799	1.5113	-0.5009	0.0948928	0.595793
KVH95411.1	1	1	7.56	0.282082	2.93016	Medium	Low	KVH95411.1 EEIG1/EHBP1 N-terminal domain-containing protein [Cynara cardunculus var. scolymus]	25905.6	4676.53	31683.2	36225.3	31530.2	20274.9	12224.2	924.431	16894.3	20755.1	29343.5	10014.3	0.707316	2.07255	2.93016	-0.499573	1.0514	1.55098
XP_021990722.1	1	1	7.5	0.420648	2.2119	Medium	Low	XP_021990722.1 uncharacterized protein LOC110887331 isoform X1 [Helianthus annuus]	83994.3	51774.7	102053	60974.4	223045	52126.3	52062	26103.8	73806.1	79274	112049	50657.3	0.707496	1.56491	2.2119	-0.499205	0.646079	1.14528
OTG34257.1	1	1	7.04	0.989363	1.56824	Low	High	OTG34257.1 putative EEIG1/EHBP1 N-terminal domain-containing protein [Helianthus annuus]	1633.01	657.509	1106.14	401.284	1165.53	3233.58	324.303	777.693	4224.78	1132.22	1600.13	1775.59	0.707578	0.637657	0.901183	-0.499039	-0.649146	-0.150108
KVH90154.1	3	1	30.82	0.211733	1.96601	Low	High	KVH90154.1 Lactate dehydrogenase/glycoside hydrolase, family 4, C-terminal [Cynara cardunculus var. scolymus]	2454.31	3692.51	3747.48	4501.69	5625.41	3839.58	6272.94	9886.27	3293.08	3298.1	4655.56	6484.1	0.708421	0.508645	0.717997	-0.49732	-0.97527	-0.47795
KVI09956.1	1	1	10.04	0.0239114	2.87569	Low	High	KVI09956.1 FBD-like protein [Cynara cardunculus var. scolymus]	236018	93261.8	86424.8	209989	205796	170282	531962	321804	341673	138568	195356	398480	0.709312	0.347742	0.490253	-0.495508	-1.52391	-1.0284
OTG21934.1	1	1	6.88	0.396941	1.40848	Medium	High	OTG21934.1 putative ethylene receptor [Helianthus annuus]	31863.9	14903.3	19496.7	20387.5	35451.3	37492.7	26627.5	32381.2	23724	22088	31110.5	27577.6	0.709985	0.80094	1.12811	-0.49414	-0.320233	0.173906
KVI12041.1	1	1	12.88	0.900765	1.4077	Medium	High	KVI12041.1 Plastid lipid-associated protein/fibrillin conserved domain-containing protein [Cynara cardunculus var. scolymus]	4440.84	2656.54	6977.83	3196.3	12969.1	3648.28	6974.48	2703.18	8138.09	4691.74	6604.55	5938.58	0.710379	0.790043	1.11214	-0.493338	-0.339996	0.153342
KVI05412.1	4	1	48.19	0.491394	1.40674	Medium	High	KVI05412.1 Berberine/berberine-like protein [Cynara cardunculus var. scolymus]	2403.49	3417.26	2715.06	4130.02	5086.07	2791.56	3947.5	1548.9	3618.52	2845.27	4002.55	3038.31	0.710863	0.936465	1.31736	-0.492356	-0.0947023	0.397654
OTG27479.1	2	1	25.91	0.86032	1.40577	Medium	High	OTG27479.1 putative pectinesterase inhibitor domain, Pectin lyase fold/virulence factor [Helianthus annuus]	9066.57	3566.35	8094.31	3537.39	14308.2	11292.1	11110.1	2711.13	8404.52	6909.08	9712.54	7408.6	0.711356	0.932576	1.31098	-0.491356	-0.100707	0.390649
XP_022014878.1	1	1	7.13	0.475865	1.42615	Low	High	XP_022014878.1 glutamic acid-rich protein-like [Helianthus annuus]	7620.94	7826.72	9168.88	7492.9	9973.36	17126.6	7707.48	16037.7	11361.7	8205.51	11531	11702.3	0.711606	0.701188	0.98536	-0.490849	-0.512127	-0.0212774
KVH92917.1	1	1	6.78	0.271076	1.48073	Low	High	KVH92917.1 Cullin repeat-like-containing domain-containing protein [Cynara cardunculus var. scolymus]	5549.03	5892.83	3278.17	6680.73	9246.81	4756.68	5719.86	8842.8	7233.79	4906.68	6894.74	7265.48	0.711655	0.67534	0.948972	-0.490751	-0.566313	-0.0755625
KVH88352.1	1	1	7.81	0.0612526	1.40396	Medium	High	KVH88352.1 Zinc finger, FYVE/PHD-type [Cynara cardunculus var. scolymus]	4428.52	4042.71	4098.73	5121.45	5062.36	7463.93	5299.32	6503.37	5341.25	4189.98	5882.58	5714.64	0.712269	0.733201	1.02939	-0.489505	-0.44772	0.0417856
KVI09465.1	2	1	20.64	0.0948144	1.52198	Low	High	KVI09465.1 Peptidase M28 [Cynara cardunculus var. scolymus]	6298.84	7216.38	5202.92	10491.4	9298.73	6451.12	11434.4	8184.9	8869.33	6239.38	8747.1	9496.21	0.713308	0.657039	0.921115	-0.487402	-0.605949	-0.118547
XP_021985624.1	1	1	8.71	0.0771788	1.9989	Low	High	XP_021985624.1 uncharacterized protein LOC110881777 [Helianthus annuus]	1064.33	1083.4	1003.28	1726.2	1915.26	774.835	1789.26	2360.61	2148.7	1050.34	1472.1	2099.52	0.713498	0.500275	0.701158	-0.487018	-0.999207	-0.512189
OTG37967.1	2	1	16.18	0.3793	1.52253	Medium	Low	OTG37967.1 putative O-Glycosyl hydrolases family 17 protein [Helianthus annuus]	5314.49	3440.76	6675.11	5582.58	8652.47	7368.68	5103.92	2078.59	7006.88	5143.45	7201.24	4729.8	0.714245	1.08746	1.52253	-0.485509	0.120958	0.606467
KVI01301.1	3	2	31.25	0.47573	1.61834	Low	High	KVI01301.1 DNA/RNA-binding protein Alba-like protein [Cynara cardunculus var. scolymus]	2076.82	1225.08	2270.39	2498.41	4343.68	958.266	2733.68	3423.98	2860.21	1857.43	2600.12	3005.96	0.714364	0.617917	0.864989	-0.485269	-0.694516	-0.209247
KVH97744.1	2	2	28.82	0.764478	1.3998	Medium	High	KVH97744.1 hypothetical protein Ccrd_000145, partial [Cynara cardunculus var. scolymus]	7699.59	8399.35	7731.82	12358.4	15074.3	5925.6	15341.5	4847.97	12682.7	7943.59	11119.4	10957.4	0.714387	0.724954	1.01479	-0.485222	-0.46404	0.0211822
XP_021993870.1	1	1	6.96	0.337732	1.5363	Low	High	XP_021993870.1 uncharacterized protein LOC110890563 [Helianthus annuus]	12514.3	9651.28	5344.91	12196.9	11070.6	15241.6	15686	8313.91	18264.6	9170.17	12836.4	14088.2	0.71439	0.650913	0.911146	-0.485217	-0.619463	-0.134247
OTG21113.1	2	2	21.29	0.181557	1.39736	Medium	High	OTG21113.1 putative armadillo-type fold protein [Helianthus annuus]	142414	101220	123315	134452	187493	190816	136801	215227	145330	122316	170920	165786	0.715633	0.737796	1.03097	-0.482707	-0.438707	0.0440004
OTG03831.1	2	1	23.24	0.356084	1.54943	Low	High	OTG03831.1 putative leucine-rich repeat domain, L domain-like protein [Helianthus annuus]	9818.68	9382.26	6654.26	12286.2	15377.5	8464.84	17705.5	14583.7	7771.55	8618.4	12042.8	13353.6	0.715645	0.645399	0.901842	-0.482683	-0.631737	-0.149054
OTG19196.1	1	1	7.9	0.506183	1.77984	Medium	Low	OTG19196.1 putative ribonuclease 2 [Helianthus annuus]	5129.47	2703.03	11764.5	4912.76	9066.8	13386.7	4547.06	1959.58	8869.08	6532.34	9122.1	5125.24	0.716101	1.27454	1.77984	-0.481766	0.34998	0.831745
ADP37429.1	4	1	88.71	0.223143	1.48589	Medium	Low	ADP37429.1 alkaline leaf peroxidase [Cynara cardunculus var. scolymus]	40422.4	24108	50148.4	45340.2	45986.4	68812.6	40197.7	35827.8	31747.4	38226.2	53379.7	35924.3	0.716119	1.06408	1.48589	-0.481728	0.0896024	0.57133
KVH89964.1	1	1	9.7	0.188785	4.09346	Low	High	KVH89964.1 Bromo adjacent homology (BAH) domain-containing protein, partial [Cynara cardunculus var. scolymus]	24838.6	7729.65	10674.5	12802.7	6439.66	41134.6	112329	19709.9	44973.5	14414.2	20125.6	59004.1	0.716213	0.244292	0.341089	-0.481539	-2.03332	-1.55178
XP_022016735.1	1	1	11.61	0.368134	2.18668	Medium	Low	XP_022016735.1 uncharacterized protein LOC110916301 [Helianthus annuus]	506113	93332.6	320968	334186	657272	292723	180114	87083.6	320076	306804	428060	195758	0.716732	1.56727	2.18668	-0.480495	0.648249	1.12874
KVH92878.1	1	1	8.51	0.0519265	1.9455	Low	High	KVH92878.1 Ribosomal protein L7/L12 [Cynara cardunculus var. scolymus]	3576.2	1658.53	2148.56	3309.15	4309.18	2678.92	4691.7	5457.56	4214.93	2461.1	3432.42	4788.07	0.717015	0.514006	0.716869	-0.479924	-0.960142	-0.480218
AAM11627.1	1	1	8.85	0.572029	1.59153	Low	High	AAM11627.1 germacrene A synthase LTC2 [Lactuca sativa]	49045.2	36113.6	51415.8	77880.5	77940.5	34635.7	54678	120293	42391.2	45524.9	63485.6	72454	0.717089	0.628327	0.876219	-0.479775	-0.670412	-0.190637
AIN76709.1	1	1	7.4	0.416049	1.39442	Medium	High	AIN76709.1 salicylic acid carboxy methyl transferase [Artemisia annua]	5320.38	6585	6328.3	6713.38	12304.6	6407.38	8814.39	5744.05	8196.27	6077.9	8475.13	7584.9	0.717145	0.801315	1.11737	-0.479663	-0.319559	0.160105
KVH95750.1	2	2	26.89	0.0388971	1.72366	Low	High	KVH95750.1 Ribosomal protein S27e [Cynara cardunculus var. scolymus]	4855.57	4366.07	3983.73	5409.74	6226.97	6772.41	5321.55	9235.99	8204.05	4401.79	6136.38	7587.2	0.717327	0.58016	0.80878	-0.479297	-0.785478	-0.30618
OTF92454.1	2	2	14.36	0.801813	1.39392	Medium	High	OTF92454.1 putative F-box domain, Leucine-rich repeat domain, L domain-like protein [Helianthus annuus]	50794.9	60118.9	34525.4	33699.6	149003	20029	77031.3	62827.8	52751.5	48479.7	67577.1	64203.6	0.717399	0.755094	1.05254	-0.479152	-0.405271	0.0738806
AIJ03262.1	1	1	11.42	0.128082	1.7745	Medium	Low	AIJ03262.1 NADH dehydrogenase subunit K (chloroplast) [Perezia recurvata]	27012.3	14348.2	31940.7	31211.6	39167.2	31717	23123.7	13503.4	20907.9	24433.7	34031.9	19178.3	0.717965	1.27403	1.7745	-0.478015	0.349397	0.827412
OTF97327.1	1	1	7.78	0.239635	4.04114	Low	High	OTF97327.1 putative reticulon, NAD(P)-binding domain protein [Helianthus annuus]	455.442	18505.3	7211.21	13347.3	14687.6	8412.66	37453.6	58776.6	9534.37	8723.99	12149.2	35254.9	0.718072	0.247455	0.34461	-0.477799	-2.01476	-1.53696
KVI00467.1	3	2	37.79	0.0983419	1.68715	Medium	Low	KVI00467.1 Carbohydrate kinase PfkB [Cynara cardunculus var. scolymus]	11205.1	11897.7	15225.1	22684.6	18246.4	12440.8	11347.6	8032.39	12254.4	12776	17790.6	10544.8	0.71813	1.21159	1.68715	-0.477684	0.276901	0.754585
OTF93723.1	1	1	11	0.139572	2.12421	Low	High	OTF93723.1 hypothetical protein HannXRQ_Chr15g0464411 [Helianthus annuus]	6592.06	5142.19	6224.57	4458.13	13848.1	6699.34	8580.71	15671.5	13896.1	5986.28	8335.19	12716.1	0.718193	0.470763	0.655482	-0.477556	-1.08693	-0.609372
KVH93507.1	1	1	8.46	0.542034	1.68608	Medium	Low	KVH93507.1 hypothetical protein Ccrd_004441 [Cynara cardunculus var. scolymus]	10656.4	3369.38	17072.4	12229.7	21031.9	10004.8	11945.5	991.107	12724.4	10366	14422.1	8553.67	0.718759	1.21188	1.68608	-0.47642	0.277249	0.753669
KVI08560.1	1	1	7.83	0.583622	1.47869	Medium	Low	KVI08560.1 Armadillo [Cynara cardunculus var. scolymus]	115896	18859.3	38995.4	52539.7	89577.3	99517.9	78646.6	64070.9	20694.2	57916.9	80545	54470.6	0.719063	1.06327	1.47869	-0.47581	0.0885082	0.564318
OTF86842.1	1	1	6.34	0.494518	1.7112	Medium	Low	OTF86842.1 putative NB-ARC [Helianthus annuus]	48974.1	20603.1	198089	100767	150345	120897	52545.6	16217.3	148633	89221.9	124003	72465.1	0.719516	1.23124	1.7112	-0.474901	0.300111	0.775012
KVH94758.1	2	2	18.41	0.0999285	1.99504	Low	High	KVH94758.1 Protein of unknown function DUF1138 [Cynara cardunculus var. scolymus]	6886.4	5097.59	9854.74	7085.72	14696.3	8564.45	14799.7	18090.8	10678.6	7279.58	10115.5	14523	0.719647	0.501244	0.696514	-0.474639	-0.996415	-0.521776
KVI00309.1	1	1	13.76	0.529397	2.16393	Low	High	KVI00309.1 AAA+ ATPase domain-containing protein, partial [Cynara cardunculus var. scolymus]	67042.1	104446	67696.8	89948.2	207023	35292.6	326596	91459.9	99525	79728.4	110755	172527	0.719866	0.462121	0.641955	-0.4742	-1.11366	-0.639456
AQR55697.1	6	2	86.63	0.349372	1.42641	Medium	Low	AQR55697.1 cell wall intertase CWI2 [Cichorium intybus]	10987.2	14357.1	8455.47	19771.4	14850.2	12297.6	11494.4	6327.84	15071	11266.6	15639.7	10964.4	0.720382	1.02756	1.42641	-0.473165	0.0392193	0.512385
KVH87706.1	1	1	8.12	0.618572	2.43065	High	Low	KVH87706.1 hypothetical protein Ccrd_025008 [Cynara cardunculus var. scolymus]	1524.91	830.137	1269.21	1921.84	1432.12	1676.98	1163.39	34.8792	292.795	1208.09	1676.98	497.022	0.720395	2.43065	3.37405	-0.47314	1.28134	1.75448
OTG11388.1	1	1	6.7	0.286112	1.91416	Low	High	OTG11388.1 putative potassium transport 2/3 [Helianthus annuus]	6500.9	9757	5508.38	15609.4	9132.51	5468.54	19013.2	14624.1	8026.9	7255.43	10070.2	13888.1	0.720488	0.522422	0.725095	-0.472953	-0.936712	-0.463759
OTF93110.1	3	2	43.77	0.557591	1.38768	Medium	High	OTF93110.1 putative glycoside hydrolase family 31 [Helianthus annuus]	20160.6	17034.8	24007.8	22313.2	46225.4	16392.1	34088.3	20832	29896	20401.1	28310.2	28272.1	0.720626	0.721598	1.00135	-0.472678	-0.470733	0.00194516
KVI05245.1	1	1	7.09	0.0242496	2.15991	Low	High	KVI05245.1 C2 calcium/lipid-binding domain, CaLB [Cynara cardunculus var. scolymus]	129514	129899	171328	233664	184035	179212	387253	200996	342111	143580	198970	310120	0.721615	0.462983	0.641593	-0.470698	-1.11097	-0.640271
OTG14970.1	1	1	6.33	0.140847	3.67041	Medium	Low	OTG14970.1 hypothetical protein HannXRQ_Chr09g0255261 [Helianthus annuus]	6911.32	7800	10388.9	9241.11	6690.65	18849.6	1460.1	95.9281	7920.14	8366.73	11593.8	3158.72	0.721656	2.64877	3.67041	-0.470617	1.40532	1.87594
KVI01654.1	2	2	32.21	0.276516	2.19647	Low	High	KVI01654.1 Aspartic peptidase [Cynara cardunculus var. scolymus]	15936.5	19250.7	12964.3	31978	21592.1	13077.4	53219	37227.4	15316.8	16050.5	22215.8	35254.4	0.72248	0.455276	0.630157	-0.46897	-1.13519	-0.666216
KVH99171.1	1	1	10.73	0.700841	1.38382	Medium	High	KVH99171.1 hypothetical protein Ccrd_022606 [Cynara cardunculus var. scolymus]	64273.3	120596	49979.1	65502.3	151329	108155	134279	101672	46435	78282.8	108329	94128.5	0.722639	0.831659	1.15086	-0.468653	-0.265937	0.202716
KVH98183.1	2	2	15.01	0.308566	29.7281	Low	High	KVH98183.1 hypothetical protein Ccrd_023603 [Cynara cardunculus var. scolymus]	3503.71	4462.28	2882.5	5881.23	3840.22	5276.4	6396.96	4635.87	311472	3616.16	4999.28	107502	0.723336	0.0336382	0.0465042	-0.467262	-4.89376	-4.4265
ABL10073.1	11	2	167.14	0.424633	1.85717	Low	High	ABL10073.1 17.7 KD class I small heat-shock protein [Ageratina adenophora]	32475.6	42089.5	18258.4	62708.4	11893.5	53710.4	44233.3	59164.6	68991.2	30941.2	42770.8	57463	0.723419	0.538454	0.744318	-0.467097	-0.893106	-0.426009
OTG29940.1	1	1	6.91	0.767655	9.48536	Low	High	OTG29940.1 putative small GTPase superfamily, P-loop containing nucleoside triphosphate hydrolase [Helianthus annuus]	2381.53	1636.98	3481.12	2817.89	4001.16	3546.11	1123.63	1922.24	68090.8	2499.88	3455.05	23712.2	0.723542	0.105426	0.145708	-0.466852	-3.2457	-2.77885
XP_022008211.1	1	1	9	0.103153	2.57195	Low	High	XP_022008211.1 uncharacterized protein LOC110907556 [Helianthus annuus]	9739.71	8182.39	5420.24	8486.39	11956.3	11804.4	27705.3	23416.7	8913.41	7780.78	10749	20011.8	0.723859	0.38881	0.537134	-0.466219	-1.36286	-0.896645
OTG22173.1	3	1	33.08	0.113464	1.6588	Low	High	OTG22173.1 putative pleiotropic drug resistance protein PDR/CDR [Helianthus annuus]	3554.05	3098	4692.6	5645.6	6585.36	3438.16	7359.61	6145.81	5313.04	3781.55	5223.04	6272.82	0.724013	0.602846	0.832646	-0.465913	-0.730137	-0.264225
KVI02251.1	8	8	109.78	0.0443743	2.7226	Low	High	KVI02251.1 Nucleic acid-binding, OB-fold [Cynara cardunculus var. scolymus]	9858.01	17063.9	9338.98	26650.7	14808.8	8620.77	40754.7	28190.2	29779.2	12087	16693.4	32908	0.724055	0.367295	0.507275	-0.465828	-1.44499	-0.979159
OTG05257.1	1	1	7.03	0.0899221	2.81364	Low	High	OTG05257.1 putative pectin lyase-like superfamily protein [Helianthus annuus]	5151.91	3197.98	4539.67	3732.87	9566.67	4496.33	11757.9	18292	6216.65	4296.52	5931.95	12088.8	0.724301	0.355412	0.490696	-0.46534	-1.49244	-1.0271
KVH92455.1	1	1	7.2	0.13305	1.38062	Medium	High	KVH92455.1 F-box domain, cyclin-like protein [Cynara cardunculus var. scolymus]	14706.9	14185.4	16653.6	23241.8	23946.6	15693	16043	19706.7	17018.3	15182	20960.5	17589.3	0.724314	0.863135	1.19166	-0.465313	-0.212342	0.252971
KVH26694.1	1	1	10.46	0.490441	1.62879	Medium	Low	KVH26694.1 Ubiquitin-fold modifier 1 [Cynara cardunculus var. scolymus]	19977.4	7748.54	28792.1	19343.7	36861.4	21823.8	20158.6	7573.91	20173.6	18839.4	26009.6	15968.7	0.724323	1.17977	1.62879	-0.465295	0.238505	0.7038
OTG00036.1	1	1	11.02	0.291647	1.51276	Low	High	OTG00036.1 putative bulb-type lectin domain-containing protein [Helianthus annuus]	2607.12	1223.82	3541.52	3838.74	3873.2	2464.56	3258.46	3342.74	4551.59	2457.49	3392.17	3717.59	0.724459	0.661043	0.912463	-0.465023	-0.597185	-0.132162
AAD42963.2	3	1	57.03	0.552967	1.51937	Low	High	AAD42963.2 serine carboxypeptidase precursor [Matricaria chamomilla]	34452.9	40288.6	48480	47058	88200.6	34785.2	97658.5	42497.1	47063.2	41073.8	56681.3	62406.3	0.724645	0.658168	0.908263	-0.464653	-0.603472	-0.138819
KVI10893.1	1	1	7.23	0.160305	2.68953	Low	High	KVI10893.1 Homeodomain-like protein [Cynara cardunculus var. scolymus]	6799.38	10060.4	4893.45	13503.9	8669.23	7825.66	36201.7	10624.2	11680.3	7251.08	9999.61	19502	0.725137	0.371812	0.512747	-0.463675	-1.42736	-0.963682
OTG04099.1	1	1	13.16	0.230892	1.85937	Low	High	OTG04099.1 putative prefoldin [Helianthus annuus]	16995.8	16500	15396.5	18453.6	36148.2	12537.2	30884.8	39974.2	20049.9	16297.4	22379.7	30302.9	0.728225	0.537816	0.738531	-0.457544	-0.894814	-0.43727
KVH93724.1	2	1	16.57	0.712877	1.52637	Medium	Low	KVH93724.1 Glycerophosphoryl diester phosphodiesterase [Cynara cardunculus var. scolymus]	17833.4	7338.23	31019	15899.6	47080.5	14097	21575.3	2858.53	26063.2	18730.2	25692.4	16832.3	0.729016	1.11275	1.52637	-0.455977	0.154129	0.610106
KVI00729.1	1	1	10.56	0.625783	1.41202	Low	High	KVI00729.1 AP complex, mu/sigma subunit [Cynara cardunculus var. scolymus]	3720.9	4857.12	6331.82	6976.11	9286.25	4184.78	4420.94	11289.9	5342.14	4969.95	6815.71	7017.67	0.72919	0.708205	0.971222	-0.455634	-0.497761	-0.0421269
OTF85694.1	1	1	6.19	0.330304	1.98009	Low	High	OTF85694.1 putative alcohol acetyltransferase [Helianthus annuus]	3671.98	3445.14	2882.16	3564.36	8782.13	1361.88	8265.69	6254.72	5279.04	3333.09	4569.46	6599.82	0.729429	0.505028	0.692361	-0.455161	-0.985564	-0.530403
KVH99380.1	2	2	30.95	0.620396	1.36995	Medium	High	KVH99380.1 Protease inhibitor I4, serpin, conserved site-containing protein [Cynara cardunculus var. scolymus]	43840.3	24270.7	28998.3	37300.6	49356.1	46377.6	68123.4	31399.8	18460.4	32369.7	44344.8	39327.8	0.729956	0.823074	1.12757	-0.454119	-0.280905	0.173213
KVH92792.1	1	1	6.03	0.617172	1.36924	Medium	High	KVH92792.1 hypothetical protein Ccrd_005148 [Cynara cardunculus var. scolymus]	4738.9	4964.91	6204.71	5506.88	10029.7	6245.92	6580.41	2997.89	8411.33	5302.84	7260.84	5996.54	0.730335	0.884316	1.21084	-0.453371	-0.177366	0.276005
OTF99972.1	1	1	7	0.256933	2.42512	Low	High	OTF99972.1 putative leucine-rich repeat protein, plant-type [Helianthus annuus]	2482.32	8905.93	4424.5	8194.1	7851	5605.79	7764.88	23905.2	6677.69	5270.91	7216.97	12782.6	0.73035	0.412351	0.564593	-0.453339	-1.27806	-0.824716
KVH97296.1	1	1	10.25	0.444942	1.45232	Medium	Low	KVH97296.1 CID domain-containing protein [Cynara cardunculus var. scolymus]	77867.4	53383	55397.9	61906.2	82593.4	110944	40395.6	23686.3	111806	62216.1	85148	58629.1	0.730682	1.06118	1.45232	-0.452684	0.0856705	0.538355
ABG49445.1	1	1	22.87	0.8343	1.62014	Low	High	ABG49445.1 ATPase subunit 9 (mitochondrion) [Carthamus tinctorius]	9663.82	516.627	3544.81	6534.44	9769.7	2479.16	6354.96	271.015	15610.8	4575.08	6261.1	7412.27	0.730716	0.617231	0.844694	-0.452618	-0.696118	-0.243499
KVI08805.1	1	1	8.32	0.909532	1.63392	Low	High	KVI08805.1 AAA+ ATPase domain-containing protein [Cynara cardunculus var. scolymus]	1236.16	893.207	1254.44	2559.57	645.509	1422.6	1040.87	687.901	3800.09	1127.94	1542.56	1842.95	0.731211	0.612026	0.837003	-0.45164	-0.708336	-0.256696
AAR82893.1	9	1	125.72	0.226726	2.63198	Low	High	AAR82893.1 histone H3 protein [Cichorium intybus]	70112.5	88183.8	116742	276802	44548.2	54669.1	192688	147140	384068	91679.4	125340	241299	0.731446	0.379941	0.519439	-0.451176	-1.39615	-0.944975
OTG35984.1	2	1	14.44	0.778	1.36583	Medium	High	OTG35984.1 hypothetical protein HannXRQ_Chr01g0002621 [Helianthus annuus]	9682.28	6637.21	13793.1	9761.1	21853.8	9513.82	19301.9	6491.73	10584.3	10037.5	13709.6	12126	0.732155	0.827771	1.13059	-0.449778	-0.272696	0.177082
KVG35788.1	3	3	23.57	0.420637	1.364	Medium	High	KVG35788.1 WPP domain-containing protein [Cynara cardunculus var. scolymus]	5573.91	5604.97	8347.16	6946.8	10453.9	9232.81	5182.55	10056	9374.14	6508.68	8877.85	8204.23	0.733137	0.793333	1.08211	-0.447845	-0.334002	0.113842
KVH98171.1	6	6	98.82	0.175633	2.65147	Low	High	KVH98171.1 Ribonuclease III [Cynara cardunculus var. scolymus]	62260.7	70336.3	61265.2	61790.4	141061	61538.1	216865	230280	66874.5	64620.7	88129.7	171340	0.733246	0.37715	0.514356	-0.447631	-1.40679	-0.959159
KVH90907.1	1	1	9.74	0.920439	1.36279	Medium	High	KVH90907.1 Protein kinase, ATP binding site-containing protein [Cynara cardunculus var. scolymus]	38075.6	188473	17568.3	64732.9	263339	4607.99	145711	164183	15403.1	81372.2	110893	108432	0.733789	0.750442	1.0227	-0.446564	-0.414187	0.0323761
OTG21921.1	4	1	39.79	0.209964	1.4127	Low	High	OTG21921.1 putative phospholipid hydroperoxide glutathione peroxidase [Helianthus annuus]	4386.89	3990.66	4702.18	4137.06	7805.2	5863.46	5758.73	7478.41	5240.64	4359.91	5935.24	6159.26	0.73458	0.707862	0.963629	-0.445009	-0.498459	-0.0534503
KVI08928.1	3	1	40.94	0.101028	2.54547	Low	High	KVI08928.1 KOW-like protein [Cynara cardunculus var. scolymus]	4474.03	7865.25	7439.21	8971.57	8832.67	9118.54	20372.8	22625.4	7347.38	6592.83	8974.26	16781.9	0.734638	0.392854	0.534759	-0.444895	-1.34793	-0.903038
ACM07712.1	1	1	8.1	0.663484	1.36033	Medium	High	ACM07712.1 NBS-LRR resistance-like protein 4V, partial [Lactuca sativa]	4634.88	1119.75	4282.28	6580.77	3485.41	3587.36	2204.03	4183.86	6794.52	3345.64	4551.18	4394.14	0.735114	0.761387	1.03574	-0.443961	-0.393299	0.0506622
KVH87554.1	2	2	25.54	0.103263	1.64566	Low	High	KVH87554.1 hypothetical protein Ccrd_025166 [Cynara cardunculus var. scolymus]	4048.36	4928.96	8243.49	9810.03	6653.25	6916.76	8959.09	8531.61	10848.9	5740.27	7793.35	9446.53	0.736561	0.607659	0.824995	-0.441124	-0.718666	-0.277542
XP_021991701.1	1	1	11.71	0.2029	1.6269	Low	High	XP_021991701.1 uncharacterized protein LOC110888484 [Helianthus annuus]	14923.6	8591.8	9416.72	13744.4	18185.9	12750.4	24077.7	17738.5	11760.9	10977.4	14893.6	17859.1	0.737056	0.614667	0.833949	-0.440154	-0.702122	-0.261968
KVH94090.1	1	1	8.71	0.122719	1.50534	Low	High	KVH94090.1 Prefoldin [Cynara cardunculus var. scolymus]	8879.33	7384.84	7747.48	9287.79	12973.4	10307.1	8608.69	15192.7	12344.4	8003.88	10856.1	12048.6	0.73727	0.664301	0.901028	-0.439736	-0.590092	-0.150356
OTG08362.1	2	2	42.18	0.152922	1.60948	Low	High	OTG08362.1 putative double-stranded DNA-binding family protein [Helianthus annuus]	9654.67	8870.29	10187.8	11212.2	17804.9	9923.8	15695.1	19394.6	11122.8	9570.92	12980.3	15404.2	0.737341	0.621318	0.842648	-0.439597	-0.686595	-0.246998
OTG26950.1	1	1	9.1	0.543029	1.42962	Low	High	OTG26950.1 putative RELA/SPOT-like protein [Helianthus annuus]	6883.59	2970.86	5742.94	10418.4	6399.82	4333.52	5649.74	5907.36	10741.3	5199.13	7050.57	7432.78	0.737405	0.699486	0.948577	-0.43947	-0.515633	-0.0761629
OTG20554.1	1	1	10.22	0.0282041	3.91597	Low	High	OTG20554.1 putative parvalbumin, Protein kinase-like domain protein [Helianthus annuus]	227681	150151	205279	438198	128978	222703	623208	1.18911e+06	471128	194370	263293	761149	0.738228	0.255365	0.345916	-0.437861	-1.96937	-1.53151
KVH14836.1	2	1	26.18	0.685427	1.35381	Medium	High	KVH14836.1 Carbohydrate kinase PfkB [Cynara cardunculus var. scolymus]	2519.36	3566.03	2763.93	6358.66	3180.08	2441.55	3261.94	3650.94	2753.16	2949.77	3993.43	3222.01	0.738656	0.915507	1.23942	-0.437026	-0.127358	0.309668
KVI11465.1	1	1	13.06	0.469323	1.35268	Medium	High	KVI11465.1 cytochrome b-c1 complex subunit 8 [Cynara cardunculus var. scolymus]	3297.21	6261.81	7265.79	8161.58	8797.68	5799.38	7617.23	4181.77	6351.27	5608.27	7586.21	6050.09	0.739271	0.926972	1.2539	-0.435825	-0.109402	0.326423
XP_021986066.1	1	1	8.28	0.370092	1.89291	Medium	Low	XP_021986066.1 golgin subfamily A member 6-like protein 22 [Helianthus annuus]	10390.8	7213.19	10775	9928.41	21365	7080.06	5815.03	1602.65	12854.5	9459.65	12791.1	6757.41	0.739547	1.39989	1.89291	-0.435287	0.485317	0.920604
KVF25522.1	3	1	33.04	0.206716	3.32992	Low	High	KVF25522.1 Berberine/berberine-like protein [Cynara cardunculus var. scolymus]	6344.48	4602.7	4748.8	5012.86	10067.1	6128.49	8472.97	36716.5	7076.86	5231.99	7069.48	17422.1	0.740081	0.300308	0.405777	-0.434244	-1.73549	-1.30124
KVH90525.1	1	1	6.86	0.524893	1.39019	Medium	Low	KVH90525.1 hypothetical protein Ccrd_007437 [Cynara cardunculus var. scolymus]	262119	201522	489177	513553	394250	379475	339266	116483	470224	317606	429093	308658	0.740181	1.02899	1.39019	-0.434051	0.0412306	0.475281
ATU07262.1	1	1	11.68	0.259454	1.3508	Medium	High	ATU07262.1 expansin protein [Chrysanthemum x morifolium]	6788.13	8164.4	9773.17	8932.23	9267.03	15200.3	11150.5	11717.7	9386.83	8241.9	11133.2	10751.7	0.740301	0.766568	1.03548	-0.433817	-0.383514	0.0503025
KVI11569.1	1	1	10.72	0.178965	3.09454	Low	High	KVI11569.1 GrpE nucleotide exchange factor [Cynara cardunculus var. scolymus]	3514.78	2835.77	3442.22	4197.14	5161.19	3866.15	4097.5	20582.6	5624.02	3264.26	4408.16	10101.4	0.740504	0.32315	0.436392	-0.433421	-1.62972	-1.1963
KVH97367.1	5	1	57.93	0.0661648	2.42812	Low	High	KVH97367.1 Ribosomal protein L18a [Cynara cardunculus var. scolymus]	7251.88	7926.68	5211.96	10723.2	12516.6	4260.55	20205.9	16247.3	13057.3	6796.84	9166.75	16503.5	0.741466	0.411842	0.555442	-0.431547	-1.27984	-0.848292
KVI10256.1	8	1	181.35	0.343874	1.34808	Medium	High	KVI10256.1 Proteasome A-type subunit [Cynara cardunculus var. scolymus]	82152.3	91145.8	99853.7	90709.3	127165	150356	98246.3	136079	83293	91050.6	122743	105873	0.741796	0.860002	1.15935	-0.430905	-0.217589	0.213317
KVI08473.1	1	1	6.66	0.623008	1.34728	Medium	High	KVI08473.1 hypothetical protein Ccrd_013155 [Cynara cardunculus var. scolymus]	8772.3	5396.12	7465.61	13275.8	8581.84	7289.56	7770.38	4488.68	11988.8	7211.34	9715.73	8082.63	0.742234	0.892202	1.20205	-0.430054	-0.164557	0.265497
KVH95202.1	1	1	10.86	0.02817	1.75656	Low	High	KVH95202.1 Mitochondrial carrier domain-containing protein [Cynara cardunculus var. scolymus]	1843.3	1648.24	1359.34	2112.66	2397.06	2024.91	3597.15	2785.84	2137.85	1616.96	2178.21	2840.28	0.742333	0.569295	0.7669	-0.429861	-0.812751	-0.38289
XP_021969781.1	1	1	7.02	0.146085	5.42516	Low	High	XP_021969781.1 uncharacterized protein LOC110864660 [Helianthus annuus]	1975.9	1613.09	1118.3	1609.85	3266.36	1464.79	3508.19	2402.66	19626.9	1569.09	2113.67	8512.58	0.742356	0.184326	0.248299	-0.429817	-2.43966	-2.00985
AIT39764.1	2	2	18.35	0.615894	1.34674	Medium	High	AIT39764.1 cold-responsive protein [Ageratina adenophora]	7287.82	6936.03	5334.9	8071.51	12504.4	5764.64	10341.1	5110	10211.6	6519.58	8780.19	8554.24	0.742533	0.762146	1.02641	-0.429472	-0.391861	0.0376114
KVH96244.1	2	1	29.01	0.567542	1.3455	Medium	High	KVH96244.1 Chaperonin Cpn10 [Cynara cardunculus var. scolymus]	24862.6	12166	28035.3	37615.3	29999.1	19929	19217.5	21245.5	32240.6	21687.9	29181.1	24234.5	0.743218	0.894919	1.20411	-0.428143	-0.160172	0.267972
XP_022041787.1	1	1	8.41	0.222045	1.40721	Medium	Low	XP_022041787.1 uncharacterized protein LOC110944430 [Helianthus annuus]	7370.64	7194.96	9493.92	8610.98	14398.2	9337.7	7161.45	6293.69	9531.41	8019.84	10782.3	7662.18	0.743796	1.04668	1.40721	-0.42702	0.0658184	0.492839
KVI08376.1	5	1	71.22	0.267544	1.3444	Medium	High	KVI08376.1 PUR-alpha/beta/gamma, DNA/RNA-binding [Cynara cardunculus var. scolymus]	10570.4	9682.04	14298.5	11415.4	19031.5	16003.3	16218.7	13001.8	13444.5	11517	15483.4	14221.7	0.743826	0.809817	1.08872	-0.426962	-0.304332	0.12263
KVI01217.1	1	1	13.72	0.654674	1.34427	Medium	High	KVI01217.1 Peptidase M28 [Cynara cardunculus var. scolymus]	38815.1	32874.7	41900.1	38948.4	77516.4	36230.6	56429.4	47782.3	30992.4	37863.3	50898.5	45068.1	0.743899	0.840136	1.12937	-0.426821	-0.251305	0.175516
KVH93370.1	1	1	8.81	0.168278	1.75597	Low	High	KVH93370.1 NAD(P)-binding domain-containing protein [Cynara cardunculus var. scolymus]	33299.9	25511	23491.3	24948.4	56851.3	28805.9	55601.9	53271.4	35646.7	27434	36868.5	48173.3	0.744105	0.569486	0.765331	-0.426423	-0.812267	-0.385845
OTF99800.1	2	1	13.14	0.12572	2.71895	Medium	Low	OTF99800.1 putative zinc ion binding,DNA binding,helicase,ATP binding,nucleic acid binding protein [Helianthus annuus]	60847.2	82632.5	65149.3	65113.3	92491.9	122737	84023	14650.3	4433.45	69543	93447.3	34368.9	0.744195	2.02343	2.71895	-0.426248	1.0168	1.44305
KVH91555.1	1	1	11.8	0.996328	1.34368	Medium	High	KVH91555.1 Peptidase C13, legumain [Cynara cardunculus var. scolymus]	6616.74	7869.04	3085.97	2633.23	17201.1	3776.53	11725.8	3261.49	3817.92	5857.25	7870.28	6268.41	0.744224	0.934407	1.25555	-0.426192	-0.0978772	0.328315
OTF90861.1	2	2	26.52	0.630961	1.53354	Low	High	OTF90861.1 putative cytochrome c oxidase, subunit Vb [Helianthus annuus]	10048.1	8032.84	14380.5	14070.5	18045.2	11468	20684.2	6627.74	22469	10820.5	14527.9	16593.6	0.744805	0.652084	0.87551	-0.425066	-0.616869	-0.191804
KVI00526.1	8	1	171.49	0.473164	1.34245	Medium	High	KVI00526.1 Nucleoside diphosphate kinase [Cynara cardunculus var. scolymus]	108914	76096.8	63159.2	76151.7	140374	116630	111546	54454.2	83770.1	82723.2	111052	83256.8	0.744906	0.993591	1.33385	-0.42487	-0.00927622	0.415594
AAA19005.1	8	1	173.32	0.473164	1.34245	Medium	High	AAA19005.1 nucleoside diphosphate kinase [Flaveria bidentis]	379765	265338	220226	265529	489463	406670	388944	189873	292093	288443	387221	290304	0.744906	0.993591	1.33385	-0.42487	-0.00927622	0.415594
KVH92959.1	1	1	6.19	0.538711	1.34227	Medium	High	KVH92959.1 hypothetical protein Ccrd_005003 [Cynara cardunculus var. scolymus]	19289.9	16887.8	25658.7	31753.2	27119.6	24128.3	24866.4	7633.21	30642.6	20612.1	27667.1	21047.4	0.745007	0.97932	1.31451	-0.424675	-0.0301482	0.394527
XP_021991610.1	1	1	10.46	0.561535	1.34322	Low	High	XP_021991610.1 uncharacterized protein LOC110888390 [Helianthus annuus]	22208.3	14034.6	35016.2	48552.3	27776.7	19201.1	31090.6	24792.7	39832.9	23753	31843.4	31905.4	0.745934	0.744482	0.998055	-0.422881	-0.42569	-0.00280946
XP_021993419.1	13	4	249.93	0.219237	1.3403	Medium	High	XP_021993419.1 proteasome subunit alpha type-2-A [Helianthus annuus]	153773	150133	184896	192534	227832	234776	145583	251098	212304	162934	218381	202995	0.746101	0.80265	1.07579	-0.422557	-0.317157	0.105401
KVI05905.1	2	1	30.75	0.556496	1.33907	Medium	High	KVI05905.1 Beta-galactosidase 1-like protein [Cynara cardunculus var. scolymus]	11415.4	12459.1	10910.2	12921.7	21047.1	12610.4	20563	9715.27	11486.2	11594.9	15526.4	13921.5	0.746788	0.832881	1.11528	-0.421229	-0.263817	0.157412
KVH88723.1	2	2	21.82	0.362747	1.50972	Low	High	KVH88723.1 Calycin [Cynara cardunculus var. scolymus]	5585.51	5386.78	5696.69	6441.09	7734.47	8138.31	13232.2	5310.03	6623.29	5556.33	7437.96	8388.51	0.747023	0.662373	0.886684	-0.420775	-0.594284	-0.173509
OTG08481.1	1	1	12.23	0.792272	1.3381	Medium	High	OTG08481.1 putative NFU domain protein 5 [Helianthus annuus]	10377.7	5464.46	9142.69	10970.1	15142.6	7319.47	12267.7	3895.27	14769.4	8328.28	11144.1	10310.8	0.747328	0.807727	1.08082	-0.420186	-0.308061	0.112125
OTG26556.1	2	1	13.82	0.353298	2.65116	Medium	Low	OTG26556.1 putative kinesin motor family protein [Helianthus annuus]	4763.59	247.74	23199.6	12216.8	15687.9	9820.66	567.144	233.388	13429.2	9403.64	12575.1	4743.25	0.747798	1.98253	2.65116	-0.419279	0.987342	1.40662
KVI08817.1	1	1	15.25	0.932057	1.48531	Medium	Low	KVI08817.1 hypothetical protein Ccrd_012808 [Cynara cardunculus var. scolymus]	12248.8	11505.7	12865.5	9223.22	34723.8	5021.2	17582.9	8096.67	7288.75	12206.6	16322.7	10989.5	0.747831	1.11076	1.48531	-0.419216	0.151547	0.570763
OTG13432.1	1	1	12.47	0.079573	2.25186	Low	High	OTG13432.1 putative translation initiation factor SUI1 family protein [Helianthus annuus]	6397.7	4785.98	3995.21	7473.25	8603.78	4215.96	16657.6	7727.8	9795.31	5059.63	6764.33	11393.6	0.747987	0.444077	0.593697	-0.418915	-1.17112	-0.752202
OTF95466.1	1	1	11.33	0.490124	1.54433	Low	High	OTF95466.1 putative zinc finger, CCCH-type [Helianthus annuus]	37541.6	36228.7	32004.8	34716.5	60988.4	45581.4	83999.2	50202.9	29150	35258.4	47095.4	54450.7	0.748658	0.647528	0.864918	-0.417621	-0.626985	-0.209365
XP_021996253.1	1	1	6.93	0.68621	1.33309	Medium	High	XP_021996253.1 eukaryotic translation initiation factor 5B-like [Helianthus annuus]	2408.29	1468.04	3543.41	3937.8	3810.8	2142.58	1699.46	650.866	6035.26	2473.25	3297.06	2795.2	0.750136	0.88482	1.17955	-0.414775	-0.176544	0.238231
KVI06742.1	1	1	9.27	0.598902	1.35814	Low	High	KVI06742.1 protein of unknown function DUF221 [Cynara cardunculus var. scolymus]	2442.35	886.965	2419.72	1975.05	4174.34	1508.33	2934.05	2021.58	2852.37	1916.35	2552.57	2602.67	0.750751	0.7363	0.980752	-0.413594	-0.441634	-0.0280402
KVI00296.1	1	1	7.41	0.922003	1.33043	Medium	High	KVI00296.1 Phox/Bem1p [Cynara cardunculus var. scolymus]	23391.9	26254.6	39628	26667.3	73771.9	18334.5	49564.7	35493.2	22027.6	29758.1	39591.2	35695.2	0.751634	0.833674	1.10915	-0.411897	-0.262445	0.149452
KVH97594.1	1	1	11.66	0.481653	1.41065	Low	High	KVH97594.1 hypothetical protein Ccrd_000252, partial [Cynara cardunculus var. scolymus]	91996.4	53577	63513.7	58128.8	127184	92855	137433	80588.8	76926.4	69695.7	92722.6	98316	0.751658	0.708895	0.943108	-0.411851	-0.496357	-0.0845055
KVH97376.1	1	1	7.02	0.00706209	1.77636	Low	High	KVH97376.1 F-box domain, cyclin-like protein [Cynara cardunculus var. scolymus]	17480	17675.6	17300.6	19909.7	27204.1	22579.2	25014	34283.6	33883.5	17485.4	23231	31060.4	0.752674	0.562948	0.747931	-0.409903	-0.828925	-0.419023
OTG06217.1	5	1	60.51	0.0217669	2.83125	Low	High	OTG06217.1 putative ribosomal protein L13e [Helianthus annuus]	7491.07	8712.29	6647.83	12264.4	12560.6	5496.85	26691.3	23129	14877.1	7617.06	10107.3	21565.8	0.753623	0.353201	0.468671	-0.408085	-1.50144	-1.09335
OTG11486.1	3	3	32.5	0.0486537	1.40933	Low	High	OTG11486.1 putative protein disulfide-isomerase A6 [Helianthus annuus]	8918.04	6280.48	8918.25	11256.7	10798.4	9944.36	11606.7	9799.04	12582.7	8038.92	10666.5	11329.5	0.753663	0.709558	0.941479	-0.408008	-0.495008	-0.0869999
XP_022016018.1	8	5	93.46	0.544506	1.78829	Low	High	XP_022016018.1 isocitrate dehydrogenase [NADP] [Helianthus annuus]	15073.1	5899.28	16957.6	22297.2	17634.4	10385.7	23057.8	9118.88	35653.3	12643.3	16772.4	22610	0.753816	0.559193	0.741816	-0.407715	-0.838583	-0.430867
XP_022040877.1	2	1	12.51	0.0968837	1.61176	Low	High	XP_022040877.1 uncharacterized protein LOC110943435 [Helianthus annuus]	83542.7	51292	82990.3	91678.5	123932	73345.3	103147	126013	121920	72608.3	96318.6	117027	0.753835	0.620441	0.823047	-0.40768	-0.688633	-0.280953
OTG30183.1	1	1	12.66	0.562103	1.3259	Medium	High	OTG30183.1 putative ABI family [Helianthus annuus]	40662.3	39640.4	56547.4	37323	76733.1	67394	64703.2	67964.9	40584.2	45616.7	60483.4	57750.8	0.754203	0.789889	1.04732	-0.406976	-0.340278	0.0666981
KVH89580.1	1	1	7.41	0.445764	2.21531	Low	High	KVH89580.1 Phospholipid/glycerol acyltransferase [Cynara cardunculus var. scolymus]	4346.96	3550.88	4120.65	3462.06	6644.8	5820.31	7448.4	16140.6	3035.74	4006.17	5309.06	8874.92	0.754591	0.451403	0.598209	-0.406233	-1.14751	-0.741279
OTG10025.1	1	1	15.58	0.568221	1.73191	Medium	Low	OTG10025.1 putative receptor-like kinase in in flowers 3 [Helianthus annuus]	53234.2	27726.6	95758.7	36331.6	129860	67845	62105.1	6886.39	66141	58906.5	78012.3	45044.2	0.755092	1.30775	1.73191	-0.405275	0.387086	0.792361
KVI11855.1	1	1	7.18	0.671558	1.46418	Low	High	KVI11855.1 Protein of unknown function DUF4228 [Cynara cardunculus var. scolymus]	22488.7	88698.4	57299.6	57181.9	93053.8	72890.2	153103	52056.2	41535.1	56162.2	74375.3	82231.3	0.755119	0.682978	0.904464	-0.405223	-0.550088	-0.144865
KVI10888.1	1	1	14.24	0.268379	1.45352	Low	High	KVI10888.1 Inorganic pyrophosphatase, partial [Cynara cardunculus var. scolymus]	18890.3	17877.2	24362.1	28794.5	35108.1	17026.1	24952.9	28798	35102.3	20376.5	26976.3	29617.7	0.75535	0.687984	0.910815	-0.404783	-0.539553	-0.13477
XP_022019043.1	1	1	8.57	0.343841	1.53973	Low	High	XP_022019043.1 uncharacterized protein LOC110919074 [Helianthus annuus]	3597.88	5111.21	5333.13	8149.37	6906.42	3526.88	6686.24	5549.14	9385.88	4680.74	6194.22	7207.09	0.755662	0.649464	0.859463	-0.404187	-0.622679	-0.218492
OTG02942.1	1	1	6	0.638666	1.55795	Low	High	OTG02942.1 putative transferase, Chloramphenicol acetyltransferase-like domain protein [Helianthus annuus]	8500.64	5910.74	8185.25	9084.88	13736.9	7074.59	6154.83	20467.7	8581.9	7532.21	9965.46	11734.8	0.755832	0.641869	0.849222	-0.403863	-0.639649	-0.235786
KVI05498.1	1	1	13.54	0.590858	1.70559	Low	High	KVI05498.1 hypothetical protein Ccrd_016184 [Cynara cardunculus var. scolymus]	1029.56	473.063	1338.29	1159.1	1309.86	1289.37	58.932	246.914	4539.56	946.968	1252.78	1615.14	0.755895	0.586309	0.775648	-0.403742	-0.770267	-0.366525
OTG37412.1	1	1	6.26	0.969313	1.32292	Medium	High	OTG37412.1 hypothetical protein HannXRQ_Chr01g0018541 [Helianthus annuus]	78405.5	63332	64476.7	102722	135785	34297.5	106597	27036.4	133451	68738	90934.6	89028	0.755906	0.772095	1.02142	-0.403721	-0.37315	0.0305704
KVH89524.1	1	1	8.44	0.397901	1.68573	Low	High	KVH89524.1 hypothetical protein Ccrd_008482 [Cynara cardunculus var. scolymus]	462741	183741	128218	342637	482296	198163	646543	294939	364453	258233	341032	435312	0.757212	0.593215	0.78342	-0.401232	-0.753374	-0.352142
OTG31324.1	2	1	15.51	0.0053127	2.81907	Low	High	OTG31324.1 putative protein kinase-like domain-containing protein [Helianthus annuus]	1606.04	3097.23	2496.04	3972.66	2498.94	3035.67	6640.25	7895.68	5759.41	2399.77	3169.09	6765.11	0.757243	0.354727	0.468446	-0.401172	-1.49522	-1.09405
OTG03404.1	2	2	20.46	0.671104	1.32	Medium	High	OTG03404.1 putative beta-galactosidase 10 [Helianthus annuus]	5212.66	6452.39	6174.62	5602.46	12319.6	5626.33	10687.2	6657.93	5678.52	5946.56	7849.47	7674.55	0.757575	0.774841	1.02279	-0.40054	-0.368027	0.0325129
KVH93994.1	2	2	31.47	0.475057	1.79112	Medium	Low	KVH93994.1 Berberine/berberine-like protein [Cynara cardunculus var. scolymus]	7549.27	5201.11	8500.52	10635.7	13653	3752.61	4991.06	1622.2	9042.48	7083.64	9347.08	5218.58	0.757845	1.35739	1.79112	-0.400025	0.440834	0.840859
OTF84373.1	1	1	10.39	0.525514	1.55899	Medium	Low	OTF84373.1 putative photosystem antenna protein-like protein [Helianthus annuus]	2540.39	3979.16	7372.7	5543	3715.08	9072.16	4838.56	3064.65	3854.59	4630.75	6110.08	3919.27	0.757887	1.18154	1.55899	-0.399945	0.240663	0.640608
OTG12623.1	1	1	7.52	0.591418	1.31936	Medium	High	OTG12623.1 putative F-box domain, FBD domain, Leucine-rich repeat domain, L domain-like protein [Helianthus annuus]	14783.5	6124.18	16770	14089.1	21520.1	14101.4	17979.3	9652.06	16926	12559.2	16570.2	14852.5	0.757942	0.8456	1.11565	-0.399841	-0.241953	0.157889
XP_021991647.1	1	1	7.28	0.317868	1.59716	Low	High	XP_021991647.1 uncharacterized protein LOC110888429 [Helianthus annuus]	2506.65	1805.38	1558.72	3155.12	3177.5	1412.58	3228.92	3868.47	2279.12	1956.92	2581.73	3125.5	0.757985	0.626112	0.826022	-0.399759	-0.675507	-0.275748
KVH97692.1	1	1	11.55	0.304978	4.80626	Low	High	KVH97692.1 Glucose/ribitol dehydrogenase [Cynara cardunculus var. scolymus]	8340.13	5643.68	5771.87	9362.68	11648.8	5034.71	13659.3	6153.52	75138.1	6585.23	8682.08	31650.3	0.758485	0.208062	0.274313	-0.398807	-2.26491	-1.86611
KVI11923.1	6	4	79.78	0.569574	1.31822	Medium	High	KVI11923.1 Neutral/alkaline nonlysosomal ceramidase [Cynara cardunculus var. scolymus]	18915	19528.7	21372.9	34193.8	25143.5	19513.9	31140	14877.4	25785.9	19938.9	26283.8	23934.4	0.7586	0.833062	1.09816	-0.398589	-0.263504	0.135085
KVH95105.1	1	1	6.88	0.32978	1.9138	Medium	Low	KVH95105.1 Fatty acid desaturase, type 1 [Cynara cardunculus var. scolymus]	8053.79	6289.08	22213.1	11579.6	14025.5	22579.9	4945.11	7895.01	12337.5	12185.3	16061.7	8392.53	0.75866	1.45193	1.9138	-0.398475	0.537969	0.936443
KVH99254.1	3	2	31.15	0.00439943	1.71525	Low	High	KVH99254.1 Aspartic peptidase [Cynara cardunculus var. scolymus]	4479.55	4330.06	3939.81	5654.28	6164.92	4971.82	7841.63	8013.92	6012.87	4249.81	5597.01	7289.48	0.7593	0.583006	0.76782	-0.397259	-0.778418	-0.381159
OTG26585.1	1	1	7.35	0.249705	7.21838	Low	High	OTG26585.1 putative uridine kinase-like protein [Helianthus annuus]	1253.2	1432.02	1462.17	610.163	1966.62	2881.58	1388.44	4033.92	24515.1	1382.46	1819.45	9979.15	0.759823	0.138535	0.182326	-0.396264	-2.85167	-2.45541
ABC94481.1	1	1	6.25	0.640204	1.31586	Medium	High	ABC94481.1 putative steroid 23-alpha-hydroxylase cytochrome P450 [Artemisia annua]	7567.76	10851.9	12532	8663.05	18416.3	13648.8	5474.84	16134.8	9746.28	10317.3	13576	10452	0.75996	0.98711	1.2989	-0.396004	-0.0187176	0.377287
KVH90705.1	1	1	6.92	0.687735	1.31487	Medium	High	KVH90705.1 NOP5, N-terminal [Cynara cardunculus var. scolymus]	16390.6	6364.99	17959.1	10555.8	25241.7	17737.2	16253.3	12764.5	14387.9	13571.6	17844.9	14468.6	0.760529	0.938002	1.23335	-0.394924	-0.0923377	0.302587
OTG18331.1	7	1	141.47	0.649729	1.31449	Medium	High	OTG18331.1 putative ferritin 4 [Helianthus annuus]	17648.1	10525.3	22120.6	17330.2	23233.6	25547.2	18917	10163.8	29291.5	16764.7	22037	19457.4	0.760751	0.861608	1.13258	-0.394504	-0.214897	0.179607
KVH99584.1	2	2	25.32	0.0879282	1.44424	Medium	Low	KVH99584.1 Histidine triad (HIT) protein, partial [Cynara cardunculus var. scolymus]	10076.2	8811.41	10758.5	10718.5	13885.9	14292.3	9385.58	6807.15	10739.6	9882.06	12965.6	8977.43	0.762176	1.10077	1.44424	-0.391804	0.138509	0.530313
KVI02208.1	13	1	155.6	0.114973	1.50525	Low	High	KVI02208.1 14-3-3 domain-containing protein [Cynara cardunculus var. scolymus]	6365.04	4808.89	4667.84	5402.79	8916.96	6456.63	9010.36	8311.98	6523.47	5280.59	6925.46	7948.6	0.762489	0.664342	0.87128	-0.391211	-0.590002	-0.198791
OTF96404.1	4	2	58.09	0.658762	1.37591	Low	High	OTF96404.1 putative glycoside hydrolase, family 32 [Helianthus annuus]	35276	36881.9	28524.9	21509.7	61156.7	49364.9	64438.4	39201.1	34891.2	33560.9	44010.4	46176.9	0.762568	0.72679	0.953083	-0.391063	-0.460389	-0.0693263
OTG34625.1	1	1	7.67	0.579384	1.40162	Low	High	OTG34625.1 putative zinc finger, RING/FYVE/PHD-type [Helianthus annuus]	24349.2	56463.5	16404.7	36097	71472.7	19828.7	38724.5	51497.1	46040.6	32405.8	42466.1	45420.8	0.763098	0.713458	0.93495	-0.39006	-0.487099	-0.0970394
ACZ51443.1	2	1	21.18	0.360926	1.76618	Low	High	ACZ51443.1 peroxidase protein [Mikania micrantha]	346883	175713	112549	274930	393104	164174	573591	271634	276556	211715	277402	373927	0.763206	0.566194	0.741862	-0.389856	-0.820633	-0.430776
OTG36147.1	1	1	10.66	0.874221	1.3101	Medium	High	OTG36147.1 putative SKP1/BTB/POZ domain, NPH3 domain protein [Helianthus annuus]	12062.4	7477.78	18285.2	10872.2	29218.7	9464	17558.5	9573.29	14458.2	12608.5	16518.3	13863.3	0.763303	0.909484	1.19151	-0.389672	-0.13688	0.252792
OTG20806.1	24	3	366.86	0.122314	2.28054	Low	High	OTG20806.1 putative cobalamin-independent methionine synthase [Helianthus annuus]	11364.2	16199	7567.17	27535.3	7353.55	11119.8	30975.3	22794.8	26345.9	11710.1	15336.2	26705.4	0.763561	0.438493	0.574274	-0.389186	-1.18937	-0.800189
OTG17440.1	1	1	9.42	0.0525459	1.72592	Low	High	OTG17440.1 putative CDK inhibitor P21 binding protein [Helianthus annuus]	12140.5	6899.49	11067	10712.5	14882.7	13803.2	15082.4	20277.9	16602	10035.7	13132.8	17320.8	0.764169	0.579401	0.758211	-0.388037	-0.787367	-0.399329
OTG14463.1	3	2	31.12	0.61144	1.30826	Medium	High	OTG14463.1 putative vacuolar (H+)-ATPase G subunit [Helianthus annuus]	3886.89	4585.76	6801.28	4544.5	10080.9	5356.9	4922.5	6756.05	7236.34	5091.31	6660.76	6304.96	0.764374	0.807508	1.05643	-0.38765	-0.308451	0.0791985
KVI09800.1	1	1	7.15	0.363801	1.30785	Medium	High	KVI09800.1 hypothetical protein Ccrd_011812, partial [Cynara cardunculus var. scolymus]	57467.3	33669.1	45837.6	56589.6	74297.8	48254.1	67131.1	53748.7	46126.4	45658	59713.8	55668.7	0.764613	0.820174	1.07266	-0.387197	-0.285999	0.101199
KVI04956.1	3	3	37.94	0.181938	1.74444	Low	High	KVI04956.1 Ribosomal protein L29 [Cynara cardunculus var. scolymus]	6327.64	4723.89	4883.49	7363.88	9500.51	3974.97	11221.8	6786.14	9789.74	5311.67	6946.45	9265.88	0.76466	0.573251	0.749681	-0.38711	-0.802761	-0.415651
KVH99436.1	1	1	14.38	0.450008	1.30729	Medium	High	KVH99436.1 SCP2 sterol-binding domain-containing protein [Cynara cardunculus var. scolymus]	10603.6	13355.1	15260.2	19889.2	19043.5	12337.7	14427.5	19052.6	11743.1	13073	17090.1	15074.4	0.764942	0.867229	1.13372	-0.386578	-0.205515	0.181063
OTF85778.1	1	1	7.96	0.574988	1.48159	Medium	Low	OTF85778.1 putative C-5 cytosine methyltransferase [Helianthus annuus]	7808.26	4337.1	12163.3	13754.7	12104.1	5917.13	10060.5	564.686	10822	8102.88	10592	7149.07	0.765002	1.13342	1.48159	-0.386464	0.18068	0.567144
OTG04361.1	1	1	10.11	0.410788	1.30716	Medium	High	OTG04361.1 hypothetical protein HannXRQ_Chr12g0361411 [Helianthus annuus]	5290.86	5419.71	5913.57	7942.18	7998.16	5790.1	9124.4	5162.07	5182.61	5541.38	7243.48	6489.69	0.765016	0.853874	1.11615	-0.386437	-0.227905	0.158533
XP_022024370.1	1	1	6.24	0.161601	1.63892	Low	High	XP_022024370.1 uncharacterized protein LOC110924684 [Helianthus annuus]	7907.78	8477.6	10853.5	11182.8	8844.58	15562.9	15558.2	18758.5	10325.8	9079.64	11863.4	14880.8	0.765347	0.610157	0.797229	-0.385814	-0.712749	-0.326935
KVI11178.1	1	1	8.18	0.109984	2.34722	Low	High	KVI11178.1 Pentatricopeptide repeat-containing protein [Cynara cardunculus var. scolymus]	9291.97	8856.44	8630.93	7626.8	16657.2	10705.3	18504.8	32787.6	11564.6	8926.45	11663.1	20952.3	0.765358	0.426037	0.55665	-0.385793	-1.23095	-0.845158
KVH98544.1	2	1	17.37	0.0175354	4.89399	Low	High	KVH98544.1 Ribosomal protein S6e [Cynara cardunculus var. scolymus]	6813.21	15882.2	4544.13	17458.1	11756.7	6370.7	48484.2	58158.9	26666.9	9079.85	11861.8	44436.7	0.765468	0.204332	0.266938	-0.385586	-2.29101	-1.90542
KVH90159.1	1	1	8.97	0.779908	1.30613	Medium	High	KVH90159.1 hypothetical protein Ccrd_007837 [Cynara cardunculus var. scolymus]	13462.1	10353.9	3181.67	15907.3	13107.3	6248.06	20651.3	3719.17	5174.45	8999.23	11754.2	9848.3	0.765618	0.913785	1.19353	-0.385304	-0.130074	0.25523
ABA54490.1	1	1	11.55	0.639433	1.3627	Low	High	ABA54490.1 cytochrome b5 type 11 [Crepis alpina]	2649.8	3332.07	6359.64	3569.82	8246.96	4297.88	3444.97	5545.43	7827.36	4113.84	5371.55	5605.92	0.765856	0.733838	0.958193	-0.384855	-0.446467	-0.0616119
OTG38324.1	1	1	6.02	0.719216	1.35036	Medium	Low	OTG38324.1 putative zinc finger, RING/FYVE/PHD-type [Helianthus annuus]	5081.81	5905.44	8927.71	3966.17	11799.9	10214.4	3530.48	3512.37	12196.8	6638.32	8660.15	6413.23	0.766536	1.0351	1.35036	-0.383575	0.0497672	0.433342
KVG86437.1	1	1	7.68	0.360681	15.2063	High	Low	KVG86437.1 ARID/BRIGHT DNA-binding domain-containing protein, partial [Cynara cardunculus var. scolymus]	6563.49	10903.7	2090.99	8504.14	8814.48	8193.81	1226.36	59.8316	643.096	6519.4	8504.14	643.096	0.766615	10.1375	13.2237	-0.383426	3.34163	3.72506
KVI06285.1	1	1	9.85	0.015293	1.83683	Low	High	KVI06285.1 Regulatory factor, effector, bacterial [Cynara cardunculus var. scolymus]	3930.74	3160.18	4404.82	3902.87	6340.72	4733.64	7580	6454.85	7080.81	3831.91	4992.41	7038.55	0.767547	0.544417	0.709296	-0.381674	-0.877215	-0.495541
OTG17880.1	2	1	16.03	0.586613	1.30283	Medium	High	OTG17880.1 putative ribosomal protein S5/Elongation factor G/III/V family protein [Helianthus annuus]	36799.9	26204.9	31567.6	29187.8	42565.9	51458.6	44385.9	18312	36332.4	31524.2	41070.7	33010.1	0.767557	0.954984	1.24419	-0.381654	-0.0664513	0.315202
KVH92837.1	1	1	12.53	0.269741	1.68066	Low	High	KVH92837.1 hypothetical protein Ccrd_005154 [Cynara cardunculus var. scolymus]	28100.1	51561.7	48871.8	37278.4	76286.8	53572.5	55275.7	102698	58047.5	42844.5	55712.5	72007.2	0.769029	0.595004	0.773708	-0.378891	-0.74903	-0.370139
ACC93380.1	1	1	8.4	0.231333	1.29935	Medium	High	ACC93380.1 RNA polymerase beta subunit, partial (chloroplast) [Scaevola aemula]	39821	36413.5	36751.8	40556.5	53800.8	52451.3	52423.2	36055.4	33287.8	37662.1	48936.2	40588.8	0.769617	0.927894	1.20566	-0.377788	-0.107968	0.26982
OTF91551.1	1	1	7.14	0.2048	2.30381	Low	High	OTF91551.1 putative serine hydroxymethyltransferase 7 [Helianthus annuus]	2584.99	4828.26	3603.82	2758.13	7255.9	4298.15	7847.83	13310.9	4222.46	3672.35	4770.73	8460.39	0.769768	0.434064	0.563889	-0.377504	-1.20402	-0.826516
KVH94948.1	10	1	143.82	0.0279002	2.97572	Low	High	KVH94948.1 Histone core [Cynara cardunculus var. scolymus]	15031.6	15619.9	17596.7	16559.1	26800	19141.2	44067.9	74142.1	25363.2	16082.7	20833.5	47857.7	0.771965	0.336053	0.435321	-0.373392	-1.57324	-1.19985
CAR80453.1	13	4	194.25	0.0279002	2.97572	Low	High	CAR80453.1 unnamed protein product [Helianthus annuus]	395308	410780	462767	435480	704801	503386	1.15892e+06	1.94983e+06	667013	422952	547889	1.25859e+06	0.771965	0.336053	0.435321	-0.373392	-1.57324	-1.19985
OTG36477.1	1	1	21.76	0.196055	1.29468	Medium	High	OTG36477.1 putative peptidase S10, serine carboxypeptidase, Alpha/Beta hydrolase fold protein [Helianthus annuus]	6479.69	7254.3	7810.21	8443.47	11285.6	8163.82	7964.06	7011.58	9578.41	7181.4	9297.64	8184.68	0.772389	0.877419	1.13598	-0.3726	-0.188662	0.183938
OTG09008.1	1	1	7.8	0.943594	1.38003	Medium	Low	OTG09008.1 putative transferase, Chloramphenicol acetyltransferase-like domain protein [Helianthus annuus]	2819.12	5790.23	14897.6	3598.32	6010.4	20822	4710.47	4369.96	12970.3	7835.63	10143.6	7350.26	0.772472	1.06604	1.38003	-0.372446	0.0922551	0.464701
KVI09880.1	1	1	6.51	0.102187	3.3262	Medium	Low	KVI09880.1 Guanylyl cyclase [Cynara cardunculus var. scolymus]	14384.8	8425.14	23356.6	12271.3	30784.4	16689.9	11441.8	1496.74	5023.53	15388.8	19915.2	5987.36	0.772719	2.57022	3.3262	-0.371984	1.36189	1.73388
OTG29894.1	3	1	34.24	0.746148	1.29409	Medium	High	OTG29894.1 putative cupredoxin [Helianthus annuus]	4725.89	2717.96	4107.28	5378.65	6602.72	2966.79	4098.27	2136.8	5969.04	3850.38	4982.72	4068.04	0.772745	0.946494	1.22485	-0.371935	-0.079334	0.292601
OTG19096.1	1	1	6.78	0.729313	1.35293	Medium	Low	OTG19096.1 putative protein Networked (NET), actin-binding (NAB) domain-containing protein [Helianthus annuus]	4723.65	3623.64	6051.93	6011.12	9434.54	3167.22	3740.06	2390.09	7627.29	4799.74	6204.29	4585.81	0.773616	1.04665	1.35293	-0.37031	0.0657795	0.43609
KVI03333.1	1	1	10.6	0.42267	1.34841	Low	High	KVI03333.1 Glycosyl transferase, family 1 [Cynara cardunculus var. scolymus]	13500.9	16698.5	13838.9	16361.5	15947.1	24614.7	19169.5	26803.2	13409.1	14679.4	18974.4	19793.9	0.773643	0.741612	0.958597	-0.37026	-0.431263	-0.061003
KVI03104.1	1	1	8.64	0.15068	1.7389	Low	High	KVI03104.1 hypothetical protein Ccrd_018600 [Cynara cardunculus var. scolymus]	4854.47	7028.55	7790.67	7826.03	9331.91	8242.49	11717.2	15490.2	7003.14	6557.9	8466.81	11403.5	0.774541	0.575077	0.742474	-0.368586	-0.798174	-0.429588
OTG34809.1	2	2	14.9	0.359633	1.89135	Low	High	OTG34809.1 putative zinc finger, CCHC-type [Helianthus annuus]	137658	130600	438616	117246	525419	269499	385522	619089	332332	235624	304055	445647	0.774941	0.528724	0.682276	-0.367842	-0.919415	-0.551573
KVI06529.1	2	1	38.7	0.441792	1.76204	Medium	Low	KVI06529.1 Cysteine peptidase, asparagine active site-containing protein, partial [Cynara cardunculus var. scolymus]	6080.46	15072.2	22782.7	12056.4	16848.5	27773.7	9636.65	11084.8	11445	14645.1	18892.8	10722.1	0.775166	1.36587	1.76204	-0.367422	0.449824	0.817246
KVI00307.1	1	1	7.28	0.0567584	1.82615	Low	High	KVI00307.1 Sucrose-phosphate synthase [Cynara cardunculus var. scolymus]	11649.9	20558.8	14011.5	13620.6	21477.9	24502.9	25465	30451.3	28488.6	15406.7	19867.1	28135	0.775488	0.5476	0.706136	-0.366824	-0.868806	-0.501982
OTF99762.1	1	1	8.68	0.457701	1.80962	Medium	Low	OTF99762.1 putative leucine-rich repeat protein, plant-type [Helianthus annuus]	3536.68	1315	8453.98	5150.76	7016.42	4973.84	2962.03	981.784	5528.37	4435.22	5713.68	3157.39	0.776246	1.40471	1.80962	-0.365413	0.490272	0.855685
OTG27087.1	1	1	8.71	0.277108	1.92607	Low	High	OTG27087.1 hypothetical protein HannXRQ_Chr04g0096241 [Helianthus annuus]	33513.9	15679	5429.61	39182.4	16261	14923.4	33288.4	40617.4	31301.1	18207.5	23455.6	35069	0.776254	0.519191	0.668842	-0.3654	-0.945662	-0.580263
OTG33542.1	1	1	15	0.537843	2.33133	Low	High	OTG33542.1 putative serine carboxypeptidase-like 50 [Helianthus annuus]	1894.32	1632.07	1103.9	1090	4136.38	738.089	2293.61	1297.62	7203.52	1543.43	1988.16	3598.25	0.776313	0.428939	0.552534	-0.36529	-1.22115	-0.855864
OTF84904.1	1	1	6.27	0.943188	1.53752	Low	High	OTF84904.1 putative NAC domain-containing protein [Helianthus annuus]	4380.76	2444.39	3349.61	6040.04	2076.14	4988.59	6597.32	1124.52	7922.06	3391.59	4368.26	5214.63	0.776416	0.650398	0.837692	-0.365098	-0.620606	-0.255508
OTF99535.1	3	3	55.96	0.0453371	2.55457	Low	High	OTF99535.1 putative ribosomal protein L23/L25 [Helianthus annuus]	23649.5	25342.1	29935.3	36969.8	40595.3	24066.3	54018.6	106281	41325.2	26309	33877.1	67208.2	0.7766	0.391455	0.504063	-0.364756	-1.35308	-0.988324
KVH88113.1	1	1	14.28	0.965483	1.28675	Medium	High	KVH88113.1 Like-Sm (LSM) domain-containing protein [Cynara cardunculus var. scolymus]	7936	5164.72	10741.6	5945.42	19433.5	5300.14	11614.9	12466.7	4219.45	7947.44	10226.4	9433.68	0.777153	0.842454	1.08403	-0.36373	-0.247331	0.116399
AEI25541.1	1	1	9.28	0.740642	1.31375	Low	High	AEI25541.1 phospholipid/glycerol acyltransferase [Helianthus annuus]	31856.7	35767.7	33866.3	41769.6	64166.7	24653.8	34612.7	66238.3	32482.8	33830.2	43530.1	44444.6	0.777169	0.761177	0.979423	-0.363699	-0.393695	-0.0299958
OTG00780.1	2	1	17.07	0.299932	1.64769	Medium	Low	OTG00780.1 putative phosphoglycerate/bisphosphoglycerate mutase, active site, Histidine phosphatase superfamily [Helianthus annuus]	7106.43	4630.26	7944.77	7943.26	10947.9	6424.38	4957.13	2335.71	8071.46	6560.49	8438.52	5121.43	0.777445	1.28099	1.64769	-0.363187	0.357256	0.720443
XP_021984883.1	1	1	7.94	0.0116412	4.47697	Low	High	XP_021984883.1 uncharacterized protein LOC110880722 [Helianthus annuus]	2412.07	3879.44	1194.93	5363.49	2330.01	1932.2	12325.8	10782.2	10408.6	2495.48	3208.57	11172.2	0.777756	0.223366	0.287192	-0.362611	-2.16252	-1.79991
ACH61855.1	2	2	45.93	0.0570932	2.351	Low	High	ACH61855.1 triose phosphate isomerase, partial [Symphyotrichum sericeum]	28617.3	43028.3	16431	56207.9	32963.3	23901.8	72669.7	61785.5	72613	29358.9	37691	69022.7	0.778936	0.425351	0.546067	-0.360424	-1.23328	-0.872851
BAM66576.1	1	1	8.17	0.654436	1.38933	Medium	Low	BAM66576.1 ferulate-5-hydroxylase [Chrysanthemum x morifolium]	7079.6	3482.03	4561.55	6823.97	9014.51	3550.89	1696.5	4312.38	7947.08	5041.06	6463.12	4651.99	0.779973	1.08364	1.38933	-0.358504	0.115881	0.474385
KVH88181.1	1	1	10.08	0.724517	2.01895	Low	High	KVH88181.1 Ribosomal protein L10e/L16 [Cynara cardunculus var. scolymus]	1653.96	5756.19	4689.54	5148.8	7034.94	3326.1	5391.8	16897.3	2139.58	4033.23	5169.94	8142.91	0.78013	0.495306	0.634902	-0.358213	-1.01361	-0.655395
KVH89877.1	7	1	105.85	0.559223	1.28172	Low	High	KVH89877.1 hypothetical protein Ccrd_008128 [Cynara cardunculus var. scolymus]	25276.3	27627.2	26099.6	29745	26889.5	44625	23555.4	46466.8	28459	26334.3	33753.2	32827	0.780203	0.802214	1.02821	-0.358078	-0.31794	0.0401375
XP_022007818.1	1	1	11.2	0.788994	1.28087	Medium	High	XP_022007818.1 uncharacterized protein LOC110907095 [Helianthus annuus]	35873.8	38245.5	23791.5	60969.8	43872.6	20568.5	50585.9	41559.1	29030.5	32636.9	41803.6	40391.8	0.780721	0.808008	1.03495	-0.357122	-0.307558	0.0495634
OTG16330.1	1	1	34.85	0.206858	2.50022	Medium	Low	OTG16330.1 putative nucleotide-binding alpha-beta plait domain-containing protein [Helianthus annuus]	37816.3	17046.8	60140.8	45451.7	75358.5	26494.4	17953.6	10473.3	30489.7	38334.6	49101.5	19638.8	0.780722	1.95198	2.50022	-0.35712	0.964938	1.32206
OTF96101.1	2	1	23.92	0.977331	1.31689	Medium	Low	OTF96101.1 putative ralf-like 34 [Helianthus annuus]	4773.95	6095.79	11134	4576.38	18851.3	4726.04	10285	4505.67	6588.34	7334.59	9384.58	7126.33	0.781557	1.02922	1.31689	-0.355577	0.041557	0.397134
OTF90616.1	3	1	47.65	0.083485	2.03914	Low	High	OTF90616.1 putative trimeric LpxA-like protein [Helianthus annuus]	16755.8	12788	13828.1	13375.1	28198.9	13849.8	32020.2	36356	20065	14457.3	18474.6	29480.4	0.782551	0.490404	0.626674	-0.353744	-1.02796	-0.674214
KVH90772.1	1	1	6.18	0.710538	1.27754	Medium	High	KVH90772.1 Zinc finger, RING-CH-type [Cynara cardunculus var. scolymus]	5342.77	5918.11	5690.89	6444.35	10141.9	5070.24	6495.15	3534.42	8243.94	5650.59	7218.84	6091.17	0.782756	0.927669	1.18513	-0.353365	-0.108318	0.245047
OTF88015.1	1	1	9.31	0.0814783	3.34703	Medium	Low	OTF88015.1 putative cell division cycle 48B [Helianthus annuus]	13349	13226.5	9857.49	14657.6	17496.6	14367.5	10909.9	535.928	2453.64	12144.3	15507.2	4633.14	0.783139	2.62119	3.34703	-0.352659	1.39022	1.74288
OTF87644.1	1	1	17.94	0.479943	1.88405	Low	High	OTF87644.1 putative beta-hexosaminidase [Helianthus annuus]	4646.09	12976.8	7029.6	8013.94	12764.7	10662.4	9738.84	28939.6	7767.96	8217.48	10480.3	15482.1	0.784085	0.530772	0.676932	-0.350918	-0.913835	-0.562918
KVH98341.1	1	1	8.82	0.417305	1.51776	Medium	Low	KVH98341.1 Peptidase S24/S26A/S26B [Cynara cardunculus var. scolymus]	12329.2	7353.38	14127.7	15170	18306.5	9611.63	8252.36	5344.61	14792.4	11270.1	14362.7	9463.11	0.784676	1.19095	1.51776	-0.34983	0.252112	0.601943
XP_022035801.1	1	1	6.22	0.475398	5.15969	Medium	High	XP_022035801.1 uncharacterized protein LOC110937655 [Helianthus annuus]	1516.67	1413.53	1476.65	900.423	927.407	3783.65	1886.1	1265.07	19586.8	1468.95	1870.49	7579.32	0.785327	0.19381	0.246789	-0.348635	-2.36728	-2.01865
OTF94170.1	1	1	9.05	0.116428	1.72601	Medium	Low	OTF94170.1 putative sodium/sulfate symporter [Helianthus annuus]	22632.3	22031.3	28729.6	25476.5	25624.7	42329.3	12216	17739.5	24175.5	24464.4	31143.5	18043.7	0.785539	1.35585	1.72601	-0.348245	0.439194	0.787438
KVH91969.1	1	1	11.05	0.07047	2.34717	Low	High	KVH91969.1 hypothetical protein Ccrd_005994 [Cynara cardunculus var. scolymus]	5961.28	4742.64	5131.03	7451.83	7275.96	5416.44	9260.21	20369.1	7538.05	5278.31	6714.74	12389.1	0.786078	0.426044	0.541987	-0.347255	-1.23093	-0.88367
OTF95129.1	9	3	190.95	0.134252	1.38491	Low	High	OTF95129.1 putative 2-methylene-furan-3-one reductase [Helianthus annuus]	1.0176e+06	754467	626911	963835	1.02559e+06	1.06192e+06	906207	1.31603e+06	1.10013e+06	799659	1.01712e+06	1.10746e+06	0.786203	0.722068	0.918425	-0.347027	-0.469793	-0.122766
OTG16977.1	3	1	39.5	0.363951	2.18357	Low	High	OTG16977.1 putative pectin methylesterase 2 [Helianthus annuus]	775.219	993.578	604.712	746.434	1724.33	547.417	1075.76	3166.95	940.016	791.169	1006.06	1727.58	0.786405	0.457965	0.582353	-0.346656	-1.12669	-0.780034
XP_021989494.1	5	2	72.91	0.687738	1.82015	Low	High	XP_021989494.1 polyphenol oxidase I, chloroplastic-like [Helianthus annuus]	69542.9	72482.3	33097.2	118310	74384.7	29984.1	185185	38927	94637	58374.1	74226.3	106250	0.786435	0.549406	0.698603	-0.3466	-0.864056	-0.517455
XP_022014016.1	1	1	7.09	0.133784	2.23451	Medium	Low	XP_022014016.1 uncharacterized protein LOC110913499 [Helianthus annuus]	71850	45161.1	110889	94147.6	87117.9	108303	57946.1	16324.4	55318.6	75966.8	96522.7	43196.4	0.787036	1.75864	2.23451	-0.345499	0.814459	1.15996
KVI06627.1	2	1	25.22	0.522773	1.26978	Medium	High	KVI06627.1 cytochrome P450 [Cynara cardunculus var. scolymus]	36266.4	34831.9	25260.4	42276.2	50225.2	29852.8	38223.4	26734.8	41515	32119.5	40784.8	35491	0.787537	0.905004	1.14916	-0.34458	-0.144004	0.200575
OTG05297.1	1	1	7.75	0.449262	1.69794	Low	High	OTG05297.1 putative leucine-rich repeat domain, L domain-like protein [Helianthus annuus]	1.01252e+06	459598	288160	738259	1.11483e+06	381844	1.53629e+06	735630	716916	586759	744977	996280	0.787621	0.58895	0.747759	-0.344427	-0.763782	-0.419355
XP_021971547.1	2	1	16.8	0.110149	1.87459	Low	High	XP_021971547.1 putative protein tag-278 [Helianthus annuus]	5741.56	6509.19	4220.62	7292.89	4634.85	8978.32	11814.1	12169.1	6893.93	5490.46	6968.69	10292.4	0.787876	0.53345	0.677074	-0.34396	-0.906575	-0.562615
XP_022001130.1	1	1	9.81	0.151077	4.02944	Low	High	XP_022001130.1 sulfate transporter 1.2-like [Helianthus annuus]	3043.16	2392.22	2445.44	3660.3	4018.19	2316.12	4191.84	4337.95	23225.5	2626.94	3331.53	10585.1	0.788508	0.248173	0.314738	-0.342803	-2.01058	-1.66778
OTF98057.1	1	1	7.24	0.503429	1.7016	Medium	Low	OTF98057.1 putative epoxide hydrolase [Helianthus annuus]	6598.49	1505.86	8052.84	6846.03	7596.54	6037.89	4552.06	1302.56	6181.36	5385.73	6826.82	4012	0.788908	1.34241	1.7016	-0.342072	0.424822	0.766893
BAZ95845.1	1	1	8.14	0.477783	1.2673	Medium	High	BAZ95845.1 phosphoenolpyruvate carboxylase gene [Flaveria bidentis]	26647.3	17096.7	23742.8	22963.8	35262.5	27300	29757.9	18594.9	25265.7	22495.6	28508.7	24539.5	0.789076	0.916709	1.16175	-0.341763	-0.125464	0.216299
KVI01622.1	1	1	6.13	0.727163	2.30283	Low	High	KVI01622.1 hypothetical protein Ccrd_020103 [Cynara cardunculus var. scolymus]	4586.29	3857.21	3225.33	9037.96	2144.08	3602.12	15753.2	1693.9	9424.23	3889.61	4928.06	8957.12	0.789279	0.434248	0.550183	-0.341393	-1.20341	-0.862016
OTG19443.1	1	1	7.37	0.229879	2.77354	Low	High	OTG19443.1 putative ubiquitin family protein [Helianthus annuus]	51009.3	39093.9	63685.1	53799.6	92277.1	48748.7	133901	245911	46725.9	51262.8	64941.8	142179	0.789365	0.36055	0.456759	-0.341235	-1.47173	-1.13049
XP_021971614.1	1	1	8.98	0.571923	1.34294	Low	High	XP_021971614.1 uncharacterized protein LOC110866773 [Helianthus annuus]	20432.2	22602.7	21461.6	36348.8	30862	14489.1	33503.4	30924.2	22187.2	21498.8	27233.3	28871.6	0.789432	0.744636	0.943255	-0.341113	-0.425392	-0.0842797
OTG14473.1	1	1	9.68	0.150951	1.78329	Medium	Low	OTG14473.1 putative serine-threonine/tyrosine-protein kinase catalytic domain-containing protein [Helianthus annuus]	690451	774657	913489	891116	762565	1.35895e+06	567091	312996	809282	792866	1.00421e+06	563123	0.78954	1.40798	1.78329	-0.340915	0.493626	0.834541
OTG11699.1	2	2	23.59	0.540973	1.36575	Low	High	OTG11699.1 putative heme peroxidase [Helianthus annuus]	14461.2	13621.9	10955.1	12124.1	15921.6	21388.4	26317.7	14715.5	12283	13012.7	16478	17772.1	0.789701	0.732201	0.927187	-0.340622	-0.449689	-0.109067
OTF85777.1	10	7	214.55	0.440904	1.63613	Low	High	OTF85777.1 putative peroxidase superfamily protein [Helianthus annuus]	525764	934749	541139	688536	1.42613e+06	417421	1.47729e+06	1.05701e+06	740667	667218	844028	1.09166e+06	0.790516	0.611198	0.773163	-0.339134	-0.710289	-0.371155
OTG30323.1	1	1	6.78	0.634077	1.26496	Medium	High	OTG30323.1 putative toll/interleukin-1 receptor (TIR) domain-containing protein [Helianthus annuus]	14442.5	6589.81	21269.3	17826.9	18550.8	17132.3	21608.8	9103.02	15324.2	14100.5	17836.7	15345.4	0.790536	0.918878	1.16235	-0.339097	-0.122054	0.217043
OTF85549.1	1	1	9.77	0.051251	8.03866	Low	High	OTF85549.1 putative endoplasmic reticulum vesicle transporter protein [Helianthus annuus]	49986.3	48490.8	27460.3	50977.1	56784	51369	167925	764566	79877	41979.2	53043.3	337456	0.791413	0.124399	0.157186	-0.337498	-3.00695	-2.66946
OTG33425.1	1	1	6.31	0.541393	1.41492	Low	High	OTG33425.1 putative plant disease resistance response protein [Helianthus annuus]	19794.9	13706.5	17137	19327.2	30332.2	14324.2	18949	35114.7	17585.4	16879.5	21327.9	23883.1	0.791428	0.706755	0.893013	-0.337469	-0.500717	-0.163248
OTF94871.1	1	1	8.59	0.836168	1.56088	Medium	Low	OTF94871.1 putative START-like domain-containing protein [Helianthus annuus]	13.0136	8129.04	42.4278	10203.8	102.638	34.9677	41.2859	3312.69	6584.09	2728.16	3447.13	3312.69	0.791429	0.823548	1.04058	-0.337467	-0.280075	0.0573926
OTG01385.1	1	1	7.6	0.216109	2.18688	Low	High	OTG01385.1 putative nucleotide-binding alpha-beta plait domain-containing protein [Helianthus annuus]	15349.3	17178.1	14334.9	13157.5	31829.6	14214.2	40277.5	46311.7	15893	15620.8	19733.8	34160.7	0.791576	0.457273	0.577674	-0.3372	-1.12887	-0.791671
KVI01714.1	1	1	8.45	0.363772	1.81013	Medium	Low	KVI01714.1 KIP1-like protein [Cynara cardunculus var. scolymus]	42596	21698.2	59392.9	44356.3	75238.4	36563.7	33963.4	11351.9	40953.8	41229	52052.8	28756.4	0.792062	1.43374	1.81013	-0.336315	0.519779	0.856095
OTG37418.1	5	4	73.42	0.35188	1.67114	Low	High	OTG37418.1 putative 60S ribosomal protein L6-B [Helianthus annuus]	10083	9957.65	14327.6	17034.8	17336.5	9017.09	26123	10803.9	20507	11456.1	14462.8	19144.7	0.792107	0.598395	0.755447	-0.336232	-0.740829	-0.404597
OTF93243.1	10	3	260.97	0.234143	2.39367	Low	High	OTF93243.1 putative heme peroxidase [Helianthus annuus]	164295	243199	260699	192277	373742	277454	738232	662934	198268	222731	281158	533145	0.792192	0.417768	0.527357	-0.336078	-1.25923	-0.923148
KVI04616.1	6	5	96.04	0.0805867	1.68737	Low	High	KVI04616.1 G-protein beta WD-40 repeat-containing protein [Cynara cardunculus var. scolymus]	31942.5	26724.5	27268.9	39453.8	44347.9	24655.7	55931.7	51649.4	37424.7	28645.3	36152.5	48335.3	0.792348	0.592638	0.747951	-0.335794	-0.754778	-0.418983
XP_021985093.1	1	1	6.1	0.639008	1.45927	Low	High	XP_021985093.1 uncharacterized protein LOC110881010 [Helianthus annuus]	10355.8	7395.47	14379.6	10259.6	17227.9	13034.9	15468	7651.66	23768	10710.3	13507.5	15629.2	0.792916	0.685272	0.864243	-0.33476	-0.545251	-0.210491
OTF87555.1	1	1	17.18	0.67668	2.28238	Medium	Low	OTF87555.1 putative terpenoid cyclases/protein prenyltransferase alpha-alpha toroid [Helianthus annuus]	16870.1	66781	43517.5	116355	35597.8	8428.1	5156.67	30386.7	34725.8	42389.5	53460.3	23423.1	0.792916	1.80973	2.28238	-0.334759	0.855778	1.19054
KVH99890.1	5	2	104.54	0.0543227	2.13518	Low	High	KVH99890.1 Glutathione S-transferase, C-terminal-like protein [Cynara cardunculus var. scolymus]	50967.1	35353.7	40975.7	53986.1	75649.6	30887.4	101326	100852	69622.9	42432.2	53507.7	90600.4	0.79301	0.468344	0.59059	-0.334589	-1.09436	-0.759771
OTG24384.1	1	1	13.01	0.165541	2.08541	Low	High	OTG24384.1 putative RNA-directed DNA polymerase, eukaryota [Helianthus annuus]	123771	66367.3	89232.2	82306.2	165558	104403	256340	222756	103506	93123.4	117422	194201	0.793064	0.479522	0.604644	-0.334491	-1.06033	-0.725841
KVG72201.1	4	3	59.66	0.511307	1.26054	Low	High	KVG72201.1 Ran GTPase [Cynara cardunculus var. scolymus]	2378.25	2998.73	3438.09	2967.14	4427.28	3717.35	4039.18	2417.15	4256.46	2938.36	3703.92	3570.93	0.79331	0.822854	1.03724	-0.334044	-0.281291	0.0527528
OTG32827.1	1	1	10.25	0.570825	1.25875	Medium	High	OTG32827.1 putative tetratricopeptide-like helical domain-containing protein [Helianthus annuus]	4.52958e+07	5.18453e+07	5.30364e+07	5.45631e+07	6.57734e+07	6.86995e+07	6.86257e+07	3.29809e+07	6.78542e+07	5.00591e+07	6.3012e+07	5.64869e+07	0.794438	0.886208	1.11551	-0.331993	-0.174283	0.15771
OTG03795.1	1	1	7.87	0.344304	1.82846	Low	High	OTG03795.1 putative ribonuclease H-like domain-containing protein [Helianthus annuus]	38681.9	19941.2	12551	29921.7	44146.9	15518.5	63828.6	37687.5	28622.9	23724.7	29862.4	43379.7	0.794468	0.546908	0.688395	-0.331938	-0.87063	-0.538692
KVH90275.1	1	1	7.9	0.624862	1.25793	Medium	High	KVH90275.1 hypothetical protein Ccrd_007737 [Cynara cardunculus var. scolymus]	3914.67	7227.67	12065.6	9970.32	9135.74	10087.8	4340.93	4171.19	14786.8	7735.97	9731.28	7766.3	0.794959	0.996095	1.25301	-0.331048	-0.00564546	0.325402
XP_022007903.1	1	1	7.4	0.265784	2.33301	Medium	Low	XP_022007903.1 MAP7 domain-containing protein 1-like [Helianthus annuus]	5852	1300.35	4721.94	4555.49	7769.13	2609.46	5328.69	736.579	335.951	3958.1	4978.03	2133.74	0.795113	1.855	2.33301	-0.330767	0.891423	1.22219
KVI05032.1	2	1	20.24	0.203687	1.68188	Low	High	KVI05032.1 Cupredoxin [Cynara cardunculus var. scolymus]	12576.7	9708.81	11645.6	13792.8	15323.3	13553.6	17194.2	28340.8	11533.1	11310.4	14223.2	19022.7	0.795203	0.594572	0.747699	-0.330605	-0.750076	-0.419471
OTG35727.1	2	1	17.15	0.824176	1.62275	Low	High	OTG35727.1 putative armadillo-type fold protein [Helianthus annuus]	10103.1	3944.16	13013.6	14427.5	11504	8086.99	3525.9	25093.2	15293.9	9020.28	11339.5	14637.7	0.795473	0.616238	0.774681	-0.330114	-0.698441	-0.368327
XP_021991328.1	1	1	11.35	0.47938	1.31941	Low	High	XP_021991328.1 glutamic acid-rich protein-like [Helianthus annuus]	9080.11	15855.2	14747.9	13110	22082	14664.4	14368.9	23294.1	14695.3	13227.7	16618.8	17452.8	0.79595	0.757916	0.952216	-0.32925	-0.399889	-0.070639
KVI03665.1	1	1	10.85	0.856078	1.26	Low	High	KVI03665.1 Proliferating cell nuclear antigen, PCNA [Cynara cardunculus var. scolymus]	3930.34	2938.71	3383.11	5249.32	4950.44	2680.2	6220.98	1919.64	4777.06	3417.39	4293.32	4305.9	0.795978	0.793654	0.99708	-0.3292	-0.333419	-0.00421884
OTG26871.1	2	2	16.64	0.953458	1.25596	Medium	High	OTG26871.1 putative rho GTPase activation protein, PH domain-like, Ternary complex factor MIP1, leucine-zipper [Helianthus annuus]	7658.12	7650.48	7843.47	6535.42	16379.1	6163.62	13428.6	3991.02	9790.94	7717.36	9692.72	9070.2	0.796201	0.850848	1.06863	-0.328795	-0.233027	0.095768
XP_021979758.1	1	1	9.27	0.781182	1.25595	Medium	High	XP_021979758.1 uncharacterized protein LOC110875870 [Helianthus annuus]	7118.28	4941.1	9654.42	9916.1	12181.1	5174.23	7064.53	5759.15	9865.77	7237.93	9090.46	7563.15	0.796212	0.957	1.20194	-0.328776	-0.0634092	0.265367
KVH85693.1	3	3	40.11	0.369876	1.38894	Low	High	KVH85693.1 Calcium-binding EF-hand [Cynara cardunculus var. scolymus]	8680.18	7243.14	12695.8	9755.93	16011.7	10167.1	12304.1	17108.2	10338	9539.71	11978.2	13250.1	0.79642	0.719974	0.904012	-0.328398	-0.473984	-0.145586
XP_021985206.1	1	1	7.86	0.0278535	14.317	Low	High	XP_021985206.1 uncharacterized protein LOC110881159 [Helianthus annuus]	191.941	341.631	140.04	414.91	239.263	191.077	695.243	1296.62	7652.27	224.538	281.75	3214.71	0.79694	0.0698469	0.0876439	-0.327457	-3.83966	-3.5122
OTG07710.1	1	1	6.52	0.00637381	2.50311	Low	High	OTG07710.1 hypothetical protein HannXRQ_Chr11g0333521 [Helianthus annuus]	9299.96	12186.1	11887.2	14593.8	13889	13375.6	24234.9	39212.6	20089.4	11124.4	13952.8	27845.6	0.797289	0.399503	0.501077	-0.326825	-1.32372	-0.996896
OTG22314.1	2	2	17.53	0.597403	1.25403	Medium	High	OTG22314.1 putative transcription factor GRAS [Helianthus annuus]	8251.87	9901.67	4332.5	12475	8140.64	7582.62	8499.7	8134.58	6667.79	7495.35	9399.41	7767.36	0.797427	0.964981	1.21012	-0.326575	-0.0514281	0.275147
KVI09892.1	2	2	20.61	0.174129	2.36986	Low	High	KVI09892.1 Pleckstrin homology domain-containing protein [Cynara cardunculus var. scolymus]	4955.61	5025.65	4949.28	5639.87	7894.27	5187.73	7808.75	21495.3	6079.32	4976.85	6240.62	11794.4	0.797492	0.421966	0.529116	-0.326458	-1.2448	-0.918345
KVI11104.1	1	1	14.73	0.193258	1.73442	Low	High	KVI11104.1 Galactose-binding domain-like protein, partial [Cynara cardunculus var. scolymus]	20095.9	23710.1	18012.8	24535.4	28500.4	24456.5	29597.6	55230.2	22391.9	20606.3	25830.8	35739.9	0.797741	0.576562	0.722743	-0.326007	-0.794454	-0.468446
OTF93295.1	4	1	53.36	0.728754	1.25321	Medium	High	OTF93295.1 putative glycoside hydrolase family 38, N-terminal domain-containing protein [Helianthus annuus]	23401.3	6960.37	16710.6	13145.7	23215.9	22629.9	15489.3	12025.3	28122.7	15690.8	19663.8	18545.8	0.797951	0.846058	1.06029	-0.325628	-0.241172	0.0844556
KVI07638.1	1	1	8	0.132201	4.02216	Low	High	KVI07638.1 Uncharacterized protein family UPF0047 [Cynara cardunculus var. scolymus]	4696.49	2001.65	3535.17	5706.03	4037.66	3073.66	9264.46	27636.5	4259.09	3411.1	4272.45	13720	0.798396	0.248622	0.311403	-0.324824	-2.00797	-1.68315
CAX69289.1	7	2	95.72	0.828485	1.25233	Medium	High	CAX69289.1 unnamed protein product, partial [Helianthus annuus]	36243.2	12896	26975.4	33612.2	44580.4	17128.2	23608.4	17246.8	38264.4	25371.6	31773.6	26373.2	0.798511	0.962021	1.20477	-0.324616	-0.0558592	0.268757
OTF94016.1	1	1	6.17	0.306723	1.86087	Low	High	OTF94016.1 putative F-box associated interaction domain-containing protein [Helianthus annuus]	739076	800618	529355	1.25575e+06	898855	435787	1.84739e+06	751438	1.25141e+06	689683	863463	1.28341e+06	0.798741	0.537383	0.672787	-0.3242	-0.895979	-0.571778
KVH96278.1	1	1	6.51	0.732041	1.36874	Low	High	KVH96278.1 cytochrome P450 [Cynara cardunculus var. scolymus]	10527.8	4614.72	3370.39	11731.3	7508.94	3936.86	13613	6148.77	5577.65	6170.97	7725.69	8446.48	0.79876	0.730596	0.914663	-0.324166	-0.452853	-0.128687
KVI06579.1	1	1	9.71	0.0877229	1.43965	Low	High	KVI06579.1 Nucleotide-diphospho-sugar transferase [Cynara cardunculus var. scolymus]	27873	31015.3	22867.3	27730.9	39208.4	35401	42433.6	42865.6	32399.9	27251.9	34113.4	39233.1	0.798861	0.694615	0.869507	-0.323984	-0.525715	-0.201731
OTG29591.1	4	1	64.82	0.162427	1.50132	Low	High	OTG29591.1 putative epoxide hydrolase [Helianthus annuus]	18928.6	19382.1	16699.8	18806.5	25435.9	24599.6	28611.8	34938.1	19038.8	18336.8	22947.3	27529.6	0.799084	0.666078	0.833553	-0.323581	-0.586236	-0.262655
CBD33198.1	2	2	38.29	0.600559	1.3523	Medium	High	CBD33198.1 unnamed protein product [Helianthus annuus]	12662.4	5099.95	7120.95	12068.4	11456.5	7603.79	8034.23	3260.65	11724.2	8294.42	10376.2	7673.03	0.799367	1.08098	1.3523	-0.32307	0.112346	0.435416
KVE22442.1	3	3	42.95	0.758451	1.24991	Medium	High	KVE22442.1 Plastid lipid-associated protein/fibrillin conserved domain-containing protein [Cynara cardunculus var. scolymus]	19859.3	15865.4	21177.3	17019.8	36430.6	17671.8	27579.8	20607.2	18152.9	18967.3	23707.4	22113.3	0.800059	0.857734	1.07209	-0.321822	-0.221398	0.100424
KVH95064.1	3	2	26.23	0.468807	1.34733	Low	High	KVH95064.1 Fumarylacetoacetase, C-terminal [Cynara cardunculus var. scolymus]	13621.3	8661.23	13443.5	10982.2	22711.4	10944.5	13875.3	16529.5	17730	11908.7	14879.4	16044.9	0.800349	0.742211	0.92736	-0.321299	-0.430098	-0.108799
XP_021995627.1	2	2	17.61	0.992781	1.24936	Medium	High	XP_021995627.1 uncharacterized protein LOC110892787 [Helianthus annuus]	8631.76	8474.6	11810.1	20259.3	11693.7	4173.86	13833.6	9053.86	7795.28	9638.8	12042.3	10227.6	0.800413	0.942433	1.17743	-0.321184	-0.085538	0.235646
OTG24702.1	1	1	7.26	0.671614	1.39338	Low	High	OTG24702.1 putative bicarbonate transporter, eukaryotic [Helianthus annuus]	8528.19	8036.83	8091.39	9796.48	10872.1	10129.5	6154.81	19202.4	8998.54	8218.81	10266	11451.9	0.800583	0.71768	0.896447	-0.320877	-0.478586	-0.157709
OTG38257.1	1	1	13.02	0.47368	1.64505	Medium	Low	OTG38257.1 putative AMP-dependent synthetase/ligase, AMP-binding enzyme C-terminal domain protein [Helianthus annuus]	37518.9	16812.4	53122.1	28330.3	45030.1	60708.4	23102.6	12505.8	45889.6	35817.8	44689.6	27166	0.801479	1.31848	1.64505	-0.319264	0.398872	0.718136
KVH99193.1	4	4	90.13	0.0640156	3.92076	Low	High	KVH99193.1 hypothetical protein Ccrd_022569 [Cynara cardunculus var. scolymus]	12831.4	17071.9	10076.6	24239.5	17076.3	8566.67	42652.9	92462.2	21636.4	13326.6	16627.5	52250.5	0.801482	0.255053	0.318227	-0.319258	-1.97113	-1.65187
OTG34658.1	1	1	6.14	0.705002	1.34509	Low	High	OTG34658.1 hypothetical protein HannXRQ_Chr02g0048211 [Helianthus annuus]	551373	525705	353329	472979	881153	430481	979700	526359	417971	476802	594871	641343	0.801522	0.743443	0.927539	-0.319185	-0.427706	-0.10852
KVI00331.1	1	1	9.81	0.390238	2.20178	Medium	Low	KVI00331.1 HIP116 protein [Cynara cardunculus var. scolymus]	2948.92	1162.94	11963.4	6366.03	8083.9	5592.69	2305.85	942.702	5854.37	5358.41	6680.87	3034.31	0.802053	1.76594	2.20178	-0.318231	0.820439	1.13867
KVI11230.1	2	1	25.95	0.34095	1.64239	Medium	Low	KVI11230.1 Aspartic peptidase [Cynara cardunculus var. scolymus]	3516.68	1855.51	3033.76	2545.64	5425.77	2508.47	2256.94	2357.91	1766	2801.98	3493.29	2126.95	0.802105	1.31737	1.64239	-0.318137	0.397662	0.7158
KVH87995.1	1	1	8.57	0.426468	1.75919	Medium	Low	KVH87995.1 Concanavalin A-like lectin/glucanase, subgroup [Cynara cardunculus var. scolymus]	4187.53	1642.6	4262.04	3625.7	5527.22	3407.15	3330.66	220.047	3588.97	3364.06	4186.69	2379.89	0.803512	1.41353	1.75919	-0.315608	0.499307	0.814915
KVI09839.1	1	1	11.04	0.529073	1.42634	Low	High	KVI09839.1 Peptidyl-prolyl cis-trans isomerase, FKBP-type [Cynara cardunculus var. scolymus]	5440.9	6670.26	4749.07	4613.04	8394.83	7955	10527.4	8775.89	4745.12	5620.08	6987.62	8016.15	0.80429	0.701095	0.871694	-0.314212	-0.512319	-0.198107
KVI07417.1	1	1	13.13	0.870927	1.24301	Medium	High	KVI07417.1 hypothetical protein Ccrd_014206 [Cynara cardunculus var. scolymus]	4215.85	2685.09	3525.75	3697.91	6647.74	2614.85	4357.73	2479.8	5073.61	3475.56	4320.17	3970.38	0.804497	0.875373	1.0881	-0.313841	-0.192031	0.121811
OTF98585.1	1	1	11.06	0.64558	1.37974	Low	High	OTF98585.1 putative protein kinase-like domain-containing protein [Helianthus annuus]	14929	16904.5	10568.2	19550.2	11377.8	21765.3	27050.3	20365.6	11087.3	14133.9	17564.4	19501.1	0.804689	0.724776	0.900691	-0.313498	-0.464393	-0.150895
KVI05142.1	1	1	9.3	0.471182	1.45292	Low	High	KVI05142.1 Disease resistance protein [Cynara cardunculus var. scolymus]	6008.71	6817.32	5829.78	6654.19	11171.8	5357.37	12840.7	8073.66	6191	6218.6	7727.79	9035.13	0.804706	0.68827	0.855306	-0.313466	-0.538954	-0.225488
OTF87962.1	2	1	20.25	0.845709	1.24448	Low	High	OTF87962.1 putative serine carboxypeptidase S28 family protein [Helianthus annuus]	10599.9	15710.4	9566.12	11712.6	12572.9	20277.3	8923.08	8716.33	27008.2	11958.8	14854.3	14882.5	0.805075	0.803545	0.9981	-0.312805	-0.315548	-0.00274313
KVH93102.1	1	1	6	0.73904	1.24181	Medium	High	KVH93102.1 Extracellular ligand-binding receptor [Cynara cardunculus var. scolymus]	15471.7	15867.4	27172.8	15143.9	37708.6	19807.9	28549.8	21136	20606.3	19504	24220.1	23430.7	0.805278	0.83241	1.03369	-0.31244	-0.264634	0.0478064
KVI12548.1	1	1	6.77	0.522138	1.39704	Medium	Low	KVI12548.1 Peptidase S9, prolyl oligopeptidase, catalytic domain-containing protein [Cynara cardunculus var. scolymus]	94999	44702.7	80065.3	77219.4	117683	77844.7	49942.5	14060.8	131229	73255.7	90915.8	65077.3	0.805753	1.12567	1.39704	-0.311591	0.170786	0.482377
KVH95901.1	2	1	27.79	0.438255	1.24083	Medium	High	KVH95901.1 Calcium-binding EF-hand [Cynara cardunculus var. scolymus]	4222.77	6367.66	5980.58	5739.1	6603.63	8219.01	4898.27	7253.69	5386.59	5523.67	6853.91	5846.18	0.805915	0.944834	1.17237	-0.311301	-0.0818679	0.229433
KVH90285.1	8	3	107.27	0.412051	1.24016	Medium	High	KVH90285.1 Ribosomal protein L6, partial [Cynara cardunculus var. scolymus]	19386.8	14517.6	23866.5	28863.6	22757.1	20024.5	23435.1	18800.3	22215.3	19257	23881.7	21483.6	0.806348	0.896358	1.11163	-0.310526	-0.157853	0.152673
OTF98209.1	1	1	7.08	0.551336	1.37282	Medium	Low	OTF98209.1 putative glutamate receptor 3.6 [Helianthus annuus]	4711.8	4272.97	6402.31	7320.12	7308.65	4453.42	5768.81	393.293	7737.91	5129.02	6360.73	4633.34	0.806358	1.10698	1.37282	-0.310508	0.146633	0.45714
XP_022008109.1	1	1	8.33	0.712483	1.44575	Medium	Low	XP_022008109.1 uncharacterized protein LOC110907434 [Helianthus annuus]	64296.6	20153.4	53925.9	52592.9	87660.4	31049.4	64866.3	18218	35402.8	46125.3	57100.9	39495.7	0.807786	1.16786	1.44575	-0.307956	0.223862	0.531818
KVI03119.1	1	1	10.17	0.162531	1.38621	Low	High	KVI03119.1 Protein kinase, catalytic domain-containing protein [Cynara cardunculus var. scolymus]	11346	8245.34	6528.22	9169.07	11282	11881.4	11641.9	13834.3	10730.9	8706.53	10777.5	12069	0.807845	0.721394	0.892986	-0.30785	-0.471141	-0.163291
OTG02582.1	1	1	8.7	0.69682	1.36444	Low	High	OTG02582.1 putative fructose-bisphosphate aldolase 1 [Helianthus annuus]	46718.9	23975.3	21572.2	48242.9	44618.3	21346.4	65116.6	30332.2	30442.9	30755.5	38069.2	41963.9	0.807883	0.732903	0.907189	-0.307781	-0.448305	-0.140524
OTG08258.1	1	1	6.47	0.529314	1.48809	Medium	Low	OTG08258.1 putative pleiotropic drug resistance 5 [Helianthus annuus]	36141.9	31707.4	69650.4	57595	77087.7	35470.9	33294	19222.1	61827.2	45833.2	56717.9	38114.4	0.808091	1.20252	1.48809	-0.30741	0.266056	0.573466
KVH91676.1	1	1	21.86	0.309081	1.35042	Low	High	KVH91676.1 cytochrome b5-like heme/steroid binding domain-containing protein [Cynara cardunculus var. scolymus]	20095.9	32749	22210.1	23387.4	37448.8	32019	34286.8	39766.2	27303	25018.3	30951.7	33785.4	0.808301	0.740508	0.916129	-0.307035	-0.433412	-0.126377
XP_022001492.1	1	1	7.16	0.88243	1.23692	Medium	High	XP_022001492.1 U3 snoRNP-associated protein-like YAOH isoform X1 [Helianthus annuus]	76458.6	76019	40143.7	96102.3	99060.2	43095.5	130924	36007.6	50271.2	64207.1	79419.3	72400.9	0.808457	0.886827	1.09694	-0.306757	-0.173275	0.133482
OTG29976.1	2	2	13.88	0.226705	1.70421	Medium	Low	OTG29976.1 Encodes a Protein of unknown function that is a marker for oxidative stress response [Helianthus annuus]	10110.6	7433.04	10576.8	8285.46	17897.1	8586.85	5003.44	7850.06	7548.61	9373.47	11589.8	6800.7	0.80877	1.37831	1.70421	-0.306199	0.4629	0.769099
KVI05849.1	1	1	7.3	0.285794	5.85571	Low	High	KVI05849.1 Alpha/beta hydrolase fold-1 [Cynara cardunculus var. scolymus]	21711.9	40132.3	21798.4	20530.3	31296.3	51577.1	83927.7	384315	21544.3	27880.9	34467.9	163262	0.808893	0.170773	0.21112	-0.305979	-2.54985	-2.24387
XP_021979079.1	1	1	9.19	0.361992	1.85587	Low	High	XP_021979079.1 cucumber peeling cupredoxin-like [Helianthus annuus]	14415.1	14724.3	14562.7	14533.4	25990.2	13463.5	28827.7	39966.9	12310.8	14567.4	17995.7	27035.1	0.809493	0.538831	0.66564	-0.30491	-0.892096	-0.587186
KVH97762.1	2	2	19.58	0.745034	1.23526	Medium	High	KVH97762.1 hypothetical protein Ccrd_000099 [Cynara cardunculus var. scolymus]	5430.91	2563.25	6230.44	7074.78	6867.45	3628.85	5107.42	4127.63	7060.39	4741.53	5857.03	5431.81	0.809546	0.872919	1.07828	-0.304815	-0.19608	0.108735
KVH99822.1	6	1	76.63	0.730304	1.23509	Medium	High	KVH99822.1 Ribosomal protein L6 [Cynara cardunculus var. scolymus]	6460.61	4183.49	6151.9	9496.3	6916.34	4331.96	7180.38	5939.95	5655.01	5598.67	6914.87	6258.45	0.809656	0.894578	1.10489	-0.304618	-0.160721	0.143897
KVI04133.1	1	1	8.13	0.37725	1.28248	Low	High	KVI04133.1 Aldo/keto reductase, partial [Cynara cardunculus var. scolymus]	11245.5	10043.3	9320.83	10783.1	15759.5	11262.2	11124.1	17277.2	10854.9	10203.2	12601.6	13085.4	0.809676	0.77974	0.963028	-0.304584	-0.358935	-0.0543505
OTG09831.1	2	2	15.23	0.41834	1.33175	Low	High	OTG09831.1 putative chromatin remodeling 8 [Helianthus annuus]	32263.6	44785.4	33620	31102.3	61523	44017.1	53399.2	55179.4	38804.6	36889.7	45547.5	49127.7	0.809917	0.750893	0.927123	-0.304154	-0.413321	-0.109167
OTG35159.1	5	1	100.06	0.601806	1.23442	Medium	High	OTG35159.1 putative thioredoxin-like fold protein [Helianthus annuus]	47636.7	29183.3	52232.4	50061.7	69595.7	39647.2	56246.3	46035.1	43660	43017.5	53101.5	48647.2	0.810099	0.884276	1.09156	-0.303829	-0.177431	0.126398
KVI11201.1	1	1	10.68	0.157309	1.76397	Low	High	KVI11201.1 Protein of unknown function DUF1191 [Cynara cardunculus var. scolymus]	20082.8	21325.1	18811.6	26100.4	27492.4	20697.6	43604.1	42821.4	19800	20073.2	24763.5	35408.5	0.810596	0.566903	0.699366	-0.302945	-0.818826	-0.515881
XP_022004396.1	2	1	19.08	0.81585	1.23362	Medium	High	XP_022004396.1 protein HOTHEAD-like [Helianthus annuus]	4086.91	3014.21	3913.4	3000.76	6685.71	3901.32	5967.13	2984.07	4011.4	3671.51	4529.26	4320.87	0.810619	0.849715	1.04823	-0.302904	-0.234949	0.0679548
KVH93999.1	2	2	28.98	0.691208	1.27511	Low	High	KVH93999.1 Cysteine peptidase, asparagine active site-containing protein [Cynara cardunculus var. scolymus]	27558.9	58570.3	27726	33026.3	68831.2	38440	55930.7	58810.6	30437	37951.7	46765.9	48392.8	0.811526	0.784243	0.966381	-0.301291	-0.350627	-0.0493365
OTG23038.1	1	1	34.43	0.496154	1.35901	Medium	Low	OTG23038.1 putative heme peroxidase [Helianthus annuus]	16584.8	17886.1	13779.8	23599.7	17320.4	18525.6	29725.2	2589.11	11427.8	16083.6	19815.2	14580.7	0.811676	1.10307	1.35901	-0.301024	0.141528	0.442552
OTG18814.1	1	1	7.02	0.94142	1.23198	Medium	High	OTG18814.1 putative UDP-glucuronosyl/UDP-glucosyltransferase [Helianthus annuus]	18973.6	22812.5	20652.1	39706.9	23727.1	13488.5	38300.2	14332	21103	20812.7	25640.8	24578.4	0.811704	0.84679	1.04322	-0.300974	-0.239924	0.0610503
XP_021999605.1	1	1	8.08	0.437124	1.35627	Low	High	XP_021999605.1 uncharacterized protein LOC110896794 [Helianthus annuus]	9350.06	10558	18279.8	18194.7	15151.1	13691.5	11944.8	23096.6	16751.4	12729.3	15679.1	17264.3	0.811864	0.737318	0.90818	-0.300691	-0.439641	-0.13895
KVI00599.1	1	1	19.41	0.532609	1.70956	Low	High	KVI00599.1 Nucleic acid-binding, OB-fold [Cynara cardunculus var. scolymus]	9629.89	6541.32	8748.33	4828.05	19869.1	5994.06	16206.9	19247.4	7147.14	8306.51	10230.4	14200.5	0.811944	0.584946	0.720427	-0.300548	-0.773625	-0.473077
KVH90928.1	2	1	33.33	0.582596	1.37029	Medium	Low	KVH90928.1 Glutathione peroxidase [Cynara cardunculus var. scolymus]	8883.16	6120.86	11549	8348.74	15879.4	8470.38	8760.51	5024.79	10077.2	8851.02	10899.5	7954.17	0.812057	1.11275	1.37029	-0.300347	0.154133	0.45448
XP_022028608.1	2	1	16.77	0.226575	8.77292	Low	High	XP_022028608.1 disease resistance protein RPP4-like [Helianthus annuus]	1021.2	921.253	535.311	962.691	1450.17	636.407	2260.68	18630	846.518	825.922	1016.42	7245.75	0.812577	0.113987	0.140279	-0.299424	-3.13306	-2.83363
KVI05533.1	1	1	8.1	0.286936	1.50404	Low	High	KVI05533.1 Origin recognition complex, subunit 6 [Cynara cardunculus var. scolymus]	15455.4	9915.07	15993.4	14067.9	24412.9	12423.3	20083.8	25670.1	16458.9	13788	16968.1	20737.6	0.812583	0.664877	0.818227	-0.299413	-0.588841	-0.289427
XP_021985020.1	1	1	15.88	0.996515	2.11623	Medium	Low	XP_021985020.1 DNA ligase 1-like [Helianthus annuus]	57826.5	2788.81	3470.66	4707.76	72492.4	1619.12	5159.03	26743.5	5342.64	21362	26273.1	12415	0.813074	1.72065	2.11623	-0.298541	0.782956	1.0815
XP_021992852.1	1	1	6.28	0.0764178	3.06181	Low	High	XP_021992852.1 uncharacterized protein LOC110889598 [Helianthus annuus]	13065.3	12987.2	10820	19036.9	16684.8	9613.53	29875.5	65780.1	17240.8	12290.8	15111.7	37632.1	0.81333	0.326604	0.401564	-0.298087	-1.61438	-1.3163
KVH91970.1	1	1	7.34	0.943393	1.49299	Low	High	KVH91970.1 AP2/ERF domain-containing protein [Cynara cardunculus var. scolymus]	2483.15	3092.5	2785.41	1226.96	2518.33	6529.51	3113.09	7979.18	1390.73	2787.02	3424.93	4161	0.813744	0.669796	0.823103	-0.297353	-0.578207	-0.280854
KVH91287.1	1	1	8.13	0.716136	1.23669	Medium	Low	KVH91287.1 Pentatricopeptide repeat-containing protein [Cynara cardunculus var. scolymus]	4210.2	6936.09	1003.82	5105.62	6078.04	3723.24	3208.14	6599.95	2245.81	4050.04	4968.97	4017.97	0.815066	1.00798	1.23669	-0.295011	0.0114688	0.30648
KVI06181.1	2	1	12.98	0.307796	1.52352	Medium	Low	KVI06181.1 Cullin repeat-like-containing domain-containing protein [Cynara cardunculus var. scolymus]	5706.95	5126.15	5838.24	6915.14	9064.47	4472.32	5204.21	2687.91	5531.98	5557.11	6817.31	4474.7	0.815148	1.2419	1.52352	-0.294866	0.312545	0.607411
XP_022041837.1	1	1	7.93	0.0718047	1.75864	Low	High	XP_022041837.1 putative GEM-like protein 8 [Helianthus annuus]	11128.1	10678.2	6388.85	8381.59	13642.9	12564.3	19162.9	14024.8	16397.5	9398.4	11529.6	16528.4	0.815154	0.568621	0.697562	-0.294856	-0.814462	-0.519606
OTF86823.1	1	1	6.59	0.60634	1.33421	Medium	Low	OTF86823.1 putative protein kinase-like domain-containing protein [Helianthus annuus]	39312.9	15961.7	25446.9	31302.4	42137	25514.4	21587.9	11997.9	40580.8	26907.2	32984.6	24722.2	0.81575	1.08838	1.33421	-0.293802	0.122182	0.415984
XP_021996339.1	1	1	8.4	0.546686	1.34292	Medium	Low	XP_021996339.1 serine/threonine-protein phosphatase 7 long form homolog [Helianthus annuus]	3790.72	2698.2	5137.66	6598.74	4160.39	3492.17	3497.74	2647.21	4467.22	3875.53	4750.44	3537.39	0.815826	1.09559	1.34292	-0.293667	0.131707	0.425374
OTG29173.1	1	1	8.03	0.357201	1.40297	Low	High	OTG29173.1 hypothetical protein HannXRQ_Chr04g0119341 [Helianthus annuus]	3741.58	2068.16	4486.51	3382.19	5165.08	4067.43	4755.66	3763.42	5926.22	3432.08	4204.9	4815.1	0.816211	0.712775	0.873274	-0.292987	-0.488481	-0.195494
KVH94508.1	2	2	20.19	0.00110938	2.25338	Low	High	KVH94508.1 ClpP [Cynara cardunculus var. scolymus]	3318.82	3527.15	3374.17	4448.95	3748.32	4319.43	7141.12	9651.91	6236.84	3406.72	4172.24	7676.62	0.81652	0.443778	0.543499	-0.292439	-1.17209	-0.879651
KVH92355.1	1	1	6.4	0.223612	9.93988	Low	High	KVH92355.1 Nrap protein [Cynara cardunculus var. scolymus]	468.195	475.888	406.775	498.56	582.04	573.756	412.524	1461.06	11553.8	450.286	551.452	4475.79	0.816547	0.100605	0.123208	-0.292393	-3.31323	-3.02084
XP_021971802.1	1	1	7.18	0.455681	1.38292	Medium	Low	XP_021971802.1 uncharacterized protein LOC110866967 [Helianthus annuus]	46538.7	46164.5	54255.8	51464.7	57779.8	70723.5	51881.5	17150.1	61104.4	48986.3	59989.3	43378.7	0.816584	1.12927	1.38292	-0.292327	0.175394	0.46772
KVI09559.1	2	1	19.85	0.575753	1.22323	Medium	High	KVI09559.1 Beta-hexosaminidase subunit alpha/beta [Cynara cardunculus var. scolymus]	22017.2	21851.8	23684.5	18826.6	38607.8	25199.4	23248.5	28019.4	30892.5	22517.8	27544.6	27386.8	0.817505	0.822214	1.00576	-0.2907	-0.282413	0.00828699
OTF94940.1	1	1	6.44	0.450014	1.59238	Medium	Low	OTF94940.1 putative reverse transcriptase, RNA-dependent DNA polymerase [Helianthus annuus]	24138.7	8233.54	21520.9	23298.4	26430.3	16169.6	19144.8	7174.08	15064.7	17964.4	21966.1	13794.5	0.817823	1.30228	1.59238	-0.29014	0.381043	0.671183
KVI06114.1	1	1	9.63	0.086774	1.68015	Low	High	KVI06114.1 C2 calcium-dependent membrane targeting [Cynara cardunculus var. scolymus]	7711.1	8789.24	7181.02	11963.1	10534.6	6457.92	15261.8	14196.7	10329.8	7893.79	9651.85	13262.8	0.817852	0.595184	0.727741	-0.290088	-0.748591	-0.458503
OTF95813.1	1	1	11.02	0.331383	1.80717	Medium	Low	OTF95813.1 putative terpenoid cyclases/protein prenyltransferase alpha-alpha toroid [Helianthus annuus]	1258.02	2184.94	4271.67	3960.54	2948.22	2520.96	798.247	1735.87	2683.82	2571.54	3143.24	1739.31	0.818119	1.47848	1.80717	-0.289618	0.564116	0.853734
KVI11531.1	1	1	15.41	0.438726	1.36506	Medium	Low	KVI11531.1 hypothetical protein Ccrd_010056 [Cynara cardunculus var. scolymus]	15867.3	13045.3	24208.4	21231.9	25494.9	18191.5	14873.5	9574.9	23108.5	17707	21639.4	15852.3	0.818275	1.117	1.36506	-0.289342	0.159625	0.448967
XP_021980559.1	1	1	6.58	0.929573	1.27716	Low	High	XP_021980559.1 uncharacterized protein LOC110876705 [Helianthus annuus]	389461	247594	187322	229193	522964	255248	602651	127124	323085	274792	335802	350953	0.818317	0.782988	0.956828	-0.289268	-0.352938	-0.0636692
KVI12131.1	3	3	45.61	0.35654	1.84815	Low	High	KVI12131.1 hypothetical protein Ccrd_009439 [Cynara cardunculus var. scolymus]	16269.5	15851.2	7892.41	20272.6	17111.3	11510	42032.2	15608.1	16309.8	13337.7	16298	24650	0.818366	0.541083	0.661175	-0.289183	-0.886079	-0.596896
KVI07716.1	5	4	99.69	0.340695	1.74277	Low	High	KVI07716.1 Aldolase-type TIM barrel [Cynara cardunculus var. scolymus]	55924	65043.1	40068.5	83161.3	70922.5	42601.7	82958.8	53404.1	144285	53678.6	65561.9	93549.2	0.818747	0.5738	0.700827	-0.288511	-0.80138	-0.512869
BAC66445.1	3	2	45.35	0.299694	1.60175	Low	High	BAC66445.1 alpha-galactosidase [Helianthus annuus]	14255.8	12680.6	11498.3	15754.2	22085	9069.51	24577	23141.6	13844.2	12811.6	15636.2	20520.9	0.819351	0.624317	0.761965	-0.287446	-0.67965	-0.392203
OTG22478.1	2	1	31.62	0.0488517	2.16677	Low	High	OTG22478.1 putative berberine/berberine-like, FAD-binding, type 2 [Helianthus annuus]	36314.2	35704.8	39356.3	37074.9	54600.3	44189.1	91398	104276	45650.9	37125.1	45288.1	80441.6	0.819754	0.461516	0.562994	-0.286737	-1.11555	-0.82881
XP_021991729.1	1	1	6.08	0.533825	1.67937	Medium	Low	XP_021991729.1 uncharacterized protein LOC110888513 [Helianthus annuus]	8918.05	15568	26689.3	41469.9	4091.41	16840.3	9297.95	175.565	27684.4	17058.5	20800.6	12386	0.820096	1.37724	1.67937	-0.286135	0.461782	0.747916
OTG38060.1	6	2	106.94	0.687259	1.21746	Medium	High	OTG38060.1 putative thioredoxin-like fold protein [Helianthus annuus]	11796.6	8296	12128.8	11336.2	17942.1	9950	14314.8	10086.2	9722.52	10740.5	13076.1	11374.5	0.821383	0.944259	1.1496	-0.283874	-0.0827453	0.201128
KVH93467.1	2	1	27.49	0.924762	1.21991	Medium	High	KVH93467.1 heme peroxidase [Cynara cardunculus var. scolymus]	16264.4	18164.5	13501.7	19789.2	11400.7	27142.6	33728.5	14238.5	10504.1	15976.9	19444.1	19490.4	0.82168	0.819731	0.997628	-0.283352	-0.286778	-0.00342593
OTF96690.1	1	1	7.03	0.777005	1.21696	Medium	High	OTF96690.1 hypothetical protein HannXRQ_Chr15g0496931 [Helianthus annuus]	49871.6	25007.6	64172.1	41931.6	82336.9	44951	67138.6	35104.5	60953.9	46350.4	56406.5	54399	0.821722	0.852046	1.0369	-0.283278	-0.230997	0.0522812
AIY60738.1	1	1	8.16	0.0408158	1.217	Low	High	AIY60738.1 rhomboid protein Lacsa33473 [Lactuca sativa]	17067	17446.4	16700.1	19376.3	23958.4	18988.3	20715.1	21856.5	19755.3	17071.2	20774.3	20775.6	0.821745	0.821692	0.999936	-0.283238	-0.283331	-9.27176e-05
KVI03444.1	11	11	143.4	0.336759	1.41937	Low	High	KVI03444.1 Nascent polypeptide-associated complex NAC domain-containing protein [Cynara cardunculus var. scolymus]	68307.4	86277.5	74792.3	87888	121236	69900.4	74656.8	132054	118861	76459.1	93008.2	108524	0.822068	0.704536	0.857028	-0.28267	-0.505255	-0.222585
ARU07851.1	1	1	9.82	0.575911	1.49106	Low	High	ARU07851.1 ribosomal protein L2 (chloroplast) [Artemisia gmelinii]	53098.5	15183	27975.3	34076.4	49908.2	33099.1	27286.7	77496.9	38741.4	32085.6	39027.9	47841.7	0.822119	0.670662	0.815772	-0.28258	-0.576342	-0.293762
KVH87896.1	1	1	7.65	0.338489	11.9423	Low	High	KVH87896.1 hypothetical protein Ccrd_024790, partial [Cynara cardunculus var. scolymus]	573.578	545.39	168.393	523.886	265.812	774.47	719.244	432.401	14222.4	429.12	521.39	5124.68	0.823032	0.083736	0.101741	-0.280979	-3.57801	-3.29703
OTG14078.1	1	1	7.54	0.471515	1.27778	Low	High	OTG14078.1 hypothetical protein HannXRQ_Chr09g0245381 [Helianthus annuus]	14777.6	14142.3	13167.1	14704.9	18864.7	17545.3	13770.5	25536.3	14470.9	14029	17038.3	17925.9	0.823378	0.782609	0.950485	-0.280372	-0.353636	-0.0732639
OTG29686.1	1	1	8.95	0.100449	3.02541	Low	High	OTG29686.1 putative mitochodrial transcription termination factor [Helianthus annuus]	4928.55	7795.57	4332.43	6720.17	9002.47	4982.49	16406.6	28397.3	6799.2	5685.52	6901.71	17201	0.823784	0.330533	0.401238	-0.279663	-1.59713	-1.31747
OTG01475.1	1	1	7.79	0.929909	1.28563	Low	High	OTG01475.1 Protein of unknown function, DUF642 [Helianthus annuus]	3732.27	6928.03	4102.61	5004.61	9592.06	3317.91	5498.28	10642.4	2838.99	4920.97	5971.53	6326.55	0.824073	0.777829	0.943884	-0.279157	-0.362475	-0.0833186
KVH92173.1	2	1	16.59	0.230538	1.9647	Medium	Low	KVH92173.1 hypothetical protein Ccrd_005794 [Cynara cardunculus var. scolymus]	10537.3	5392.17	16263.7	16195.9	11845.2	11012.2	12347.2	4538.67	2991.64	10731.1	13017.8	6625.83	0.82434	1.61958	1.9647	-0.278688	0.69562	0.974308
OTG28829.1	8	3	99.16	0.0953407	1.84267	Low	High	OTG28829.1 putative MALE GAMETOPHYTE DEFECTIVE 1 [Helianthus annuus]	18442.9	15229.3	15060.1	15565.5	30531.1	12984	36956	27296.9	25545	16244.1	19693.5	29932.6	0.824844	0.54269	0.65793	-0.277806	-0.881801	-0.603995
KVI06091.1	1	1	7.95	0.238117	9.78657	Low	High	KVI06091.1 Protein kinase, ATP binding site-containing protein [Cynara cardunculus var. scolymus]	780.203	2412.83	988.496	1712.31	1384.18	1969.62	1423.91	3486.27	36012.7	1393.84	1688.7	13640.9	0.825393	0.102181	0.123797	-0.276847	-3.2908	-3.01396
KVH91866.1	7	3	80.96	0.825398	1.21113	Medium	High	KVH91866.1 Glutathione peroxidase [Cynara cardunculus var. scolymus]	21112.8	20192.1	24205.2	22342.1	40557.8	16441.3	35277.7	19410.4	24184	21836.7	26447.1	26290.7	0.825675	0.830586	1.00595	-0.276354	-0.267799	0.0085552
OTG07933.1	1	1	7.47	0.663261	1.21572	Low	High	OTG07933.1 putative NAC domain-containing protein [Helianthus annuus]	17910.7	15135.4	18919.9	19804.8	25797.5	17312.6	21832.4	13351.8	27991.8	17322	20971.6	21058.7	0.825973	0.822559	0.995866	-0.275834	-0.28181	-0.00597578
KVI08565.1	7	2	70.01	0.0604456	2.24576	Low	High	KVI08565.1 60S ribosomal protein L4, C-terminal domain-containing protein [Cynara cardunculus var. scolymus]	10774.3	16088.8	12933.6	23176.3	15979	9014.68	40122.5	26099.7	23151.4	13265.6	16056.6	29791.2	0.826172	0.445285	0.538973	-0.275485	-1.1672	-0.891715
KVH91564.1	5	1	60.17	0.040413	3.22135	Low	High	KVH91564.1 Ribosomal protein L13e, partial [Cynara cardunculus var. scolymus]	5641.55	8994.89	6718.47	10826.5	11407	3596.6	22762.8	31480	14548.8	7118.3	8610.01	22930.6	0.826747	0.310429	0.375482	-0.274482	-1.68767	-1.41318
KVH89357.1	1	1	6	0.491762	1.44592	Low	High	KVH89357.1 Glycogen/starch synthase, ADP-glucose type [Cynara cardunculus var. scolymus]	31509.6	24826.6	29598.9	47491.9	39534.6	16857.6	46204.2	30980.5	47070.5	28645	34628	41418.4	0.827221	0.691601	0.836054	-0.273655	-0.531988	-0.258333
KVH89811.1	1	1	8.88	0.86659	1.2832	Medium	Low	KVH89811.1 hypothetical protein Ccrd_008220, partial [Cynara cardunculus var. scolymus]	38583.4	49858.7	25745.2	65441.6	50466.5	21976.9	43594.4	38612.4	25247.2	38062.4	45961.7	35818	0.828134	1.06266	1.2832	-0.272064	0.0876824	0.359747
KVI07264.1	3	3	39.49	0.261026	1.37925	Low	High	KVI07264.1 Peptidyl-prolyl cis-trans isomerase, FKBP-type [Cynara cardunculus var. scolymus]	10179.6	10972.9	11628	12850.4	15505.1	11225.7	15181	10740.1	19291.4	10926.8	13193.7	15070.8	0.828185	0.725032	0.875447	-0.271976	-0.463884	-0.191909
KVH95304.1	1	1	10.19	0.514609	1.67779	Low	High	KVH95304.1 hypothetical protein Ccrd_002602 [Cynara cardunculus var. scolymus]	2468.97	2926.28	4499.1	4318.97	3183.7	4438.1	4662.23	2629.85	9308.56	3298.12	3980.25	5533.55	0.82862	0.596023	0.719296	-0.271218	-0.746561	-0.475343
OTF92118.1	1	1	9.86	0.86045	10.6307	Low	High	OTF92118.1 putative ribosomal protein S18 [Helianthus annuus]	54.0713	37.3408	932.122	193.814	283.731	756.54	22.5956	15.1591	10843.1	341.178	411.362	3626.96	0.829387	0.0940673	0.113418	-0.269883	-3.41016	-3.14028
CBG02699.1	3	1	40.52	0.390585	3.05748	Low	High	CBG02699.1 unnamed protein product [Helianthus annuus]	2055.27	2899.59	2579.95	2322.43	2568.76	4192.25	4875.9	16278.7	1883	2511.61	3027.81	7679.19	0.829512	0.327067	0.394288	-0.269666	-1.61234	-1.34268
KVI08070.1	1	1	7.36	0.167737	2.1746	Medium	Low	KVI08070.1 Protein of unknown function DUF4228 [Cynara cardunculus var. scolymus]	36453.4	18961.1	29617.3	44194.8	42554.7	15692.8	18808.8	12200.5	16099.3	28344	34147.5	15702.9	0.830046	1.80502	2.1746	-0.268736	0.852013	1.12075
KVH88405.1	1	1	9.52	0.534861	1.70674	Medium	Low	KVH88405.1 Pentatricopeptide repeat-containing protein [Cynara cardunculus var. scolymus]	211379	330624	737889	332626	918433	290864	234758	59886.4	608788	426631	513974	301144	0.830062	1.4167	1.70674	-0.268709	0.502534	0.771243
KVH92524.1	3	2	20.59	0.0660241	1.41071	Medium	Low	KVH92524.1 protein of unknown function DUF547 [Cynara cardunculus var. scolymus]	6957.72	5641.36	7058.78	8197.4	9233.86	6248.38	5634.88	5538.42	5612.3	6552.62	7893.21	5595.2	0.830158	1.17111	1.41071	-0.268541	0.227881	0.496422
OTG13445.1	3	3	62.07	0.124922	1.97731	Low	High	OTG13445.1 putative O-methyltransferase, family 3, S-adenosyl-L-methionine-dependent methyltransferase [Helianthus annuus]	51964.2	75433.6	71750.7	71936.8	109866	58084.5	128437	185856	79485.1	66382.8	79962.6	131260	0.830174	0.505737	0.609194	-0.268515	-0.983541	-0.715026
KVI09326.1	1	1	6.95	0.890125	1.31149	Low	High	KVI09326.1 Homeobox KN domain-containing protein [Cynara cardunculus var. scolymus]	25465.8	19356.7	27383.3	25877.8	38464.8	22633	56487.8	14470.5	23739.1	24068.6	28991.8	31565.8	0.830186	0.76249	0.918457	-0.268494	-0.39121	-0.122716
OTG19019.1	7	3	80.72	0.915544	1.58311	Low	High	OTG19019.1 putative cyclophilin-type peptidyl-prolyl cis-trans isomerase domain-containing protein [Helianthus annuus]	30800.4	24104.6	27826.9	26729.1	52842.7	20064.5	61928.6	57926.2	11119	27577.3	33212.1	43657.9	0.830339	0.631667	0.760734	-0.268228	-0.662763	-0.394535
OTF90370.1	10	1	162.95	0.460405	1.60628	Medium	Low	OTF90370.1 putative glycoside hydrolase family 38, N-terminal domain-containing protein [Helianthus annuus]	6346.48	6888.66	5690.68	4170.91	11281.9	7322.83	5355.35	1045.65	7778.18	6308.61	7591.89	4726.39	0.830967	1.33476	1.60628	-0.267138	0.416583	0.68372
KVH90890.1	1	1	8.45	0.0651562	2.83529	Low	High	KVH90890.1 Cation efflux protein [Cynara cardunculus var. scolymus]	4920.11	6159.28	3218.7	5002.22	7922.14	4281.53	13597	20388	6554.25	4766.03	5735.3	13513.1	0.831	0.352698	0.424426	-0.26708	-1.50349	-1.23642
KVH91529.1	2	2	14.22	0.552212	1.21529	Medium	Low	KVH91529.1 ATPase, nucleosome remodelling ISWI, HAND domain-containing protein [Cynara cardunculus var. scolymus]	240264	192045	181397	212085	335902	190433	225205	185446	196959	204569	246140	202537	0.831108	1.01003	1.21529	-0.266893	0.0144025	0.281295
ARH09234.1	4	1	41.89	0.345857	1.42526	Low	High	ARH09234.1 ATP synthase CF1 alpha subunit (chloroplast) [Diplostephium heterophyllum]	1579.44	1920.32	992.171	2305.79	1335.12	1762.06	1836.8	2743.28	1822.09	1497.31	1800.99	2134.05	0.83138	0.701626	0.843929	-0.26642	-0.511226	-0.244806
KVH96047.1	1	1	6.12	0.805836	1.20301	Low	High	KVH96047.1 Barwin-like endoglucanase [Cynara cardunculus var. scolymus]	2056.22	1361.49	3389.95	2998.07	1819.28	3360.3	3081.75	3651.15	1456.79	2269.22	2725.88	2729.9	0.832471	0.831248	0.99853	-0.264528	-0.26665	-0.00212181
KVH91014.1	3	3	31.59	0.0489674	2.34137	Low	High	KVH91014.1 Ribosomal protein L14b/L23e [Cynara cardunculus var. scolymus]	14893.3	24059	14639.4	29006	22332.4	13026.1	44634.7	52588	28255.3	17863.9	21454.8	41826	0.832627	0.4271	0.512955	-0.264257	-1.22735	-0.963096
OTG24335.1	3	1	38.24	0.420964	1.29933	Low	High	OTG24335.1 putative neutral/alkaline non-lysosomal ceramidase [Helianthus annuus]	8970.17	7359.71	11044.5	10867.7	13011.9	8993.11	15712	9262.43	10593.8	9124.8	10957.6	11856.1	0.832738	0.76963	0.924216	-0.264065	-0.377763	-0.113698
OTG20047.1	1	1	6.96	0.818144	1.66388	Medium	Low	OTG20047.1 putative myeloid leukemia factor [Helianthus annuus]	8965.29	270.146	3228.88	1271.03	4928.06	8766.99	3631.72	492.197	4870.79	4154.77	4988.69	2998.24	0.832838	1.38574	1.66388	-0.263892	0.470655	0.734548
KVI09824.1	5	1	55.89	0.273735	2.75906	Low	High	KVI09824.1 NAD-dependent epimerase/dehydratase [Cynara cardunculus var. scolymus]	4117.09	6659.23	6487.19	11228.3	4066.61	5432.2	6677.71	31856.7	9096.61	5754.5	6909.03	15877	0.832896	0.362442	0.435159	-0.263791	-1.46418	-1.20039
KVH92463.1	1	1	7.16	0.555314	1.40227	Medium	Low	KVH92463.1 Aspartic peptidase [Cynara cardunculus var. scolymus]	16282.9	8532.57	20072.9	12644.6	23365.4	17847.6	8960.55	8120.25	21326.7	14962.8	17952.5	12802.5	0.833464	1.16874	1.40227	-0.262808	0.224954	0.487762
OTG17103.1	3	1	32.57	0.389932	1.1995	Medium	High	OTG17103.1 putative melibiase family protein [Helianthus annuus]	5295.65	4379.79	7288	6292.39	6900.1	7155.13	5314.84	6579.39	6378.53	5654.48	6782.54	6090.92	0.833682	0.928346	1.11355	-0.262431	-0.107266	0.155165
XP_022018643.1	1	1	6.6	0.655385	1.62692	Low	High	XP_022018643.1 uncharacterized protein LOC110918676 [Helianthus annuus]	43250.5	21257.8	29724.5	42695.5	46766.6	23470.3	69730.8	19846	63732.3	31410.9	37644.1	51103	0.834418	0.614659	0.736632	-0.261158	-0.702142	-0.440985
KVH98383.1	1	1	8.53	0.245226	1.83472	Low	High	KVH98383.1 GYF-like protein [Cynara cardunculus var. scolymus]	26107.1	16976.9	16614.3	19241.3	36487.6	15787.1	53310	33645.3	22574.5	19899.4	23838.7	36509.9	0.834755	0.545042	0.652936	-0.260575	-0.875561	-0.614986
KVI08350.1	1	1	10.7	0.00096091	4.84998	Low	High	KVI08350.1 hypothetical protein Ccrd_013276 [Cynara cardunculus var. scolymus]	4244.47	2775.44	2337.05	3822.87	3711.24	3655.64	11085.7	22137.1	12158.3	3118.99	3729.92	15127	0.836208	0.206186	0.246573	-0.258066	-2.27798	-2.01991
KVI09911.1	1	1	10.61	0.733816	1.22436	Low	High	KVI09911.1 JAB1/Mov34/MPN/PAD-1 [Cynara cardunculus var. scolymus]	16275.4	6612.42	14623.5	14496.1	21592	8736.7	17192.2	16955.6	11779.5	12503.8	14941.6	15309.1	0.836843	0.816755	0.975996	-0.256972	-0.292025	-0.0350532
OTF99267.1	1	1	11.94	0.312453	137.655	Low	High	OTF99267.1 putative PWWP domain-containing protein [Helianthus annuus]	4849.95	3130.78	4925.33	4620.45	6108.77	4692	6431.28	6873.68	1.76328e+06	4302.02	5140.41	592194	0.836903	0.00726455	0.00868027	-0.256868	-7.10491	-6.84804
OTG07012.1	6	1	157.87	0.724102	1.37147	Low	High	OTG07012.1 putative peroxidase superfamily protein [Helianthus annuus]	70944.2	118523	141101	97532.9	190750	106404	201441	173793	78132.4	110189	131562	151122	0.837546	0.729143	0.870571	-0.25576	-0.455727	-0.199966
KVI07374.1	1	1	9.86	0.929281	8.92299	Low	High	KVI07374.1 Leucine-rich repeat-containing protein [Cynara cardunculus var. scolymus]	170.936	166.427	171.446	146.721	82.883	377.888	240.742	2270.04	4299.35	169.603	202.497	2270.04	0.837555	0.0747134	0.0892041	-0.255744	-3.74249	-3.48675
KVH88621.1	5	4	54.17	0.110064	2.18719	Low	High	KVH88621.1 Ribosomal protein S3Ae [Cynara cardunculus var. scolymus]	7986.86	10778	6701.33	13449.1	12190.5	4761.47	24350.5	18296.6	13052.1	8488.71	10133.7	18566.4	0.837672	0.457208	0.545808	-0.255543	-1.12908	-0.873533
OTG12959.1	1	1	8.55	0.857907	1.21356	Medium	Low	OTG12959.1 putative protein of unknown function DUF4602 [Helianthus annuus]	11255.2	6950.07	15734.2	10952.9	20962	8591.39	12036.9	11416.4	9924.86	11313.1	13502.1	11126	0.837881	1.01682	1.21356	-0.255183	0.0240614	0.279244
KVF72034.1	1	1	8.71	0.297795	4.91431	Low	High	KVF72034.1 UDP-glucuronosyl/UDP-glucosyltransferase [Cynara cardunculus var. scolymus]	3122.22	2694.82	3159.66	2659.34	4209.78	3839.58	2953.48	5209.36	35951.5	2992.24	3569.57	14704.8	0.838263	0.203487	0.242749	-0.254525	-2.29699	-2.04246
OTG03482.1	4	4	64.97	0.22904	1.53611	Low	High	OTG03482.1 putative ribosomal protein S19 [Helianthus annuus]	58422.4	33635.3	79445.4	71040.1	80634.6	52822.1	71973	87557.3	103918	57167.7	68165.6	87816.1	0.838659	0.650994	0.776232	-0.253844	-0.619284	-0.365441
KVI03522.1	1	1	9.9	0.0798786	1.66143	Low	High	KVI03522.1 Glycoside hydrolase, family 28 [Cynara cardunculus var. scolymus]	2418.55	3074.17	2073.76	2329.07	4190.29	2499.69	4264.8	4682.81	3623.57	2522.16	3006.35	4190.39	0.838943	0.601891	0.717439	-0.253355	-0.732426	-0.479071
KVI10313.1	1	1	7.93	0.9472	1.32088	Low	High	KVI10313.1 SWAP/Surp [Cynara cardunculus var. scolymus]	4349.98	1484.87	1262.63	251.207	1882.12	6326	343.369	4231.81	4799.78	2365.83	2819.78	3124.99	0.839013	0.757068	0.902333	-0.253236	-0.401505	-0.148269
OTG08890.1	2	2	25.37	0.313087	1.54425	Low	High	OTG08890.1 putative UDP-D-apiose/UDP-D-xylose synthase 1 [Helianthus annuus]	12031.6	32829.7	13430.7	15121.8	28409.5	25936.9	34490.1	31090.5	24436.8	19430.7	23156.1	30005.8	0.839119	0.647564	0.771719	-0.253053	-0.626905	-0.373852
OTG10018.1	2	1	27.4	0.905375	1.19164	Medium	High	OTG10018.1 putative glutathione peroxidase 4 [Helianthus annuus]	25622.9	21446.8	29464.6	25332.6	46513.1	19355.8	37346.3	19694.3	29208.2	25511.4	30400.5	28749.6	0.839177	0.887365	1.05742	-0.252953	-0.1724	0.0805529
OTG08654.1	7	3	180.78	0.513419	1.21456	Medium	Low	OTG08654.1 putative nucleoside diphosphate kinase A [Helianthus annuus]	156091	134284	112911	127447	190982	162030	173538	98906.1	123137	134429	160153	131860	0.839378	1.01948	1.21456	-0.252607	0.0278304	0.280438
OTG00472.1	1	1	8.7	0.485812	1.33006	Medium	Low	OTG00472.1 putative glycosyl transferase, family 8, nucleotide-diphospho-sugar transferase [Helianthus annuus]	100186	77533.2	56410.2	73419.6	118483	86926.7	76131.8	46453.1	87052.1	78043.3	92943.2	69879	0.839688	1.11683	1.33006	-0.252075	0.159416	0.41149
OTG08027.1	1	1	10.39	0.530735	1.29439	Low	High	OTG08027.1 putative transferase, Chloramphenicol acetyltransferase-like domain protein [Helianthus annuus]	4115.04	4497.18	4255.72	4459.99	7227.9	3635.65	5734.53	6728.4	4193.2	4289.31	5107.85	5552.04	0.839749	0.772565	0.919995	-0.251969	-0.372272	-0.120302
OTG30604.1	1	1	6.52	0.910352	1.27062	Low	High	OTG30604.1 hypothetical protein HannXRQ_Chr03g0066351 [Helianthus annuus]	72931.9	80723.5	66923.1	24990.3	125725	111874	114523	118123	47625.8	73526.2	87529.8	93423.8	0.840013	0.787018	0.936911	-0.251516	-0.345531	-0.0940155
OTG09546.1	1	1	10.57	0.645945	1.5038	Medium	Low	OTG09546.1 putative glutamyl-tRNA reductase 1 protein [Helianthus annuus]	24089.2	16646.1	49721.8	30080.1	55727.7	21839.2	32588.7	14590.3	24404.6	30152.4	35882.3	23861.2	0.840312	1.26366	1.5038	-0.251003	0.337606	0.588608
XP_022035589.1	2	1	17.41	0.0514061	2.30229	Low	High	XP_022035589.1 LRR receptor-like serine/threonine-protein kinase RPK2 [Helianthus annuus]	2503.26	2636.65	2576.8	3954.1	2873.88	2354.92	4197.6	4187.83	9380.69	2572.24	3060.96	5922.04	0.840336	0.43435	0.516877	-0.250962	-1.20307	-0.952108
KVH95668.1	3	1	38.91	0.455717	1.37709	Low	High	KVH95668.1 hypothetical protein Ccrd_002241 [Cynara cardunculus var. scolymus]	5054.94	12763.6	12156	10002.7	16049.8	9616.2	13399.2	16351.3	11527.1	9991.51	11889.6	13759.2	0.84036	0.726169	0.864117	-0.250921	-0.461622	-0.210701
OTG03846.1	1	1	8.22	0.318709	1.9292	Low	High	OTG03846.1 putative purple acid phosphatase 29 [Helianthus annuus]	20205.5	17398.6	16636.4	32402.3	17120.9	15010.8	37224.9	15962.2	51453.7	18080.1	21511.4	34880.3	0.840493	0.518349	0.616719	-0.250692	-0.948005	-0.697314
OTF91916.1	1	1	6.11	0.740675	1.89388	Medium	Low	OTF91916.1 putative multi antimicrobial extrusion protein [Helianthus annuus]	198.54	2502.87	155096	151033	6.21068	36645.2	17335.9	53515.6	28248.5	52599.3	62561.3	33033.3	0.840763	1.59231	1.89388	-0.250228	0.67112	0.921349
KVI02288.1	1	1	9.29	0.328977	1.86493	Low	High	KVI02288.1 sorting-associate protein Vta1/Callose synthase [Cynara cardunculus var. scolymus]	2265.54	2221.13	2525.67	2754.33	3569.91	2015.15	6136.34	1931.21	5009.98	2337.45	2779.8	4359.18	0.84087	0.536213	0.637689	-0.250046	-0.899122	-0.649076
KVI05926.1	1	1	10.07	0.178271	2.33697	Low	High	KVI05926.1 Armadillo-like helical [Cynara cardunculus var. scolymus]	3886.91	2672.43	2689.89	3658.99	3997.32	3340.29	6017.45	12444.2	3153.59	3083.08	3665.53	7205.07	0.841099	0.427904	0.508744	-0.249652	-1.22464	-0.974988
ACB29253.1	1	1	6.56	0.120265	2.63521	Low	High	ACB29253.1 maturase K (chloroplast) [Felicia heterophylla]	13846.8	13786.9	9972.24	11188.5	18051.2	15463.3	25416.5	58474.2	15208.9	12535.3	14901	33033.2	0.841237	0.379476	0.451093	-0.249416	-1.39792	-1.1485
OTF91066.1	1	1	7.34	0.0253683	2.28146	Low	High	OTF91066.1 putative major facilitator superfamily protein [Helianthus annuus]	9477.47	9279.49	4338.65	10481.4	9353.69	7613.05	21365.9	15921.8	15403.9	7698.54	9149.39	17563.9	0.841426	0.438316	0.520921	-0.249092	-1.18996	-0.940863
KVH90107.1	1	1	6.68	0.783934	1.18842	Medium	High	KVH90107.1 Remorin, C-terminal [Cynara cardunculus var. scolymus]	24050.6	16115.2	27875.2	19067.8	37998.2	23794.9	31095.8	27647.5	19313.7	22680.3	26953.6	26019	0.841457	0.871682	1.03592	-0.249039	-0.198125	0.0509139
KVI05567.1	1	1	9.66	0.254707	6.9517	Low	High	KVI05567.1 hypothetical protein Ccrd_016073 [Cynara cardunculus var. scolymus]	1033.66	931.608	717.495	917.075	1521.71	746.498	1914.49	15822	913.267	894.255	1061.76	6216.6	0.842239	0.14385	0.170794	-0.247699	-2.79737	-2.54967
OTG27144.1	2	2	43.44	0.00446011	6.10896	Low	High	OTG27144.1 putative phospholipase D alpha 1 [Helianthus annuus]	5169.94	5624.92	2999.62	10172	3156.91	3049.08	30284.2	32997	20988.8	4598.16	5459.32	28090	0.842259	0.163694	0.194351	-0.247663	-2.61093	-2.36326
OTF86408.1	1	1	6.25	0.786258	1.49973	Low	High	OTF86408.1 hypothetical protein HannXRQ_Chr17g0550471 [Helianthus annuus]	6026.5	5050.44	5364.7	6742.31	6947.29	5830.45	7757.2	3178.96	13721.9	5480.55	6506.68	8219.34	0.842295	0.666786	0.791631	-0.247603	-0.584703	-0.337101
KVH93691.1	1	1	7.23	0.634154	1.18667	Medium	High	KVH93691.1 DNA-directed RNA polymerase, helix hairpin domain-containing protein [Cynara cardunculus var. scolymus]	24021.6	24846.1	28261.3	21551.9	35490.8	34484	32644.7	25159.2	19641.4	25709.6	30508.9	25815.1	0.842693	0.995914	1.18182	-0.246921	-0.00590748	0.241014
XP_021996712.1	1	1	7.16	0.412343	2.47141	Medium	High	XP_021996712.1 protein FAR1-RELATED SEQUENCE 5-like [Helianthus annuus]	46291.9	70770.1	39936	71602.6	45626.9	68991.2	185941	169410	32655.2	52332.7	62073.6	129335	0.843075	0.404627	0.479942	-0.246268	-1.30533	-1.05907
KVH92109.1	1	1	8.07	0.558653	1.35491	Medium	Low	KVH92109.1 Leucine rich repeat 4 [Cynara cardunculus var. scolymus]	21489.4	18681.7	33488.7	21570.5	39078.8	26701.2	31074.8	11685.4	21709.3	24553.3	29116.9	21489.9	0.843267	1.14255	1.35491	-0.245939	0.19226	0.438199
KVI12446.1	1	1	8.09	0.507322	1.87316	Medium	Low	KVI12446.1 Double-stranded RNA-binding-like domain-containing protein [Cynara cardunculus var. scolymus]	22991.2	176.79	2270.41	16385	7003.63	6772.82	913.852	404.965	14783.1	8479.47	10053.8	5367.3	0.843407	1.57984	1.87316	-0.245698	0.659776	0.905475
OTG37003.1	1	1	7.09	0.669202	1.18558	Medium	High	OTG37003.1 putative ARID DNA-binding domain-containing protein [Helianthus annuus]	3449.4	3087.19	3653.5	5097.24	3671.47	3312.45	3887	2636.22	4431.86	3396.69	4027.05	3651.69	0.843469	0.93017	1.10279	-0.245593	-0.104433	0.141159
OTF98345.1	2	1	31.48	0.473164	1.49002	Medium	Low	OTF98345.1 putative glutamine synthetase [Helianthus annuus]	32788.5	16648.3	18495.7	29751.7	25299.3	25464.6	21416.1	3113.52	29507	22644.2	26838.5	18012.2	0.843718	1.25716	1.49002	-0.245168	0.330165	0.575333
OTG27170.1	2	1	14.97	0.0647768	3.23119	Low	High	OTG27170.1 putative ADP-glucose pyrophosphorylase, conserved site, nucleotide-diphospho-sugar transferase [Helianthus annuus]	4282.97	1887.27	1261.12	4174.08	2312.38	2318	5079.57	5440.8	13491.8	2477.12	2934.82	8004.05	0.844045	0.309483	0.366667	-0.244608	-1.69207	-1.44746
OTF90906.1	2	2	15.52	0.0350973	1.8022	Low	High	OTF90906.1 putative ribosomal protein L19, Translation protein SH3-like domain protein [Helianthus annuus]	12879.3	10539.5	8761.13	11788.6	13823	12472.1	23886.8	13674	20433.8	10726.6	12694.6	19331.5	0.844978	0.554878	0.656677	-0.243014	-0.849758	-0.606744
KVH93294.1	6	6	75.75	0.00920205	2.57968	Low	High	KVH93294.1 Ribosomal protein S5 domain 2-type fold [Cynara cardunculus var. scolymus]	16576.7	17780.9	15225.9	25227.9	21774.3	11671.3	47045.5	46808.8	34055.3	16527.9	19557.8	42636.5	0.845077	0.387646	0.45871	-0.242845	-1.36719	-1.12434
OTF87639.1	4	2	52.07	0.574886	1.40882	Medium	Low	OTF87639.1 putative epidermis-specific secreted glycoprotein EP1 [Helianthus annuus]	10190.6	27379.4	31194.2	20866.7	28234	32229.7	17954.8	15351.4	24423.4	22921.4	27110.1	19243.2	0.845493	1.19114	1.40882	-0.242135	0.252348	0.494483
KVI03901.1	1	1	11.46	0.281185	1.8061	Low	High	KVI03901.1 Signal recognition particle, SRP9/SRP14 subunit [Cynara cardunculus var. scolymus]	7737.78	7801.61	7914.04	8904.79	13591	5239.39	12788.1	21129.7	8441.48	7817.81	9245.05	14119.8	0.845622	0.553678	0.654758	-0.241916	-0.852881	-0.610965
OTG16432.1	1	1	10.78	0.93335	1.22088	Low	High	OTG16432.1 putative zinc ion binding,zinc ion binding protein [Helianthus annuus]	425972	234336	232885	214673	540016	301450	341442	80768.3	668272	297731	352046	363494	0.845715	0.819079	0.968505	-0.241757	-0.287925	-0.0461679
XP_022040211.1	1	1	6.41	0.70514	1.30355	Low	High	XP_022040211.1 uncharacterized protein LOC110942755 [Helianthus annuus]	6398.05	8446.36	7321.46	10979.9	8405.18	6807.39	10655.5	12833.2	5405.66	7388.62	8730.81	9631.45	0.84627	0.767135	0.906489	-0.24081	-0.382448	-0.141638
APX43167.1	13	2	238.11	0.502243	1.25946	Medium	Low	APX43167.1 glyceraldehyde 3-phosphate dehydrogenase, partial [Gazania rigens]	32542.5	29286.4	38915.5	37575.6	39288.1	42172.4	35007.2	16692.4	42814	33581.5	39678.7	31504.5	0.846335	1.06592	1.25946	-0.240699	0.0921054	0.332805
XP_022004225.1	1	1	11.98	0.266607	13.5568	Low	High	XP_022004225.1 uncharacterized protein LOC110901743 [Helianthus annuus]	5408.55	8839.53	3033.42	3277.61	13012.1	4119.36	8873.01	8437.77	216970	5760.5	6803.04	78093.7	0.846754	0.0737639	0.0871137	-0.239985	-3.76094	-3.52096
XP_021995529.1	1	1	9.17	0.121135	1.68869	Low	High	XP_021995529.1 3-hydroxy-3-methylglutaryl-coenzyme A reductase 2-like [Helianthus annuus]	9644.71	12704.1	9472.55	11917.4	10360.1	15270.4	20774.7	21432.2	11529.5	10607.1	12516	17912.1	0.847489	0.592176	0.698742	-0.238734	-0.755901	-0.517168
OTG01763.1	1	1	11.48	0.733669	1.25774	Medium	Low	OTG01763.1 hypothetical protein HannXRQ_Chr13g0405541 [Helianthus annuus]	134695	28502.4	112159	112223	122041	90603.1	73470.6	41446.3	143378	91785.6	108289	86098.3	0.847598	1.06606	1.25774	-0.238548	0.0922824	0.330831
OTG12345.1	1	1	6.45	0.478545	1.28466	Low	High	OTG12345.1 putative clpP/crotonase-like domain, Enoyl-CoA hydratase/isomerase, HIBYL-CoA-H type [Helianthus annuus]	17485.4	10024.7	14432.2	16648.2	20452.2	12381.6	17334.6	22103.2	14443.8	13980.8	16494	17960.6	0.847628	0.778414	0.918345	-0.238497	-0.36139	-0.122892
KVI12458.1	4	1	53.02	0.264247	1.45457	Low	High	KVI12458.1 Ribosomal protein L22e [Cynara cardunculus var. scolymus]	15808.1	15379.5	15457.8	23874.1	20488.9	10654.5	25076.8	22529.9	20242.6	15548.5	18339.2	22616.4	0.847829	0.687488	0.810879	-0.238154	-0.540595	-0.302441
KVH94521.1	4	1	54.43	0.264247	1.45457	Low	High	KVH94521.1 Ribosomal protein L22e [Cynara cardunculus var. scolymus]	12978.1	12626.2	12690.5	19600.1	16820.9	8747.12	20587.5	18496.5	16618.7	12765	15056	18567.5	0.847829	0.687488	0.810879	-0.238154	-0.540595	-0.302441
KVH90644.1	13	2	193.59	0.0145217	2.21819	Low	High	KVH90644.1 Ribosomal protein S5/S7 [Cynara cardunculus var. scolymus]	31449.4	34080.3	25374.8	49552.3	30895.1	26736	84304.7	60356.2	56982.4	30301.5	35727.8	67214.4	0.848121	0.450819	0.53155	-0.237657	-1.14938	-0.911724
KVI05647.1	1	1	8.91	0.761147	1.30861	Low	High	KVI05647.1 AAA+ ATPase domain-containing protein [Cynara cardunculus var. scolymus]	50631.4	17144.5	48801.8	49905.1	53149.7	34334.6	33685.2	85748.4	33121.3	38859.2	45796.4	50851.6	0.848521	0.764169	0.90059	-0.236979	-0.388036	-0.151058
OTG13312.1	1	1	7.03	0.203128	1.5738	Low	High	OTG13312.1 putative metallopeptidase M24 family protein [Helianthus annuus]	5280.19	4515.12	4308.78	6548.49	4324.47	5746.26	10479.4	5155.94	6561.71	4701.37	5539.74	7399.01	0.848662	0.635405	0.748714	-0.236738	-0.654252	-0.417514
OTG30017.1	3	2	23.92	0.88528	1.52776	Low	High	OTG30017.1 putative zinc finger, CCHC-type [Helianthus annuus]	8294.3	4008.22	8145.24	8918.69	8550.23	6621.52	18727.2	2890.37	9621.72	6815.92	8030.15	10413.1	0.848791	0.654553	0.77116	-0.236519	-0.611418	-0.374899
XP_021990891.1	2	1	12.37	0.642529	2.44525	Low	High	XP_021990891.1 uncharacterized protein LOC110887622 [Helianthus annuus]	16457.5	9696.01	10623.8	15357.3	12530	15437.6	13794.1	67662.7	8472.99	12259.1	14441.6	29976.6	0.848872	0.408956	0.481764	-0.236381	-1.28998	-1.0536
KVI05662.1	1	1	7.55	0.683672	1.25765	Low	High	KVI05662.1 hypothetical protein Ccrd_016007, partial [Cynara cardunculus var. scolymus]	3936.59	3317.34	6759.32	4708.46	7904.62	3881.61	6238.82	7255.91	4129.04	4671.08	5498.23	5874.59	0.849561	0.795134	0.935934	-0.23521	-0.33073	-0.0955206
KVH92394.1	1	1	9.63	0.27825	1.47351	Low	High	KVH92394.1 Glycoside hydrolase family 3 [Cynara cardunculus var. scolymus]	6323.36	7468.59	4545.42	5528.11	10165	5883.59	10524.7	9544.64	6950.86	6112.45	7192.23	9006.74	0.849869	0.678653	0.798539	-0.234688	-0.559254	-0.324565
KVH89660.1	9	1	163.87	0.772423	1.35829	Low	High	KVH89660.1 FAD-dependent pyridine nucleotide-disulfide oxidoreductase [Cynara cardunculus var. scolymus]	37363.1	34598.2	24509.8	50068.2	41845.3	21536	59896.7	22889.6	48249.5	32157	37816.5	43678.6	0.850344	0.736219	0.86579	-0.233881	-0.441793	-0.207912
OTG32046.1	3	1	38.14	0.865076	1.22926	Medium	Low	OTG32046.1 putative pectinacetylesterase/NOTUM [Helianthus annuus]	21628.8	22105.6	23944.9	43393.5	16613.2	19573.3	23297.8	12377	29063.5	22559.8	26526.6	21579.4	0.850457	1.04543	1.22926	-0.23369	0.0640959	0.297786
KVH95124.1	1	1	6.88	0.535463	1.35135	Medium	Low	KVH95124.1 Acyl-CoA dehydrogenase, N-terminal [Cynara cardunculus var. scolymus]	39172.3	25872.5	43490.1	44974.6	54052	28555.1	27029.6	22142	45239.3	36178.3	42527.2	31470.3	0.850709	1.1496	1.35135	-0.233263	0.201134	0.434397
KVI10167.1	5	4	57.1	0.380005	1.52482	Medium	Low	KVI10167.1 Pectinesterase, active site-containing protein [Cynara cardunculus var. scolymus]	50175.7	35373.6	43293	46577	70579.9	34211.7	37973.7	16447.4	44848.7	42947.5	50456.2	33089.9	0.851183	1.2979	1.52482	-0.232459	0.37618	0.608639
CAB65463.1	1	1	9.11	0.283111	1.52684	Medium	Low	CAB65463.1 translation initiation factor 5A precursor protein (eIF-5A) [Senecio vernalis]	8952.57	9623.6	6826.72	11723	9542.32	8562.84	4860.11	3259.12	11416.6	8467.63	9942.72	6511.94	0.851642	1.30032	1.52684	-0.231682	0.37887	0.610552
OTG31485.1	6	6	81.42	0.0260303	1.6715	Low	High	OTG31485.1 putative flavodoxin-like quinone reductase 1 [Helianthus annuus]	53088.4	36298.7	46136.8	57670.6	56764	44628.1	87501.7	76951.6	62074.8	45174.6	53020.9	75509.4	0.852015	0.598265	0.702177	-0.231048	-0.741143	-0.510094
KVI01036.1	2	2	19.7	0.835632	1.25575	Medium	Low	KVI01036.1 Alpha/beta hydrolase fold-1 [Cynara cardunculus var. scolymus]	25825.9	22050	49120.4	32843.2	57928.9	23040	40604.9	17119.1	32909	32332.1	37937.3	30211	0.852249	1.07021	1.25575	-0.230653	0.0978913	0.328544
XP_022040550.1	1	1	13.76	0.852662	1.17264	Medium	High	XP_022040550.1 uncharacterized protein LOC110943103 [Helianthus annuus]	64114.2	99485.2	90200.4	68656.5	151203	77756.1	94204.9	89073.6	96413.3	84599.9	99205.2	93230.6	0.852778	0.907427	1.06408	-0.229759	-0.140147	0.089612
KVI10599.1	1	1	8.8	0.780324	1.41093	Medium	Low	KVI10599.1 hypothetical protein Ccrd_010980 [Cynara cardunculus var. scolymus]	26672.2	32970.3	26366.2	31075.2	55179.8	14574.7	22574.3	19271.5	29617.5	28669.6	33609.9	23821.1	0.85301	1.20354	1.41093	-0.229365	0.26728	0.496645
OTG15287.1	1	1	6.67	0.450647	36.4507	Low	Medium	OTG15287.1 putative auxin efflux carrier [Helianthus annuus]	260.494	115.437	349.01	283.142	115.056	451.227	61.8746	163.773	20415.8	241.647	283.142	6880.47	0.853449	0.0351207	0.0411515	-0.228624	-4.83154	-4.60291
KVH99886.1	1	1	12.27	0.781641	1.38977	Medium	Low	KVH99886.1 Nucleoside phosphorylase [Cynara cardunculus var. scolymus]	220268	46329.7	125875	105006	238871	115949	111705	79779.4	139382	130824	153276	110289	0.853523	1.1862	1.38977	-0.228498	0.246346	0.474843
XP_021993179.1	1	1	7.79	0.0263418	1.61971	Low	High	XP_021993179.1 probable LRR receptor-like serine/threonine-protein kinase At1g07650 isoform X1 [Helianthus annuus]	5670.52	5375.14	6528.97	7151.25	7440.39	5995.31	9860.46	11290.6	7314.75	5858.21	6862.32	9488.6	0.853678	0.617394	0.723217	-0.228236	-0.695736	-0.467499
KVH91456.1	1	1	6.71	0.401481	1.60146	Low	High	KVH91456.1 Homeodomain-like protein [Cynara cardunculus var. scolymus]	3885.48	2238.8	4017.03	5322.3	2676.89	3877.39	5767.66	3097.22	7376.06	3380.44	3958.86	5413.65	0.853891	0.624429	0.731274	-0.227876	-0.679392	-0.451516
CAG18104.1	1	1	6.03	0.0191277	3.74037	Low	High	CAG18104.1 maturase K (chloroplast) [Picris hieracioides]	7614.64	4927.59	3200.81	4178.31	9944.23	4312.51	19394.5	27177.1	12313.3	5247.68	6145.02	19628.3	0.853973	0.267353	0.31307	-0.227737	-1.90318	-1.67544
KVI04300.1	1	1	6.46	0.183081	1.71657	Medium	Low	KVI04300.1 Pentatricopeptide repeat-containing protein [Cynara cardunculus var. scolymus]	7103.09	6268.95	11443.2	7919.48	11353.1	9778.01	4868.73	3187.96	8866.97	8271.75	9683.54	5641.22	0.854208	1.46631	1.71657	-0.227341	0.552186	0.779527
OTG01848.1	1	1	7.06	0.143773	1.84876	Low	High	OTG01848.1 putative zinc finger, C2H2-like protein [Helianthus annuus]	22319.2	19533.6	32289.9	20632.9	36288.5	29862.8	66499.4	30804.6	39768.3	24714.3	28928.1	45690.7	0.854335	0.540903	0.633127	-0.227127	-0.886559	-0.659432
XP_022032824.1	1	1	8.59	0.534236	1.29903	Low	High	XP_022032824.1 uncharacterized protein LOC110933932 [Helianthus annuus]	3377.91	4079.32	1447.67	3316.27	4473.47	2631.06	3602.25	4504.4	3461.1	2968.3	3473.6	3855.92	0.854532	0.769804	0.900849	-0.226793	-0.377436	-0.150643
KVI07826.1	4	4	85.99	0.614898	1.31513	Low	High	KVI07826.1 Aspartic peptidase [Cynara cardunculus var. scolymus]	111031	102887	89120.8	98306.5	159122	97161.1	144791	170713	83031.5	101013	118196	132845	0.85462	0.76038	0.889729	-0.226645	-0.395207	-0.168562
OTG04818.1	6	1	106.84	0.911218	1.16997	Medium	High	OTG04818.1 putative SKU5-similar 6 [Helianthus annuus]	10405.8	8132.87	12065	12747.8	16218.5	6839.23	15011.6	8274.48	10850.2	10201.2	11935.2	11378.8	0.85472	0.896516	1.0489	-0.226476	-0.157599	0.0688776
KVI06882.1	2	2	35.71	0.671407	1.17757	Low	High	KVI06882.1 Aspartic peptidase [Cynara cardunculus var. scolymus]	137888	120821	103794	110127	204259	109729	157503	132998	136373	120834	141372	142291	0.854729	0.849204	0.993535	-0.226461	-0.235818	-0.0093572
KVI04000.1	4	4	45.78	0.437161	1.37385	Medium	Low	KVI04000.1 Ribosomal protein L18e [Cynara cardunculus var. scolymus]	22978.1	16338.4	16927.7	20530	29232.9	16029.6	18940.9	10189.5	18758.8	18748.1	21930.8	15963.1	0.854872	1.17446	1.37385	-0.22622	0.232002	0.458222
KVH90896.1	1	1	7.38	0.62329	1.22121	Medium	Low	KVH90896.1 Lipase/lipooxygenase, PLAT/LH2 [Cynara cardunculus var. scolymus]	9617.06	4469.81	6163.55	8179.16	6208.35	9297.67	7497.37	5302.62	6594.91	6750.14	7895.06	6464.97	0.854983	1.04411	1.22121	-0.226033	0.0622746	0.288307
XP_021975075.1	1	1	6	0.939212	1.1694	Medium	High	XP_021975075.1 uncharacterized protein LOC110870180 [Helianthus annuus]	16478.4	8616.46	61366.6	26489	62992.8	11626	28645.3	8827.35	51926.6	28820.5	33702.6	29799.7	0.855141	0.967139	1.13097	-0.225766	-0.0482047	0.177561
XP_021975040.1	2	1	14.02	0.301186	1.67295	Low	High	XP_021975040.1 calponin homology domain-containing protein DDB_G0272472-like [Helianthus annuus]	21784.3	21657.5	17287.7	29059.4	25330.4	16601.4	53077.4	22048.8	26471.2	20243.2	23663.7	33865.8	0.855452	0.597747	0.69875	-0.225241	-0.742393	-0.517152
KVI08895.1	1	1	7.79	0.480093	4.2439	Medium	Low	KVI08895.1 Protein of unknown function DUF1399 [Cynara cardunculus var. scolymus]	81671.7	50548.8	212417	376377	11399.3	14240	36594.6	6412.02	51721.3	114879	134005	31576	0.857274	3.63819	4.2439	-0.222172	1.86322	2.08539
CBD31788.1	1	1	7.64	0.402841	1.42597	Low	High	CBD31788.1 unnamed protein product [Helianthus annuus]	4269.26	2337.81	3241.8	5860.33	3253.78	2373.65	5444.15	4247.68	4352.34	3282.96	3829.25	4681.39	0.857336	0.701279	0.817974	-0.222068	-0.51194	-0.289873
XP_022030377.1	1	1	8.27	0.268801	1.27881	Medium	Low	XP_022030377.1 uncharacterized protein LOC110931284 [Helianthus annuus]	9.0383e+06	1.03409e+07	1.11012e+07	1.11716e+07	1.07983e+07	1.35778e+07	1.052e+07	6.70228e+06	1.05752e+07	1.01601e+07	1.18492e+07	9.26581e+06	0.857452	1.09652	1.27881	-0.221872	0.132932	0.354804
KVH94137.1	2	1	15.45	0.935572	1.31049	Low	High	KVH94137.1 Translation initiation factor IF2/IF5 [Cynara cardunculus var. scolymus]	10223.1	8795.51	8648.33	9003.22	15481.4	7781.71	21908.1	6178.58	8170.78	9222.33	10755.4	12085.8	0.857457	0.763071	0.889923	-0.221864	-0.390111	-0.168247
OTG34222.1	1	1	7.23	0.369438	1.74383	Medium	Low	OTG34222.1 putative NOP5-like protein [Helianthus annuus]	23560.5	22238.1	18886.8	25774.3	32869.1	16782.6	28628	713.212	13911.7	21561.8	25142	14417.6	0.857601	1.49551	1.74383	-0.221622	0.580642	0.802264
KVI04845.1	1	1	13.85	0.214886	2.05408	Medium	Low	KVI04845.1 hypothetical protein Ccrd_016838 [Cynara cardunculus var. scolymus]	6464.14	8000.38	14943.6	8251.12	16445.5	9591.28	1692.5	3003.94	11996.1	9802.72	11429.3	5564.19	0.857684	1.76175	2.05408	-0.221483	0.817011	1.03849
OTG29739.1	2	2	21.9	0.879045	1.16559	Medium	High	OTG29739.1 putative phenol hydroxylase reductase, NADH:cytochrome b5 reductase (CBR) [Helianthus annuus]	5762.34	13941.8	11136.2	16281.7	8006.61	11658.9	6416.8	15614.5	11114.8	10280.1	11982.4	11048.7	0.857936	0.930436	1.0845	-0.221057	-0.104021	0.117036
KVH92284.1	1	1	8.81	0.322762	1.93	Low	High	KVH92284.1 Pentatricopeptide repeat-containing protein [Cynara cardunculus var. scolymus]	35332.9	38074.4	17129.4	24472.9	36729.1	44266.6	51026.6	94417.7	29291.9	30178.9	35156.2	58245.4	0.858424	0.518133	0.603587	-0.220238	-0.948604	-0.728366
CAM82651.1	3	3	48.92	0.126121	3.13071	Low	High	CAM82651.1 unnamed protein product [Helianthus annuus]	7575.78	15198.2	6789.07	21417	7081.81	5939.19	17984.1	55751.1	18818.1	9854.35	11479.3	30851.1	0.858443	0.319417	0.372088	-0.220205	-1.64649	-1.42628
OTG26752.1	1	1	6.73	0.0681818	1.29936	Low	High	OTG26752.1 hypothetical protein HannXRQ_Chr05g0162161 [Helianthus annuus]	18583.3	18530.3	20267.8	23026.2	24958.5	18851	26150.7	26523.5	21885.1	19127.1	22278.6	24853.1	0.858544	0.769608	0.89641	-0.220035	-0.377805	-0.157769
KVI08209.1	1	1	8.83	0.767205	1.21047	Medium	Low	KVI08209.1 hypothetical protein Ccrd_013423 [Cynara cardunculus var. scolymus]	28425.2	23842.6	38215.4	25862.3	50150.2	29182.5	34262.2	11249.8	41392	30161	35065	28968	0.860146	1.04119	1.21047	-0.217346	0.0582264	0.275573
KVH95078.1	1	1	7.18	0.85527	1.16233	Medium	High	KVH95078.1 NAD-dependent epimerase/dehydratase [Cynara cardunculus var. scolymus]	86664.1	93338	45592.7	120656	73305.3	68254	121703	114061	15792.5	75198.3	87405	83852.3	0.860343	0.896795	1.04237	-0.217017	-0.15715	0.0598665
KVH89237.1	5	5	58.31	0.134515	1.44571	Low	High	KVH89237.1 6-phosphogluconate dehydrogenase, C-terminal-like protein [Cynara cardunculus var. scolymus]	10357.4	8122.77	10238.4	13875.7	9812.21	9688.7	16114.7	14611.7	10792.2	9572.85	11125.6	13839.5	0.860438	0.691703	0.803897	-0.216856	-0.531774	-0.314918
KVH88839.1	2	2	28.67	0.282536	2.08052	Low	High	KVH88839.1 Ribosomal protein S30 [Cynara cardunculus var. scolymus]	12258.5	13510.5	9896.23	17965.9	20533.5	2943.67	28488	26076.4	19638	11888.4	13814.4	24734.1	0.860583	0.480648	0.558514	-0.216613	-1.05695	-0.840334
OTG29452.1	1	1	8.61	0.323827	1.88655	Medium	Low	OTG29452.1 putative transducin/WD40 repeat-like superfamily protein [Helianthus annuus]	21018.6	14532.3	22460.9	13442.2	37340.8	16596.4	18579.5	13534.5	3601.7	19337.3	22459.8	11905.2	0.860973	1.62427	1.88655	-0.21596	0.699792	0.915752
XP_022032531.1	1	1	7.9	0.895075	1.16123	Medium	High	XP_022032531.1 uncharacterized protein LOC110933626 [Helianthus annuus]	61854.6	44998.7	52780.2	56132	86728.4	42510.4	81636.5	37975.5	49694.4	53211.2	61790.3	56435.5	0.861158	0.942868	1.09488	-0.21565	-0.0848729	0.130777
KVH94212.1	2	2	29.64	0.459722	1.19473	Medium	Low	KVH94212.1 hypothetical protein Ccrd_003729 [Cynara cardunculus var. scolymus]	14570.8	14829.5	15484.8	16331.2	21464.8	14315.3	11297.3	15726.4	16594	14961.7	17370.5	14539.2	0.86133	1.02906	1.19473	-0.215361	0.0413219	0.256683
OTG09632.1	8	5	117.69	0.24317	1.50914	Low	High	OTG09632.1 putative peroxidase superfamily protein [Helianthus annuus]	47343	33630	43061.9	48710.1	50550.7	44686	59060.4	87071.2	41054.4	41345	47982.3	62395.3	0.861672	0.662629	0.769004	-0.214789	-0.593726	-0.378937
KVH94972.1	1	1	8.53	0.399819	1.54659	Low	High	KVH94972.1 Neutral/alkaline nonlysosomal ceramidase [Cynara cardunculus var. scolymus]	19363.7	14927.5	12558.7	19519	25634.4	9212.87	29379.7	26557.1	16521.2	15616.7	18122.1	24152.6	0.861748	0.646582	0.750314	-0.214662	-0.629095	-0.414433
OTG16876.1	1	1	7.13	0.90046	1.15859	Medium	High	OTG16876.1 putative acid phosphatase, class B-like, HAD-like domain protein [Helianthus annuus]	37875.6	111579	79667.5	118252	55796.1	91409.6	94067.8	25538.4	131018	76374	88485.9	83541.5	0.863121	0.914205	1.05919	-0.212366	-0.129411	0.0829546
OTF86322.1	3	3	36.51	0.119504	1.69132	Low	High	OTF86322.1 putative glucose-6-phosphate 1-dehydrogenase X [Helianthus annuus]	1614.74	1447.34	1180.16	1177.3	1346.37	2390.97	2425.4	1853.45	2896.14	1414.08	1638.21	2391.66	0.863186	0.591255	0.684968	-0.212257	-0.758148	-0.545891
KVI03320.1	2	2	28.05	0.362448	1.44317	Low	High	KVI03320.1 Macrophage migration inhibitory factor [Cynara cardunculus var. scolymus]	40468	44057.4	22458.4	49463.9	43746.9	30723.9	57784.7	60321	36290.4	35661.3	41311.5	51465.4	0.863228	0.692918	0.802705	-0.212186	-0.529243	-0.317057
KVH94717.1	4	4	54.42	0.658698	1.33632	Low	High	KVH94717.1 Leucine-rich repeat-containing protein [Cynara cardunculus var. scolymus]	49006.3	53146.9	30645.9	67067.9	48422.6	38342.3	78111.4	34712.6	64637.9	44266.3	51277.6	59154	0.863269	0.748324	0.86685	-0.212119	-0.418265	-0.206146
OTG16699.1	2	2	29.11	0.460429	1.24846	Low	High	OTG16699.1 putative UV excision repair protein Rad23, UBA-like, Ubiquitin-related domain protein [Helianthus annuus]	8394.22	11627.1	9470.26	10330.8	15373.4	8444.95	11662.5	13821.5	11335.2	9830.54	11383.1	12273.1	0.863611	0.800985	0.927484	-0.211546	-0.320152	-0.108606
OTG08945.1	1	1	6.53	0.224959	14.4349	Low	High	OTG08945.1 putative mlo-related protein [Helianthus annuus]	4120.49	2622.84	2591.19	2529.54	4476.27	3800.62	8992.35	122571	3179.56	3111.51	3602.14	44914.3	0.863793	0.0692766	0.0802005	-0.211242	-3.85149	-3.64025
OTG21667.1	1	1	8.11	0.487447	1.56132	Low	High	OTG21667.1 putative glycoside hydrolase, family 29 [Helianthus annuus]	27287.1	35281.8	23861.6	27725.3	40577.9	31646.6	49558.2	63301.7	22085.4	28810.1	33316.6	44981.7	0.864738	0.640485	0.74067	-0.209665	-0.642763	-0.433098
BAN63362.1	1	1	7.89	0.643951	1.19325	Medium	Low	BAN63362.1 matairesinol O-methyltransferase [Carthamus tinctorius]	24751.2	28021	22594.2	26975.9	38120.1	22040.3	29858	18577.7	24588.4	25122.1	29045.4	24341.4	0.864925	1.03208	1.19325	-0.209353	0.0455491	0.254902
OTG24773.1	1	1	8.55	0.435394	1.88899	Low	High	OTG24773.1 putative dimethylaniline monooxygenase, N-oxide-forming [Helianthus annuus]	1132.08	1565.27	612.596	142.411	1409.56	2273.71	2399.5	1912.35	1940.59	1103.32	1275.23	2084.15	0.86519	0.529384	0.611871	-0.208911	-0.917612	-0.708701
OTG21787.1	3	1	31.42	0.350045	1.46971	Low	High	OTG21787.1 putative lactate/malate dehydrogenase family protein [Helianthus annuus]	4772.84	7132.98	6186.77	6983.5	7935.77	5992.07	10009.3	11229.6	5351.92	6030.87	6970.45	8863.61	0.865205	0.680407	0.786412	-0.208886	-0.555529	-0.346643
OTG25411.1	5	5	65.85	0.166732	2.88272	Low	High	OTG25411.1 putative annexin 2 [Helianthus annuus]	12294.3	20855.2	7468.36	30222.4	12085.7	4599.59	38446.7	58215.6	20427.5	13539.3	15635.9	39029.9	0.865908	0.346895	0.400614	-0.207715	-1.52743	-1.31972
BAN91670.1	6	1	106.29	0.925316	1.17142	Low	High	BAN91670.1 cinnamyl alcohol dehydrogenase 1 [Carthamus tinctorius]	40212.5	27659.7	18831.1	22188.2	52906.2	25011.4	53314.9	24429.3	23821.6	28901.1	33368.6	33855.3	0.866117	0.853667	0.985625	-0.207366	-0.228255	-0.020889
XP_022007758.1	1	1	10.16	0.116692	3.87355	Medium	Low	XP_022007758.1 uncharacterized protein LOC110907032 [Helianthus annuus]	14951	4105.47	16350.2	21339.3	7140.96	12389.9	9449.41	167.154	934.521	11802.2	13623.4	3517.03	0.86632	3.35573	3.87355	-0.207029	1.74663	1.95366
XP_022039950.1	1	1	11.09	0.0085952	1.86347	Low	High	XP_022039950.1 uncharacterized protein LOC110942482 [Helianthus annuus]	20316.5	17878.4	15137.9	22964.6	22549.8	16005.9	38394.1	31819.8	29170.5	17777.6	20506.8	33128.1	0.866916	0.536632	0.619013	-0.206036	-0.897995	-0.691958
OTG32546.1	2	1	36.71	0.514558	1.32383	Low	High	OTG32546.1 putative cupredoxin [Helianthus annuus]	8081.01	11657.9	12345.4	7531.06	16857.5	12620.3	13762	16946.5	11765.7	10694.8	12336.3	14158	0.866935	0.755385	0.871328	-0.206005	-0.404716	-0.198711
OTF99290.1	1	1	9.43	0.854444	1.23887	Medium	Low	OTF99290.1 putative endonuclease/exonuclease/phosphatase family protein [Helianthus annuus]	7016.53	6553.13	9288.5	5650.28	14418.9	6279.15	8776.49	3743.35	8748.19	7619.39	8782.77	7089.34	0.867539	1.07477	1.23887	-0.205	0.104024	0.309024
KVI06902.1	1	1	10.35	0.326722	1.6602	Low	High	KVI06902.1 Pentatricopeptide repeat-containing protein [Cynara cardunculus var. scolymus]	145803	94290.1	89658.3	84579.1	170647	124749	177635	261543	108274	109917	126659	182484	0.867823	0.602339	0.694081	-0.204528	-0.731353	-0.526825
OTG03427.1	1	1	9.72	0.245111	3.14873	Medium	Low	OTG03427.1 putative NB-ARC [Helianthus annuus]	2087.41	7304.3	5625.54	10067.6	5628.01	1607.67	2279.4	1213.2	2002.72	5005.75	5767.77	1831.77	0.867883	2.73273	3.14873	-0.204427	1.45034	1.65477
KVH97941.1	2	1	14.85	0.516517	1.25989	Low	High	KVH97941.1 hypothetical protein Ccrd_023861, partial [Cynara cardunculus var. scolymus]	5303.1	4252.16	7198.54	4334.65	8286.64	6676.17	7912.5	6375.03	6820.36	5584.6	6432.49	7035.96	0.868186	0.793722	0.91423	-0.203923	-0.333294	-0.129371
OTG23381.1	1	1	10.89	0.322702	2.15253	Low	High	OTG23381.1 putative germin [Helianthus annuus]	1.07567e+06	705537	539351	1.38468e+06	817148	470512	1.47357e+06	2.78704e+06	734463	773520	890779	1.66502e+06	0.868364	0.464571	0.534995	-0.203628	-1.10603	-0.902403
OTF91794.1	4	2	56.85	0.754632	1.24601	Medium	Low	OTF91794.1 putative beta-galactosidase [Helianthus annuus]	3119.24	4111.05	3887.91	4089.29	6065.12	2644.22	4603.92	1752.81	3914.95	3706.07	4266.21	3423.89	0.868702	1.08241	1.24601	-0.203067	0.11425	0.317317
OTF97506.1	2	2	19.53	0.0612076	2.36553	Low	High	OTF97506.1 putative dehydratase family [Helianthus annuus]	3740.05	3833.32	2415.12	4645.09	4112.14	2737.77	6273	12330.2	5024.8	3329.49	3831.67	7876	0.868941	0.422739	0.486499	-0.202669	-1.24216	-1.03949
OTG23900.1	1	1	9.81	0.747667	1.362	Low	High	OTG23900.1 putative thioredoxin-like protein [Helianthus annuus]	57607.1	27606	46772.2	37083	67769.8	46979.5	97019.4	35346.3	47398.4	43995.1	50610.8	59921.4	0.869283	0.734214	0.84462	-0.202103	-0.445728	-0.243626
OTG20727.1	1	1	6.82	0.88956	1.35152	Low	High	OTG20727.1 putative ATPase family associated with various cellular activities (AAA) [Helianthus annuus]	98703.1	35669	80539.7	133192	51466.1	62530.5	83240.4	41176.1	166041	71637.2	82396.3	96819.1	0.869423	0.739908	0.851034	-0.201869	-0.434582	-0.232712
KVH98165.1	1	1	10.48	0.694041	1.46626	Low	High	KVH98165.1 cytochrome P450 [Cynara cardunculus var. scolymus]	31959.9	33102.4	44166.8	42978.4	57099.8	25498.1	37119.8	89826.6	33211.7	36409.7	41858.8	53386	0.869822	0.682008	0.784077	-0.201208	-0.55214	-0.350932
KVH92302.1	1	1	9.06	0.997126	1.26341	Medium	Low	KVH92302.1 Armadillo [Cynara cardunculus var. scolymus]	5351.23	14585.1	12486.1	3196.65	20776.7	13265	12981.3	7283.23	9209.88	10807.5	12412.8	9824.8	0.870674	1.10002	1.26341	-0.199796	0.137531	0.337326
OTG09615.1	1	1	6.65	0.647501	1.49002	Low	High	OTG09615.1 hypothetical protein HannXRQ_Chr10g0278411 [Helianthus annuus]	17325.6	23266.3	16305.2	22231.2	33445.4	9656.81	32542.1	37245.9	14989.6	18965.7	21777.8	28259.2	0.870874	0.671134	0.770644	-0.199465	-0.575327	-0.375863
OTG02741.1	5	1	50.15	0.813291	1.18431	Low	High	OTG02741.1 putative glutathione peroxidase [Helianthus annuus]	19198.2	12489.5	18504.9	14584.2	29195.5	13837.1	19978.2	24563	14902.5	16730.9	19205.6	19814.6	0.871145	0.844372	0.969266	-0.199015	-0.24405	-0.045035
OTG16159.1	9	4	133.38	0.535205	1.29553	Low	High	OTG16159.1 putative allene oxide synthase [Helianthus annuus]	69625.1	58113.4	49251.3	77582.9	81892.1	43674.3	84072.3	57425.1	87797.5	58996.6	67716.4	76431.6	0.87123	0.771887	0.885974	-0.198874	-0.373539	-0.174664
pdb	19	7	254.38	0.535205	1.29553	Low	High	3DBM	70255	58639.1	49696.9	78284.8	82633	44069.5	84832.9	57944.7	88591.9	59530.3	68329.1	77123.1	0.87123	0.771887	0.885974	-0.198874	-0.373539	-0.174664
KVH95354.1	1	1	7.88	0.0145911	1.74473	Low	High	KVH95354.1 High mobility group (HMG) box domain-containing protein [Cynara cardunculus var. scolymus]	12871.8	8745.95	10265.2	11645.3	10922.8	14006.1	18708.5	21489.9	15428.7	10627.6	12191.4	18542.4	0.871732	0.573153	0.657488	-0.198043	-0.803007	-0.604964
KVH99423.1	3	1	31.81	0.220217	2.02136	Low	High	KVH99423.1 hypothetical protein Ccrd_022342 [Cynara cardunculus var. scolymus]	5350.54	4274.82	3760.18	2983.53	6225.46	6144.01	10759.5	11946.8	4350.69	4461.85	5117.67	9018.99	0.871851	0.494717	0.567433	-0.197846	-1.01533	-0.817479
XP_022040228.1	1	1	7.78	0.736376	1.29744	Low	High	XP_022040228.1 gelsolin-related protein of 125 kDa-like [Helianthus annuus]	19507.2	32843.5	22929.1	22610.4	41456.8	22265.1	34611.7	43645.7	19413.3	25093.3	28777.5	32556.9	0.871977	0.770751	0.883912	-0.197638	-0.375663	-0.178025
OTG08722.1	2	1	25.8	0.696039	1.53295	Low	High	OTG08722.1 putative disease resistance-responsive (dirigent-like protein) family protein [Helianthus annuus]	33418.2	22744.3	29892.3	23837.3	52656.5	22182.7	52351.1	60756.5	18809.9	28684.9	32892.2	43972.5	0.872089	0.652337	0.748017	-0.197453	-0.616311	-0.418858
KVI05529.1	1	1	11.08	0.720147	1.78615	Low	High	KVI05529.1 Mog1/PsbP, alpha/beta/alpha sandwich [Cynara cardunculus var. scolymus]	13587.8	17376.4	8212.7	10543.8	21613.8	12751.5	34403.6	28991.9	6580.17	13059	14969.7	23325.2	0.872361	0.559865	0.641781	-0.197003	-0.83685	-0.639847
OTG14511.1	2	2	20.25	0.114477	2.14801	Low	High	OTG14511.1 putative cytochrome c oxidase, subunit VIb [Helianthus annuus]	15132.1	12132.6	17484.8	18092.2	19712.3	13491.7	21793.5	53609.5	20719.2	14916.5	17098.7	32040.7	0.872373	0.465547	0.533656	-0.196983	-1.103	-0.906019
KVH98370.1	5	1	57.77	0.491412	1.42468	Low	High	KVH98370.1 cytochrome P450 [Cynara cardunculus var. scolymus]	4696.01	2822.7	3285.64	5041.77	4807.75	2532.77	5019.14	3477.19	6896.38	3601.45	4127.43	5130.91	0.872565	0.701914	0.804425	-0.196665	-0.510634	-0.313969
OTG31037.1	1	1	7.12	0.0861157	2.40031	Low	High	OTG31037.1 putative DNA polymerase V family [Helianthus annuus]	3579.49	3301.65	2504.58	2859.16	5303.34	2586.56	9345.86	9401.29	3781.49	3128.57	3583.02	7509.55	0.873168	0.416613	0.477128	-0.19567	-1.26322	-1.06755
KVI06750.1	3	3	39.74	0.4059	1.4224	Low	High	KVI06750.1 Aspartic peptidase [Cynara cardunculus var. scolymus]	27456	33206.1	25403.6	26154.8	43807.3	28596.2	48991.7	47490.4	25937.9	28688.6	32852.8	40806.6	0.873248	0.703037	0.805083	-0.195537	-0.508327	-0.31279
OTG32104.1	1	1	9.09	0.97395	1.14465	Medium	High	OTG32104.1 putative DDB1-CUL4 associated factor 1 [Helianthus annuus]	5375.39	6892.52	7801.06	5341.43	12469.2	5161.44	6805.91	6343.76	7498.95	6689.66	7657.35	6882.87	0.873626	0.971928	1.11252	-0.194912	-0.0410785	0.153834
OTF90881.1	1	1	8.63	0.357344	1.1442	Medium	High	OTF90881.1 hypothetical protein HannXRQ_Chr16g0504461 [Helianthus annuus]	8946.12	9000.12	11019.1	10397.3	10835.1	11909.9	9872.08	9744.43	12366.4	9655.11	11047.4	10661	0.873971	0.90565	1.03625	-0.194343	-0.142975	0.0513683
OTF94859.1	2	1	20.55	0.796642	1.14404	Medium	High	OTF94859.1 putative disease resistance-responsive (dirigent-like protein) family protein [Helianthus annuus]	4939.07	5985.59	7321.28	5607.98	9592.24	5673.91	6471.6	6179.89	7052.19	6081.98	6958.05	6567.89	0.874093	0.926017	1.0594	-0.194141	-0.110889	0.0832518
OTG27707.1	1	1	9.99	0.422925	1.43175	Low	High	OTG27707.1 putative berberine/berberine-like, FAD-binding, type 2 [Helianthus annuus]	28769.3	27721.9	21425.3	46323.9	24063.6	18705.4	45691.1	27932.8	37933.2	25972.2	29697.6	37185.7	0.874554	0.698445	0.798631	-0.193381	-0.517781	-0.324399
XP_022027099.1	1	1	6.39	0.872403	1.20053	Low	High	XP_022027099.1 protein FAR1-RELATED SEQUENCE 5-like [Helianthus annuus]	9508.46	18637	5414.31	16807.5	10176.2	11389.8	17836	5158.63	17294.7	11186.6	12791.2	13429.8	0.874557	0.832968	0.952446	-0.193376	-0.263667	-0.0702912
KVH90977.1	2	2	19.15	0.163895	1.36042	Low	High	KVH90977.1 Nucleotide-binding, alpha-beta plait [Cynara cardunculus var. scolymus]	33438.5	33095.5	37000.8	43642.7	35517.4	39224	39855.7	61125.5	39869.4	34511.6	39461.4	46950.2	0.874567	0.735068	0.840494	-0.193359	-0.44405	-0.250691
OTG22766.1	1	1	7.54	0.368392	1.97687	Medium	Low	OTG22766.1 putative substrate carrier protein [Helianthus annuus]	16061.6	22756.7	48008.4	28737.5	50843.4	19687.6	17340.9	1438.62	31435.3	28942.2	33089.5	16738.3	0.874666	1.7291	1.97687	-0.193196	0.790024	0.98322
OTG11988.1	10	1	190.72	0.104453	1.53083	Low	High	OTG11988.1 putative malate dehydrogenase [Helianthus annuus]	6428.29	9058.17	6347.22	9274.29	9107.34	6576.76	12602.9	8535.31	12285.4	7277.9	8319.46	11141.2	0.874804	0.653242	0.746729	-0.192969	-0.614312	-0.421342
KVH92849.1	7	1	104.39	0.764303	1.1847	Low	High	KVH92849.1 Band 7 protein [Cynara cardunculus var. scolymus]	32882.3	16144.9	47567.9	32926.7	57814.8	19625.9	26413.3	2161.07	85861.7	32198.4	36789.1	38145.3	0.875215	0.844098	0.964446	-0.192291	-0.244518	-0.0522271
KVI04094.1	1	1	19.51	0.510974	1.4671	Medium	Low	KVI04094.1 Cold-shock conserved site-containing protein, partial [Cynara cardunculus var. scolymus]	45297.2	46527.6	64497.6	68452.5	78103.5	31990.9	65883.8	19917.7	35899.3	52107.5	59515.7	40566.9	0.875525	1.28448	1.4671	-0.19178	0.361187	0.552967
KVI10733.1	6	1	104.8	0.00860079	1.42188	Low	High	KVI10733.1 hypothetical protein Ccrd_010882 [Cynara cardunculus var. scolymus]	55809.9	66979.2	59706.7	73737.7	67972.6	66688.6	82729.1	97860.5	78896.6	60831.9	69466.3	86495.4	0.875704	0.703297	0.803121	-0.191485	-0.507795	-0.31631
ABO42689.1	7	1	115.03	0.517987	1.57003	Medium	Low	ABO42689.1 putative ADP-ribosylation factor, partial [Petasites fragrans]	5987.34	2712.98	12888.7	8559.18	7636.86	8453.42	5797.83	844.959	9057.25	7196.32	8216.49	5233.35	0.87584	1.37509	1.57003	-0.191261	0.459527	0.650788
KVI08628.1	2	2	18.11	0.0116015	1.74252	Low	High	KVI08628.1 Glutathione S-transferase/chloride channel, C-terminal [Cynara cardunculus var. scolymus]	21295.5	23932.2	22513.1	22328.3	32651.1	22346	41680.6	43397.7	32961.2	22580.2	25775.1	39346.5	0.876048	0.573882	0.655081	-0.190919	-0.801174	-0.610255
OTF88149.1	9	1	157.08	0.438868	1.24501	Low	High	OTF88149.1 putative ubiquitin-40S ribosomal protein S27a [Helianthus annuus]	37654.8	35929.7	46230.4	33776.7	60629.5	42293.4	55965.2	46005.9	47199.9	39938.3	45566.5	49723.7	0.876483	0.803205	0.916395	-0.190201	-0.31616	-0.125958
OTG28779.1	11	3	189.96	0.438868	1.24501	Low	High	OTG28779.1 putative ubiquitin [Helianthus annuus]	54240.9	51756	66593.8	48654.5	87335.4	60922.7	80616.6	66270.5	67990.4	57530.2	65637.6	71625.8	0.876483	0.803205	0.916395	-0.190201	-0.31616	-0.125958
OTG24455.1	1	1	6.66	0.457469	1.56859	Medium	Low	OTG24455.1 putative apoptotic protease-activating factor 1 [Helianthus annuus]	13750	8529.91	23385.2	14514.6	22965.3	14598.7	12059.8	3585.97	17555.2	15221.7	17359.5	11067	0.87685	1.37542	1.56859	-0.189599	0.459868	0.649467
OTG10341.1	1	1	11.49	0.785272	1.14007	Medium	High	OTG10341.1 putative glycosyl transferase, family 8, nucleotide-diphospho-sugar transferase [Helianthus annuus]	198332	132732	103894	107898	207126	180861	192153	27520.9	222142	144986	165295	147272	0.877137	0.984479	1.12238	-0.189127	-0.0225677	0.166559
OTG13003.1	1	1	10.24	0.477112	1.50843	Low	High	OTG13003.1 putative tetratricopeptide repeat (TPR)-like superfamily protein [Helianthus annuus]	16862.8	22579.8	13621.9	15630.2	29222.6	15635.6	28580.7	36165.8	15297.7	17688.1	20162.8	26681.4	0.877266	0.662939	0.755687	-0.188913	-0.593052	-0.404138
KVH97440.1	1	1	6.31	0.96368	1.13987	Medium	High	KVH97440.1 Interphotoreceptor retinol-binding [Cynara cardunculus var. scolymus]	3806.73	4489.41	4173.91	4091.16	7373.02	2750.09	4009.76	3139.28	5324.56	4156.69	4738.09	4157.87	0.877292	0.999716	1.13955	-0.188871	-0.000409879	0.188461
OTG12503.1	1	1	8.13	0.609349	1.19987	Medium	Low	OTG12503.1 putative alpha/Beta hydrolase fold protein [Helianthus annuus]	6502.73	9302.66	9833.47	8742.58	10076.3	10397.6	4966.93	11757	7625.75	8546.29	9738.8	8116.56	0.87755	1.05294	1.19987	-0.188447	0.07443	0.262877
ABI18156.1	3	1	47.24	0.214208	2.30839	Low	High	ABI18156.1 hexokinase [Helianthus annuus]	5073.5	3506.16	2177.57	5407.45	5173.95	1668.36	11936.7	8654.95	4240.24	3585.74	4083.26	8277.29	0.878158	0.433203	0.493308	-0.187447	-1.20689	-1.01944
OTG13373.1	2	1	20.46	0.915561	1.13835	Medium	High	OTG13373.1 putative alpha/Beta hydrolase fold protein [Helianthus annuus]	89687.1	141573	91013.8	137502	147672	81685.4	174086	71713.8	107164	107425	122287	117655	0.878466	0.913049	1.03937	-0.186942	-0.131236	0.0557052
KVH98559.1	1	1	16.11	0.963399	1.17119	Low	High	KVH98559.1 hypothetical protein Ccrd_023217 [Cynara cardunculus var. scolymus]	3497.62	2585.51	2981.17	3674.86	4451.17	2188.34	5234.16	1198.05	4183.83	3021.43	3438.13	3538.68	0.878802	0.85383	0.971585	-0.18639	-0.227979	-0.0415884
CAV26567.1	6	1	102.77	0.6641	1.32819	Low	High	CAV26567.1 unnamed protein product [Helianthus annuus]	18168	19501.4	12997.3	17296.5	28713.5	11637.5	31320.4	16219.1	19755.7	16888.9	19215.8	22431.8	0.878906	0.752902	0.856635	-0.186219	-0.409466	-0.223247
OTG29603.1	1	1	9.34	0.643035	1.55183	Low	High	OTG29603.1 putative thioredoxin family protein [Helianthus annuus]	20360.6	11848	7064.7	21126.3	18366.9	5183.41	32678.8	13187.4	15079.3	13091.1	14892.2	20315.2	0.879058	0.644401	0.733059	-0.18597	-0.633968	-0.447998
OTG15315.1	1	1	9.77	0.148579	1.68276	Low	High	OTG15315.1 hypothetical protein HannXRQ_Chr09g0259071 [Helianthus annuus]	20825.5	23154.5	14311.9	29153.5	24882.3	12221.9	29876.4	34324.2	33890.4	19430.6	22085.9	32697	0.879774	0.594263	0.675473	-0.184795	-0.750826	-0.566031
OTG15723.1	1	1	7.04	0.314824	1.70614	Low	High	OTG15723.1 hypothetical protein HannXRQ_Chr09g0263541 [Helianthus annuus]	2872.34	9875.41	3632.39	9823.17	5352.89	3439.71	10499.7	10443.3	7003.86	5460.05	6205.26	9315.63	0.879906	0.586117	0.666113	-0.184578	-0.77074	-0.586162
OTF87858.1	1	1	8.24	0.582362	1.19154	Low	High	OTF87858.1 putative armadillo-like helical [Helianthus annuus]	40071.3	64076.7	45035.5	43986.7	74160.3	51318.5	66677.5	56863.2	54217.2	49727.8	56488.5	59252.6	0.880317	0.83925	0.95335	-0.183905	-0.252827	-0.0689226
KVI05281.1	7	2	68.39	0.417966	1.37485	Low	High	KVI05281.1 6-phosphogluconate dehydrogenase, C-terminal [Cynara cardunculus var. scolymus]	13168.6	16294.9	16357.3	17755.7	21582.7	12705.3	29025.6	18138.7	15832.3	15273.6	17347.9	20998.9	0.880431	0.727354	0.826134	-0.183718	-0.459271	-0.275553
KVH94218.1	1	1	10.94	0.145357	1.75933	Low	High	KVH94218.1 Wound-inducible basic [Cynara cardunculus var. scolymus]	18964	18488.2	15460.9	30754.2	18769.1	10572	37001	28957	27133.7	17637.7	20031.8	31030.5	0.880488	0.568399	0.645551	-0.183625	-0.815024	-0.631398
KVH95848.1	1	1	9.05	0.0492462	1.84811	Low	High	KVH95848.1 Heat shock protein 70 family [Cynara cardunculus var. scolymus]	7285.38	3134.95	4903.35	6619.58	5926.37	4830.32	10177.5	9436.17	8706.14	5107.89	5792.09	9439.94	0.881874	0.541094	0.613573	-0.181356	-0.88605	-0.704694
OTF90304.1	3	1	34.23	0.772524	1.13461	Low	High	OTF90304.1 putative purple acid phosphatase [Helianthus annuus]	4349.33	7897.52	7283.49	6245.71	9887.12	6000.42	8882.11	6101.74	7175.49	6510.11	7377.75	7386.45	0.882398	0.881358	0.998822	-0.180499	-0.182199	-0.00170036
KVH89401.1	2	2	12.45	0.799769	1.6329	Low	High	KVH89401.1 Trypsin-like cysteine/serine peptidase domain-containing protein [Cynara cardunculus var. scolymus]	23357.7	40726.9	80425.4	58636	85394.2	19719.3	151373	54839.7	29757.8	48170	54583.2	78657	0.882506	0.612406	0.693939	-0.180322	-0.70744	-0.527118
KVI05134.1	2	2	17.69	0.104328	1.51585	Low	High	KVI05134.1 H/ACA ribonucleoprotein complex, subunit Gar1, eukaryote [Cynara cardunculus var. scolymus]	8039.94	5173.76	5240.94	6826.87	7554.95	6516.36	9853.85	11041.4	7079.19	6151.55	6966.06	9324.8	0.883074	0.659697	0.747046	-0.179394	-0.600124	-0.42073
KVH97191.1	1	1	8.17	0.972902	1.13595	Low	High	KVH97191.1 Concanavalin A-like lectin/glucanase, subgroup [Cynara cardunculus var. scolymus]	8726.66	6621.25	8955.51	6655.31	15226.5	5627.67	12646.6	9547.9	5412.98	8101.14	9169.83	9202.51	0.883456	0.880319	0.996449	-0.178769	-0.183901	-0.00513217
OTG28467.1	1	1	8.24	0.0533338	1.87531	Medium	Low	OTG28467.1 putative lectin protein kinase family protein [Helianthus annuus]	11964.2	6820.09	12027.1	9774.96	12036.6	13063.5	6516.37	4429.27	7651.35	10270.5	11625	6199	0.883478	1.65679	1.87531	-0.178734	0.728393	0.907127
KVI08889.1	1	1	9.11	0.0959811	2.35188	Low	High	KVI08889.1 Disease resistance protein [Cynara cardunculus var. scolymus]	19464.5	21491.2	17520.1	31437.5	22204.1	12482.5	50445.7	62989.3	24092.7	19491.9	22041.4	45842.5	0.884332	0.425193	0.480806	-0.177339	-1.23381	-1.05647
KVH98818.1	1	1	9.3	0.879195	1.37508	Low	High	KVH98818.1 hypothetical protein Ccrd_022953 [Cynara cardunculus var. scolymus]	75531.7	45602.1	52230.5	42881	91826.1	61308.7	47803.1	144149	46438.2	57788.1	65338.6	79463.4	0.884441	0.727229	0.822247	-0.177162	-0.459518	-0.282356
KVH95292.1	4	4	44.34	0.0134402	1.60418	Low	High	KVH95292.1 26S proteasome non-ATPase regulatory subunit Rpn12 [Cynara cardunculus var. scolymus]	16788.5	15867	16663.3	19385.4	20201.9	16174.4	29572.3	28770.8	20773.3	16439.6	18587.2	26372.1	0.884457	0.62337	0.704805	-0.177136	-0.681839	-0.504703
KVH94727.1	4	1	50.46	0.107574	1.42117	Medium	Low	KVH94727.1 Ran GTPase [Cynara cardunculus var. scolymus]	3361.94	3093.25	4482.72	3847.03	4408.41	4105.7	3378.83	2208.01	3111	3645.97	4120.38	2899.28	0.884863	1.25754	1.42117	-0.176475	0.330609	0.507083
XP_021988436.1	2	1	14.79	0.359463	1.46718	Medium	Low	XP_021988436.1 DExH-box ATP-dependent RNA helicase DExH11 [Helianthus annuus]	6099.05	4328.11	7196.37	6302.32	7304.28	6308.18	4133.62	1877.08	7562.79	5874.51	6638.26	4524.5	0.884947	1.29838	1.46718	-0.176336	0.376711	0.553047
CAB71301.2	1	1	18.33	0.0909915	2.50924	Medium	Low	CAB71301.2 vegetative storage protein, VSP [Cichorium intybus]	168813	228556	375628	219216	293873	360357	43636.8	74468.6	229986	257666	291149	116031	0.884997	2.22067	2.50924	-0.176255	1.151	1.32725
KVH88882.1	2	1	16.26	0.325185	1.64914	Medium	Low	KVH88882.1 Bacterial bifunctional deaminase-reductase, C-terminal [Cynara cardunculus var. scolymus]	19246.5	10050.4	21553.4	12468.3	23673.4	21312.1	19511.5	7431.98	7895.29	16950.1	19151.3	11612.9	0.885063	1.45959	1.64914	-0.176147	0.545563	0.72171
OTF90634.1	1	1	7.08	0.836987	1.22879	Medium	Low	OTF90634.1 putative leucine-rich receptor-like protein kinase family protein [Helianthus annuus]	13818.7	14080	19601.4	29261.4	12822.2	11583.9	13677.5	7617.97	22379.7	15833.4	17889.2	14558.4	0.88508	1.08758	1.22879	-0.17612	0.121118	0.297238
KVI08813.1	3	2	26.37	0.77585	1.1735	Medium	Low	KVI08813.1 Bacterial transferase hexapeptide repeat-containing protein [Cynara cardunculus var. scolymus]	11634.6	8261.43	9775.32	8604.6	15359.5	9549.62	12001.5	6922.09	9635.1	9890.45	11171.3	9519.58	0.885348	1.03896	1.1735	-0.175683	0.0551382	0.230821
KVI07172.1	2	1	51.93	0.88255	1.15899	Medium	Low	KVI07172.1 hypothetical protein Ccrd_014467 [Cynara cardunculus var. scolymus]	14198.3	15760.7	22027.8	12229.2	27008.5	19479.6	19679.9	20448.5	10533.8	17329	19572.4	16887.4	0.885376	1.02615	1.15899	-0.175637	0.0372369	0.212874
OTG12163.1	1	1	9.98	0.927313	1.21562	Low	High	OTG12163.1 putative subtilisin-like protease [Helianthus annuus]	15516.1	17694.2	12028.9	12021.9	21584.8	17441.4	24601.7	21808.7	8583.23	15079.7	17016	18331.2	0.886206	0.822625	0.928255	-0.174286	-0.281693	-0.107407
KVH94460.1	3	1	49.92	0.565903	1.51203	Low	High	KVH94460.1 Histone core [Cynara cardunculus var. scolymus]	48770.1	49735.2	46788.2	47774.5	55346.2	60744	48734.7	124993	45959.9	48431.2	54621.6	73229.3	0.886667	0.661363	0.745898	-0.173535	-0.596486	-0.42295
OTG00027.1	1	1	9.3	0.028511	1.88691	Medium	Low	OTG00027.1 putative PWWP domain-containing protein [Helianthus annuus]	9963.33	16586.1	19171.2	18367.7	16111.5	17058.3	8611.76	7913.2	10788.1	15240.2	17179.2	9104.37	0.887133	1.67394	1.88691	-0.172778	0.743251	0.916029
KVI11996.1	1	1	9.85	0.957065	1.12707	Medium	High	KVI11996.1 hypothetical protein Ccrd_009606, partial [Cynara cardunculus var. scolymus]	5006.15	7429.39	8391.13	4991.2	5251.28	13230.7	7603.8	13241.9	2210.6	6942.23	7824.39	7685.43	0.887255	0.903297	1.01808	-0.17258	-0.146728	0.0258514
OTF87085.1	1	1	7.54	0.933223	1.1266	Medium	High	OTF87085.1 hypothetical protein HannXRQ_Chr17g0557931 [Helianthus annuus]	51388.3	23810.5	75365.3	83710.9	56427.1	29487.1	50832.8	14718	97292.5	50188.1	56541.7	54281.1	0.88763	0.924596	1.04165	-0.17197	-0.113106	0.0588648
KVH95467.1	1	1	8.73	0.0771355	4.49315	Low	High	KVH95467.1 Pyridoxal phosphate-dependent transferase [Cynara cardunculus var. scolymus]	233.148	237.968	392.398	185.533	420.689	366.493	728.059	478.552	2673.29	287.838	324.238	1293.3	0.887737	0.222561	0.250706	-0.171795	-2.16773	-1.99593
KVH87963.1	4	2	53.43	0.166028	1.30826	Low	High	KVH87963.1 disulfide isomerase [Cynara cardunculus var. scolymus]	5273.7	3770.63	5404.08	6075.63	4829.17	5362.11	6903.36	5421.21	6577.7	4816.14	5422.3	6300.76	0.888208	0.764374	0.86058	-0.17103	-0.387649	-0.216619
OTG37800.1	1	1	11	0.820731	1.13609	Low	High	OTG37800.1 putative aromatic-L-amino-acid decarboxylase [Helianthus annuus]	45224.3	49161.1	39835.7	70293.1	43593.5	37212.9	63156.6	43722.4	45608.8	44740.4	50366.5	50829.2	0.888297	0.88021	0.990895	-0.170886	-0.184081	-0.0131954
KVI12447.1	1	1	6.04	0.821613	1.34767	Medium	Low	KVI12447.1 DNA mismatch repair protein Msh6 [Cynara cardunculus var. scolymus]	12304.2	12153.6	10714.3	8091.2	24612.3	6883.59	13960.3	6416.83	8997.31	11724	13195.7	9791.48	0.888475	1.19737	1.34767	-0.170597	0.259871	0.430468
OTG25422.1	1	1	6.08	0.54352	1.56603	Medium	Low	OTG25422.1 hypothetical protein HannXRQ_Chr05g0147491 [Helianthus annuus]	18308.4	9860.87	36174.6	26141.4	32665.5	13549.1	16638.2	2252.05	27313.2	21447.9	24118.6	15401.1	0.889268	1.39262	1.56603	-0.169309	0.477803	0.647112
KVI04812.1	1	1	8.62	0.351195	1.69184	Medium	Low	KVI04812.1 hypothetical protein Ccrd_016861 [Cynara cardunculus var. scolymus]	40405.9	16344.9	51590.1	47048.1	43664.8	31070	21229.1	14887.7	35865.6	36113.6	40594.3	23994.1	0.889623	1.5051	1.69184	-0.168734	0.589863	0.758597
XP_022031131.1	2	1	17.3	0.823414	1.16262	Medium	Low	XP_022031131.1 TMV resistance protein N-like [Helianthus annuus]	6560.46	11211.4	19089.2	10934.6	18647.1	11851.3	10099	12064.6	13473.9	12287	13811	11879.2	0.889656	1.03433	1.16262	-0.16868	0.0487024	0.217382
KVH92112.1	1	1	7	0.98858	1.12394	Medium	High	KVH92112.1 ADC synthase [Cynara cardunculus var. scolymus]	10703.6	5069.04	13297	11110.7	17741.8	3819.97	10903	5651.73	14494.7	9689.88	10890.8	10349.8	0.889728	0.936237	1.05227	-0.168564	-0.0950538	0.07351
KVI01912.1	4	1	72.33	0.482129	1.2703	Low	High	KVI01912.1 Regulator of ribonuclease activity A [Cynara cardunculus var. scolymus]	39032.7	36124.5	25929.5	41701	45366.6	26493.6	51665.8	36648.5	40096.1	33695.6	37853.7	42803.5	0.890152	0.787216	0.884362	-0.167876	-0.345168	-0.177292
KVI10885.1	1	1	15.6	0.0613991	1.68634	Low	High	KVI10885.1 Mss4-like protein [Cynara cardunculus var. scolymus]	13667.7	10554	8747.72	9565.8	14253.2	13211.6	21437.5	20109.4	14050.8	10989.8	12343.5	18532.6	0.890332	0.593	0.666045	-0.167585	-0.753895	-0.586309
OTG10355.1	1	1	13.92	0.857062	1.12329	Low	High	OTG10355.1 putative SEC14 cytosolic factor family protein / phosphoglyceride transfer family protein [Helianthus annuus]	48442.2	41749.1	34169.2	54717.9	51420.4	33536.3	60245.6	33115.1	46331.8	41453.5	46558.2	46564.2	0.890359	0.890245	0.999872	-0.16754	-0.167725	-0.000185145
OTG16813.1	1	1	13.57	0.573694	1.60377	Medium	High	OTG16813.1 hypothetical protein HannXRQ_Chr09g0275501 [Helianthus annuus]	32602.7	11383	34352.1	21830.2	46894.9	19252.7	26361.2	6719.57	21776.2	26112.6	29325.9	18285.7	0.890427	1.42804	1.60377	-0.16743	0.514035	0.681465
KVH96223.1	1	1	16.67	0.335173	2.37019	Low	High	KVH96223.1 Cupredoxin [Cynara cardunculus var. scolymus]	16525.3	8216.84	3121.46	16838.1	10218.9	4234.68	24987.1	8649.5	32405.3	9287.85	10430.6	22014	0.890446	0.421907	0.473815	-0.1674	-1.245	-1.0776
KVH87672.1	1	1	9.96	0.870059	1.22902	Low	High	KVH87672.1 Bromodomain-containing protein [Cynara cardunculus var. scolymus]	438034	135458	311256	244260	466376	282564	296298	598508	192568	294916	331067	362458	0.890805	0.813655	0.913392	-0.166818	-0.297512	-0.130694
XP_022007485.1	1	1	10.48	0.208565	1.47007	Low	High	XP_022007485.1 uncharacterized protein LOC110906695 [Helianthus annuus]	40713.8	38817.4	35809.2	42311.4	54804.3	32331.8	40969.2	71793.9	56795.1	38446.8	43149.2	56519.4	0.89102	0.68024	0.76344	-0.166471	-0.555884	-0.389413
OTF84963.1	1	1	8.35	0.389097	1.33464	Medium	High	OTF84963.1 hypothetical protein HannXRQ_Chr17g0534811 [Helianthus annuus]	51283.9	49665.5	47831.6	45377.3	57330.3	64181	52118.3	22714	50211.7	49593.6	55629.5	41681.3	0.891499	1.18983	1.33464	-0.165695	0.250753	0.416449
KVH98991.1	5	3	67.2	0.0602618	2.01581	Low	High	KVH98991.1 Adenylate kinase [Cynara cardunculus var. scolymus]	46555.1	51197.8	33306.4	46197	65510.3	35298.8	74301	123963	65925.9	43686.4	49002	88063.4	0.891523	0.496079	0.55644	-0.165657	-1.01136	-0.845701
OTG18355.1	1	1	8.48	0.205898	1.34228	Low	High	OTG18355.1 putative polyketide cyclase/dehydrase, START-like domain protein [Helianthus annuus]	16420.1	15267.6	13410.1	15648.4	14237.9	20675.8	25068.4	18253.7	17211.8	15032.6	16854	20178	0.891929	0.745	0.835268	-0.165	-0.424688	-0.259688
OTG11449.1	1	1	8.14	0.0243154	2.29122	Low	High	OTG11449.1 putative leucine-rich receptor-like protein kinase family protein [Helianthus annuus]	4092.95	4827.63	3429.04	4810.7	3741	5290.84	9070.15	13262.3	5963.29	4116.54	4614.18	9431.91	0.892149	0.436448	0.489209	-0.164643	-1.19612	-1.03148
KVH98347.1	2	2	23.71	0.830281	1.12045	Medium	High	KVH98347.1 Protein of unknown function DUF4370 [Cynara cardunculus var. scolymus]	5119.09	4062.82	6698.5	6688.19	6610.81	4494.25	4394.36	3912.24	7766.11	5293.47	5931.09	5357.57	0.892496	0.988036	1.10705	-0.164082	-0.0173651	0.146717
OTF92375.1	1	1	6.33	0.751951	1.15455	Medium	Low	OTF92375.1 putative tetratricopeptide-like helical domain-containing protein [Helianthus annuus]	3402.2	1586.68	9433.35	4816.6	5006.83	6317.19	3380	3420.08	7179.97	4807.41	5380.2	4660.02	0.893537	1.03163	1.15455	-0.162401	0.0449253	0.207326
XP_021976093.1	8	2	125.32	0.57933	1.45297	Medium	Low	XP_021976093.1 ADP-ribosylation factor 2 [Helianthus annuus]	27408.7	12209	52655.6	36511.2	33306.2	33447.7	23595.3	8019.47	39456.9	30757.7	34421.7	23690.5	0.893556	1.29831	1.45297	-0.162369	0.376638	0.539007
KVH91664.1	1	1	8.85	0.297748	1.67954	Low	High	KVH91664.1 Proteasome component (PCI) domain-containing protein [Cynara cardunculus var. scolymus]	6543.23	2992.39	7450.81	6968.03	8081.75	3943.58	7129.44	13355.6	8044.44	5662.15	6331.12	9509.82	0.894336	0.5954	0.665746	-0.161112	-0.748069	-0.586957
OTG26935.1	12	12	193.77	0.0174311	1.85394	Low	High	OTG26935.1 putative proteasome subunit alpha type-6 [Helianthus annuus]	65657.1	82496.3	57806.6	94441.6	78251.8	57567.9	107263	142479	132097	68653.3	76753.8	127279	0.894462	0.53939	0.603033	-0.160908	-0.890598	-0.72969
OTG04246.1	1	1	8.47	0.797943	1.11769	Medium	High	OTG04246.1 putative CCAAT-binding factor [Helianthus annuus]	35340.8	56829.7	63376.4	49249.5	71775.7	52828.6	47754.2	69711.2	52023.3	51848.9	57951.3	56496.2	0.894699	0.917742	1.02575	-0.160525	-0.123839	0.036686
KVI03145.1	1	1	7.86	0.883141	1.17849	Medium	Low	KVI03145.1 hypothetical protein Ccrd_018561 [Cynara cardunculus var. scolymus]	26152.1	19770.6	26759.8	25895	38692.7	16645.7	21217.3	21068.1	26644.5	24227.5	27077.8	22976.7	0.894736	1.05444	1.17849	-0.160465	0.0764756	0.236941
KVI02314.1	1	1	11.35	0.251432	1.97343	Low	High	KVI02314.1 Small ubiquitin-related modifier, SUMO, partial [Cynara cardunculus var. scolymus]	11197.9	13312.9	7246.85	11005.3	15020.4	9455.61	15305	35766.1	11600.5	10585.9	11827.1	20890.6	0.895052	0.506731	0.566147	-0.159957	-0.980709	-0.820752
ABH11434.2	4	1	59.12	0.926364	1.11689	Medium	High	ABH11434.2 Mn-superoxide dismutase II [Helianthus annuus]	34563.3	24492.5	34139.4	48840.5	34874.4	20374.2	30957.1	11697.1	57338.1	31065.1	34696.4	33330.8	0.895341	0.932024	1.04097	-0.159492	-0.10156	0.0579312
KVH99070.1	1	1	8.55	0.19097	2.02982	Low	High	KVH99070.1 NO signaling/Golgi transport ligand-binding domain-containing protein [Cynara cardunculus var. scolymus]	3487.51	5706.38	4938.51	4976.39	5563.8	5242.67	6393.49	16609.6	5683.15	4710.8	5260.95	9562.08	0.895427	0.492654	0.550189	-0.159352	-1.02135	-0.862001
OTF84965.1	3	3	37.72	0.686047	1.20326	Medium	Low	OTF84965.1 putative nucleoside diphosphate kinase family protein [Helianthus annuus]	17072.8	17699	17857.7	16304.6	27407.5	15037.2	20281.3	14208.9	14335.2	17543.2	19583.1	16275.1	0.895831	1.07791	1.20326	-0.158701	0.108242	0.266943
AFA26647.1	1	1	20.36	0.553424	1.29919	Medium	Low	AFA26647.1 EPSPS-like protein [Cirsium setosum]	11281.1	8515.35	12124.6	21580	4571.45	9481.22	20604.5	297.71	6524.62	10640.3	11877.6	9142.28	0.895836	1.16386	1.29919	-0.158694	0.218919	0.377613
OTG27145.1	3	2	32.44	0.175507	1.34378	Low	High	OTG27145.1 putative DNA/RNA-binding protein Alba-like protein [Helianthus annuus]	10654.8	12269.7	9838.56	12293.5	14992.5	9276.44	14984.2	16295.5	12746.9	10921	12187.5	14675.5	0.896086	0.744167	0.830464	-0.158291	-0.426302	-0.268011
CBD33896.1	2	2	19.61	0.087833	1.68115	Low	High	CBD33896.1 unnamed protein product [Helianthus annuus]	7926.87	8459.49	9226.36	9501.09	13290.2	5783.9	14496.1	15871.7	12691	8537.57	9525.08	14352.9	0.896326	0.594832	0.663633	-0.157905	-0.749446	-0.591541
KVI08636.1	6	1	77.3	0.967326	1.1153	Medium	High	KVI08636.1 Alcohol dehydrogenase, C-terminal [Cynara cardunculus var. scolymus]	20273.7	14075.4	11269.6	13474.5	25440	11964.2	25076.2	10106	14946.3	15206.2	16959.6	16709.5	0.896616	0.910035	1.01497	-0.157437	-0.136006	0.0214309
OTG29048.1	2	2	18.89	0.0903016	2.61029	Low	High	OTG29048.1 hypothetical protein HannXRQ_Chr04g0117981 [Helianthus annuus]	87729.8	49283.2	48764.6	102505	50162	54492.3	145895	256708	82331.4	61925.9	69053	161645	0.896788	0.383099	0.42719	-0.157161	-1.38421	-1.22705
OTG37025.1	1	1	10.44	0.510077	1.18872	Low	High	OTG37025.1 putative IQ motif, EF-hand binding site [Helianthus annuus]	26294	23020.6	24399.8	23198.4	34801.1	24178.1	31827.2	31915.2	23883.1	24571.5	27392.6	29208.5	0.897012	0.841243	0.937828	-0.156801	-0.249405	-0.0926041
KVH98530.1	6	2	117.39	0.0322659	2.34783	Low	High	KVH98530.1 hypothetical protein Ccrd_023241 [Cynara cardunculus var. scolymus]	9844.23	16247.4	6323.43	15015.2	9131.58	11988.9	25766.2	30486	19852.8	10805	12045.2	25368.3	0.897038	0.425926	0.474814	-0.15676	-1.23133	-1.07457
OTG06764.1	1	1	8.45	0.77354	1.31635	Low	High	OTG06764.1 hypothetical protein HannXRQ_Chr11g0322871 [Helianthus annuus]	37859.2	80797.4	35535	37914	64841.6	69050.7	81603.6	87531.4	33835	51397.2	57268.8	67656.7	0.897473	0.759677	0.846461	-0.156059	-0.396543	-0.240484
KVI03803.1	4	4	38.84	0.0286708	2.11521	Low	High	KVI03803.1 Ribosomal protein L13 [Cynara cardunculus var. scolymus]	11726.1	15419.9	11910.6	18751.2	16100.5	8648.12	33658	24886.6	24068	13018.9	14499.9	27537.6	0.897855	0.472767	0.526552	-0.155445	-1.0808	-0.925353
OTG03542.1	2	2	30.24	0.13581	1.35191	Low	High	OTG03542.1 putative N-terminal nucleophile aminohydrolase [Helianthus annuus]	6674.55	9995.94	7741.28	10112.4	8376.45	8696.53	10764.7	12843.9	9394.02	8137.26	9061.79	11000.8	0.897975	0.739694	0.823735	-0.155253	-0.435	-0.279747
OTG21929.1	7	7	159.83	0.913736	1.16583	Low	High	OTG21929.1 putative aquaporin PIP1-2 [Helianthus annuus]	596234	256948	343214	465896	254023	612262	718980	332016	343794	398798	444060	464930	0.898073	0.85776	0.955112	-0.155096	-0.221354	-0.0662578
KVH91511.1	8	1	116.89	0.785273	1.37515	Low	High	KVH91511.1 hypothetical protein Ccrd_006462 [Cynara cardunculus var. scolymus]	6391.11	9781.3	5361.08	6578.7	4733.64	12660.1	6631.62	16447.9	6532.35	7177.83	7990.81	9870.61	0.89826	0.727192	0.809556	-0.154795	-0.459591	-0.304796
OTF84266.1	1	1	6.45	0.247558	2.50576	Low	High	OTF84266.1 putative START-like domain-containing protein [Helianthus annuus]	12213.6	14898.7	14174	19008.9	19894.8	7054.31	29634.5	60395.1	13424.3	13762.1	15319.4	34484.6	0.898348	0.39908	0.444238	-0.154654	-1.32525	-1.1706
OTG24403.1	1	1	23.44	0.662951	1.30623	Medium	Low	OTG24403.1 putative aspartic peptidase A1 family [Helianthus annuus]	7138.28	4099.99	6818.4	6411.84	9368.01	4318.47	8005.13	3060.33	4321.09	6018.89	6699.44	5128.85	0.898417	1.17354	1.30623	-0.154544	0.230862	0.385406
OTG20549.1	1	1	6.93	0.256333	1.46168	Low	High	OTG20549.1 putative pyruvate dehydrogenase kinase [Helianthus annuus]	44418.1	46071.3	38600.1	36032.3	59956.6	47607.4	55455.8	86192.6	47039.4	43029.8	47865.4	62896	0.898974	0.684143	0.761026	-0.153648	-0.547631	-0.393983
KVH92645.1	3	2	37.94	0.160405	2.06941	Low	High	KVH92645.1 6-phosphogluconate dehydrogenase, C-terminal-like protein [Cynara cardunculus var. scolymus]	3278.98	6271.55	4622.69	8282.54	3457.68	4007.81	6785.94	15209.8	7334.46	4724.4	5249.34	9776.73	0.899999	0.48323	0.536922	-0.152004	-1.04922	-0.897215
KVH90344.1	1	1	13.41	0.128993	1.77014	Low	High	KVH90344.1 hypothetical protein Ccrd_007643 [Cynara cardunculus var. scolymus]	15440.6	24585.7	17778.5	17359.5	27667.8	19182.1	36264.6	44544.6	21513.7	19268.3	21403.1	34107.6	0.900255	0.564926	0.627517	-0.151595	-0.823867	-0.672272
KVH94183.1	1	1	7.22	0.949428	1.137	Low	High	KVH94183.1 2Fe-2S ferredoxin-type domain-containing protein [Cynara cardunculus var. scolymus]	25496.7	23395.7	17533.6	15256.3	33517.7	24979.5	34752	25267.9	15506.6	22142	24584.5	25175.5	0.900649	0.879506	0.976525	-0.150963	-0.185234	-0.0342712
KVH91572.1	4	3	49.14	0.387332	1.66579	Low	High	KVH91572.1 Rapid ALkalinization Factor [Cynara cardunculus var. scolymus]	33577.8	43309.9	57729.3	35416.5	88500.4	25479.6	84692	94820.3	44731.6	44872.3	49798.8	74747.9	0.901072	0.600315	0.666223	-0.150285	-0.736208	-0.585922
KVH98967.1	1	1	14.47	0.392595	1.45308	Medium	Low	KVH98967.1 Lipase, GDSL [Cynara cardunculus var. scolymus]	30298.6	36535	34090.3	54018.8	35118.5	22658.3	34321	19453.6	23162.5	33641.3	37265.2	25645.7	0.902753	1.31177	1.45308	-0.147596	0.391516	0.539112
KVH90089.1	1	1	15.03	0.183612	1.82864	Low	High	KVH90089.1 Glucose/ribitol dehydrogenase, partial [Cynara cardunculus var. scolymus]	25567.5	23187.4	35376.3	50956	25721.3	16450.7	59106.2	59022.6	35717.1	28043.7	31042.7	51282	0.903393	0.546853	0.605333	-0.146574	-0.870774	-0.7242
AIJ03285.1	1	1	7.07	0.109535	1.91964	Low	High	AIJ03285.1 NADH dehydrogenase subunit I (chloroplast) [Atractylodes lancea]	80587.9	71775.6	46984.3	76903.9	92396.6	51225.7	163916	139714	79045.8	66449.3	73508.7	127558	0.903964	0.520932	0.576275	-0.145663	-0.940833	-0.79517
KVH97199.1	1	1	11.8	0.296449	1.32937	Low	High	KVH97199.1 Armadillo-like helical [Cynara cardunculus var. scolymus]	36266.7	40477.9	39971.7	45943	52343.7	30821.7	42781.9	63121.6	49255.7	38905.4	43036.1	51719.7	0.904018	0.752236	0.832103	-0.145577	-0.410742	-0.265165
KVH90060.1	2	2	29.09	0.660543	1.15747	Low	High	KVH90060.1 Exostosin-like protein [Cynara cardunculus var. scolymus]	4998.65	8978.66	5664.26	8451.99	7744.23	5515.08	8574.36	6792.31	7367.91	6547.19	7237.1	7578.19	0.90467	0.863951	0.95499	-0.144536	-0.210978	-0.0664423
KVH89704.1	1	1	8.43	0.622701	1.64345	Low	High	KVH89704.1 ENTH/VHS-like protein, partial [Cynara cardunculus var. scolymus]	26173.4	13400.3	9109.3	15410.7	27453.6	10925.4	33085.7	36464.1	10458.4	16227.7	17929.9	26669.4	0.905062	0.608475	0.672302	-0.143912	-0.71673	-0.572818
KVI09358.1	5	1	113.93	0.49229	1.66458	Medium	Low	KVI09358.1 Aquaporin-like protein [Cynara cardunculus var. scolymus]	10075.6	3123.54	9659.09	6859.62	12359.8	6034.47	6639.1	961.94	7570.32	7619.4	8417.97	5057.12	0.905136	1.50667	1.66458	-0.143794	0.591362	0.735156
KVI08731.1	2	1	17.57	0.121561	1.73495	Low	High	KVI08731.1 Poly A polymerase, head domain-containing protein, partial [Cynara cardunculus var. scolymus]	15125.8	17856.9	15184.2	14749.4	20095.4	18355.9	18934.7	41682.9	22949.3	16055.6	17733.5	27855.6	0.905382	0.576387	0.636623	-0.143401	-0.79489	-0.651489
KVI09099.1	7	4	107.71	0.744402	1.27799	Low	High	KVI09099.1 Eukaryotic porin/Tom40 [Cynara cardunculus var. scolymus]	75851.8	74854.8	101895	76143.8	132027	70806.1	140607	117700	64515.3	84200.5	92992.2	107607	0.905457	0.78248	0.864182	-0.143282	-0.353875	-0.210593
KVI07534.1	1	1	10.12	0.723455	1.39412	Low	High	KVI07534.1 hypothetical protein Ccrd_014078 [Cynara cardunculus var. scolymus]	118135	87337.9	95879.9	63271.3	192175	77321	167622	181107	71394.2	100451	110922	140041	0.905597	0.717297	0.792071	-0.143059	-0.479357	-0.336299
KVI04639.1	2	2	18.77	0.271975	1.70626	Low	High	KVI04639.1 cytochrome b5, heme-binding site-containing protein [Cynara cardunculus var. scolymus]	12189.9	14956.7	16427.3	16749.7	15153.5	16185.6	19110.7	40471.7	14766	14524.6	16029.6	24782.8	0.906114	0.586076	0.646802	-0.142235	-0.770839	-0.628604
KVH88618.1	1	1	9.11	0.22142	1.7101	Low	High	KVH88618.1 3-hydroxyacyl-CoA dehydrogenase, conserved site-containing protein [Cynara cardunculus var. scolymus]	17780.1	26623.3	21032.6	27840.2	22635.8	21735.4	27058.9	59336.4	25506.9	21812	24070.4	37300.7	0.906174	0.584761	0.645308	-0.14214	-0.77408	-0.63194
AMB19685.1	2	2	20.86	0.056069	1.30323	Low	High	AMB19685.1 putative RNA-binding protein 45A, partial [Taraxacum kok-saghyz]	9232.94	7674.19	8121.7	7939.32	10073.3	9603.09	11679.6	11170.1	9768.62	8342.95	9205.24	10872.8	0.906325	0.767325	0.846633	-0.141899	-0.38209	-0.240191
OTG37324.1	3	2	38.97	0.413221	1.69492	Medium	Low	OTG37324.1 putative late embryogenesis abundant protein, group 2 [Helianthus annuus]	2626.34	1506.57	5015.64	4785.21	2867.08	2439.52	3185.61	1728.9	1039.63	3049.52	3363.94	1984.71	0.906532	1.5365	1.69492	-0.141571	0.61965	0.761221
XP_022019950.1	1	1	6.55	0.888753	1.1029	Medium	High	XP_022019950.1 (E)-beta-farnesene synthase-like [Helianthus annuus]	4067.64	4706.91	6983.76	7678.54	5124.73	4576.55	3773.44	6334.08	5728.94	5252.77	5793.27	5278.82	0.906702	0.995065	1.09746	-0.1413	-0.00713704	0.134163
OTF92233.1	1	1	10.45	0.98024	1.20036	Low	High	OTF92233.1 putative C2 domain, Phosphoribosyltransferase [Helianthus annuus]	72705.9	33888.3	35232.2	56633.1	74040.7	25745.6	78372.3	20402	71469.1	47275.5	52139.8	56747.8	0.906706	0.83308	0.918798	-0.141293	-0.263473	-0.12218
KVH92371.1	1	1	6.23	0.63989	1.27717	Low	High	KVH92371.1 Nicotinamide N-methyltransferase-like protein [Cynara cardunculus var. scolymus]	94909.3	82987.9	40415.5	100110	84538.1	55877.9	105071	65843.6	107908	72770.9	80175.2	92940.7	0.907648	0.782982	0.86265	-0.139795	-0.352949	-0.213154
KVI02851.1	2	1	19.09	0.658419	1.18526	Low	High	KVI02851.1 Bacterial transferase hexapeptide repeat-containing protein [Cynara cardunculus var. scolymus]	12734.2	10875.6	8458.53	10385.1	15806.1	9122.52	14776.8	12657.8	10574.8	10689.5	11771.2	12669.8	0.908099	0.843696	0.929079	-0.139079	-0.245206	-0.106127
OTG02941.1	3	2	63.77	0.847464	1.18234	Low	High	OTG02941.1 putative glucose-methanol-choline oxidoreductase, FAD/NAD(P)-binding domain protein [Helianthus annuus]	22569.4	16416.5	21876.2	17266.1	33955.4	15799.5	29844.5	16466.8	25648.5	20287.4	22340.3	23986.6	0.908105	0.845779	0.931367	-0.139069	-0.241647	-0.102578
OTG08476.1	1	1	6.28	0.467482	1.90366	Low	High	OTG08476.1 hypothetical protein HannXRQ_Chr11g0342181 [Helianthus annuus]	9868.62	9186.82	5285.62	8442.62	11768.7	6579.26	8953.21	29283.4	8100.51	8113.69	8930.21	15445.7	0.908567	0.525303	0.578167	-0.138336	-0.928777	-0.790441
KVH93852.1	2	1	30.73	0.105813	3.76679	Low	High	KVH93852.1 Acid phosphatase (Class B) [Cynara cardunculus var. scolymus]	19071.1	13262.2	28000.8	15346.7	35488.6	15566.6	36436.9	36219	154610	20111.4	22133.9	75755.2	0.908621	0.265478	0.292177	-0.138249	-1.91333	-1.77509
XP_021975884.1	1	1	7.22	0.339859	6.16993	Low	High	XP_021975884.1 glutathione S-transferase T3-like [Helianthus annuus]	1522.23	3688.26	4437.52	2932.04	1871.38	5809.55	3130.52	5009.91	51387.1	3216.01	3537.66	19842.5	0.909078	0.162077	0.178287	-0.137524	-2.62525	-2.48773
KVI08790.1	3	2	51.94	0.625975	1.41818	Low	High	KVI08790.1 Peptidase S28 [Cynara cardunculus var. scolymus]	39150.8	32273.6	69172.1	44050.3	56059.4	54547.9	94393.2	33941.3	71056.5	46865.5	51552.5	66463.7	0.909082	0.70513	0.77565	-0.137517	-0.504039	-0.366522
OTG30507.1	1	1	8.37	0.663347	2.29208	Low	High	OTG30507.1 putative gnk2-like domain-containing protein [Helianthus annuus]	5784.32	3838.71	3165.83	2111.39	5535.08	6420.89	9976.64	17410.7	1925.7	4262.96	4689.12	9771.02	0.909117	0.436286	0.479901	-0.137462	-1.19665	-1.05919
ABI18157.1	14	2	286.23	0.968138	1.19756	Low	High	ABI18157.1 cytosolic phosphoglycerate kinase [Helianthus annuus]	51009.4	36248.8	57263.4	56387.4	65282.6	37272.9	59486.3	17172.5	96414.7	48173.9	52981	57691.2	0.909267	0.83503	0.918355	-0.137224	-0.260101	-0.122876
KVH90253.1	1	1	6.4	0.325719	1.26275	Low	High	KVH90253.1 Aminotransferase, class I/classII [Cynara cardunculus var. scolymus]	3537.9	5127.39	3521.53	4433.63	3551.91	5410.03	4536.9	5485.51	5366.49	4062.27	4465.19	5129.64	0.909765	0.791922	0.870469	-0.136434	-0.336569	-0.200135
KVH89551.1	1	1	9.66	0.17585	1.57816	Low	High	KVH89551.1 hypothetical protein Ccrd_008458 [Cynara cardunculus var. scolymus]	16855.9	13942.7	23385.4	22595.4	22659.1	14292.4	21943.3	37851.5	25715.8	18061.3	19849	28503.6	0.909936	0.633651	0.696369	-0.136163	-0.65824	-0.522077
OTG18998.1	1	1	7.37	0.695106	1.19173	Low	High	OTG18998.1 putative BCL-2-associated athanogene 4 [Helianthus annuus]	5906.4	4318.19	7370.91	4781.86	8035.49	6516.76	7607.32	8079	5282.79	5865.17	6444.71	6989.7	0.910075	0.839115	0.922029	-0.135942	-0.253059	-0.117117
OTG09462.1	1	1	6.4	0.848964	1.09703	Medium	High	OTG09462.1 putative protein kinase-like domain-containing protein [Helianthus annuus]	20399.5	26796.6	23119.2	25159.6	33451	18527.4	27186.4	22049.9	27725.2	23438.4	25712.7	25653.8	0.911552	0.913642	1.00229	-0.133603	-0.130299	0.00330372
OTG28358.1	1	1	8.07	0.984265	1.15517	Low	High	OTG28358.1 putative nuclear factor related to kappa-B-binding protein [Helianthus annuus]	28043.9	38409.2	48384	26148.2	69847.1	29859.3	88135.6	19357.3	25163.7	38279	41951.5	44218.9	0.912458	0.865671	0.948725	-0.13217	-0.208109	-0.0759385
OTG17500.1	2	1	17	0.954133	1.28885	Low	High	OTG17500.1 putative berberine/berberine-like, FAD-binding, type 2 [Helianthus annuus]	1622.38	820.278	1498.74	1414.32	2031.95	872.251	2767.94	1664.15	647.749	1313.8	1439.51	1693.28	0.912672	0.775888	0.850128	-0.131831	-0.366079	-0.234248
KVI01372.1	2	1	17.85	0.638368	1.59986	Low	High	KVI01372.1 ATPase, AFG1-like protein, partial [Cynara cardunculus var. scolymus]	10335.1	36896.4	20754.8	19132.8	38805.9	16548.3	29133	62289.1	17346.7	22662.1	24829	36256.3	0.912728	0.625054	0.684819	-0.131743	-0.677947	-0.546205
OTG02784.1	1	1	7.63	0.0650932	2.07833	Low	High	OTG02784.1 putative aspartate/glutamate/uridylate kinase [Helianthus annuus]	185922	138379	66380.3	166739	163705	97447.9	284721	281200	246045	130227	142631	270655	0.913038	0.481155	0.526982	-0.131253	-1.05543	-0.924174
KVH92429.1	15	2	393.22	0.623081	1.18954	Low	High	KVH92429.1 AAA+ ATPase domain-containing protein [Cynara cardunculus var. scolymus]	69508.3	40985.3	52969	56254.2	45375.9	77400.4	60352.4	58974.2	75118.4	54487.5	59676.8	64815	0.913043	0.840662	0.920726	-0.131245	-0.250402	-0.119157
CAX24114.1	4	1	56.93	0.959449	1.09521	Medium	High	CAX24114.1 unnamed protein product [Helianthus annuus]	9301.02	7711.68	10874.1	9049.41	13740.2	7752.38	13161.8	10711.1	5771.64	9295.62	10180.7	9881.52	0.913066	0.940707	1.03027	-0.131209	-0.0881829	0.0430263
OTG08358.1	4	1	60.01	0.959449	1.09521	Medium	High	OTG08358.1 putative ras-related small GTP-binding family protein [Helianthus annuus]	16939.8	14045.1	19804.9	16481.5	25024.7	14119.3	23971.3	19508	10511.8	16929.9	18541.8	17997	0.913066	0.940707	1.03027	-0.131209	-0.0881829	0.0430263
OTG10742.1	1	1	8.97	0.303227	1.66856	Low	High	OTG10742.1 putative NAD(P)-binding domain, Polyketide synthase, enoylreductase domain protein [Helianthus annuus]	150854	249327	189909	112274	313749	220139	352241	422849	209510	196696	215387	328200	0.913222	0.599318	0.656268	-0.130962	-0.738606	-0.607644
OTG19538.1	1	1	6.65	0.0583218	1.48149	Low	High	OTG19538.1 putative 31 kDa ribonucleoprotein [Helianthus annuus]	7229.45	6576.68	6959.08	8048.26	8170.38	6519.41	9776.31	12901	8086.22	6921.74	7579.35	10254.5	0.913236	0.674994	0.739123	-0.13094	-0.567053	-0.436113
KVH94514.1	1	1	10.17	0.399562	2.41613	Low	High	KVH94514.1 Myb/SANT-like domain-containing protein [Cynara cardunculus var. scolymus]	4337.18	3328.78	478.523	4101.78	4578.17	235.542	9164.28	6510.91	4002.92	2714.83	2971.83	6559.37	0.91352	0.413885	0.453066	-0.130491	-1.2727	-1.14221
OTF92718.1	1	1	6.16	0.995461	1.15373	Low	High	OTF92718.1 putative peptidase S10, serine carboxypeptidase, Alpha/Beta hydrolase fold protein [Helianthus annuus]	58650.1	53554.8	56456.7	52883.7	93057.1	38657.4	95869.8	29508.9	69211.5	56220.5	61532.7	64863.4	0.913669	0.866753	0.948651	-0.130257	-0.206308	-0.0760511
KVH98252.1	3	3	36.36	0.455157	1.30521	Low	High	KVH98252.1 Protein of unknown function DUF543 [Cynara cardunculus var. scolymus]	8108.72	5368.24	7452.81	5768.19	11604.1	5531.37	8493.36	9841.11	8983.28	6976.59	7634.54	9105.92	0.91382	0.76616	0.838415	-0.130019	-0.384282	-0.254263
KVI09283.1	8	2	89.59	0.819727	1.176	Medium	Low	KVI09283.1 Band 7 protein [Cynara cardunculus var. scolymus]	9834.64	5423.22	11418.7	7207.15	12347.9	9604.83	10165.5	5020.36	9609.91	8892.19	9719.98	8265.27	0.914836	1.07585	1.176	-0.128414	0.105477	0.233891
XP_021983712.1	7	1	100.16	0.809104	1.0924	Medium	High	XP_021983712.1 proteasome subunit alpha type-1-B-like isoform X1 [Helianthus annuus]	8124.05	7801.64	10178.2	10972.7	10167.2	7375.91	10806.1	7892.78	9656.58	8701.31	9505.29	9451.81	0.915418	0.920597	1.00566	-0.127498	-0.119358	0.00814001
KVI08803.1	1	1	9.62	0.944491	1.20148	Low	High	KVI08803.1 Glutaredoxin, partial [Cynara cardunculus var. scolymus]	4026.93	4142.43	6444.67	5257.44	6381.36	4322.16	8876	6022.71	2659.79	4871.34	5320.32	5852.83	0.915611	0.832305	0.909016	-0.127193	-0.264816	-0.137623
OTG05077.1	1	1	8.95	0.832058	1.80348	Low	High	OTG05077.1 putative S-adenosyl-L-methionine-dependent methyltransferase [Helianthus annuus]	4498.47	8243	5984.63	5262.45	5954.38	9234.37	4305.35	24334.3	5132.42	6242.03	6817.07	11257.4	0.915648	0.554485	0.605565	-0.127135	-0.85078	-0.723645
KVI04699.1	2	1	53.37	0.798679	1.20893	Medium	Low	KVI04699.1 cytochrome b5-like heme/steroid binding domain-containing protein [Cynara cardunculus var. scolymus]	20726.3	25747.8	35639.9	19591.2	40546.8	29489.3	29114.2	27518.8	17504.5	27371.3	29875.8	24712.5	0.916172	1.10759	1.20893	-0.12631	0.147424	0.273734
XP_022023935.1	1	1	12.08	0.837455	1.09097	Medium	High	XP_022023935.1 uncharacterized protein LOC110924208 [Helianthus annuus]	71797.8	54388.4	68507.5	82807.2	63362.5	66235.2	52126.1	76715.9	77892.1	64897.9	70801.6	68911.4	0.916616	0.941759	1.02743	-0.125611	-0.0865702	0.0390411
KVH93233.1	5	1	72.38	0.947729	1.12039	Low	High	KVH93233.1 Small GTPase superfamily [Cynara cardunculus var. scolymus]	27215.6	10851.7	23642.6	16234.3	29682.6	21403.3	23663.9	10576.3	34898.8	20570	22440.1	23046.3	0.916663	0.89255	0.973695	-0.125537	-0.163995	-0.0384581
OTF93380.1	9	1	113.81	0.657875	1.52231	Low	High	OTF93380.1 putative UTP--glucose-1-phosphate uridylyltransferase [Helianthus annuus]	15613.3	22097.3	11393.5	20925.4	19617	12984.6	42940.8	18998.9	12811.8	16368	17842.3	24917.2	0.91737	0.656897	0.716066	-0.124424	-0.60626	-0.481836
OTG26296.1	1	1	9.06	0.769101	1.42611	Low	High	OTG26296.1 putative formin, FH2 domain-containing protein [Helianthus annuus]	40090.9	58257.4	56795.4	57780.2	60020.9	51292.7	96263.7	30184	94804	51714.5	56364.6	73750.6	0.917501	0.701208	0.764259	-0.124219	-0.512085	-0.387866
KVH90502.1	1	1	8.32	0.578448	1.34343	Medium	Low	KVH90502.1 HECT-like protein [Cynara cardunculus var. scolymus]	15817.8	14329.4	13589.8	18706.9	19655.3	9302.88	16032.9	5121.9	14325.3	14579	15888.3	11826.7	0.917592	1.23272	1.34343	-0.124075	0.301843	0.425918
OTG14599.1	1	1	15.8	0.406043	1.45723	Medium	Low	OTG14599.1 Protein of unknown function (DUF1000) [Helianthus annuus]	4362.08	3792.42	1952.41	3032.25	3766.9	4214.07	2469.44	1444.13	3644.09	3368.97	3671.07	2519.22	0.917706	1.33731	1.45723	-0.123896	0.41933	0.543226
KVI12509.1	1	1	10.87	0.132522	1.41745	Low	High	KVI12509.1 F-box domain, cyclin-like protein [Cynara cardunculus var. scolymus]	5281.09	4628.48	5943.48	6864.03	5994.22	4403.68	9086.98	7030.15	6353.74	5284.35	5753.97	7490.29	0.918383	0.705494	0.768191	-0.122832	-0.503295	-0.380463
KVI05644.1	8	2	151.53	0.417483	1.28027	Medium	Low	KVI05644.1 Alcohol dehydrogenase, C-terminal, partial [Cynara cardunculus var. scolymus]	363926	196552	245259	272112	316341	288650	197681	196412	291000	268579	292368	228364	0.918635	1.1761	1.28027	-0.122437	0.23401	0.356447
KVI06448.1	1	1	6.46	0.826572	1.30246	Low	High	KVI06448.1 putative DEAD/DEAH-box helicase [Cynara cardunculus var. scolymus]	31609.7	23230.2	58232.8	45094.3	59722.3	18248	43559.5	27935.7	75777.5	37690.9	41021.5	49090.9	0.918807	0.767777	0.835624	-0.122166	-0.38124	-0.259074
OTG32725.1	7	2	104.03	0.824587	1.16976	Medium	Low	OTG32725.1 putative small GTPase superfamily [Helianthus annuus]	7379.23	4503.36	9398.49	5693.43	11786.2	5676.58	7100.08	2190.99	10504.7	7093.69	7718.74	6598.58	0.919022	1.07503	1.16976	-0.121828	0.10438	0.226209
XP_021994123.1	2	2	46.21	0.726827	1.10993	Medium	Low	XP_021994123.1 20 kDa chaperonin, chloroplastic-like [Helianthus annuus]	22640.4	26894.2	31594.2	30048.5	29094.3	29127.5	20196.8	21690.4	37640.3	27042.9	29423.5	26509.2	0.919094	1.02013	1.10993	-0.121715	0.028759	0.150474
OTG35111.1	1	1	8.33	0.682928	1.40738	Medium	Low	OTG35111.1 putative zinc finger, RING/FYVE/PHD-type, Armadillo-type fold protein [Helianthus annuus]	32440.6	12387.4	27632.3	27091.2	37200	14527.9	29258.7	12092.8	14652.5	24153.5	26273	18668	0.919326	1.29384	1.40738	-0.121351	0.371662	0.493013
KVH93367.1	3	2	36.79	0.696684	1.15157	Medium	Low	KVH93367.1 Chaperone DnaK, partial [Cynara cardunculus var. scolymus]	10404.6	11423.9	12152.2	12878.7	14979.5	9102.51	12396.8	9005.58	10693.6	11326.9	12320.2	10698.6	0.91937	1.05872	1.15157	-0.121282	0.0823205	0.203602
KVH89807.1	1	1	6.49	0.884887	1.09557	Low	High	KVH89807.1 Agenet-like domain-containing protein [Cynara cardunculus var. scolymus]	3066.66	4884.05	3277.39	3802.4	4851.97	3557.12	4166.27	5318.48	2816.45	3742.7	4070.5	4100.4	0.91947	0.912764	0.992707	-0.121126	-0.131686	-0.0105598
OTG16978.1	4	1	73.68	0.129553	1.5501	Low	High	OTG16978.1 putative pectinesterase/pectinesterase inhibitor U1 [Helianthus annuus]	31784.7	52793.2	31177.6	32458.1	57394.7	36038.1	63678.6	62274.1	53479.5	38585.2	41963.6	59810.7	0.919491	0.645122	0.701607	-0.121092	-0.632357	-0.511265
OTF87089.1	7	7	119.03	0.284561	1.33462	Low	High	OTF87089.1 putative prohibitin, Band 7 domain protein [Helianthus annuus]	23918.3	29719.5	37821.8	36701.1	36756.2	25971.5	47190.7	42566.4	32306.5	30486.5	33142.9	40687.8	0.91985	0.749278	0.814566	-0.12053	-0.416426	-0.295897
KVI05446.1	1	1	6.09	0.25678	4.33834	Low	High	KVI05446.1 Nucleoporin, Nup133/Nup155-like, C-terminal, partial [Cynara cardunculus var. scolymus]	9104.13	19302.7	11002.4	10269.8	11193.7	21376.9	22817.2	134156	13996.9	13136.4	14280.1	56990.1	0.919906	0.230503	0.250572	-0.120441	-2.11714	-1.9967
KVH94777.1	1	1	7.94	0.0946973	1.83765	Low	High	KVH94777.1 Transcription elongation factor, TFIIS/CRSP70, N-terminal, sub-type [Cynara cardunculus var. scolymus]	13365	12795.5	9482.36	12321.4	16930.6	9469.04	26453.9	25274	13771.5	11881	12907	21833.1	0.920506	0.544173	0.591168	-0.119502	-0.877862	-0.758361
XP_022014934.1	1	1	9.95	0.550473	1.32984	Low	High	XP_022014934.1 uncharacterized protein LOC110914452 [Helianthus annuus]	51411.8	57945.3	44894.5	46717.3	53413.7	67429.7	54410.7	101111	49609.1	51417.2	55853.5	68376.9	0.920572	0.751968	0.816848	-0.119397	-0.411257	-0.29186
KVH95530.1	1	1	13.95	0.588647	1.24937	Low	High	KVH95530.1 Palmitoyl protein thioesterase [Cynara cardunculus var. scolymus]	19783.3	11260.5	33459.6	23255.9	27482.3	19326	27459.1	21530.1	31599.3	21501.1	23354.8	26862.8	0.920632	0.800404	0.869407	-0.119303	-0.3212	-0.201896
AGE89403.1	1	1	11.85	0.326372	1.69646	Low	High	AGE89403.1 cis-prenyltransferase CPT1 [Taraxacum brevicorniculatum]	13269	14384.8	10432.8	15322.6	19176.2	6809.48	31833.8	13816.8	18961.8	12695.5	13769.4	21537.4	0.922011	0.589464	0.639324	-0.117144	-0.762525	-0.645381
KVI01153.1	1	1	8.65	0.0517643	3.13672	Low	High	KVI01153.1 Pentatricopeptide repeat-containing protein [Cynara cardunculus var. scolymus]	58549.5	93115.6	76146.5	112070	43702.1	91304.8	180330	402969	131283	75937.2	82359	238194	0.922027	0.318804	0.345764	-0.11712	-1.64926	-1.53214
OTG30886.1	2	2	21.28	0.0431311	2.22031	Low	High	OTG30886.1 putative vacuolar proton ATPase A3 [Helianthus annuus]	2644.5	2797.93	3458.28	3318.75	3783.8	2549.14	7602.68	8499.57	3660.1	2966.9	3217.23	6587.45	0.922192	0.450387	0.488387	-0.116861	-1.15076	-1.0339
OTG23031.1	2	1	43.67	0.690274	1.25867	Medium	Low	OTG23031.1 putative histone H2A [Helianthus annuus]	6724.24	2811.7	6825.73	4856.64	7185.63	5698.34	6525.18	1310.51	6259.06	5453.89	5913.54	4698.25	0.922272	1.16084	1.25867	-0.116736	0.215163	0.331899
KVH90063.1	1	1	10.17	0.83777	1.17768	Medium	Low	KVH90063.1 Cation-transporting P-type ATPase [Cynara cardunculus var. scolymus]	42083	26040	40247.7	43149	49107.2	25185.5	32321.4	40606.5	26794.7	36123.6	39147.3	33240.9	0.922761	1.08672	1.17768	-0.11597	0.119982	0.235953
KVH96699.1	1	1	6.42	0.617003	1.26648	Low	High	KVH96699.1 3Fe-4S ferredoxin [Cynara cardunculus var. scolymus]	32031.2	33501	30661.5	36097.9	38534.8	29605.2	59114	30312.8	32400.3	32064.6	34746	40609	0.922828	0.789592	0.855622	-0.115866	-0.340821	-0.224955
KVH78207.1	1	1	16.95	0.889665	1.09858	Medium	Low	KVH78207.1 GRAM-like protein [Cynara cardunculus var. scolymus]	12059.5	7216.03	9817.95	10696.6	13172.7	7656.91	14202.2	6899.86	7595.21	9697.83	10508.7	9565.76	0.922836	1.01381	1.09858	-0.115854	0.0197821	0.135636
OTG12902.1	1	1	6.09	0.520772	1.67885	Low	High	OTG12902.1 putative ENTH/ANTH/VHS superfamily protein [Helianthus annuus]	12978.8	20233.8	22043.5	22524.2	19530.9	17786.5	17992.6	56158.1	18616.2	18418.7	19947.2	30922.3	0.923373	0.595644	0.645075	-0.115015	-0.747477	-0.632462
OTG12522.1	2	1	24.43	0.00426594	5.21286	Medium	Low	OTG12522.1 hypothetical protein HannXRQ_Chr10g0310541 [Helianthus annuus]	666977	548534	1.334e+06	750078	1.12159e+06	889412	132856	105999	290813	849837	920361	176556	0.923374	4.81342	5.21286	-0.115014	2.26706	2.38208
KVI04559.1	2	2	37.6	0.356604	1.69563	Low	High	KVI04559.1 Alcohol dehydrogenase, C-terminal [Cynara cardunculus var. scolymus]	19292.8	29250.1	17497.5	21862.6	33599.7	16055.6	53178.9	39454.2	19347.3	22013.5	23839.3	37326.8	0.923409	0.58975	0.638666	-0.114958	-0.761825	-0.646867
KVI00209.1	4	1	50.92	0.456599	1.42051	Low	High	KVI00209.1 Adenine nucleotide translocator 1 [Cynara cardunculus var. scolymus]	26410.9	12379.7	16374.7	17009	24367.4	18351.8	36742.2	24343.6	17277.1	18388.5	19909.4	26121	0.923606	0.703972	0.7622	-0.11465	-0.506409	-0.391759
OTG17029.1	3	1	43.82	0.925337	1.09265	Low	High	OTG17029.1 putative nucleophile aminohydrolase (Ntn hydrolases) superfamily protein [Helianthus annuus]	9176.52	9266.28	8444.96	11011.6	10853.2	7239.14	12092.7	6847.12	10439	8962.59	9701.3	9792.93	0.923854	0.91521	0.990643	-0.114263	-0.127826	-0.0135625
KVI03916.1	1	1	6.78	0.167013	2.41955	Medium	Low	KVI03916.1 KIP1-like protein [Cynara cardunculus var. scolymus]	29103.8	24500.6	26609.5	36854.9	32597.9	17351.8	23247.2	1661.84	10967.3	26738	28934.8	11958.8	0.924075	2.23584	2.41955	-0.113918	1.16082	1.27474
OTF97759.1	1	1	20.85	0.298159	1.58193	Medium	Low	OTF97759.1 putative superoxide dismutase [Cu-Zn] 2 [Helianthus annuus]	4742.38	4689.87	9773.56	6758.11	6838.44	7184.31	2580.18	2305.8	8250.39	6401.94	6926.95	4378.79	0.924207	1.46203	1.58193	-0.113712	0.547977	0.661688
OTG36786.1	1	1	7.74	0.0105365	4.07021	Low	High	OTG36786.1 putative tetratricopeptide repeat (TPR)-like superfamily protein [Helianthus annuus]	22395.8	19279.6	10099.4	25012.1	16391.8	14607.4	76159.3	96916.6	37658.8	17258.3	18670.4	70244.9	0.924364	0.245687	0.265791	-0.113467	-2.0251	-1.91164
OTG37223.1	3	2	36.2	0.697307	1.35397	Low	High	OTG37223.1 putative glucose-methanol-choline oxidoreductase, FAD/NAD(P)-binding domain protein [Helianthus annuus]	18541.4	18095.1	17879.6	12771.4	33699.1	12467.7	37234.7	20950	15628.1	18172	19646.1	24604.3	0.924969	0.738571	0.798482	-0.112523	-0.437191	-0.324668
KVH98134.1	5	1	93.42	0.264075	1.42073	Medium	Low	KVH98134.1 Translation elongation factor EF1B, beta/delta subunit, guanine nucleotide exchange [Cynara cardunculus var. scolymus]	13833.7	17140.8	22641.7	16853.2	20962	20145.6	14809	8346.27	17641.2	17872.1	19320.2	13598.8	0.925043	1.31424	1.42073	-0.112408	0.394223	0.506631
KVI05683.1	4	2	75.6	0.200733	1.55708	Medium	High	KVI05683.1 Aldolase-type TIM barrel [Cynara cardunculus var. scolymus]	56096.5	51951.1	52624.9	68452.1	72374.8	32860.5	67761.1	104749	77668.6	53557.5	57895.8	83393	0.925066	0.64223	0.694253	-0.112371	-0.638839	-0.526467
OTG18724.1	3	2	46.52	0.390879	1.91114	Medium	High	OTG18724.1 putative alcohol dehydrogenase superfamily, zinc-type [Helianthus annuus]	6700.15	11978	4591.12	12510.4	7844.07	4793.13	14545.6	23319.3	6605.98	7756.44	8382.52	14823.6	0.925311	0.523248	0.565484	-0.111989	-0.934432	-0.822443
OTG15736.1	2	2	20.01	0.0624351	2.54711	Low	High	OTG15736.1 putative PLC-like phosphodiesterases superfamily protein [Helianthus annuus]	25531.5	21465.6	23702	25493.9	29115.5	21788.7	47757.2	101756	30564.7	23566.4	25466	60026.1	0.925404	0.392602	0.424249	-0.111845	-1.34886	-1.23702
KVH93450.1	9	9	178.79	0.817401	1.30644	Medium	Low	KVH93450.1 hypothetical protein Ccrd_004505 [Cynara cardunculus var. scolymus]	54750.2	11547	47783.8	47650.3	52399.2	23054.2	39478.2	10416.4	44333.7	38027	41034.6	31409.4	0.926706	1.21069	1.30644	-0.109816	0.275827	0.385643
CBK51849.1	1	1	8.09	0.174607	2.526	Low	High	CBK51849.1 unnamed protein product [Helianthus annuus]	1783.26	1743.12	1195.48	3361.2	785.811	945.212	1997.88	6522.64	3406.89	1573.95	1697.41	3975.8	0.927269	0.395883	0.426935	-0.10894	-1.33685	-1.22791
XP_021988628.1	1	1	6.38	0.165235	1.71412	Medium	Low	XP_021988628.1 uncharacterized protein LOC110885251 [Helianthus annuus]	67552.6	47928.8	67024	69955.7	76104.4	50758.5	36720	18200.5	59901.5	60835.1	65606.2	38274	0.927277	1.58946	1.71412	-0.108927	0.66854	0.777467
OTG05583.1	3	1	38.64	0.428002	1.69195	Low	High	OTG05583.1 putative purple acid phosphatase [Helianthus annuus]	4610.3	13277.5	6709.66	6271.54	10678.1	9575.27	12248.6	22036.4	7332.67	8199.14	8841.64	13872.6	0.927332	0.591034	0.637348	-0.108841	-0.758688	-0.649847
XP_021997412.1	1	1	14.56	0.900181	1.0782	Medium	High	XP_021997412.1 uncharacterized protein LOC110894498 [Helianthus annuus]	3634.52	3494.57	5114.22	4201.07	4402.49	4597.22	6639.79	1861.7	4412.53	4081.11	4400.26	4304.67	0.927469	0.948064	1.02221	-0.108628	-0.0769429	0.0316855
KVI05310.1	2	1	20.7	0.784691	1.15567	Medium	Low	KVI05310.1 Galactose mutarotase-like domain-containing protein [Cynara cardunculus var. scolymus]	14219	9482.45	16909.4	14642.6	17762.9	11368.8	12840.3	6488.91	18548.8	13536.9	14591.5	12626	0.927729	1.07215	1.15567	-0.108224	0.100504	0.208729
KVH97193.1	2	1	20.19	0.164142	3.16792	Low	High	KVH97193.1 ATPase, F1 complex, delta/epsilon subunit, partial [Cynara cardunculus var. scolymus]	264.447	274.724	326.829	198.497	430.765	303.767	466.77	384.126	1892.53	288.667	311.009	914.474	0.928161	0.315664	0.340096	-0.107553	-1.66354	-1.55598
OTG09240.1	1	1	6.12	0.306531	1.36752	Medium	Low	OTG09240.1 putative threonine dehydratase biosynthetic protein [Helianthus annuus]	6685.85	7650.8	7655.64	7443.19	7326.46	8923.08	6319.5	3115.11	7890.72	7330.77	7897.58	5775.11	0.92823	1.26937	1.36752	-0.107446	0.344117	0.451562
KVH90336.1	1	1	14.46	0.939011	1.08971	Low	High	KVH90336.1 hypothetical protein Ccrd_007651 [Cynara cardunculus var. scolymus]	65066.8	44738.1	30348.4	44004.4	61272.5	45708.1	38564.1	87290.3	26872.5	46717.8	50328.3	50908.9	0.92826	0.917673	0.988595	-0.107399	-0.123948	-0.016549
OTF95532.1	2	2	28.88	0.965032	1.07725	Medium	High	OTF95532.1 putative aspartic peptidase A1 family [Helianthus annuus]	38785.7	31159.9	32038.5	32377.6	50420	27065.3	35444.3	29129.4	38458	33994.7	36621	34343.9	0.928286	0.989833	1.0663	-0.107359	-0.0147427	0.0926161
KVI09478.1	1	1	8.17	0.00145233	3.36695	Low	High	KVI09478.1 Acyl-CoA N-acyltransferase [Cynara cardunculus var. scolymus]	2047.47	2825.76	1517.39	2150.44	2223.52	2508.39	8006.86	5137.07	8372.99	2130.21	2294.12	7172.3	0.928552	0.297005	0.319858	-0.106946	-1.75144	-1.6445
XP_021980467.1	1	1	6.11	0.466103	1.36262	Low	High	XP_021980467.1 uncharacterized protein LOC110876609 [Helianthus annuus]	67796.6	63907.2	35909.6	37684.8	99588.6	43194.3	76040.7	77852.3	74501	55871.1	60155.9	76131.3	0.928773	0.733879	0.790159	-0.106602	-0.446387	-0.339785
OTG22772.1	7	4	92.87	0.971815	1.10003	Low	High	OTG22772.1 putative transaldolase/Fructose-6-phosphate aldolase, Aldolase-type TIM barrel [Helianthus annuus]	28500.2	33266	23103.2	39010.9	35550	16797.1	43162.3	21898	28299	28289.8	30452.7	31119.8	0.928977	0.909062	0.978563	-0.106285	-0.137549	-0.0312635
KVH92311.1	1	1	14.52	0.810787	1.14824	Medium	Low	KVH92311.1 V-ATPase proteolipid subunit [Cynara cardunculus var. scolymus]	11626.4	1392.9	15459.5	7019.65	8666.43	14964.2	8635.25	5845.1	12212.9	9492.92	10216.8	8897.74	0.929152	1.06689	1.14824	-0.106013	0.0934128	0.199426
KVH93249.1	6	1	84.69	0.135595	1.41686	Low	High	KVH93249.1 Nucleotide-binding, alpha-beta plait [Cynara cardunculus var. scolymus]	2227.92	3617.65	2387.92	2911.7	2559.74	3385.16	3263.2	4485.66	3916.87	2744.5	2952.2	3888.58	0.929646	0.705785	0.759198	-0.105247	-0.502699	-0.397451
OTG13881.1	1	1	9.57	0.910376	1.07533	Medium	High	OTG13881.1 putative toll/interleukin-1 receptor (TIR) domain-containing protein [Helianthus annuus]	15580.9	14920.7	26251.9	26112.6	18092.4	16823.5	23134.8	18457	15295.3	18917.8	20342.9	18962.4	0.92995	0.997652	1.0728	-0.104775	-0.00339133	0.101384
XP_022009158.1	5	1	54.89	0.914281	1.40609	Low	High	XP_022009158.1 hypersensitive-induced response protein 1-like isoform X1 [Helianthus annuus]	15486.2	15115.8	23813.3	15383.1	27083.5	16038.7	44317.7	22918.6	9276.32	18138.4	19501.8	25504.2	0.93009	0.711193	0.76465	-0.104558	-0.491687	-0.387129
KVI11103.1	2	2	52.05	0.838691	1.20802	Low	High	KVI11103.1 hypothetical protein Ccrd_010490 [Cynara cardunculus var. scolymus]	29236.2	44314.6	22102	30908.5	44342.4	27562.1	54662.8	37549.8	23337.7	31884.3	34271	38516.8	0.930358	0.827802	0.889767	-0.104143	-0.272643	-0.168501
KVH88983.1	1	1	12.21	0.3316	1.46681	Medium	Low	KVH88983.1 B-cell receptor-associated 31-like protein [Cynara cardunculus var. scolymus]	4093.95	4729.78	7142.96	5529.34	7403.28	4229.23	2790.57	2979.11	5930.42	5322.23	5720.62	3900.03	0.930359	1.36466	1.46681	-0.10414	0.448544	0.552685
OTG11680.1	2	2	17.63	0.561627	1.52883	Medium	High	OTG11680.1 putative mitotic checkpoint family protein [Helianthus annuus]	6370.28	2395.88	8068.91	9292.75	4851.1	3939.61	3237.24	1260.81	7330.25	5611.69	6027.82	3942.77	0.930965	1.42329	1.52883	-0.103201	0.509227	0.612428
KVH97814.1	3	2	43.49	0.857522	1.14596	Low	High	KVH97814.1 Nucleic acid-binding, OB-fold [Cynara cardunculus var. scolymus]	2998.39	3044.37	3884.3	2262.09	3243.49	5155.84	3027.62	4842.85	3505.51	3309.02	3553.81	3791.99	0.931119	0.872633	0.937188	-0.102963	-0.196553	-0.0935893
KVI06875.1	1	1	8.32	0.977731	1.09765	Low	High	KVI06875.1 Armadillo [Cynara cardunculus var. scolymus]	5457.59	6287.72	6369.8	4241.7	8504.36	6698.68	8419.01	7326.19	4138.79	6038.37	6481.58	6628	0.93162	0.911039	0.977909	-0.102187	-0.134415	-0.0322281
KVH88524.1	7	1	95.61	0.43536	1.37371	Low	High	KVH88524.1 Ran GTPase [Cynara cardunculus var. scolymus]	3034.34	3034.15	5990.08	3993.5	4169.23	4780.51	4266.7	7738.81	4559.52	4019.52	4314.41	5521.68	0.93165	0.727953	0.781359	-0.10214	-0.458082	-0.355942
KVI04304.1	2	1	13.79	0.771311	1.21934	Low	High	KVI04304.1 Zinc finger, C2H2 [Cynara cardunculus var. scolymus]	11459.9	15347.1	6669.99	12949.6	13799.5	9174.42	19149.9	12480.9	9189.19	11159	11974.5	13606.6	0.931898	0.820114	0.880047	-0.101756	-0.286103	-0.184348
KVI03300.1	6	2	82.22	0.0239729	2.22249	Low	High	KVI03300.1 KOW-like protein [Cynara cardunculus var. scolymus]	20052.3	26461.5	20212.8	33381.9	22843.6	15361.8	62149.4	48884.3	37265.3	22242.2	23862.4	49433	0.932101	0.449946	0.482723	-0.101442	-1.15218	-1.05073
KVH87869.1	1	1	11.12	0.0786191	2.10271	Medium	Low	KVH87869.1 SET domain-containing protein [Cynara cardunculus var. scolymus]	50657.3	21580	40832.3	27843	52342.7	41116.5	20392.6	14655.3	22640.6	37689.9	40434.1	19229.5	0.932132	1.96	2.10271	-0.101394	0.970854	1.07225
OTG21823.1	1	1	14.19	0.029604	2.34229	Low	High	OTG21823.1 putative CLP protease proteolytic subunit 2 [Helianthus annuus]	2306.37	3742.14	2902.37	2961.39	2581.73	4056	4237.14	7402.14	9326.28	2983.63	3199.71	6988.52	0.932468	0.426932	0.457852	-0.100873	-1.22792	-1.12705
OTG23679.1	1	1	7.11	0.659138	1.88862	Low	High	OTG23679.1 putative F-box domain-containing protein [Helianthus annuus]	12632	13276.1	12399.6	13135.2	18055	9888.13	7417.92	45123.8	19807.1	12769.3	13692.8	24116.3	0.932553	0.529487	0.567783	-0.100742	-0.917332	-0.81659
OTG36078.1	1	1	7.67	0.715651	1.1813	Medium	Low	OTG36078.1 putative dolichyl-diphosphooligosaccharide--protein glycosyltransferase subunit 3 [Helianthus annuus]	19811.9	21520.4	26393.2	26331.9	31616.3	14665	31061.3	4356.95	26050.9	22575.2	24204.4	20489.7	0.932689	1.10178	1.1813	-0.100532	0.139838	0.24037
OTG23783.1	4	3	37.02	0.0167512	2.20284	Low	High	OTG23783.1 putative glyoxalase I, Glyoxalase/Bleomycin resistance protein/Dihydroxybiphenyl dioxygenase [Helianthus annuus]	9892.71	12157.1	7827.99	12703	11721.1	7600.2	18180.1	29050.3	18585.6	9959.26	10674.8	21938.7	0.932973	0.453959	0.486573	-0.100092	-1.13937	-1.03927
OTG34158.1	2	1	16.43	0.713328	1.82894	Low	High	OTG34158.1 putative cellulose synthase [Helianthus annuus]	183018	257265	108714	251223	209864	126567	588615	93431.1	322034	182999	195885	334693	0.934218	0.546766	0.585266	-0.0981687	-0.871005	-0.772837
AAP72959.1	5	2	82.35	0.746406	1.09367	Medium	Low	AAP72959.1 pectin acetylesterase [Lactuca sativa]	50191.9	54298.5	51550	61855	60707.8	44437.3	55276	54123.9	43296.8	52013.5	55666.7	50898.9	0.934373	1.0219	1.09367	-0.0979301	0.0312511	0.129181
KVI11734.1	1	1	19.96	0.0876206	2.80762	Medium	Low	KVI11734.1 Peptidase S10, serine carboxypeptidase [Cynara cardunculus var. scolymus]	11959.5	6710.62	14290.1	9474.39	13164.5	12635.7	3373.72	933.55	8256.61	10986.7	11758.2	4187.96	0.934388	2.62341	2.80762	-0.097906	1.39144	1.48935
KVH99014.1	1	1	7.11	0.346989	1.56533	Low	High	KVH99014.1 Glycosyl transferase, family 29 [Cynara cardunculus var. scolymus]	164801	293567	187714	203472	321098	166866	327593	475053	208684	215361	230479	337110	0.934406	0.638844	0.68369	-0.0978781	-0.646464	-0.548586
XP_021984912.1	1	1	6.98	0.433456	1.42248	Low	High	XP_021984912.1 trichohyalin-like [Helianthus annuus]	7731.45	12682.8	7651.41	9160.9	11753.9	9104.28	12931.4	18676.9	8314.59	9355.22	10006.4	13307.6	0.934926	0.702996	0.751926	-0.0970752	-0.508412	-0.411337
KVH99686.1	2	2	18.47	0.125919	1.55637	Low	High	KVH99686.1 Armadillo-type fold [Cynara cardunculus var. scolymus]	10574.2	14484.4	11687.4	14457.3	13713.6	11131.1	26529.4	16178.4	14482.6	12248.7	13100.7	19063.5	0.934965	0.64252	0.687213	-0.0970162	-0.638188	-0.541171
OTF95251.1	1	1	6.53	0.522025	1.5791	Low	High	OTF95251.1 putative protein kinase-like domain, Zinc finger, RING/FYVE/PHD-type [Helianthus annuus]	14757.3	23826.4	30108	15594.8	39243.6	18623.8	32927.9	56015.1	19527.8	22897.2	24487.4	36156.9	0.935062	0.633273	0.677252	-0.0968659	-0.659101	-0.562235
KVH90966.1	2	1	16.41	0.841004	1.18963	Low	High	KVH90966.1 26S proteasome regulatory complex, non-ATPase subcomplex, Rpn2/Psmd1 subunit [Cynara cardunculus var. scolymus]	3435.34	4318.6	4966.91	5229.33	3963.49	4410.94	6801.9	3053.4	5277.85	4240.28	4534.59	5044.38	0.935098	0.840595	0.898938	-0.0968107	-0.250518	-0.153707
ADL16493.1	3	1	40.28	0.554793	1.45883	Medium	Low	ADL16493.1 allene oxide cyclase [Artemisia annua]	156451	92361.4	124360	109651	213353	75739.1	108953	44206.4	120171	124391	132915	91110.1	0.935872	1.36528	1.45883	-0.0956169	0.449199	0.544816
OTG32376.1	1	1	8.25	0.317537	2.81437	Low	High	OTG32376.1 putative monodehydroascorbate reductase 6 [Helianthus annuus]	3061.1	3585.86	3713.75	3422.08	4337.68	3308.72	3773.85	21208.8	4176.29	3453.57	3689.49	9719.63	0.936055	0.355319	0.379592	-0.0953346	-1.49281	-1.39748
KVI02683.1	1	1	11.18	0.547776	1.32883	Medium	Low	KVI02683.1 B3 DNA binding domain-containing protein, partial [Cynara cardunculus var. scolymus]	16751.8	6830.87	10445.1	11370.5	11738.1	13205	14126.9	4963.15	8237.43	11342.6	12104.5	9109.17	0.937053	1.24518	1.32883	-0.0937974	0.316358	0.410155
KVH97345.1	1	1	9.93	0.245767	1.5774	Low	High	KVH97345.1 Steroid receptor RNA activator-protein/coat protein complex II, Sec31 [Cynara cardunculus var. scolymus]	5359.93	6067.96	3388.04	5465.28	7320.55	3023.74	8898.77	5933.88	8537.96	4938.65	5269.85	7790.21	0.93715	0.633956	0.676472	-0.0936476	-0.657546	-0.563899
OTF96299.1	2	1	15.37	0.000382959	2.2041	Low	High	OTF96299.1 putative P-loop containing nucleoside triphosphate hydrolases superfamily protein [Helianthus annuus]	2947.88	3742.76	2507.87	3536.39	3044.72	3231.8	6770.04	6768.22	6736.2	3066.17	3270.97	6758.15	0.937388	0.453699	0.484004	-0.0932822	-1.14019	-1.04691
OTG17175.1	1	1	11.39	0.524257	1.52342	Medium	Low	OTG17175.1 putative cyclomaltodextrinase [Helianthus annuus]	15315	7072.18	19743.4	10386.4	21971.9	12573.4	15099.8	2053.35	12340.9	14043.5	14977.2	9831.34	0.937659	1.42845	1.52342	-0.0928654	0.514446	0.607311
KVI07289.1	11	4	213.62	0.984352	1.06639	Medium	High	KVI07289.1 Cupredoxin, partial [Cynara cardunculus var. scolymus]	66509.2	66877.3	60522.6	77993.6	81364.7	47424.3	96712.8	55100.2	52054.2	64636.4	68927.6	67955.7	0.937743	0.951154	1.0143	-0.0927349	-0.0722491	0.0204857
KVH98729.1	6	2	83.48	0.446752	1.25305	Low	High	KVH98729.1 Proteasome, beta-type subunit, conserved site-containing protein [Cynara cardunculus var. scolymus]	9711.7	14532.4	10659.8	11555.7	12345.4	13310.3	15108.3	17944.1	10683.8	11634.6	12403.8	14578.7	0.93799	0.798055	0.850815	-0.0923562	-0.32544	-0.233083
KVH91220.1	1	1	6.85	0.789738	1.28464	Low	High	KVH91220.1 Nucleotidyl transferase domain-containing protein [Cynara cardunculus var. scolymus]	1380.9	2192.21	2835.62	2553.11	3564.7	713.92	4132.13	1863.13	2237.65	2136.25	2277.24	2744.3	0.938085	0.778429	0.829806	-0.0922101	-0.361363	-0.269153
KVI00781.1	12	4	208.81	0.922952	1.06597	Medium	High	KVI00781.1 hypothetical protein Ccrd_020964 [Cynara cardunculus var. scolymus]	29938.8	22272	23199.6	26502.4	29198.5	24684.7	34241.6	16335.3	27789.4	25136.8	26795.2	26122.1	0.938109	0.962281	1.02577	-0.0921726	-0.0554691	0.0367035
KVI09962.1	2	2	13.12	0.98193	1.1606	Low	High	KVI09962.1 Mad3/BUB1 homology region 1 [Cynara cardunculus var. scolymus]	5888.73	5266.15	4486.14	4658.23	6111.47	5902.65	2311.75	8497.73	7343.56	5213.67	5557.45	6051.01	0.938141	0.86162	0.918433	-0.092123	-0.214876	-0.122754
XP_021974810.1	1	1	6	0.977655	1.25203	Low	High	XP_021974810.1 uncharacterized protein LOC110869915 [Helianthus annuus]	22776.9	8604.87	40879	23705.8	40917	12391.1	28142.2	4800.28	57530.4	24086.9	25671.3	30157.7	0.938282	0.7987	0.851237	-0.0919064	-0.324274	-0.232367
OTG30372.1	1	1	12.07	0.288897	1.35826	Medium	Low	OTG30372.1 hypothetical protein HannXRQ_Chr03g0063771 [Helianthus annuus]	153986	106044	164751	142023	189467	120946	137869	94069.7	101162	141594	150812	111033	0.938876	1.27524	1.35826	-0.090993	0.350765	0.441758
XP_022030516.1	1	1	7.45	0.457891	1.38109	Low	High	XP_022030516.1 uncharacterized protein LOC110931430 [Helianthus annuus]	15510.2	21095.9	24222.6	14191.7	30021.6	20555.9	30339.1	34588.7	19082.2	20276.3	21589.7	28003.3	0.939162	0.724066	0.770971	-0.0905546	-0.465806	-0.375252
KVH97677.1	8	2	102.64	0.607569	1.19093	Low	High	KVH97677.1 Alpha-D-phosphohexomutase, alpha/beta/alpha domain I [Cynara cardunculus var. scolymus]	10645.8	5986.64	8138.15	9450.38	8511.3	8390.85	12588.3	8567.54	8344.33	8256.86	8784.18	9833.38	0.939969	0.839677	0.893302	-0.0893146	-0.252094	-0.16278
OTG35118.1	1	1	7.84	0.76374	1.23204	Medium	Low	OTG35118.1 putative ubiquitin specific protease domain protein [Helianthus annuus]	313537	177368	216775	261692	339723	151285	253307	96415.1	261217	235893	250900	203646	0.940188	1.15835	1.23204	-0.0889784	0.212068	0.301047
KVH94018.1	2	1	24.13	0.0694739	2.14586	Medium	High	KVH94018.1 Glycosyl transferase, family 1 [Cynara cardunculus var. scolymus]	3275.84	2894.38	2313.67	5023.68	2376.02	1623.36	7764.49	4849.89	5590.86	2827.97	3007.69	6068.41	0.940246	0.466014	0.49563	-0.0888905	-1.10155	-1.01266
OTG27986.1	2	2	19.49	0.883267	1.20773	Low	High	OTG27986.1 putative calcium-dependent phosphotriesterase superfamily protein [Helianthus annuus]	8848.94	5235.74	10055.4	7113.73	10679.3	7878.67	10249.5	13673.2	5232.04	8046.7	8557.22	9718.22	0.94034	0.828001	0.880533	-0.0887456	-0.272296	-0.183551
CBD32196.1	5	1	77.79	0.0970114	4.87913	Low	High	CBD32196.1 unnamed protein product [Helianthus annuus]	1349.99	1137.55	1082.9	1026.91	947.941	1822.05	7411.99	8819.82	1188.84	1190.15	1265.63	5806.88	0.940357	0.204955	0.217954	-0.0887193	-2.28662	-2.1979
KVH92471.1	2	1	37.32	0.808174	1.34606	Low	High	KVH92471.1 Eukaryotic porin/Tom40 [Cynara cardunculus var. scolymus]	7720.42	8667.39	10986.7	7163.22	14012.1	7922.64	16276.2	14966.7	5604.81	9124.85	9699.34	12282.6	0.94077	0.74291	0.789683	-0.0880854	-0.42874	-0.340655
XP_021969974.1	2	1	16.06	0.0621347	2.12023	Low	High	XP_021969974.1 serine/threonine protein phosphatase 2A 55 kDa regulatory subunit B beta isoform-like [Helianthus annuus]	4739.83	3849.67	2668.96	3523.78	4885.19	3555.77	10130.9	9182.7	4557.01	3752.82	3988.25	7956.86	0.940971	0.471646	0.501234	-0.0877776	-1.08422	-0.996445
XP_021975539.1	1	1	6.59	0.986633	1.19756	Low	High	XP_021975539.1 protein FAR1-RELATED SEQUENCE 5-like [Helianthus annuus]	5289.1	4003.56	5448.4	5394.75	6943.87	3327.16	10350.7	3984.13	3318.45	4913.69	5221.92	5884.42	0.940973	0.835033	0.887415	-0.0877751	-0.260095	-0.17232
KVI11056.1	5	5	58.99	0.0445674	3.23316	Low	High	KVI11056.1 Ribosomal protein L3 [Cynara cardunculus var. scolymus]	5686.08	12708.2	6873.9	11678.9	9061.69	6104.33	24580.3	43827.4	13288.2	8422.71	8948.31	27232	0.941263	0.309295	0.328596	-0.0873302	-1.69295	-1.60562
OTF98562.1	1	1	6.15	0.863228	1.18926	Low	High	OTF98562.1 putative transducin/WD40 repeat-like superfamily protein [Helianthus annuus]	31478.4	39334.9	27220.7	24238.8	55375.1	24534.3	33556.1	55924	27108.4	32678	34716.1	38862.8	0.941294	0.840856	0.893298	-0.0872831	-0.25007	-0.162787
OTG21655.1	3	2	35.95	0.687772	1.32815	Low	High	OTG21655.1 putative pectin methylesterase [Helianthus annuus]	93439.2	125331	79763.6	73656.7	191072	52346.4	166718	151117	78664.2	99511.3	105692	132166	0.941525	0.752924	0.799686	-0.0869286	-0.409423	-0.322495
OTF94728.1	1	1	9.24	0.0103285	7.35215	Low	High	OTF94728.1 putative GPI transamidase component family protein / Gaa1-like family protein [Helianthus annuus]	4073.68	4658.35	2732.01	6096.95	4209.53	1868.83	31149.7	42620.6	10515.1	3821.35	4058.44	28095.1	0.941581	0.136015	0.144453	-0.0868427	-2.87817	-2.79132
KVH91478.1	1	1	7.5	0.511584	1.27468	Medium	Low	KVH91478.1 Sodium/solute symporter [Cynara cardunculus var. scolymus]	12839.9	10346.7	7975.08	12680.8	12317	8086.42	6119.16	9109.91	10725.9	10387.2	11028.1	8651.66	0.941888	1.2006	1.27468	-0.0863733	0.263759	0.350132
KVH89295.1	5	5	79.97	0.994904	1.06102	Medium	High	KVH89295.1 hypothetical protein Ccrd_008720 [Cynara cardunculus var. scolymus]	96214.5	82020.3	70374.6	71196.4	129221	63362.2	100461	66161.2	82326	82869.8	87926.5	82982.7	0.94249	0.998639	1.05958	-0.085451	-0.00196475	0.0834862
OTG37206.1	1	1	8.07	0.0301773	1.88959	Low	High	OTG37206.1 putative alcohol dehydrogenase superfamily, zinc-type [Helianthus annuus]	11880.4	10994.7	11578.1	12066.5	9831.34	14655	16894.7	30555.8	17652.1	11484.4	12184.3	21700.9	0.942559	0.529215	0.561466	-0.0853451	-0.918075	-0.832729
KVH95118.1	4	4	68.68	0.949022	1.12559	Low	High	KVH95118.1 hypothetical protein Ccrd_002812, partial [Cynara cardunculus var. scolymus]	68621.4	40558.1	46682.9	66874.5	60386.6	38082	105508	17970.7	51959.5	51954.2	55114.4	58479.3	0.942661	0.88842	0.942459	-0.0851892	-0.170687	-0.0854978
OTG04455.1	1	1	9.63	0.939453	1.1487	Medium	Low	OTG04455.1 putative concanavalin A-like lectin/glucanase domain, Xyloglucan endotransglucosylase/hydrolase [Helianthus annuus]	3952.88	2383.49	4748.43	3300.9	2475.75	5981.17	4795.1	2843.38	2597.29	3694.93	3919.27	3411.93	0.94276	1.08295	1.1487	-0.085038	0.114962	0.2
OTG37534.1	1	1	8.99	0.497467	1.43089	Low	High	OTG37534.1 hypothetical protein HannXRQ_Chr01g0019831 [Helianthus annuus]	42472.7	63218.2	34743.7	45029.8	52993.1	50901.4	73529.6	90444.3	36971.9	46811.5	49641.5	66981.9	0.942992	0.698868	0.741117	-0.0846823	-0.516908	-0.432226
KVH88572.1	1	1	6.94	0.3748	2.67612	Low	High	KVH88572.1 B3 DNA binding domain-containing protein, partial [Cynara cardunculus var. scolymus]	2240.38	1774.47	690.047	2127.66	935.394	1925.83	2825.89	8474.37	1290.62	1568.3	1662.96	4196.96	0.943076	0.373675	0.39623	-0.0845538	-1.42014	-1.33559
OTG19140.1	1	1	15.89	0.844774	1.15778	Low	High	OTG19140.1 putative mlo-related protein [Helianthus annuus]	216804	124314	141088	159882	237345	113991	198275	229244	130770	160735	170406	186096	0.943249	0.863722	0.915688	-0.0842888	-0.211361	-0.127072
KVH99995.1	1	1	6.87	0.840963	1.09397	Low	High	KVH99995.1 Chaperone, tailless complex polypeptide 1 [Cynara cardunculus var. scolymus]	14187.3	13990.5	9792.12	11151.6	16827.7	12261.7	13773	11683.2	16081.8	12656.7	13413.7	13846	0.943563	0.914102	0.968777	-0.0838086	-0.129573	-0.045764
KVH98781.1	2	2	19.62	0.958605	1.07067	Medium	Low	KVH98781.1 Inositol-tetrakisphosphate 1-kinase [Cynara cardunculus var. scolymus]	31310.9	23801.2	21832.4	31476.8	32516.1	17455	30310.6	15538.3	30223.3	25648.2	27149.3	25357.4	0.944708	1.01147	1.07067	-0.08206	0.0164487	0.0985087
KVH96391.1	1	1	8.96	0.0686952	1.77278	Low	High	KVH96391.1 5'-3' exoribonuclease [Cynara cardunculus var. scolymus]	3352.28	2779.53	2913.68	4029.77	3175.71	2368.06	6793.96	5668.65	3573.06	3015.17	3191.18	5345.22	0.944843	0.564086	0.597016	-0.0818529	-0.826012	-0.744159
AAB61302.1	1	1	17.68	0.882696	1.25707	Low	High	AAB61302.1 chloroplastic glutamine synthetase, partial [Helianthus annuus]	4552.63	4872.72	2595.9	4659.7	4582.39	3474.22	6113.12	6673.08	2325.38	4007.08	4238.77	5037.19	0.94534	0.795499	0.841495	-0.0810945	-0.330067	-0.248973
XP_022014810.1	1	1	10.08	0.89062	1.29244	Low	High	XP_022014810.1 muscle M-line assembly protein unc-89-like [Helianthus annuus]	51338.7	66558.8	71525.8	57740.7	72262.1	70333.2	37168.3	126032	81618.3	63141.1	66778.7	81606	0.945528	0.773731	0.818306	-0.0808082	-0.370096	-0.289288
XP_021975266.1	1	1	11.38	0.085298	1.9443	Low	High	XP_021975266.1 uncharacterized protein LOC110870390 [Helianthus annuus]	86568.5	89736.8	50342.4	93065.2	77632.9	68983.5	205533	143378	91759	75549.3	79893.9	146890	0.94562	0.514325	0.543902	-0.0806674	-0.959247	-0.87858
XP_022042229.1	1	1	7.61	0.95964	1.09674	Low	High	XP_022042229.1 uncharacterized protein LOC110944891 [Helianthus annuus]	8731.49	12915.1	10737.4	5908.75	17594.6	10722.2	9450.91	16964.8	9101.05	10794.7	11408.5	11838.9	0.946197	0.911795	0.963642	-0.0797878	-0.133218	-0.0534304
OTG16261.1	2	1	27.12	0.279732	1.87617	Low	High	OTG16261.1 putative cysteine synthase D1 [Helianthus annuus]	12337.6	13250.3	12691.2	11336.9	20317.7	8800.92	22916	37228	11674.1	12759.7	13485.2	23939.4	0.946202	0.533	0.563305	-0.0797796	-0.907792	-0.828012
OTF91669.1	1	1	8.13	0.0369902	2.38802	Medium	Low	OTF91669.1 putative DEAD box RNA helicase (RH3) [Helianthus annuus]	6132.55	4911.93	8173.55	5434.17	6507.81	8360.59	2863.32	1403.97	4234.53	6406.01	6767.52	2833.94	0.946582	2.26046	2.38802	-0.0792007	1.17662	1.25582
KVH92433.1	1	1	9.81	0.180861	2.26438	Low	High	KVH92433.1 Methyltransferase domain-containing protein [Cynara cardunculus var. scolymus]	6750.06	7470.68	4495.8	8395.57	6458.35	4911.27	11998	24028	6355.29	6238.84	6588.4	14127.1	0.946944	0.441623	0.466366	-0.0786484	-1.17911	-1.10047
KVH97147.1	1	1	6.57	0.469448	1.3818	Low	High	KVH97147.1 Vacuolar protein sorting-associated protein 62 [Cynara cardunculus var. scolymus]	2753.83	4746.84	3852.36	5671.02	3417.51	2898.83	6235.18	6006.1	3446.35	3784.34	3995.79	5229.21	0.947084	0.723693	0.764128	-0.0784361	-0.46655	-0.388114
OTG12453.1	1	1	7.52	0.951764	1.09373	Low	High	OTG12453.1 putative 28S rRNA (cytosine-C(5))-methyltransferase [Helianthus annuus]	42220.8	46729.3	71125.8	53206.5	88706.7	27038.2	61783.9	37871.7	75424	53358.6	56317.1	58359.9	0.947467	0.914304	0.964998	-0.0778522	-0.129255	-0.0514025
OTF93165.1	7	1	84.46	0.788945	1.22133	Low	High	OTF93165.1 putative phosphoglucomutase/phosphomannomutase family protein [Helianthus annuus]	11478.4	17258.6	8896.79	19079	9614.53	10998.7	17934.3	9563.02	18465.8	12544.6	13230.8	15321.1	0.948138	0.818781	0.863568	-0.0768312	-0.28845	-0.211619
KVF53876.1	1	1	7.8	0.55149	1.4679	Low	High	KVF53876.1 hypothetical protein Ccrd_026749 [Cynara cardunculus var. scolymus]	7067.73	6194.98	2559.21	9726.6	3977.35	2979.02	10884.7	5260.31	7080.07	5273.97	5560.99	7741.68	0.948387	0.681244	0.718318	-0.076452	-0.553757	-0.477305
KVH98147.1	7	4	83.73	0.605015	1.27134	Low	High	KVH98147.1 Iron/zinc purple acid phosphatase-like C-terminal domain-containing protein [Cynara cardunculus var. scolymus]	6929.84	21839.8	11177.3	12256.2	12980	16881.8	16901.9	21498	12386.5	13315.7	14039.3	16928.8	0.948456	0.786569	0.829315	-0.0763476	-0.346355	-0.270008
KVI06401.1	1	1	6.3	0.958255	1.26081	Low	High	KVI06401.1 Concanavalin A-like lectin/glucanase, subgroup [Cynara cardunculus var. scolymus]	10452.6	14199.2	13502.6	20414.1	9278.73	10530.4	10668.4	28806	8631.1	12718.1	13407.8	16035.2	0.948566	0.79314	0.836147	-0.0761805	-0.334353	-0.258172
OTG20973.1	1	1	10.59	0.770623	1.3722	Medium	Low	OTG20973.1 putative sieve element occlusion [Helianthus annuus]	335734	74591.8	202793	200330	338146	107552	205731	39672.7	225394	204373	215343	156933	0.949059	1.3023	1.3722	-0.0754311	0.381058	0.456489
OTG07262.1	1	1	8.49	0.0284042	1.67918	Low	High	OTG07262.1 putative ATPase, AAA-type, core [Helianthus annuus]	4867.9	5197.61	6335.5	5700.9	6979.04	4581.52	9304.98	10961.3	7274.01	5467	5753.82	9180.09	0.950152	0.595528	0.626771	-0.07377	-0.747759	-0.673989
OTG21930.1	2	1	54.59	0.921201	1.097	Low	High	OTG21930.1 putative glucose/ribitol dehydrogenase [Helianthus annuus]	8468.77	14324.7	7755.39	11686.4	12448.3	8006.9	13584.9	12513.3	7413.85	10183	10713.9	11170.7	0.950447	0.911581	0.959108	-0.0733221	-0.133557	-0.0602349
OTG04192.1	5	5	89.93	0.791949	1.14348	Low	High	OTG04192.1 putative peroxiredoxin IIF [Helianthus annuus]	30493.5	37244	34822.7	30327.9	44383.6	33187.8	41975.5	47196.7	28103	34186.7	35966.4	39091.7	0.950518	0.874526	0.920052	-0.0732142	-0.193427	-0.120213
KVI10474.1	14	2	185.33	0.845299	1.18963	Low	High	KVI10474.1 14-3-3 domain-containing protein [Cynara cardunculus var. scolymus]	31636.7	24292.6	23009.2	26908.8	40033.5	16074.5	43997.7	21930	27980.3	26312.8	27672.3	31302.7	0.950874	0.840594	0.884023	-0.0726735	-0.250518	-0.177845
XP_022003614.1	1	1	6.32	0.504463	1.95626	Low	High	XP_022003614.1 uncharacterized protein LOC110901069 [Helianthus annuus]	4521.07	21617.3	5099.99	10142.3	7109.07	15593.3	21130.2	33526.3	6453.78	10412.8	10948.2	20370.1	0.951094	0.51118	0.537465	-0.0723397	-0.968096	-0.895756
ABH11433.2	4	1	58.47	0.885883	1.13671	Low	High	ABH11433.2 Mn-superoxide dismutase I [Helianthus annuus]	15302.8	15307.6	13615.8	16464.6	16318.5	13707.9	23649.5	11898.7	14724.1	14742.1	15497	16757.4	0.951286	0.879733	0.924783	-0.072049	-0.184863	-0.112814
OTG05333.1	3	1	50.12	0.692879	1.17208	Low	High	OTG05333.1 putative proteasome subunit beta type-5 [Helianthus annuus]	58665.5	64619.4	46755.2	65444	68283.1	44981	83734.3	52378.5	63188.4	56680.1	59569.4	66433.8	0.951496	0.853182	0.896674	-0.0717302	-0.229075	-0.157345
KVI04040.1	2	1	17.98	0.356755	1.69439	Low	High	KVI04040.1 ATPase, V1 complex, subunit D [Cynara cardunculus var. scolymus]	6821	8687.49	8478	12358.3	9388.46	3456.51	16573.9	7764.81	16303.9	7995.5	8401.07	13547.5	0.951723	0.590182	0.620119	-0.071386	-0.760769	-0.689383
KVI00190.1	1	1	11.7	0.869102	1.18247	Medium	Low	KVI00190.1 Chromo domain/shadow, partial [Cynara cardunculus var. scolymus]	9420.14	19011.9	15433.8	23315.7	14458.6	8308.47	12938.2	6094.98	19938.3	14622	15360.9	12990.5	0.951894	1.12559	1.18247	-0.0711272	0.170679	0.241806
XP_022032476.1	1	1	9.41	0.0810458	2.63367	Medium	Low	XP_022032476.1 uncharacterized protein LOC110933568 [Helianthus annuus]	106855	84720.5	233146	131199	218672	95409.2	48090.3	33999.3	86982.7	141574	148427	56357.4	0.953828	2.51207	2.63367	-0.0681996	1.32887	1.39707
OTF90272.1	1	1	12.8	0.241175	1.9625	Medium	Low	OTF90272.1 putative hepatitis C virus non-structural protein NS4a [Helianthus annuus]	4640.34	3866.69	7485.79	5184.74	8119.81	3461.99	1494.76	331.703	6717.02	5330.94	5588.85	2847.83	0.953853	1.87193	1.9625	-0.0681604	0.904529	0.972689
OTF87113.1	1	1	7.2	0.148939	1.8274	Medium	Low	OTF87113.1 hypothetical protein HannXRQ_Chr17g0558221 [Helianthus annuus]	96655.2	119668	77842.4	150117	66818	91303.8	47156.3	34650.2	86869.6	98055.3	102746	56225.4	0.954344	1.74397	1.8274	-0.0674193	0.802374	0.869794
OTG16298.1	1	1	7.85	0.433896	1.64333	Low	High	OTG16298.1 putative histone deacetylase 15 [Helianthus annuus]	1.55573e+06	2.71542e+06	968526	2.49646e+06	1.30983e+06	1.68293e+06	3.52932e+06	3.65715e+06	1.42405e+06	1.74656e+06	1.82974e+06	2.87017e+06	0.954539	0.60852	0.637502	-0.0671234	-0.716623	-0.649499
OTG23368.1	1	1	8.26	0.147664	4.88885	Medium	Low	OTG23368.1 putative FAR1 DNA binding domain, MULE transposase domain, FHY3/FAR1 family [Helianthus annuus]	3643.9	322.979	5338.6	2633.63	3121.07	3992.77	1504.86	225.261	263.698	3101.83	3249.15	664.605	0.954656	4.66717	4.88885	-0.0669471	2.22255	2.28949
KVI02740.1	2	1	35.61	0.225938	2.12851	Low	High	KVI02740.1 hypothetical protein Ccrd_018972 [Cynara cardunculus var. scolymus]	4844.71	5528.65	2596.56	5470.58	4450.74	3660.82	12753.4	11063.1	3790.1	4323.3	4527.38	9202.19	0.954925	0.469813	0.491989	-0.0665413	-1.08984	-1.0233
KVH88241.1	3	3	28.93	0.0303062	1.77398	Low	High	KVH88241.1 Leucine-rich repeat-containing protein [Cynara cardunculus var. scolymus]	8710.97	9264.71	5880.76	9002.43	9087.22	6879.75	15933.2	10687.1	15700.6	7952.15	8323.14	14107	0.955426	0.563703	0.590001	-0.0657832	-0.826993	-0.76121
OTG22948.1	1	1	6.06	0.656147	1.34449	Medium	Low	OTG22948.1 putative protein of unknown function DUF247, plant [Helianthus annuus]	165929	137140	291784	126518	289286	206736	163556	98252.8	201222	198284	207513	154344	0.955526	1.28469	1.34449	-0.0656337	0.361425	0.427059
KVI04953.1	1	1	9.07	0.0617342	2.60892	Low	High	KVI04953.1 Acyl transferase/acyl hydrolase/lysophospholipase [Cynara cardunculus var. scolymus]	3061.96	3178.12	2470.63	3291.68	1737.44	4064.84	3708.73	9790.87	9225.95	2903.57	3031.32	7575.18	0.957857	0.3833	0.400164	-0.0621183	-1.38345	-1.32134
KVH94596.1	5	5	70.27	0.246298	1.57129	Low	High	KVH94596.1 Ribosomal protein S8, partial [Cynara cardunculus var. scolymus]	24649.2	32047.8	21466	24129	37423.5	20026.6	52910.3	44157.5	25749.3	26054.3	27193.1	40939	0.958124	0.636418	0.664234	-0.0617153	-0.651953	-0.590237
KVI10087.1	3	1	28.11	0.0187634	3.83843	Low	High	KVI10087.1 Concanavalin A-like lectin/glucanase superfamily [Cynara cardunculus var. scolymus]	3940.36	4661.4	3556.84	4146.6	5750.85	2792.11	9275.72	9729.45	27664.8	4052.87	4229.85	15556.7	0.958158	0.260523	0.2719	-0.0616651	-1.94052	-1.87885
OTG23039.1	1	1	6.37	0.974728	1.04778	Medium	Low	OTG23039.1 hypothetical protein HannXRQ_Chr06g0177991 [Helianthus annuus]	19888.6	11760.4	16177.3	17608.9	20247.7	12038.3	12854.8	16118.2	18646.4	15942.1	16631.6	15873.2	0.958539	1.00434	1.04778	-0.0610904	0.0062508	0.0673412
KVI03225.1	1	1	10.09	0.377098	1.77744	Medium	Low	KVI03225.1 hypothetical protein Ccrd_018484 [Cynara cardunculus var. scolymus]	11078.7	10507.1	4643.03	4557.24	13123.5	9681.82	6406.77	2717.82	6269.75	8742.94	9120.86	5131.45	0.958565	1.7038	1.77744	-0.0610513	0.768752	0.829803
OTG18189.1	1	1	7.48	0.544454	1.62059	Low	High	OTG18189.1 hypothetical protein HannXRQ_Chr08g0220381 [Helianthus annuus]	401129	346453	342912	404594	320114	411942	409355	1.05556e+06	302320	363498	378883	589080	0.959392	0.617061	0.643179	-0.059807	-0.696516	-0.636709
XP_022010069.1	7	2	69.01	0.0152908	2.76594	Low	High	XP_022010069.1 60S ribosomal protein L4-like [Helianthus annuus]	3018.54	3849.99	3177.27	4714.46	3387.85	2363.35	9598.47	12604.5	5583.08	3348.6	3488.55	9262.02	0.959882	0.361541	0.376651	-0.0590717	-1.46777	-1.4087
XP_021974907.1	8	7	107.89	0.839925	1.0868	Low	High	XP_021974907.1 CBS domain-containing protein CBSX3, mitochondrial-like [Helianthus annuus]	56930.9	56978.6	56241.2	44857.5	73233.3	59150.7	56488.8	71711.6	56719	56716.9	59080.5	61639.8	0.959994	0.920134	0.958479	-0.0589029	-0.120084	-0.0611809
OTG12009.1	1	1	8	0.314122	1.83411	Low	High	OTG12009.1 putative sec14p-like phosphatidylinositol transfer family protein [Helianthus annuus]	10140	8645.78	8862.05	10323.9	6510.34	11940.8	25701.1	7545.75	17462.3	9215.95	9591.69	16903.1	0.960826	0.545224	0.567453	-0.0576529	-0.87508	-0.817427
OTF87236.1	1	1	12	0.790626	1.19915	Low	High	OTF87236.1 hypothetical protein HannXRQ_Chr17g0559541 [Helianthus annuus]	1.21481e+06	696745	767971	870500	1.30211e+06	615291	1.14253e+06	1.35821e+06	712408	893176	929300	1.07105e+06	0.961128	0.833927	0.867654	-0.0571998	-0.262007	-0.204807
OTG37913.1	1	1	9.06	0.3391	1.3248	Low	High	OTG37913.1 putative FAR1 DNA binding domain, FHY3/FAR1 family [Helianthus annuus]	11582.1	9625.88	9102.4	9977.82	9860.98	11690.9	15293.7	15919.8	8941.63	10103.5	10509.9	13385	0.961327	0.754832	0.785198	-0.0569006	-0.405772	-0.348871
OTG09386.1	1	1	7.65	0.17164	1.41759	Medium	Low	OTG09386.1 putative ribosomal protein L2, Ribosomal protein L25/L23 [Helianthus annuus]	32196.8	24586.7	25764	30847.5	34645.5	20335.3	21077.4	23135.7	16332.1	27515.8	28609.4	20181.7	0.961773	1.3634	1.41759	-0.0562311	0.447211	0.503442
KVI06548.1	8	2	111.21	0.445045	1.31375	Low	High	KVI06548.1 Proteasome, alpha-subunit, N-terminal domain-containing protein [Cynara cardunculus var. scolymus]	11472.7	18722.4	10142.7	14485.7	14002.7	13405.8	15404.4	24117.4	13472.2	13446	13964.8	17664.7	0.962851	0.761179	0.790547	-0.0546163	-0.393692	-0.339076
KVI12267.1	1	1	9.61	0.939107	1.06499	Low	High	KVI12267.1 cytochrome b561, eukaryote [Cynara cardunculus var. scolymus]	6130.62	2469.7	12107.4	8928.54	8672.9	3883.37	6302.46	3832.52	11918.6	6902.58	7161.6	7351.19	0.963832	0.938975	0.97421	-0.0531469	-0.0908416	-0.0376947
KVI02368.1	2	2	19.18	0.490385	1.31712	Low	High	KVI02368.1 BolA protein [Cynara cardunculus var. scolymus]	11583.5	11742.1	9187.27	12385.3	15324.5	6019.92	17412.6	11597.8	13813.1	10837.6	11243.2	14274.5	0.963924	0.75923	0.787645	-0.0530082	-0.39739	-0.344382
KVI01863.1	2	2	45.37	0.824318	1.23006	Low	High	KVI01863.1 Inorganic pyrophosphatase [Cynara cardunculus var. scolymus]	10349.3	10703.1	7360.63	17858.6	6131.46	5481.19	11112.2	6587.49	17250.1	9471	9823.75	11649.9	0.964093	0.812967	0.843246	-0.0527559	-0.298731	-0.245975
KVH95337.1	2	2	14.33	0.627264	1.4466	Low	High	KVH95337.1 Cation/H+ exchanger [Cynara cardunculus var. scolymus]	11712.2	25933.8	46918.3	22939.6	52847.9	11926.1	48277.4	51145.4	22907.7	28188.1	29237.9	40776.9	0.964097	0.691278	0.717021	-0.0527502	-0.532663	-0.479913
KVH89833.1	6	2	168.87	0.643639	1.33783	Low	High	KVH89833.1 hypothetical protein Ccrd_008172 [Cynara cardunculus var. scolymus]	428058	726054	433816	474375	628952	543402	577304	1.09642e+06	450649	529309	548910	708125	0.964292	0.74748	0.77516	-0.0524583	-0.419892	-0.367434
ACZ51444.1	4	1	125.32	0.643639	1.33783	Low	High	ACZ51444.1 Cu/Zn superoxide dismutase [Mikania micrantha]	30873.5	52366.3	31288.8	34214.1	45362.9	39192.6	41637.8	79078.9	32502.9	38176.2	39589.9	51073.2	0.964292	0.74748	0.77516	-0.0524583	-0.419892	-0.367434
KVI05872.1	1	1	8.85	0.879952	1.19989	Low	High	KVI05872.1 hypothetical protein Ccrd_015752 [Cynara cardunculus var. scolymus]	21954.9	12803.6	25315.7	20726.9	23786.1	17773.9	21216.3	14258.4	36607.5	20024.7	20762.3	24027.4	0.964474	0.833412	0.86411	-0.0521858	-0.262899	-0.210713
KVI07171.1	2	1	28.86	0.289299	1.49177	Low	High	KVI07171.1 Remorin, C-terminal [Cynara cardunculus var. scolymus]	7992.92	5995.75	5277.01	5999.81	8246.87	5717.18	12145.8	10766.6	5827.6	6421.89	6654.62	9580.01	0.965028	0.670343	0.694636	-0.0513574	-0.577029	-0.525671
KVH98451.1	1	1	8.11	0.919104	1.19047	Low	High	KVH98451.1 cytochrome P450 [Cynara cardunculus var. scolymus]	266464	162034	156743	104653	291075	210600	294267	117234	285212	195080	202109	232238	0.965221	0.840002	0.870269	-0.051069	-0.251536	-0.200467
KVH88514.1	7	2	99.87	0.984985	1.18373	Low	High	KVH88514.1 Cysteine synthase A [Cynara cardunculus var. scolymus]	45491.1	28927.5	28501.2	32354.6	43082.8	31108.5	69184.1	18898.9	33745.9	34306.6	35515.3	40609.7	0.965966	0.844789	0.874554	-0.0499562	-0.243337	-0.193381
KVH97047.1	1	1	8.24	0.612726	1.32569	Medium	Low	KVH97047.1 AP2/ERF domain-containing protein [Cynara cardunculus var. scolymus]	30634.1	17197.4	36145.5	27262.3	39550.4	20031.5	32977.4	10153.4	22377.8	27992.3	28948.1	21836.2	0.966984	1.28192	1.32569	-0.0484355	0.35831	0.406745
OTG17632.1	2	2	85.69	0.5263	1.57454	Low	High	OTG17632.1 putative germin-like protein subfamily 2 member 2 precursor [Helianthus annuus]	612219	561701	566138	663767	598466	535216	611509	1.61322e+06	515057	580019	599149	913264	0.968071	0.635106	0.656053	-0.0468148	-0.65493	-0.608115
XP_021980948.1	3	2	64.78	0.920005	1.13934	Low	High	XP_021980948.1 profilin-2-like [Helianthus annuus]	14040.2	12561.8	16357.8	13748.5	13917.6	16697.2	16963.5	28254.9	3727.47	14320	14787.8	16315.3	0.968365	0.877701	0.906374	-0.0463776	-0.188199	-0.141822
OTG08963.1	1	1	6.16	0.845246	1.39802	Low	High	OTG08963.1 hypothetical protein HannXRQ_Chr11g0347541 [Helianthus annuus]	29353.3	31470.1	21013.8	29011.9	30951.4	24455.8	55172.3	44906.1	14331.9	27279.1	28139.7	38136.8	0.969415	0.715295	0.737863	-0.0448142	-0.483389	-0.438575
KVH90218.1	1	1	15.7	0.0606719	2.55645	Low	High	KVH90218.1 Plastid lipid-associated protein/fibrillin conserved domain-containing protein [Cynara cardunculus var. scolymus]	2280.44	4325.66	2318.45	2983.15	3011.35	3211.16	7096.08	11917.9	3801.21	2974.85	3068.55	7605.06	0.969463	0.391167	0.403488	-0.0447421	-1.35414	-1.3094
OTF87158.1	1	1	11.97	0.0504659	1.56451	Medium	Low	OTF87158.1 putative concanavalin A-like lectin/glucanase domain, Serine/threonine-protein kinase Mps1 [Helianthus annuus]	54755.7	31551.9	51593.8	45699.7	52483.2	44054.5	31949.6	28406.2	30559.3	45967.1	47412.5	30305	0.969516	1.51681	1.56451	-0.0446641	0.601044	0.645708
KVI04109.1	2	1	16.95	0.980706	1.07449	Medium	Low	KVI04109.1 Calcium-binding EF-hand [Cynara cardunculus var. scolymus]	18796.6	8477.97	5726.9	17690.9	10743.2	5596.37	10964.3	4411.7	16295.2	11000.5	11343.5	10557.1	0.969766	1.042	1.07449	-0.0442914	0.0593567	0.103648
KVI12531.1	3	3	30.98	0.184723	1.59098	Low	High	KVI12531.1 Pectin lyase fold [Cynara cardunculus var. scolymus]	25763.7	35948.6	27073.3	23079.5	36204.2	32229.5	40090.6	68176.6	32988.6	29595.2	30504.4	47085.3	0.970194	0.628545	0.647854	-0.0436543	-0.669913	-0.626258
KVH89346.1	1	1	8.05	0.952863	1.07791	Low	High	KVH89346.1 hypothetical protein Ccrd_008667, partial [Cynara cardunculus var. scolymus]	6238.25	2612.81	3936.91	3115.98	7453.33	2609.54	7784.66	967.596	5032.03	4262.66	4392.95	4594.76	0.970339	0.927721	0.956079	-0.0434386	-0.108237	-0.0647988
AKZ24847.1	2	2	25.1	0.777765	1.48406	Low	High	AKZ24847.1 NADH dehydrogenase subunit 9 (mitochondrion) [Erigeron philadelphicus]	4197.96	4043.56	2690.58	2854.71	5131.82	3272.19	10101.5	3160.16	2962.25	3644.03	3752.91	5407.96	0.97099	0.673828	0.69396	-0.0424715	-0.569547	-0.527075
KVH94827.1	5	1	68.45	0.054503	1.73303	Low	High	KVH94827.1 KOW-like protein [Cynara cardunculus var. scolymus]	4415.92	4261.95	4840.24	6394.65	4642.96	2881.85	9212.45	7050.7	7164.21	4506.04	4639.82	7809.12	0.971166	0.577023	0.594155	-0.04221	-0.7933	-0.75109
OTF86084.1	1	1	8.48	0.982458	1.02941	Medium	High	OTF86084.1 putative formin, FH2 domain-containing protein [Helianthus annuus]	3282.43	4222.86	5495.59	3445.37	5613.39	4324.49	4170.05	4233.57	4602.22	4333.62	4461.08	4335.28	0.971429	0.999617	1.02902	-0.0418198	-0.000552638	0.0412672
OTG31296.1	1	1	6.45	0.485301	1.49421	Medium	Low	OTG31296.1 putative inner centromere protein, ARK-binding domain-containing protein [Helianthus annuus]	67548.3	44275.7	46970.4	30176.5	85681.9	47599.8	62220.3	6537.63	40636.2	52931.5	54486.1	36464.7	0.971468	1.45158	1.49421	-0.0417619	0.537624	0.579386
AID52921.1	6	1	114.42	0.72225	1.14726	Low	High	AID52921.1 tubulin alpha chain [Carthamus tinctorius]	31273.7	26106.2	22789.4	35078.4	16370.1	30968.1	31006.9	27841.8	33126.1	26723.1	27472.2	30658.3	0.972734	0.871646	0.896078	-0.0398827	-0.198186	-0.158304
KVH96787.1	1	1	7.18	0.417884	1.2964	Low	High	KVH96787.1 hypothetical protein Ccrd_001121 [Cynara cardunculus var. scolymus]	3856.59	2758.63	3915.71	4675.17	3543.99	2605.97	4268.97	3611.86	5771.43	3510.31	3608.38	4550.75	0.972822	0.771369	0.792919	-0.0397519	-0.374506	-0.334754
KVH97238.1	1	1	6.31	0.37297	1.33031	Medium	Low	KVH97238.1 G-protein beta WD-40 repeat-containing protein [Cynara cardunculus var. scolymus]	50481.6	39377.4	35027.9	39595.7	46923.4	41839.8	40513	16545.6	39429	41628.9	42786.3	32162.5	0.972951	1.29433	1.33031	-0.0395616	0.372205	0.411767
AAF29976.1	2	2	25.86	0.718549	1.35753	Medium	Low	AAF29976.1 isopentenyl pyrophosphate:dimethyllallyl pyrophosphate isomerase, partial [Lactuca sativa]	11437.5	12355.8	15850.7	12883.8	23032	4824.43	16371.1	4259.02	9380.44	13214.6	13580.1	10003.5	0.973091	1.321	1.35753	-0.0393537	0.401628	0.440982
OTF94422.1	1	1	8.03	0.828331	1.09017	Low	High	OTF94422.1 putative leucine-rich receptor-like protein kinase family protein [Helianthus annuus]	7308.38	5826.96	8448.65	6305.53	8395.43	7457.66	7708.78	9342.77	6478.69	7194.66	7386.21	7843.42	0.974068	0.917287	0.941708	-0.0379062	-0.124555	-0.0866487
OTF98523.1	2	1	18.75	0.555404	1.25108	Low	High	OTF98523.1 putative ARM repeat superfamily protein [Helianthus annuus]	10541.6	7750.73	8262.59	12709.9	7867.89	6676.48	12729.9	12521.7	7970.71	8851.62	9084.77	11074.1	0.974337	0.799308	0.820362	-0.0375078	-0.323176	-0.285668
KVH92735.1	2	1	15.47	0.112465	107.82	Low	High	KVH92735.1 ATP-grasp fold, partial [Cynara cardunculus var. scolymus]	5132.74	6148.14	3216.11	5349.83	5728.28	3796.79	11827.7	23406.1	1.52783e+06	4832.33	4958.3	521021	0.974595	0.00927474	0.00951651	-0.0371252	-6.75248	-6.71535
CBD31745.1	1	1	12.02	0.0497356	2.5619	Medium	Low	CBD31745.1 unnamed protein product [Helianthus annuus]	263459	488534	674399	398816	536802	526834	92486.1	251974	226387	475464	487484	190282	0.975343	2.49873	2.5619	-0.0360191	1.3212	1.35721
ADK97764.1	1	1	9.31	0.356325	1.33852	Low	High	ADK97764.1 chalcone isomerase, partial [Eclipta prostrata]	22711.3	17354.5	19673	20714.4	23816.5	16713.7	32021.7	17666.5	30273.2	19912.9	20414.9	26653.8	0.975413	0.747095	0.765927	-0.0359152	-0.420636	-0.384721
OTG24677.1	1	1	10.25	0.114114	2.14062	Low	High	OTG24677.1 putative AP2-like ethylene-responsive transcription factor [Helianthus annuus]	9501.45	13703.2	9722.08	9116.92	7449.34	17162.9	27577.6	30627	12278.9	10975.6	11243.1	23494.5	0.976208	0.467155	0.47854	-0.0347402	-1.09803	-1.06329
KVI08055.1	1	1	10.92	0.960917	1.34477	Low	High	KVI08055.1 hypothetical protein Ccrd_013588 [Cynara cardunculus var. scolymus]	1633.57	1291.83	5690.45	4239.23	1808.98	2772.47	2014.26	8603.9	968.177	2871.95	2940.23	3862.11	0.976779	0.743622	0.761301	-0.0338966	-0.427359	-0.393462
OTF84416.1	1	1	6.14	0.0791387	1.35382	Low	High	OTF84416.1 putative cytochrome c assembly protein [Helianthus annuus]	9155.12	8241.18	7526.45	8905.62	8573.23	8035.13	8848.61	11309.9	13582.5	8307.58	8504.66	11247	0.976828	0.73865	0.756173	-0.0338241	-0.437037	-0.403212
OTG31475.1	1	1	8.66	0.356958	1.48572	Low	High	OTG31475.1 putative F-box domain-containing protein [Helianthus annuus]	9130.37	6338.12	5123.8	10404.8	7525.17	3148.08	10314.7	11772.4	8507.39	6864.1	7026.01	10198.1	0.976955	0.673073	0.68895	-0.0336359	-0.571166	-0.53753
OTG27081.1	1	1	8.97	0.0115905	1.89045	Low	High	OTG27081.1 putative golgin candidate 5 [Helianthus annuus]	144581	108371	108061	152807	126058	90634.5	253836	235674	192966	120338	123166	227492	0.977032	0.528975	0.54141	-0.0335221	-0.91873	-0.885208
CAY07638.1	6	1	97.35	0.973763	1.03969	Medium	Low	CAY07638.1 unnamed protein product [Helianthus annuus]	20528.9	14955.9	25088.4	12281.1	33297.2	16401.1	22576	9536.74	27500.8	20191	20659.8	19871.2	0.97731	1.0161	1.03969	-0.0331117	0.0230375	0.0561492
OTG30307.1	2	2	21.41	0.562741	1.25208	Medium	Low	OTG30307.1 putative glucosamine/galactosamine-6-phosphate isomerase [Helianthus annuus]	6528.88	6357.11	5035.51	4523	7354.8	6453.48	7831.59	1995.62	4813.51	5973.83	6110.42	4880.24	0.977646	1.22409	1.25208	-0.0326155	0.291706	0.324322
KVI07372.1	1	1	8.67	0.990181	1.06086	Low	High	KVI07372.1 heme peroxidase, partial [Cynara cardunculus var. scolymus]	2348.87	3298.96	2170.93	3375.37	3022.4	1597.36	4809.22	1739.16	1746.21	2606.25	2665.05	2764.87	0.97794	0.942633	0.963897	-0.0321827	-0.0852319	-0.0530492
KVI09336.1	1	1	9.87	0.997797	1.02214	Medium	High	KVI09336.1 Ubiquitin [Cynara cardunculus var. scolymus]	4683.85	4760.17	7324.92	5170.09	8351.29	3618.78	6750.36	3485.29	6573.31	5589.65	5713.38	5602.99	0.978342	0.997619	1.0197	-0.0315888	-0.00343945	0.0281493
OTG27467.1	1	1	9.85	0.280429	2.16557	Low	High	OTG27467.1 putative IQ-domain 15 [Helianthus annuus]	91512.8	176874	76670.3	109981	190001	52451	288988	353535	104722	115019	117478	249081	0.979069	0.461773	0.471645	-0.0305182	-1.11475	-1.08423
KVI03588.1	7	4	102.03	0.999789	1.04317	Low	High	KVI03588.1 Ran GTPase [Cynara cardunculus var. scolymus]	8812.45	7417.48	8478.41	6953.15	11367.9	6914.42	11038.4	5292.07	9444.38	8236.11	8411.82	8591.63	0.979111	0.958621	0.979072	-0.0304551	-0.0609679	-0.0305128
KVI08222.1	1	1	10.13	0.336519	1.50168	Low	High	KVI08222.1 Peptidyl-prolyl cis-trans isomerase, FKBP-type [Cynara cardunculus var. scolymus]	11302	10367.2	9881.51	7833.29	13193.8	11194.8	18303.3	20185	8890.87	10516.9	10740.7	15793.1	0.97917	0.665921	0.680087	-0.0303682	-0.586577	-0.556209
KVH90212.1	3	3	24.2	0.599206	1.34469	Medium	Low	KVH90212.1 hypothetical protein Ccrd_007819 [Cynara cardunculus var. scolymus]	3556.07	2869.9	5528.05	2888.18	3102.54	6216.65	2625.4	2487.42	3965.41	3984.67	4069.12	3026.08	0.979246	1.31678	1.34469	-0.0302568	0.397013	0.42727
XP_022030693.1	1	1	8.63	0.885805	1.49025	Low	High	XP_022030693.1 uncharacterized protein LOC110931615 [Helianthus annuus]	491437	322326	493769	426864	597107	310658	1.15905e+06	209104	580398	435844	444876	649516	0.979698	0.671029	0.684935	-0.0295912	-0.575552	-0.545961
KVH98670.1	4	4	78.54	0.0760331	2.10456	Low	High	KVH98670.1 Ribosomal protein S2 [Cynara cardunculus var. scolymus]	37615.5	69834	34687.8	73888	45253	25933.6	108832	111977	78327.1	47379.1	48358.2	99712	0.979753	0.47516	0.484979	-0.0295093	-1.07352	-1.04401
KVI03743.1	1	1	8.2	0.135405	2.21791	Low	High	KVI03743.1 NAD-dependent epimerase/dehydratase [Cynara cardunculus var. scolymus]	11645.3	15100.2	10530.6	14648.7	12291.2	11086.8	28346.4	42395.6	11933.1	12425.4	12675.5	27558.4	0.980263	0.450875	0.459953	-0.0287594	-1.1492	-1.12044
KVI03044.1	9	1	111.89	0.916777	1.27612	Low	High	KVI03044.1 hypothetical protein Ccrd_018662 [Cynara cardunculus var. scolymus]	10094.9	12246.8	6869.43	11887.3	10364.8	7538.76	21777.9	8890.67	6608.43	9737.03	9930.31	12425.7	0.980537	0.783623	0.799178	-0.0283567	-0.351769	-0.323412
XP_021985460.1	1	1	6.49	0.182971	1.55857	Low	High	XP_021985460.1 uncharacterized protein LOC110881545 [Helianthus annuus]	4907.42	6134.31	5659.86	5543.16	7325.5	4159.62	8423.94	11801.2	5805.52	5567.2	5676.09	8676.89	0.980815	0.641612	0.654163	-0.0279478	-0.640226	-0.612279
KVI02359.1	6	6	119.19	0.000966007	3.83797	Low	High	KVI02359.1 Elongation factor G, III-V domain-containing protein [Cynara cardunculus var. scolymus]	33137.7	29051.8	21746.1	37255.7	30643.5	17629.7	99134.6	105821	117187	27978.5	28509.6	107381	0.981373	0.260554	0.2655	-0.0271272	-1.94035	-1.91322
OTG27735.1	2	2	24.57	0.98603	1.08536	Medium	Low	OTG27735.1 putative oryzain beta chain [Helianthus annuus]	2657.42	1767.48	3975.9	1786.25	2857.17	3916.14	1988.82	2969.24	2928.31	2800.27	2853.19	2628.79	0.981452	1.06523	1.08536	-0.02701	0.091164	0.118174
KVH88808.1	1	1	8.36	0.233208	2.32529	Low	High	KVH88808.1 Phosphoenolpyruvate carboxylase [Cynara cardunculus var. scolymus]	5738.81	7797.93	4091	6182.24	5497.08	6270.48	8019.61	26430.2	6539.68	5875.91	5983.26	13663.2	0.982058	0.430054	0.437912	-0.0261205	-1.21741	-1.19129
KVH90623.1	1	1	7.94	0.682167	1.15413	Medium	Low	KVH90623.1 CCR4-NOT complex, subunit 3/ 5 [Cynara cardunculus var. scolymus]	264183	141561	158385	185308	204021	184954	188596	36449.5	272545	188043	191428	165863	0.982319	1.13372	1.15413	-0.0257368	0.181066	0.206803
KVI09300.1	3	1	31.19	0.518484	1.33614	Medium	Low	KVI09300.1 Peptidase S10, serine carboxypeptidase [Cynara cardunculus var. scolymus]	3841.49	4160.6	6423.5	3333.99	6539.66	4799.15	3252.06	1845.9	5883.5	4808.53	4890.93	3660.49	0.983152	1.31363	1.33614	-0.0245138	0.39356	0.418074
XP_021975067.1	3	1	21.58	0.991598	1.28947	Low	High	XP_021975067.1 uncharacterized protein LOC110870171 [Helianthus annuus]	10442.2	27139.6	22511.7	30812.1	8846.14	21462.8	31763.7	39843.8	5881.2	20031.2	20373.7	25829.6	0.983189	0.775513	0.788773	-0.0244591	-0.366777	-0.342318
XP_022033138.1	1	1	9.27	0.502482	1.19121	Medium	Low	XP_022033138.1 uncharacterized protein LOC110934279 [Helianthus annuus]	26081.5	30433.7	26647.7	20093.4	29960.6	34404.2	24511.1	20894.5	25495.5	27720.9	28152.7	23633.7	0.984663	1.17294	1.19121	-0.0222983	0.23013	0.252428
KVH94026.1	1	1	6.78	0.602755	1.25753	Medium	Low	KVH94026.1 Protein of unknown function DUF3594 [Cynara cardunculus var. scolymus]	69755.1	34362.2	32964.8	53234.6	54162	31813.1	62686.9	4204.98	43809	45694	46403.2	36900.3	0.984717	1.23831	1.25753	-0.0222195	0.308374	0.330594
XP_022003742.1	2	2	13.57	0.93541	1.02027	Low	High	XP_022003742.1 glutathione S-transferase T3-like [Helianthus annuus]	6175.06	12067.2	9778.13	9247.63	10111.1	9064.01	9926.48	9899.37	8762.37	9340.11	9474.26	9529.41	0.985841	0.980136	0.994213	-0.0205729	-0.0289463	-0.0083734
OTG15903.1	3	1	43.37	0.767298	1.26881	Low	High	OTG15903.1 putative porin domain, Eukaryotic porin/Tom40 [Helianthus annuus]	9806.24	9634.95	13060.6	8115.92	16371.6	8478.59	17663.4	16200.7	7374.42	10833.9	10988.7	13746.2	0.985916	0.78814	0.799399	-0.0204637	-0.343475	-0.323012
KVH95585.1	1	1	16.26	0.618521	1.15534	Low	High	KVH95585.1 Aldo/keto reductase [Cynara cardunculus var. scolymus]	31311.8	30892.2	34098.7	33060.2	42567.9	22018.3	42950.2	33897.7	34414.4	32100.9	32548.8	37087.4	0.98624	0.865547	0.877624	-0.0199899	-0.208316	-0.188326
KVI05173.1	2	2	23.52	0.461899	1.33125	Low	High	KVI05173.1 Like-Sm (LSM) domain-containing protein [Cynara cardunculus var. scolymus]	12465.8	9187.5	12845.2	13159	14728.9	7081.91	20623.7	12405.5	12896.9	11499.5	11656.6	15308.7	0.986524	0.751176	0.761437	-0.0195735	-0.412778	-0.393204
KVH95720.1	4	1	57.93	0.674631	1.29753	Low	High	KVH95720.1 Aldolase-type TIM barrel [Cynara cardunculus var. scolymus]	22588.5	15428.3	13632	26321.2	17654.6	8305.96	28880.7	13882.7	24252.4	17216.3	17427.2	22338.6	0.987895	0.770696	0.78014	-0.017571	-0.375766	-0.358195
OTG29018.1	1	1	10.41	0.918742	1.11303	Medium	Low	OTG29018.1 hypothetical protein HannXRQ_Chr04g0117661 [Helianthus annuus]	55516.4	20061.6	41718.4	39536.5	32701.4	46471.6	40086	28186.1	38382.4	39098.8	39569.8	35551.5	0.988097	1.09978	1.11303	-0.0172757	0.137214	0.15449
KVI04611.1	1	1	11.2	0.0203638	1.94377	Low	High	KVI04611.1 Elongation factor, GTP-binding domain-containing protein [Cynara cardunculus var. scolymus]	2874.68	2628.58	2467.43	2686.23	3241.71	2137.68	4549.44	7102.11	3841.63	2656.9	2688.54	5164.4	0.98823	0.514464	0.520592	-0.0170809	-0.958857	-0.941776
XP_022002487.1	1	1	12.71	0.923222	1.32547	Low	High	XP_022002487.1 uncharacterized protein LOC110899904 [Helianthus annuus]	10537.8	14387.1	9914.45	11301.3	13904.3	10047.8	26308.2	13618.6	6251.94	11613.1	11751.1	15392.9	0.988257	0.754448	0.763413	-0.0170422	-0.406507	-0.389465
OTG07957.1	2	1	21.84	0.0196054	1.51973	Low	High	OTG07957.1 putative RNI-like superfamily protein [Helianthus annuus]	4580.75	5666.59	4991.62	4109.37	4998.31	6307.36	6975.28	7952.2	8231.65	5079.66	5138.35	7719.71	0.988578	0.658012	0.665614	-0.0165737	-0.603815	-0.587242
XP_022030002.1	2	1	19.02	0.783067	1.21664	Low	High	XP_022030002.1 anthocyanidin 3-O-glucosyltransferase 2-like [Helianthus annuus]	40172.1	33949.8	25421.4	24848.3	22929.6	52888.1	50747.6	46232.5	24128.5	33181.1	33555.3	40369.5	0.988847	0.821934	0.831204	-0.0161809	-0.282906	-0.266725
KVI11157.1	1	1	9.78	0.270569	3.60437	Medium	Low	KVI11157.1 Pectinacetylesterase [Cynara cardunculus var. scolymus]	821.009	231.941	2977.92	1399.38	542.823	2131.39	747.446	127.105	255.631	1343.62	1357.86	376.727	0.989512	3.56657	3.60437	-0.0152102	1.83454	1.84975
XP_021988132.1	1	1	9.19	0.550727	2.89508	Low	High	XP_021988132.1 uncharacterized protein LOC110884727 isoform X1 [Helianthus annuus]	163014	79027.8	77541.7	116447	115555	90878	149471	711588	64158.7	106528	107626	308406	0.989791	0.345414	0.348977	-0.0148047	-1.5336	-1.5188
KVH27464.1	1	1	7.28	0.266133	1.16405	Low	High	KVH27464.1 CCAAT-binding factor [Cynara cardunculus var. scolymus]	7468.44	6154.92	6504.77	6327.31	6864.98	7139.82	8826.56	6571.66	8031.95	6709.37	6777.37	7810.06	0.989967	0.859068	0.867774	-0.0145471	-0.219155	-0.204608
KVI06817.1	1	1	6.81	0.539868	1.5931	Low	High	KVI06817.1 Aux/IAA-ARF-dimerization [Cynara cardunculus var. scolymus]	14992.9	21251.8	14124.4	13565.2	19947.6	17359.1	12013.5	44089.5	24140	16789.7	16957.3	26747.7	0.990116	0.627708	0.633974	-0.0143299	-0.671835	-0.657505
OTF87154.1	1	1	6.91	0.777363	1.68793	Low	High	OTF87154.1 putative phosphorylase kinase, gamma catalytic subunit [Helianthus annuus]	67614.8	382866	98008.7	125011	193053	235559	862100	52622	11087.6	182830	184541	308603	0.990728	0.592443	0.597988	-0.0134397	-0.755252	-0.741813
ALI57393.1	6	2	150.9	0.968854	1.04327	Low	High	ALI57393.1 glyceraldehyde 3-phosphate dehydrogenase, partial [Lactuca sativa]	15504.9	35795.2	20108.2	22535.4	24255.5	25282.5	37797.3	17404.3	19296.7	23802.8	24024.5	24832.8	0.990774	0.958524	0.96745	-0.0133728	-0.0611137	-0.0477409
XP_022023411.1	1	1	9.87	0.035091	1.35705	Low	High	XP_022023411.1 uncharacterized protein LOC110923653 [Helianthus annuus]	5863	6114.88	5945.42	7020.15	5625.14	5443.21	8836.85	6749.88	8735.99	5974.43	6029.5	8107.58	0.990867	0.736895	0.743687	-0.0132367	-0.440469	-0.427232
OTF86887.1	2	2	23.83	0.0585755	1.73638	Low	High	OTF86887.1 putative oxidoreductase, zinc-binding dehydrogenase family protein [Helianthus annuus]	4928.83	4338.56	3492.27	3657.36	4184.57	5020.6	9483.47	7789.18	4882.95	4253.22	4287.51	7385.2	0.992001	0.575911	0.580555	-0.0115865	-0.796083	-0.784497
KVH95520.1	2	2	14.27	0.0239313	1.68701	Low	High	KVH95520.1 Armadillo-like helical [Cynara cardunculus var. scolymus]	4156.48	3966.99	3608.92	3399.25	4310.04	4117.04	4789.01	8376.71	6626.99	3910.8	3942.11	6597.57	0.992057	0.592764	0.59751	-0.0115056	-0.754471	-0.742966
KVH96062.1	1	1	14.6	0.816506	1.07786	Medium	Low	KVH96062.1 General substrate transporter [Cynara cardunculus var. scolymus]	11984.1	7115.07	19682.1	15992.9	6579.05	16515.9	14653.6	1792.16	19818.5	12927.1	13029.3	12088.1	0.992158	1.06941	1.07786	-0.0113588	0.0968129	0.108172
OTG18047.1	2	2	17.35	0.942878	1.09547	Low	High	OTG18047.1 putative START domain, PH domain-like, START-like domain protein [Helianthus annuus]	49173	49528.3	44021.2	48824.3	54978.3	39977.7	72930.1	38015.4	45402.6	47574.2	47926.8	52116	0.992644	0.912852	0.919617	-0.0106521	-0.131547	-0.120895
OTG22553.1	1	1	10.88	0.756552	1.3866	Low	High	OTG22553.1 putative glycerol-3-phosphate O-acyltransferase, chloroplast [Helianthus annuus]	31373.4	27241.8	22982.9	31555.9	35734.6	14909.7	45644.5	51200.1	16299.6	27199.4	27400	37714.7	0.992677	0.721187	0.726507	-0.010604	-0.471555	-0.460951
OTG29468.1	1	1	9.28	0.630683	1.19556	Low	High	OTG29468.1 putative cupredoxin [Helianthus annuus]	3552.29	2796.83	3229.02	3270.18	4028.09	2349.34	4443.36	2707.56	4300.27	3192.71	3215.87	3817.07	0.992799	0.836431	0.842498	-0.0104263	-0.257682	-0.247255
KVH96281.1	1	1	9.19	0.128387	4.58938	Low	High	KVH96281.1 Concanavalin A-like lectin/glucanase, subgroup, partial [Cynara cardunculus var. scolymus]	3426.93	15409.9	5666.42	6709.47	7270.73	10696.2	37228.8	66891.4	8334.57	8167.76	8225.46	37484.9	0.992985	0.217894	0.219434	-0.010156	-2.1983	-2.18814
OTG09518.1	1	1	9.92	0.181512	1.52651	Low	High	OTG09518.1 putative chromatin remodeling factor, putative [Helianthus annuus]	23539.1	17559.9	18118.5	24393.9	24119.5	11118.3	32323.2	33694.1	24378.8	19739.2	19877.3	30132	0.993053	0.655089	0.659672	-0.0100576	-0.610236	-0.600179
KVH98579.1	1	1	8	0.460936	1.34148	Medium	Low	KVH98579.1 DEP domain-containing protein, partial [Cynara cardunculus var. scolymus]	19063.5	25363.8	18771.2	13141.1	30878.9	19611	19504.3	13794.2	14135	21066.2	21210.3	15811.1	0.993204	1.33236	1.34148	-0.00983848	0.413987	0.423826
KVH89287.1	5	1	60.76	0.0924162	1.99671	Low	High	KVH89287.1 Ribosomal protein L18a [Cynara cardunculus var. scolymus]	4773.72	7125.72	3457.59	6400.02	6370.56	2683.71	12350.5	10584.9	7728.14	5119.01	5151.43	10221.2	0.993707	0.500825	0.503997	-0.00910778	-0.997622	-0.988514
KVH92880.1	1	1	9.7	0.0820591	2.14513	Low	High	KVH92880.1 DNA/RNA helicase, DEAD/DEAH box type, N-terminal [Cynara cardunculus var. scolymus]	4289.55	6775.27	5163.35	5764.49	5866.1	4692.38	8159.1	19283.1	7369.32	5409.39	5440.99	11603.8	0.994193	0.466172	0.468896	-0.00840258	-1.10106	-1.09266
KVI10392.1	1	1	10.32	0.973859	1.07383	Low	High	KVI10392.1 Aspartate carbamoyltransferase [Cynara cardunculus var. scolymus]	338002	481221	198285	163585	394544	464685	350867	531089	210670	339169	340938	364209	0.994812	0.931249	0.936106	-0.00750364	-0.10276	-0.0952567
OTG22913.1	1	1	8.8	0.85933	1.30176	Low	High	OTG22913.1 putative concanavalin A-like lectin/glucanase domain-containing protein [Helianthus annuus]	2369.12	4900.88	6491.56	5486.55	3599.87	4746.33	4479.15	10325.4	3109.79	4587.19	4610.92	5971.44	0.994853	0.768188	0.772162	-0.00744484	-0.380469	-0.373024
KVH99018.1	2	2	23.88	0.997681	1.13683	Low	High	KVH99018.1 ATPase, V1 complex, subunit C [Cynara cardunculus var. scolymus]	22403.1	11497.8	15142.3	23924.9	16113.2	9228.12	26027.8	5795.08	23930.7	16347.7	16422.1	18584.5	0.995474	0.879641	0.88364	-0.00654415	-0.185013	-0.178469
KVI04072.1	2	2	25.35	0.969299	1.04372	Medium	Low	KVI04072.1 Heavy metal-associated domain, HMA [Cynara cardunculus var. scolymus]	4339.28	2117.47	5939.11	3874.34	5618.8	2953.29	4787.84	1917.64	5219.58	4131.95	4148.81	3975.02	0.995937	1.03948	1.04372	-0.0058738	0.0558613	0.0617351
KVI11910.1	7	2	91.03	0.176641	1.51841	Low	High	KVI11910.1 Alpha crystallin/Hsp20 domain-containing protein [Cynara cardunculus var. scolymus]	29093	15197.9	19645.5	27740	17524.6	18921	42051.3	28537.2	26493	21312.1	21395.2	32360.5	0.996117	0.658586	0.661153	-0.00561336	-0.602557	-0.596944
KVI12466.1	3	2	29.65	0.158596	1.37375	Low	High	KVI12466.1 Glutathione S-transferase/chloride channel, C-terminal [Cynara cardunculus var. scolymus]	14282.9	11707.3	9760.94	9491.2	14705.7	11685.9	18205.1	17879.4	13028.8	11917	11960.9	16371.1	0.996329	0.727932	0.730614	-0.00530531	-0.458124	-0.452819
KVI11997.1	4	4	43.31	0.420116	1.35869	Medium	Low	KVI11997.1 hypothetical protein Ccrd_009582 [Cynara cardunculus var. scolymus]	58491.9	35034.6	42796.5	48883.3	57870.4	30013.2	40741.9	22910.5	37008.6	45441	45589	33553.7	0.996755	1.35428	1.35869	-0.0046887	0.437526	0.442215
OTG14938.1	4	2	48.41	0.779439	1.15061	Low	High	OTG14938.1 putative isocitrate/isopropylmalate dehydrogenase family protein [Helianthus annuus]	21054.5	24797	29095.2	24214.4	36396.3	14577.9	24071.6	24424.2	37738.4	24982.2	25062.9	28744.7	0.996783	0.869106	0.871911	-0.00464868	-0.202396	-0.197747
OTG19130.1	1	1	6	0.572011	1.57481	Low	High	OTG19130.1 putative insulinase (Peptidase family M16) family protein [Helianthus annuus]	22354.3	30752.5	14487.2	38711.4	23531.7	5568.2	53417.4	17498.1	35532	22531.3	22603.8	35482.5	0.996795	0.634999	0.637041	-0.00463145	-0.655174	-0.650543
OTF95337.1	2	1	17.65	0.0819907	5.70546	Low	High	OTF95337.1 putative potassium channel, voltage-dependent, EAG/ELK/ERG, Ankyrin repeat-containing domain protein [Helianthus annuus]	1715.68	1583.85	2186.06	2915.4	1600.99	985.274	2766.5	5394.02	23137.3	1828.53	1833.89	10432.6	0.997078	0.175271	0.175784	-0.00422208	-2.51234	-2.50812
ARH07512.1	1	1	7.76	0.100709	1.48239	Medium	Low	ARH07512.1 cytochrome c biogenesis protein (chloroplast) [Hinterhubera ericoides]	254108	277168	337141	245797	295731	329430	176912	139565	271061	289473	290320	195846	0.997082	1.47806	1.48239	-0.0042153	0.563706	0.567922
KVH92793.1	1	1	10.18	0.0137418	2.61538	Low	High	KVH92793.1 Armadillo-like helical [Cynara cardunculus var. scolymus]	5990.85	9751	11748.7	7445.57	7306.27	12814.5	17064.5	26685.7	28148	9163.51	9188.8	23966.1	0.997248	0.382354	0.383409	-0.00397547	-1.38702	-1.38304
KVH92498.1	2	1	21.92	0.710928	4.90703	Low	High	KVH92498.1 ATPase, V1/A1 complex, subunit E [Cynara cardunculus var. scolymus]	2767.75	8596.69	1265.86	1833.79	7174.7	3649.69	8919.89	52146.6	910.783	4210.1	4219.39	20659.1	0.997797	0.203789	0.204239	-0.00318192	-2.29485	-2.29167
XP_022000400.1	2	1	18.3	0.917418	1.10643	Medium	Low	XP_022000400.1 remorin-like [Helianthus annuus]	4045.78	5473.95	10025.6	6433.87	8493.73	4652.35	3449.7	8559.42	5687.33	6515.11	6526.65	5898.82	0.998231	1.10448	1.10643	-0.00255389	0.143363	0.145917
OTG18390.1	1	1	6.57	0.578294	6.1078	Low	High	OTG18390.1 putative potassium transporter [Helianthus annuus]	1914.44	4160.82	2806.27	2623.28	3096	3176.56	1464.74	4011.41	48770.5	2960.51	2965.28	18082.2	0.998391	0.163725	0.163989	-0.00232292	-2.61065	-2.60833
KVH90177.1	1	1	6.25	0.0161552	1.77416	Low	High	KVH90177.1 hypothetical protein Ccrd_007772 [Cynara cardunculus var. scolymus]	28939.8	26485.9	19653.2	25467.3	20912.4	28759.9	44499.4	53381.8	35320.9	25026.3	25046.5	44400.7	0.999192	0.563646	0.564102	-0.00116686	-0.827139	-0.825972
KVI04159.1	1	1	7.15	0.142881	1.72695	Low	High	KVI04159.1 Glycoside hydrolase, catalytic domain-containing protein [Cynara cardunculus var. scolymus]	8715.64	5106.14	5637.11	5991.76	7213.86	6264.84	9886.46	16616.7	7101.39	6486.29	6490.15	11201.5	0.999406	0.579054	0.579399	-0.000857609	-0.788229	-0.787372
KVH97628.1	2	1	23.67	0.666738	1.20447	Low	High	KVH97628.1 Galactose mutarotase-like domain-containing protein, partial [Cynara cardunculus var. scolymus]	3155.52	3100.43	2855.7	2818.5	3387.58	2910.48	5048.38	2444.04	3482.31	3037.21	3038.85	3658.24	0.99946	0.830239	0.830687	-0.000778977	-0.268402	-0.267623
OTG22062.1	1	1	10.85	0.572862	1.45471	Low	High	OTG22062.1 putative tetratricopeptide repeat (TPR)-like superfamily protein [Helianthus annuus]	133489	126638	96975.2	68489.3	187490	101170	193215	239872	86393	119034	119050	173160	0.999868	0.687424	0.687515	-0.000190925	-0.540728	-0.540537
KVH95119.1	1	1	8.54	0.626159	1.36766	Low	Medium	KVH95119.1 Pentatricopeptide repeat-containing protein [Cynara cardunculus var. scolymus]	29084	54459.1	31003.4	35309.1	45023.7	34133	46343.3	80446.3	29761.1	38182.2	38155.3	52183.6	1.00071	0.731689	0.731173	0.00101746	-0.450697	-0.451715
OTF86603.1	1	1	12.02	0.783	1.38704	High	Low	OTF86603.1 putative NB-ARC [Helianthus annuus]	7148.44	11512.6	13727.6	5201.61	22113.6	5046.26	6992.39	9103.32	7255.27	10796.2	10787.1	7783.66	1.00084	1.38704	1.38587	0.00121322	0.472006	0.470793
KVH94632.1	4	4	40.94	0.0895047	1.51658	Low	Medium	KVH94632.1 Barwin-like endoglucanase [Cynara cardunculus var. scolymus]	11853.2	13514.3	11351	11965.5	15538.5	9172.29	21076.8	20787.3	13758.5	12239.5	12225.4	18540.9	1.00115	0.660137	0.659378	0.00166008	-0.599163	-0.600823
XP_021994959.1	1	1	7.07	0.450732	1.5566	High	Low	XP_021994959.1 protein FAR1-RELATED SEQUENCE 5-like [Helianthus annuus]	30788.5	20839.2	47765	38835.8	43848.3	16594.1	18982.7	19468.9	25400.9	33130.9	33092.7	21284.2	1.00115	1.5566	1.5548	0.00166392	0.638397	0.636733
KVI05599.1	1	1	11.43	0.181362	1.70577	Low	Medium	KVI05599.1 Acyl-CoA N-acyltransferase [Cynara cardunculus var. scolymus]	13327	13963.1	8100.9	14724.4	13311.8	7312.36	19776	27230.8	13289.7	11797	11782.9	20098.8	1.0012	0.586949	0.586246	0.00172975	-0.768692	-0.770422
KVH95129.1	2	1	16.23	0.408872	2.06889	Low	Medium	KVH95129.1 Pectinesterase, active site-containing protein [Cynara cardunculus var. scolymus]	2430.7	5759.11	3193.77	3441.17	3101.57	4821.58	4029.08	15535.8	3946.58	3794.52	3788.1	7837.17	1.00169	0.48417	0.483351	0.00244283	-1.04641	-1.04886
OTG23090.1	1	1	7.45	0.08858	4.11095	High	Low	OTG23090.1 hypothetical protein HannXRQ_Chr06g0178571 [Helianthus annuus]	81226.9	97378.9	307882	104229	304473	76835.1	21318.6	16129.5	80891.5	162163	161845	39446.5	1.00196	4.11095	4.10291	0.00282465	2.03947	2.03665
ABO36543.1	3	2	29.55	0.167044	1.81022	Low	Medium	ABO36543.1 plastid enolase [Helianthus annuus]	7470.74	7623.32	4250.6	9231.88	7100.78	2965.99	13716.8	12345.6	8872.31	6448.22	6432.88	11644.9	1.00238	0.553737	0.55242	0.00343477	-0.852727	-0.856162
KVH92328.1	13	3	209.38	0.459134	1.2166	Low	Medium	KVH92328.1 14-3-3 domain-containing protein, partial [Cynara cardunculus var. scolymus]	32149.5	29981.6	33249.5	29794.2	39814.2	25545.3	50132.9	32117	33514.1	31793.5	31717.9	38588	1.00238	0.823922	0.821962	0.00343672	-0.27942	-0.282856
ABP93351.1	1	1	7.13	0.0709192	2.8678	Low	Medium	ABP93351.1 lysophosphatidyl acyltransferase 2 [Helianthus annuus]	2533.41	5482.28	3298.57	7390.62	2542.41	1352.1	10099.5	14455.6	7808.47	3771.42	3761.71	10787.8	1.00258	0.349599	0.348699	0.00371856	-1.51623	-1.51994
KVH98158.1	1	1	11.42	0.0308618	2.71021	Low	Medium	KVH98158.1 26S proteasome, regulatory subunit Rpn7 [Cynara cardunculus var. scolymus]	4906.29	6364.02	4303.42	6467.6	6063.42	3002.43	17091	17217.8	7790.13	5191.24	5177.82	14033	1.00259	0.369932	0.368975	0.0037362	-1.43467	-1.4384
KVI04774.1	1	1	11.13	0.787799	1.4288	High	Low	KVI04774.1 hypothetical protein Ccrd_016908, partial [Cynara cardunculus var. scolymus]	5396.4	2841.65	8475.2	10171.1	3358.55	3140.19	4807.29	4043.45	2846.7	5571.08	5556.6	3899.15	1.00261	1.4288	1.42508	0.00375534	0.5148	0.511044
ABD47280.1	1	1	9.46	0.679543	1.22201	Low	Medium	ABD47280.1 hypothetical chloroplast RF1 (chloroplast) [Lactuca sativa]	188605	88342.8	71310.8	95798.2	163471	88029.1	183817	111545	129040	116086	115766	141467	1.00276	0.820587	0.818325	0.00398297	-0.285272	-0.289255
OTF90532.1	1	1	6.94	0.915305	1.05542	Low	Medium	OTF90532.1 putative telomeric DNA binding protein 1 [Helianthus annuus]	18853.3	10525	5837.92	11007.4	11419.8	12684.7	13450	8135.26	15472.6	11738.7	11704	12352.6	1.00297	0.9503	0.947488	0.00427555	-0.0735446	-0.0778202
KVI04507.1	3	1	30.09	0.0123083	2.03685	Low	Medium	KVI04507.1 Glutamate dehydrogenase [Cynara cardunculus var. scolymus]	7201.81	6553.52	6219.21	7910.51	7108.2	4890.61	15612.3	15351.8	9588.08	6658.18	6636.44	13517.4	1.00328	0.492563	0.490955	0.00471866	-1.02162	-1.02634
OTG32271.1	2	2	13.52	0.510958	1.20842	Low	Medium	OTG32271.1 putative dnaJ domain, Myb-like DNA-binding domain protein [Helianthus annuus]	7911.22	5243.66	7798.96	8720.76	5474.55	6679.48	9594	6630.09	9001.45	6984.61	6958.27	8408.51	1.00379	0.83066	0.827526	0.00545242	-0.26767	-0.273123
KVH99089.1	1	1	15.09	0.915176	1.06424	Low	Medium	KVH99089.1 NADH-ubiquinone oxidoreductase, 21kDa subunit, N-terminal [Cynara cardunculus var. scolymus]	26353	20191.2	26133.8	16971.8	32902.4	22518.4	25972	30910.8	20160	24226	24130.9	25681	1.00394	0.943345	0.939641	0.0056755	-0.0841425	-0.089818
ABV26711.1	8	1	136.62	0.268519	1.42484	Low	Medium	ABV26711.1 cyclophilin [Gerbera hybrid cultivar]	21613.2	30130.8	18441.3	20678	34978	14191.4	37867.3	31572.4	30081.3	23395.1	23282.5	33173.7	1.00484	0.70523	0.701835	0.0069623	-0.503833	-0.510796
OTF97474.1	2	1	17.94	0.239011	1.7578	Low	Medium	OTF97474.1 putative plastid lipid-associated protein/fibrillin conserved domain-containing protein [Helianthus annuus]	35412.5	14955	23085.2	19783.8	33609.2	19675.2	36773.2	64776	26890	24484.2	24356.1	42813.1	1.00526	0.571887	0.568893	0.00757205	-0.806199	-0.813771
KVI06462.1	7	7	119.38	0.186159	1.53784	Low	Medium	KVI06462.1 Ribosomal protein S19e [Cynara cardunculus var. scolymus]	23349.5	28381.5	25535.2	30188.6	26623	20028.2	42030.1	51659.4	24477.7	25755.4	25613.3	39389.1	1.00555	0.653871	0.650263	0.00798403	-0.612922	-0.620906
XP_022031282.1	1	1	8.64	0.984275	1.01743	High	Low	XP_022031282.1 F-box protein At2g02240-like [Helianthus annuus]	4630.2	5720.84	6085.08	5575.78	6333.72	4431.33	6688.39	5088.89	4377.21	5478.71	5446.94	5384.83	1.00583	1.01743	1.01153	0.00838998	0.0249357	0.0165457
OTG06857.1	1	1	6.64	0.509656	1.46752	Low	Medium	OTG06857.1 putative jacalin-like lectin domain-containing protein [Helianthus annuus]	2404.5	1487.42	2809.05	2893.58	1110.45	2653.59	2601.97	4946.41	2221.79	2233.66	2219.21	3256.72	1.00651	0.68586	0.681423	0.00936238	-0.544014	-0.553377
AGZ03632.1	13	3	271.89	0.826182	1.14624	Low	Medium	AGZ03632.1 glyceraldehyde 3-phosphate dehydrogenase, partial [Echinacea tennesseensis]	108226	179901	116741	125783	167616	108826	204913	108840	147292	134956	134075	153682	1.00657	0.878152	0.87242	0.00944795	-0.187457	-0.196905
OTF98187.1	2	1	20.22	0.198822	1.39499	Low	Medium	OTF98187.1 putative serine/threonine-protein kinase pim-1/2/3 [Helianthus annuus]	20276.3	12105.2	20367.9	21573.5	16238	14589.1	20726.4	23053.2	29318.6	17583.2	17466.9	24366.1	1.00666	0.721625	0.716853	0.00957261	-0.470678	-0.480251
CAY09642.1	11	10	132.75	0.221487	1.79593	Low	Medium	CAY09642.1 unnamed protein product [Helianthus annuus]	15941.7	25095.9	20498.2	23754.2	16281.3	21078.3	31195.9	58582.1	19978.2	20511.9	20371.3	36585.4	1.00691	0.560659	0.556814	0.00992832	-0.834804	-0.844733
OTG03185.1	1	1	6.02	0.733784	1.46367	Low	Medium	OTG03185.1 putative cytochrome P450 [Helianthus annuus]	6231.84	7494.9	4358.87	5870.93	7570.71	4518.87	5269.07	15954.7	5064.49	6028.54	5986.83	8762.75	1.00697	0.687973	0.683214	0.0100145	-0.539576	-0.54959
KVI03397.1	5	5	72.41	0.453278	1.23787	Low	Medium	KVI03397.1 Proteasome, alpha-subunit, N-terminal domain-containing protein [Cynara cardunculus var. scolymus]	19905.7	31523.6	21168.9	24166.1	22962.3	24899.4	30577.9	36624.7	21958.2	24199.4	24009.3	29720.3	1.00792	0.814239	0.807842	0.0113802	-0.296476	-0.307856
KVH98368.1	1	1	6.37	0.159034	1.68015	Low	Medium	KVH98368.1 protein of unknown function DUF547 [Cynara cardunculus var. scolymus]	9359.75	6984.29	4953.92	4473.76	9568.33	7082.97	15613.3	8871.8	11008.3	7099.32	7041.69	11831.1	1.00818	0.600055	0.595183	0.0117596	-0.736834	-0.748594
AFK93531.1	1	1	10.03	0.100137	2.20201	Low	Medium	AFK93531.1 germacrene A synthase [Artemisia annua]	15013.7	15914.5	8311.99	11000.1	13291	14608.2	25371.1	44975.7	15309.9	13080.1	12966.5	28552.2	1.00876	0.45811	0.454131	0.0125865	-1.12623	-1.13882
KVI08660.1	1	1	7.35	0.708909	1.22761	Low	Medium	KVI08660.1 hypothetical protein Ccrd_012958 [Cynara cardunculus var. scolymus]	40614.1	37719.4	25683.3	26877.3	41249.3	34971.5	60020.1	29047.4	37496.7	34672.2	34366	42188.1	1.00891	0.82185	0.814592	0.012798	-0.283053	-0.295851
OTG16385.1	6	3	91.58	0.0807704	1.94194	Low	Medium	OTG16385.1 putative malate dehydrogenase [Helianthus annuus]	33361	36813.6	20005.1	44325.2	27982.2	17075.1	71027.1	54314.9	48233.6	30059.9	29794.2	57858.5	1.00892	0.519541	0.514949	0.0128091	-0.94469	-0.957499
KVI11346.1	5	5	60.57	0.583556	1.31812	Low	Medium	KVI11346.1 hypothetical protein Ccrd_010245 [Cynara cardunculus var. scolymus]	91514	96589.2	53388.5	107433	91118.3	40801.8	141246	95435.4	78814	80497.2	79784.3	105165	1.00894	0.765437	0.758658	0.0128348	-0.385644	-0.398479
XP_021986761.1	1	1	11.61	0.670076	1.26932	Low	Medium	XP_021986761.1 protein RAFTIN 1A-like isoform X1 [Helianthus annuus]	38948.7	28915.3	11238.2	33561.7	31588.4	13204.3	39378.8	33661.2	26416.6	26367.4	26118.1	33152.2	1.00955	0.795345	0.787825	0.0137053	-0.330348	-0.344053
OTG04268.1	2	1	17.58	0.468047	1.39515	High	Low	OTG04268.1 putative cytochrome P450 [Helianthus annuus]	1.1218e+06	1.34609e+06	1.11462e+06	717435	1.70493e+06	1.12615e+06	271517	1.52874e+06	767574	1.19417e+06	1.18284e+06	855943	1.00958	1.39515	1.38191	0.0137568	0.480423	0.466666
KVH41002.1	3	1	76.45	0.10812	1.55826	Low	Medium	KVH41002.1 Lactate dehydrogenase/glycoside hydrolase, family 4, C-terminal [Cynara cardunculus var. scolymus]	38123.3	53514.1	30153.1	48250.8	39255.5	33109.2	76321.7	47520.1	64108.4	40596.8	40205.2	62650.1	1.00974	0.647993	0.641742	0.013985	-0.62595	-0.639935
KVH96853.1	1	1	8.23	0.76316	1.05574	High	Low	KVH96853.1 Heat shock protein 70 family [Cynara cardunculus var. scolymus]	500575	313206	236197	373384	284872	381113	495293	49543.3	449704	349993	346456	331513	1.01021	1.05574	1.04507	0.0146526	0.0782586	0.063606
KVI00895.1	2	2	24.45	0.0576948	1.54337	Low	Medium	KVI00895.1 Ribosomal protein L30e [Cynara cardunculus var. scolymus]	30479.3	24912.1	20061.3	26294.3	26825.4	21524.2	48665.9	35349.1	31188.2	25150.9	24881.3	38401.1	1.01084	0.654953	0.647932	0.0155494	-0.610536	-0.626086
KVH90774.1	5	5	90.18	0.488281	1.30435	Low	Medium	KVH90774.1 Ribosomal protein L11 [Cynara cardunculus var. scolymus]	98492.6	128672	103334	107818	128382	90561.4	161680	175753	88779.3	110166	108920	142071	1.01144	0.775433	0.766663	0.0164089	-0.366926	-0.383335
KVI05958.1	1	1	7.49	0.842755	1.08664	High	Low	KVI05958.1 AAA+ ATPase domain-containing protein [Cynara cardunculus var. scolymus]	47134.3	65297	46629	70219.9	47841.4	39198.8	61519.9	20175	64683.4	53020.1	52420	48792.8	1.01145	1.08664	1.07434	0.0164213	0.119872	0.103451
KVI07237.1	1	1	8.14	0.365867	1.48453	Low	Medium	KVI07237.1 Endonuclease/exonuclease/phosphatase, partial [Cynara cardunculus var. scolymus]	13776.2	21729.4	14724.9	13614.9	23816.1	12226.1	26582.5	32238.3	14896.7	16743.5	16552.4	24572.5	1.01155	0.681392	0.673614	0.0165631	-0.553443	-0.570006
XP_022001818.1	1	1	10.45	0.546377	2.09269	Low	Medium	XP_022001818.1 uncharacterized protein LOC110899236 [Helianthus annuus]	78548.9	89033.2	67904.3	99559.2	55868.5	77298.8	253728	192956	40340.8	78495.4	77575.5	162342	1.01186	0.48352	0.477854	0.017007	-1.04835	-1.06536
KVI00122.1	1	1	12.29	0.0548522	1.39944	High	Low	KVI00122.1 Aspartic peptidase [Cynara cardunculus var. scolymus]	13475.9	15403.5	16430.4	14862.4	14665	15243.9	12263.2	7900.41	12213.4	15103.3	14923.8	10792.3	1.01203	1.39944	1.38281	0.0172474	0.484854	0.467607
OTG03789.1	2	1	24.13	0.978841	1.12195	Low	Medium	OTG03789.1 putative HAD superfamily, subfamily IIIB acid phosphatase [Helianthus annuus]	3766.92	2433.61	5236.52	3620.2	5027.75	2652.02	6547.65	3817.75	2312.61	3812.35	3766.66	4226	1.01213	0.902117	0.891305	0.0173953	-0.148614	-0.166009
OTG17235.1	1	1	8.02	0.82261	1.19975	Low	Medium	OTG17235.1 putative dihydrosphingosine phosphate lyase [Helianthus annuus]	19556.4	11965.5	18970.7	14852.1	15243.2	19777.8	29804.1	13672	16359.3	16830.9	16624.4	19945.1	1.01242	0.843858	0.833505	0.0178101	-0.244927	-0.262737
ADE06486.1	6	1	96.33	0.145825	1.46644	Low	Medium	ADE06486.1 putative poly-ubiquitin, partial [Tragopogon porrifolius]	32418.8	43816.2	42240.1	28487.2	51712.7	36820	60249.5	67010.4	44342.7	39491.7	39006.6	57200.8	1.01243	0.690404	0.681924	0.0178288	-0.534488	-0.552317
KVI12524.1	1	1	7.9	0.48884	1.47206	High	Low	KVI12524.1 hypothetical protein Ccrd_009064 [Cynara cardunculus var. scolymus]	76229.3	55368.9	56186.1	34081	101061	50282.8	73120.1	9301.06	45144.4	62594.8	61808.3	42521.8	1.01272	1.47206	1.45357	0.0182422	0.557838	0.539596
OTF98766.1	1	1	7.16	0.152369	2.53041	Low	Medium	OTF98766.1 hypothetical protein HannXRQ_Chr14g0449201 [Helianthus annuus]	11838.7	12973.8	8084.15	9480.81	13144.7	9850.47	19148.7	51075.1	11953.7	10965.6	10825.3	27392.5	1.01295	0.400312	0.395193	0.0185693	-1.3208	-1.33937
OTG06712.1	1	1	16.27	0.0149965	1.81067	Low	Medium	OTG06712.1 putative heavy metal-associated domain, HMA [Helianthus annuus]	11650.6	11627	12565.7	13664.9	11339.8	10378.3	26656.3	22233.8	15176.6	11947.7	11794.3	21355.6	1.01301	0.559467	0.552283	0.0186476	-0.837874	-0.856521
KVI00842.1	6	1	100.11	0.414949	1.88461	Low	Medium	KVI00842.1 Aspartic peptidase [Cynara cardunculus var. scolymus]	145635	206076	192202	106924	251785	178179	257663	606071	148089	181304	178962	337274	1.01309	0.537557	0.530614	0.0187571	-0.895509	-0.914266
KVH91599.1	1	1	8.89	0.998382	1.05092	Low	Medium	KVH91599.1 hypothetical protein Ccrd_006376 [Cynara cardunculus var. scolymus]	136801	134961	18897.6	22183.1	139109	125563	124659	155996	20806.2	96886.5	95618.3	100487	1.01326	0.96417	0.95155	0.0190089	-0.0526404	-0.0716493
XP_022009774.1	1	1	6.72	0.224261	1.63829	Low	Medium	XP_022009774.1 uncharacterized protein LOC110909076 [Helianthus annuus]	3452.82	2525.77	3360.82	2229.1	3138.31	3846.43	3194.47	7581.01	4319.5	3113.14	3071.28	5031.66	1.01363	0.61871	0.610391	0.0195288	-0.692665	-0.712194
OTG35534.1	1	1	8.44	0.109622	1.9534	Low	Medium	OTG35534.1 putative solute carrier family 35 member SLC35F1/F2/F6 [Helianthus annuus]	7090.65	9069.83	6326.41	8084.29	11072.1	3028.02	15061.9	15587.1	12686.1	7495.63	7394.82	14445	1.01363	0.518907	0.511928	0.0195351	-0.946453	-0.965988
OTG19693.1	1	1	7.23	0.591339	1.3903	High	Low	OTG19693.1 putative ubiquitin carboxyl-terminal hydrolase-related protein [Helianthus annuus]	299597	207313	139136	331701	194835	110620	160648	36926.6	267108	215349	212385	154894	1.01395	1.3903	1.37117	0.0199911	0.475393	0.455402
KVH77846.1	1	1	6.29	0.864909	1.14302	High	Low	KVH77846.1 Nucleotide-binding, alpha-beta plait [Cynara cardunculus var. scolymus]	71923.8	32440.5	69362.6	66042.7	62346.6	42943.9	72616.1	32329.3	47044.4	57909	57111.1	50663.3	1.01397	1.14302	1.12727	0.0200164	0.192846	0.17283
OTG09880.1	2	1	14.33	0.826844	1.11826	High	Low	OTG09880.1 putative winged-helix DNA-binding transcription factor family protein [Helianthus annuus]	36030.9	24746.6	31597.1	34769.7	35476.3	20853.7	25035.5	19904.7	37665.8	30791.5	30366.6	27535.3	1.014	1.11826	1.10282	0.0200506	0.16125	0.141199
OTG26350.1	2	1	16.35	0.295491	1.57346	Low	Medium	OTG26350.1 putative DNA binding,ATP binding protein [Helianthus annuus]	67067.8	94568	100408	72483.2	102603	83189.9	147199	184913	74276.9	87348	86092.2	135463	1.01459	0.644812	0.635541	0.0208924	-0.63305	-0.653942
OTF96348.1	2	1	14.8	0.204404	1.86806	Low	Medium	OTF96348.1 putative NADH-dependent glutamate synthase [Helianthus annuus]	14266.6	11688.6	9059.12	12677.3	15230.3	6601.52	21341.1	31297.3	11826.8	11671.4	11503	21488.4	1.01464	0.543151	0.535313	0.020969	-0.880576	-0.901545
OTG14570.1	1	1	10.77	0.932912	1.06341	Low	Medium	OTG14570.1 putative eukaryotic aspartyl protease family protein [Helianthus annuus]	12776.4	16192.8	6823.06	16623.5	11508.3	7124.97	15610.2	10609.4	11272.7	11930.8	11752.3	12497.4	1.01519	0.954658	0.940375	0.0217485	-0.0669441	-0.0886926
XP_021995463.1	1	1	8	0.988395	1.01534	High	Medium	XP_021995463.1 uncharacterized protein LOC110892616 [Helianthus annuus]	27617.8	11952.4	28083.3	34812.4	17635.7	14183.3	22911.5	15101.7	29603.2	22551.2	22210.4	22538.8	1.01534	1.00055	0.985432	0.0219647	0.000792875	-0.0211718
KVG47225.1	3	1	36.88	0.955873	1.03587	High	Low	KVG47225.1 Allene oxide cyclase [Cynara cardunculus var. scolymus]	7349.6	3668.13	6810.1	3915.13	10622.8	3018.13	5167.39	3450.6	8592.47	5942.61	5852.04	5736.82	1.01548	1.03587	1.02008	0.0221578	0.050845	0.0286872
KVI02380.1	1	1	8.52	0.473645	1.26806	High	Low	KVI02380.1 Armadillo-like helical [Cynara cardunculus var. scolymus]	8180.82	5454.69	6278.03	7581.8	6343.92	5683.13	5854.8	7026.51	2822.59	6637.85	6536.28	5234.63	1.01554	1.26806	1.24866	0.0222451	0.342627	0.320382
KVI05095.1	1	1	9.45	0.771021	1.50512	High	Low	KVI05095.1 Heavy metal-associated domain, HMA [Cynara cardunculus var. scolymus]	1917.33	6000.79	4238.53	2052.08	2266	7639.98	1958.94	3513.29	2604.64	4052.22	3986.02	2692.29	1.01661	1.50512	1.48053	0.0237629	0.589878	0.566115
KVH91418.1	2	2	21.29	0.125164	1.9609	Low	Medium	KVH91418.1 NADH:ubiquinone oxidoreductase-like, 20kDa subunit, partial [Cynara cardunculus var. scolymus]	4150.02	6149.42	3170.03	5003.76	5245.73	2997.92	13320.4	5850.87	6805.57	4489.82	4415.81	8658.95	1.01676	0.518518	0.50997	0.023982	-0.947533	-0.971515
OTF95003.1	3	3	42.39	0.928781	1.05383	Low	Medium	OTF95003.1 putative LYR family of Fe/S cluster biogenesis protein [Helianthus annuus]	12661	8498.97	12515.6	8122.24	16582.5	8406.05	13579.2	12486.2	8827.84	11225.2	11036.9	11631.1	1.01706	0.965105	0.948918	0.0244014	-0.0512428	-0.0756442
KVI04324.1	1	1	8.36	0.497668	1.43727	High	Low	KVI04324.1 NADH-ubiquinone oxidoreductase, subunit 10 [Cynara cardunculus var. scolymus]	10065.7	8060.24	16314.5	8631.55	17508	7714.68	5588.87	4959.29	13414.2	11480.1	11284.7	7987.45	1.01732	1.43727	1.41281	0.024769	0.523334	0.498565
KVH88039.1	9	9	116.78	0.0493539	1.99795	Low	Medium	KVH88039.1 hypothetical protein Ccrd_024576 [Cynara cardunculus var. scolymus]	45498.5	58411.6	39019.4	50383.7	52170.9	37895.7	106635	118417	55561.1	47643.1	46816.8	93537.5	1.01765	0.509348	0.500513	0.0252426	-0.973277	-0.99852
KVH89603.1	1	1	10.32	0.272912	1.57684	Low	Medium	KVH89603.1 Leucine-rich repeat, cysteine-containing subtype [Cynara cardunculus var. scolymus]	7002.84	8877.24	4445.06	5796.05	8800.97	5374.67	13750.2	11237.1	6504.8	6775.05	6657.23	10497.4	1.0177	0.645404	0.634181	0.0253087	-0.631725	-0.657034
OTG20788.1	1	1	7.34	0.60476	30.3429	Low	Medium	OTG20788.1 putative leucine-rich repeat protein kinase family protein [Helianthus annuus]	2233.75	1456.61	2979.58	2986.96	2081.31	1478.14	1119.67	195743	1774.58	2223.31	2182.14	66212.5	1.01887	0.0335784	0.0329566	0.026967	-4.89632	-4.92329
OTG03303.1	5	2	78.85	0.789294	1.24221	High	Low	OTG03303.1 putative plant invertase/pectin methylesterase inhibitor superfamily [Helianthus annuus]	72364.4	49351.8	92389.6	41942.3	110247	57796	75443	45199.3	51716.9	71368.6	69995.2	57453	1.01962	1.24221	1.2183	0.0280345	0.312906	0.284872
KVI08236.1	8	2	119.91	0.749987	1.34717	Low	Medium	KVI08236.1 Aldo/keto reductase [Cynara cardunculus var. scolymus]	8081.83	14068.5	4848.22	11649.6	11015.1	3814.3	19055	7238.62	9378	8999.5	8826.31	11890.5	1.01962	0.756863	0.742297	0.0280353	-0.401896	-0.429932
OTF86036.1	1	1	7	0.59901	1.20252	High	Low	OTF86036.1 hypothetical protein HannXRQ_Chr17g0546381 [Helianthus annuus]	5324.49	5081.49	5123.35	5458.09	3829.88	5939.76	4176.28	1143.35	7594.39	5176.44	5075.91	4304.67	1.01981	1.20252	1.17916	0.0282957	0.266057	0.237762
KVG99932.1	2	2	21.05	0.915544	1.26666	Low	Medium	KVG99932.1 hypothetical protein Ccrd_026023 [Cynara cardunculus var. scolymus]	180740	289582	302114	227373	404346	125327	586919	169247	202751	257479	252348	319639	1.02033	0.80553	0.789479	0.0290376	-0.31199	-0.341027
XP_022010916.1	1	1	10.64	0.128673	2.38793	Low	Medium	XP_022010916.1 uncharacterized protein LOC110910598 isoform X1 [Helianthus annuus]	9832.95	10663.3	5203.89	6152.47	10535.7	8498.32	21295.6	29944.9	8903	8566.71	8395.5	20047.9	1.02039	0.427313	0.418773	0.029126	-1.22663	-1.25576
OTG11209.1	1	1	9.03	0.932841	1.08666	High	Low	OTG11209.1 putative heme peroxidase [Helianthus annuus]	1382.41	2971.71	5778.92	3134.29	3032.99	3762.48	4274.86	2506.16	2543.9	3377.68	3309.92	3108.31	1.02047	1.08666	1.06486	0.029237	0.119903	0.0906663
KVI03999.1	2	1	21.74	0.0225107	2.69472	Low	Medium	KVI03999.1 hypothetical protein Ccrd_017694, partial [Cynara cardunculus var. scolymus]	3196.24	3123.83	1901.46	4032.78	2101.88	1921.5	9275.31	7802.8	4630.93	2740.51	2685.39	7236.35	1.02053	0.378715	0.371097	0.0293168	-1.40082	-1.43013
KVG04787.1	1	1	18.1	0.974033	1.2003	Low	Medium	KVG04787.1 Caffeate O-methyltransferase (COMT) family [Cynara cardunculus var. scolymus]	13853.4	13758	7642.18	17870.4	9118.11	7536.01	18447.2	5016.68	17975.7	11751.2	11508.2	13813.2	1.02112	0.850721	0.833128	0.0301484	-0.233242	-0.26339
XP_022032684.1	2	1	13.44	0.959644	1.0806	Low	Medium	XP_022032684.1 uncharacterized protein LOC110933787 [Helianthus annuus]	13366.8	11677.1	12875.7	8862.43	19786.1	8486.54	20581.2	4648.58	14898.3	12639.9	12378.3	13376	1.02113	0.944966	0.925414	0.0301635	-0.0816652	-0.111829
AHF21052.1	4	4	52.24	0.206362	1.71881	Low	Medium	AHF21052.1 ATPase subunit 4 (mitochondrion) [Helianthus annuus]	15497.8	11197.2	10961.5	11498.1	17597.7	7775.56	31252.9	18251.5	13870.3	12552.2	12290.4	21124.9	1.0213	0.59419	0.581799	0.0304028	-0.751004	-0.781407
KVI10916.1	1	1	15.45	0.646074	1.13241	High	Low	KVI10916.1 Phosphate-induced protein 1 [Cynara cardunculus var. scolymus]	34270.8	22765	26829.7	28600.7	29432	23993.9	25941	27840.5	20277.9	27955.2	27342.2	24686.5	1.02242	1.13241	1.10758	0.0319872	0.179396	0.147409
KVI09706.1	2	2	24.69	0.976933	1.07874	Low	Medium	KVI09706.1 Alpha-D-phosphohexomutase, alpha/beta/alpha domain I, partial [Cynara cardunculus var. scolymus]	7012.35	7853.86	7491.07	8348.79	7018.5	6488.96	9153.3	9503.99	4919.85	7452.42	7285.42	7859.04	1.02292	0.948261	0.92701	0.0326981	-0.0766444	-0.109343
KVH93708.1	1	1	7.31	0.979583	1.03109	High	Low	KVH93708.1 Adenylate kinase, partial [Cynara cardunculus var. scolymus]	10235	12273.6	15204.5	10144.4	10638.2	16065.9	12795.3	9591.43	14189.4	12571.1	12282.8	12192	1.02347	1.03109	1.00745	0.0334649	0.0441684	0.0107034
KVI04465.1	1	1	7.69	0.251977	1.536	High	Low	KVI04465.1 Adaptor protein complex AP-3, delta subunit [Cynara cardunculus var. scolymus]	464969	620004	548324	304485	790119	501201	392607	351447	319288	544432	531935	354448	1.02349	1.536	1.50074	0.0335019	0.619181	0.585679
XP_022004371.1	1	1	6.44	0.433993	1.51658	High	Low	XP_022004371.1 uncharacterized protein LOC110901923 [Helianthus annuus]	23379.7	23116.7	30424.3	31073.2	32972	11098.2	13979.3	15676.6	21063.9	25640.2	25047.8	16906.6	1.02365	1.51658	1.48154	0.0337256	0.600821	0.567096
pir	2	1	21.46	0.261473	1.50829	Low	Medium		19318.6	22138.4	26894.2	14580.6	33044.5	19117.1	31961	44510.2	24195.7	22783.7	22247.4	33555.6	1.02411	0.678983	0.663001	0.0343661	-0.558552	-0.592918
[truncated: 1,333 more rows]
