# Supplementary material for: High variability of perezone content in rhizomes of Acourtia cordata wild plants, environmental factors related, and proteomic analysis
Source: PeerJ. 2023 Nov 15;11:e16136. doi: 10.7717/peerj.16136 (PMC10656900; doi:10.7717/peerj.16136)
Supplement: Supplemental Information 10 [file peerj-11-16136-s010.xlsx]

## Sheet: GO_enrich-upregulated
Supplementary Table S3. Gene Ontology (GO) enrichment analyses of A. cordata.
GO ID	GO Name	GO Category	FDR	p-value	Nr Test	Nr Reference	Non Annot Test	Non Annot Reference
GO:2000112	regulation of cellular macromolecule biosynthetic process	BIOLOGICAL_PROCESS	1	0.0304883	10	35	87	689
GO:0032508	DNA duplex unwinding	BIOLOGICAL_PROCESS	1	0.0382872	2	1	95	723
GO:0051171	regulation of nitrogen compound metabolic process	BIOLOGICAL_PROCESS	1	0.0484789	11	44	86	680
GO:0060255	regulation of macromolecule metabolic process	BIOLOGICAL_PROCESS	1	0.0398434	12	48	85	676
GO:0009889	regulation of biosynthetic process	BIOLOGICAL_PROCESS	1	0.0403574	10	37	87	687
GO:0006355	regulation of transcription, DNA-templated	BIOLOGICAL_PROCESS	1	0.0489432	9	33	88	691
GO:0019748	secondary metabolic process	BIOLOGICAL_PROCESS	1	0.0134048	3	2	94	722
GO:0031326	regulation of cellular biosynthetic process	BIOLOGICAL_PROCESS	1	0.0403574	10	37	87	687
GO:0080090	regulation of primary metabolic process	BIOLOGICAL_PROCESS	1	0.0484789	11	44	86	680
GO:2001141	regulation of RNA biosynthetic process	BIOLOGICAL_PROCESS	1	0.0489432	9	33	88	691
GO:1903506	regulation of nucleic acid-templated transcription	BIOLOGICAL_PROCESS	1	0.0489432	9	33	88	691
GO:0010556	regulation of macromolecule biosynthetic process	BIOLOGICAL_PROCESS	1	0.0304883	10	35	87	689
GO:0030162	regulation of proteolysis	BIOLOGICAL_PROCESS	1	0.0382872	2	1	95	723
GO:0032392	DNA geometric change	BIOLOGICAL_PROCESS	1	0.0382872	2	1	95	723
GO:0009941	chloroplast envelope	CELLULAR_COMPONENT	1	0.024524	3	3	94	721
GO:0009526	plastid envelope	CELLULAR_COMPONENT	1	0.024524	3	3	94	721
GO:0031625	ubiquitin protein ligase binding	MOLECULAR_FUNCTION	1	0.0382872	2	1	95	723
GO:0016462	pyrophosphatase activity	MOLECULAR_FUNCTION	1	0.0318954	8	25	89	699
GO:0016817	hydrolase activity, acting on acid anhydrides	MOLECULAR_FUNCTION	1	0.0442239	8	27	89	697
GO:0016818	hydrolase activity, acting on acid anhydrides, in phosphorus-containing anhydrides	MOLECULAR_FUNCTION	1	0.0442239	8	27	89	697
GO:0003678	DNA helicase activity	MOLECULAR_FUNCTION	1	0.013832	2	0	95	724
GO:0016903	oxidoreductase activity, acting on the aldehyde or oxo group of donors	MOLECULAR_FUNCTION	1	0.0144599	4	5	93	719
GO:0005515	protein binding	MOLECULAR_FUNCTION	1	0.00383571	12	33	85	691
GO:0016620	oxidoreductase activity, acting on the aldehyde or oxo group of donors, NAD or NADP as acceptor	MOLECULAR_FUNCTION	1	0.0048505	4	3	93	721
GO:0046914	transition metal ion binding	MOLECULAR_FUNCTION	1	0.0268831	14	56	83	668
GO:0004386	helicase activity	MOLECULAR_FUNCTION	1	0.00538118	5	6	92	718
GO:0019899	enzyme binding	MOLECULAR_FUNCTION	1	0.00087471	5	3	92	721
GO:0030145	manganese ion binding	MOLECULAR_FUNCTION	1	0.0382872	2	1	95	723
GO:0044389	ubiquitin-like protein ligase binding	MOLECULAR_FUNCTION	1	0.0382872	2	1	95	723
