# Supplementary material for: High variability of perezone content in rhizomes of Acourtia cordata wild plants, environmental factors related, and proteomic analysis
Source: PeerJ. 2023 Nov 15;11:e16136. doi: 10.7717/peerj.16136 (PMC10656900; doi:10.7717/peerj.16136)
Supplement: Supplemental Information 12 [file peerj-11-16136-s012.xlsx]

## Sheet: Hoja1
Supplementary Table S5. KEGG enrichment analyses of upregulated proteins of A. cordata.
Pathway	#Enzymes Test	Pathway ID	Enzyme	#Test All	# Enzymes Ref	Enzyme	#Ref All	%Test	%Ref	p-value
Carbapenem biosynthesis	2	map00332	ec:1.2.1.41 - dehydrogenase, ec:2.7.2.11 - 5-kinase	125	2	ec:2.7.2.11 - 5-kinase, ec:1.2.1.41 - dehydrogenase	2122	1.6	0.0942507	0.00344386
Terpenoid backbone biosynthesis	3	map00900	ec:2.5.1.1 - geranyl-diphosphate synthase, ec:2.5.1.10 - diphosphate synthase, ec:2.3.1.9 - C-acetyltransferase	125	8	ec:1.1.1.34 - reductase (NADPH), ec:2.7.1.148 - 5'-diphospho)-2-C-methyl-D-erythritol kinase, ec:4.1.1.33 - decarboxylase, ec:2.5.1.10 - diphosphate synthase, ec:2.3.1.9 - C-acetyltransferase, ec:2.7.7.60 - 4-phosphate cytidylyltransferase, ec:2.5.1.1 - geranyl-diphosphate synthase, ec:5.3.3.2 - Delta-isomerase	2122	2.4	0.377003	0.00831597
Valine, leucine and isoleucine degradation	3	map00280	ec:2.3.1.16 - C-acyltransferase, ec:1.2.1.27 - dehydrogenase (CoA-acylating), ec:2.3.1.9 - C-acetyltransferase	125	11	ec:1.2.1.3 - dehydrogenase (NAD+), ec:3.1.2.4 - hydrolase, ec:1.2.1.27 - dehydrogenase (CoA-acylating), ec:1.1.1.35 - dehydrogenase, ec:1.8.1.4 - dehydrogenase, ec:2.3.1.9 - C-acetyltransferase, ec:6.4.1.4 - carboxylase, ec:4.2.1.17 - hydratase, ec:1.1.1.31 - dehydrogenase, ec:4.2.1.18 - hydratase, ec:2.3.1.16 - C-acyltransferase	2122	2.4	0.518379	0.0204986
Biosynthesis of antibiotics	9	map01130	ec:1.2.1.41 - dehydrogenase, ec:2.5.1.1 - geranyl-diphosphate synthase, ec:5.1.3.15 - 1-epimerase, ec:2.3.1.16 - C-acyltransferase, ec:2.5.1.10 - diphosphate synthase, ec:2.3.1.9 - C-acetyltransferase, ec:1.2.1.59 - dehydrogenase (NAD(P)+) (phosphorylating), ec:2.7.2.11 - 5-kinase, ec:1.2.1.12 - dehydrogenase (phosphorylating)	125	82	ec:1.1.1.34 - reductase (NADPH), ec:2.7.2.11 - 5-kinase, ec:2.3.1.1 - N-acetyltransferase, ec:3.5.1.14 - acid amidohydrolase, ec:1.3.5.1 - dehydrogenase, ec:4.1.1.32 - carboxykinase (GTP), ec:1.2.1.3 - dehydrogenase (NAD+), ec:1.5.1.2 - reductase, ec:4.1.1.39 - carboxylase, ec:1.2.4.1 - dehydrogenase (acetyl-transferring), ec:4.1.1.1 - decarboxylase, ec:6.4.1.2 - carboxylase, ec:1.1.1.183 - dehyd…	2122	7.2	3.86428	0.0285492
Benzoate degradation	2	map00362	ec:2.3.1.16 - C-acyltransferase, ec:2.3.1.9 - C-acetyltransferase	125	5	ec:1.1.1.35 - dehydrogenase, ec:2.3.1.9 - C-acetyltransferase, ec:4.1.3.17 - aldolase, ec:4.2.1.17 - hydratase, ec:2.3.1.16 - C-acyltransferase	2122	1.6	0.235627	0.0287829
Nitrotoluene degradation	1	map00633	ec:2.3.1.5 - N-acetyltransferase	125	1	ec:2.3.1.5 - N-acetyltransferase	2122	0.8	0.0471254	0.0589067
Ethylbenzene degradation	1	map00642	ec:2.3.1.16 - C-acyltransferase	125	1	ec:2.3.1.16 - C-acyltransferase	2122	0.8	0.0471254	0.0589067
Glycolysis / Gluconeogenesis	3	map00010	ec:5.1.3.15 - 1-epimerase, ec:1.2.1.59 - dehydrogenase (NAD(P)+) (phosphorylating), ec:1.2.1.12 - dehydrogenase (phosphorylating)	125	18	ec:4.1.1.32 - carboxykinase (GTP), ec:1.2.1.3 - dehydrogenase (NAD+), ec:1.2.4.1 - dehydrogenase (acetyl-transferring), ec:4.1.1.1 - decarboxylase, ec:2.3.1.12 - acetyltransferase, ec:5.1.3.15 - 1-epimerase, ec:2.7.2.3 - kinase, ec:1.8.1.4 - dehydrogenase, ec:2.7.1.1 - hexokinase type IV glucokinase, ec:1.2.1.12 - dehydrogenase (phosphorylating), ec:4.2.1.11 - hydratase, ec:1.1.1.1 - dehydrogenas…	2122	2.4	0.848256	0.0667868
Drug metabolism - other enzymes	2	map00983	ec:2.3.1.5 - N-acetyltransferase, ec:3.1.1.1 - ali-esterase	125	8	ec:2.7.1.21 - kinase, ec:2.7.1.48 - kinase, ec:3.1.1.1 - ali-esterase, ec:2.7.4.6 - kinase, ec:3.2.1.31 - beta-glucuronide glucuronohydrolase glucuronidase, ec:2.5.1.18 - transferase, ec:2.3.1.5 - N-acetyltransferase, ec:2.4.1.17 - 1-naphthol glucuronyltransferase	2122	1.6	0.377003	0.0673391
Fatty acid degradation	2	map00071	ec:2.3.1.16 - C-acyltransferase, ec:2.3.1.9 - C-acetyltransferase	125	9	ec:1.2.1.3 - dehydrogenase (NAD+), ec:4.2.1.74 - hydratase, ec:1.1.1.35 - dehydrogenase, ec:2.3.1.9 - C-acetyltransferase, ec:1.1.1.1 - dehydrogenase, ec:4.2.1.17 - hydratase, ec:6.2.1.3 - ligase, ec:2.3.1.16 - C-acyltransferase, ec:1.14.14.1 - monooxygenase	2122	1.6	0.424128	0.0815414
Arginine and proline metabolism	2	map00330	ec:1.2.1.41 - dehydrogenase, ec:2.7.2.11 - 5-kinase	125	9	ec:2.7.2.11 - 5-kinase, ec:1.5.3.16 - oxidase, ec:1.2.1.3 - dehydrogenase (NAD+), ec:1.5.1.2 - reductase, ec:2.6.1.1 - transaminase, ec:1.5.3.17 - polyamine oxidase, ec:3.5.3.11 - agmatine ureohydrolase, ec:1.2.1.41 - dehydrogenase, ec:3.5.3.1 - arginine amidinase	2122	1.6	0.424128	0.0815414
Propanoate metabolism	2	map00640	ec:1.2.1.27 - dehydrogenase (CoA-acylating), ec:2.3.1.9 - C-acetyltransferase	125	9	ec:3.1.2.4 - hydrolase, ec:1.2.1.27 - dehydrogenase (CoA-acylating), ec:6.4.1.2 - carboxylase, ec:1.8.1.4 - dehydrogenase, ec:2.3.1.9 - C-acetyltransferase, ec:4.2.1.17 - hydratase, ec:1.1.1.27 - dehydrogenase, ec:6.2.1.4 - ligase (GDP-forming), ec:6.2.1.5 - ligase (ADP-forming)	2122	1.6	0.424128	0.0815414
Caffeine metabolism	1	map00232	ec:2.3.1.5 - N-acetyltransferase	125	2	ec:2.3.1.5 - N-acetyltransferase, ec:1.14.14.1 - monooxygenase	2122	0.8	0.0942507	0.110926
Synthesis and degradation of ketone bodies	1	map00072	ec:2.3.1.9 - C-acetyltransferase	125	2	ec:2.3.1.9 - C-acetyltransferase, ec:1.1.1.30 - dehydrogenase	2122	0.8	0.0942507	0.110926
Cutin, suberine and wax biosynthesis	1	map00073	ec:1.2.1.84 - fatty acyl-CoA reductase	125	3	ec:2.3.1.20 - O-acyltransferase, ec:2.3.1.75 - O-fatty-acyltransferase, ec:1.2.1.84 - fatty acyl-CoA reductase	2122	0.8	0.141376	0.156656
Carbon fixation in photosynthetic organisms	2	map00710	ec:1.2.1.59 - dehydrogenase (NAD(P)+) (phosphorylating), ec:1.2.1.12 - dehydrogenase (phosphorylating)	125	15	ec:4.1.1.39 - carboxylase, ec:2.6.1.1 - transaminase, ec:2.7.2.3 - kinase, ec:1.2.1.12 - dehydrogenase (phosphorylating), ec:1.1.1.40 - dehydrogenase (oxaloacetate-decarboxylating) (NADP+), ec:3.1.3.37 - SBPase, ec:1.1.1.37 - dehydrogenase, ec:5.3.1.6 - isomerase, ec:1.2.1.13 - dehydrogenase (NADP+) (phosphorylating), ec:1.2.1.59 - dehydrogenase (NAD(P)+) (phosphorylating), ec:2.2.1.1 - glycolald…	2122	1.6	0.70688	0.165881
Purine metabolism	2	map00230	ec:3.6.1.3 - adenylpyrophosphatase, ec:3.6.1.15 - phosphatase	125	16	ec:3.6.1.15 - phosphatase, ec:2.7.7.7 - DNA polymerase, ec:2.7.4.3 - kinase, ec:3.6.1.9 - diphosphatase, ec:2.7.7.8 - nucleotidyltransferase, ec:3.6.1.3 - adenylpyrophosphatase, ec:2.7.4.6 - kinase, ec:2.7.7.4 - adenylyltransferase, ec:2.7.4.10 - kinase, ec:6.3.3.1 - cyclo-ligase, ec:3.6.1.5 - ATP-diphosphatase, ec:3.1.3.5 - uridine 5'-nucleotidase, ec:5.4.2.2 - (alpha-D-glucose-1,6-bisphosphate-…	2122	1.6	0.754006	0.178511
Fatty acid elongation	1	map00062	ec:2.3.1.16 - C-acyltransferase	125	4	ec:4.2.1.74 - hydratase, ec:1.1.1.35 - dehydrogenase, ec:4.2.1.17 - hydratase, ec:2.3.1.16 - C-acyltransferase	2122	0.8	0.188501	0.196652
Thiamine metabolism	1	map00730	ec:3.6.1.15 - phosphatase	125	4	ec:3.6.1.15 - phosphatase, ec:2.5.1.3 - phosphate synthase, ec:2.7.4.3 - kinase, ec:3.1.3.2 - phosphatase	2122	0.8	0.188501	0.196652
Geraniol degradation	1	map00281	ec:2.3.1.16 - C-acyltransferase	125	4	ec:1.1.1.183 - dehydrogenase (NADP+), ec:1.1.1.35 - dehydrogenase, ec:4.2.1.17 - hydratase, ec:2.3.1.16 - C-acyltransferase	2122	0.8	0.188501	0.196652
Biosynthesis of unsaturated fatty acids	1	map01040	ec:2.3.1.16 - C-acyltransferase	125	5	ec:1.1.1.100 - reductase, ec:1.14.19.2 - 9-desaturase, ec:4.2.1.17 - hydratase, ec:2.3.1.16 - C-acyltransferase, ec:1.14.19.6 - (9+3)-desaturase	2122	0.8	0.235627	0.231424
Ubiquinone and other terpenoid-quinone biosynthesis	1	map00130	ec:2.1.1.201 - methylase	125	5	ec:2.2.1.9 - synthase, ec:1.6.5.2 - dehydrogenase (quinone), ec:4.2.99.20 - synthase, ec:2.1.1.201 - methylase, ec:6.2.1.12 - ligase	2122	0.8	0.235627	0.231424
Lysine degradation	1	map00310	ec:2.3.1.9 - C-acetyltransferase	125	6	ec:1.2.1.3 - dehydrogenase (NAD+), ec:1.1.1.35 - dehydrogenase, ec:1.2.4.2 - dehydrogenase (succinyl-transferring), ec:2.3.1.9 - C-acetyltransferase, ec:4.2.1.17 - hydratase, ec:2.1.1.43 - N-methyltransferase	2122	0.8	0.282752	0.261442
Butanoate metabolism	1	map00650	ec:2.3.1.9 - C-acetyltransferase	125	7	ec:1.3.5.1 - dehydrogenase, ec:1.1.1.35 - dehydrogenase, ec:2.2.1.6 - synthase, ec:2.3.1.9 - C-acetyltransferase, ec:1.1.1.30 - dehydrogenase, ec:4.2.1.17 - hydratase, ec:1.2.1.16 - dehydrogenase [NAD(P)+]	2122	0.8	0.329877	0.287142
Galactose metabolism	1	map00052	ec:3.2.1.26 - invertase	125	8	ec:3.2.1.26 - invertase, ec:2.7.7.64 - uridylyltransferase, ec:3.2.1.20 - maltase, ec:2.7.1.1 - hexokinase type IV glucokinase, ec:2.7.7.9 - uridylyltransferase, ec:3.2.1.23 - lactase (ambiguous), ec:3.2.1.22 - melibiase, ec:5.4.2.2 - (alpha-D-glucose-1,6-bisphosphate-dependent)	2122	0.8	0.377003	0.308922
Pentose and glucuronate interconversions	1	map00040	ec:3.2.1.15 - pectin depolymerase	125	8	ec:3.2.1.15 - pectin depolymerase, ec:2.7.7.64 - uridylyltransferase, ec:5.3.1.5 - isomerase, ec:2.7.7.9 - uridylyltransferase, ec:3.2.1.31 - beta-glucuronide glucuronohydrolase glucuronidase, ec:3.2.1.67 - 1,4-alpha-galacturonidase, ec:3.1.1.11 - pectin demethoxylase, ec:2.4.1.17 - 1-naphthol glucuronyltransferase	2122	0.8	0.377003	0.308922
Tryptophan metabolism	1	map00380	ec:2.3.1.9 - C-acetyltransferase	125	9	ec:3.5.1.9 - kynurenine formamidase, ec:1.2.1.3 - dehydrogenase (NAD+), ec:1.1.1.35 - dehydrogenase, ec:1.2.4.2 - dehydrogenase (succinyl-transferring), ec:2.3.1.9 - C-acetyltransferase, ec:4.2.1.17 - hydratase, ec:1.11.1.6 - equilase, ec:4.1.1.28 - decarboxylase, ec:1.14.14.1 - monooxygenase	2122	0.8	0.424128	0.327152
alpha-Linolenic acid metabolism	1	map00592	ec:2.3.1.16 - C-acyltransferase	125	9	ec:4.2.1.92 - dehydratase, ec:1.3.1.42 - reductase, ec:5.3.99.6 - cyclase, ec:1.1.1.1 - dehydrogenase, ec:4.2.1.17 - hydratase, ec:1.13.11.12 - 13S-lipoxygenase, ec:3.1.1.4 - A2, ec:2.3.1.16 - C-acyltransferase, ec:3.1.1.32 - A1	2122	0.8	0.424128	0.327152
Glycerolipid metabolism	1	map00561	ec:3.1.1.23 - lipase	125	9	ec:2.3.1.20 - O-acyltransferase, ec:1.2.1.3 - dehydrogenase (NAD+), ec:3.1.1.23 - lipase, ec:2.3.1.22 - O-acyltransferase, ec:2.3.1.51 - O-acyltransferase, ec:2.7.7.9 - uridylyltransferase, ec:3.1.1.3 - lipase, ec:2.3.1.15 - 1-O-acyltransferase, ec:3.2.1.22 - melibiase	2122	0.8	0.424128	0.327152
Carbon fixation pathways in prokaryotes	1	map00720	ec:2.3.1.9 - C-acetyltransferase	125	11	ec:1.3.5.1 - dehydrogenase, ec:6.4.1.2 - carboxylase, ec:1.1.1.35 - dehydrogenase, ec:2.3.3.8 - citrate synthase, ec:2.3.1.9 - C-acetyltransferase, ec:1.1.1.37 - dehydrogenase, ec:4.2.1.17 - hydratase, ec:4.2.1.3 - hydratase, ec:1.1.1.42 - dehydrogenase (NADP+), ec:4.1.1.31 - carboxylase, ec:6.2.1.5 - ligase (ADP-forming)	2122	0.8	0.518379	0.354289
Alanine, aspartate and glutamate metabolism	1	map00250	ec:6.3.5.4 - synthase (glutamine-hydrolysing)	125	11	ec:3.5.1.111 - amidase, ec:1.4.1.14 - synthase (NADH), ec:2.6.1.1 - transaminase, ec:2.1.3.2 - carbamoyltransferase, ec:1.4.1.2 - dehydrogenase, ec:1.4.1.3 - dehydrogenase [NAD(P)+], ec:6.3.5.4 - synthase (glutamine-hydrolysing), ec:6.3.1.2 - synthetase, ec:3.5.1.3 - alpha-keto acid-omega-amidase, ec:1.2.1.16 - dehydrogenase [NAD(P)+], ec:1.4.1.4 - dehydrogenase (NADP+)	2122	0.8	0.518379	0.354289
Starch and sucrose metabolism	1	map00500	ec:3.2.1.26 - invertase	125	23	ec:3.2.1.4 - endo-1,4-beta-D-glucanase, ec:2.4.1.13 - synthase, ec:3.2.1.26 - invertase, ec:3.6.1.9 - diphosphatase, ec:2.4.1.34 - synthase, ec:2.4.1.14 - synthase, ec:3.2.1.20 - maltase, ec:2.7.7.27 - adenylyltransferase, ec:2.7.1.1 - hexokinase type IV glucokinase, ec:2.7.7.9 - uridylyltransferase, ec:2.4.1.1 - phosphorylase, ec:2.4.1.25 - disproportionating enzyme, ec:3.2.1.21 - gentiobiase, e…	2122	0.8	1.08388	0.357567
Glyoxylate and dicarboxylate metabolism	1	map00630	ec:2.3.1.9 - C-acetyltransferase	125	14	ec:3.5.1.9 - kynurenine formamidase, ec:1.1.1.79 - reductase (NADP+), ec:4.1.1.39 - carboxylase, ec:4.1.1.8 - decarboxylase, ec:2.3.1.9 - C-acetyltransferase, ec:1.1.1.37 - dehydrogenase, ec:1.1.99.14 - dehydrogenase, ec:1.11.1.6 - equilase, ec:2.1.2.1 - hydroxymethyltransferase, ec:4.2.1.3 - hydratase, ec:1.1.1.81 - reductase, ec:6.3.1.2 - synthetase, ec:1.1.3.15 - oxidase, ec:2.3.3.1 - (Si)-syn…	2122	0.8	0.659755	0.375996
Pyruvate metabolism	1	map00620	ec:2.3.1.9 - C-acetyltransferase	125	18	ec:4.1.1.32 - carboxykinase (GTP), ec:1.2.1.3 - dehydrogenase (NAD+), ec:1.1.1.79 - reductase (NADP+), ec:1.2.4.1 - dehydrogenase (acetyl-transferring), ec:6.4.1.2 - carboxylase, ec:2.3.1.12 - acetyltransferase, ec:1.8.1.4 - dehydrogenase, ec:2.3.1.9 - C-acetyltransferase, ec:1.1.2.4 - dehydrogenase (cytochrome), ec:1.1.1.40 - dehydrogenase (oxaloacetate-decarboxylating) (NADP+), ec:1.1.1.37 - de…	2122	0.8	0.848256	0.379258
