# Supplementary material for: High variability of perezone content in rhizomes of Acourtia cordata wild plants, environmental factors related, and proteomic analysis
Source: PeerJ. 2023 Nov 15;11:e16136. doi: 10.7717/peerj.16136 (PMC10656900; doi:10.7717/peerj.16136)
Supplement: Supplemental Information 13 [file peerj-11-16136-s013.xlsx]

## Sheet: Hoja1
Supplementary Table S6. KEGG enrichment analyses of downregulated proteins of A. cordata.
Pathway	#Enzymes Test	Pathway ID	Enzyme	#Test All	# Enzymes Ref	Enzyme	#Ref All	%Test	%Ref	p-value
Pyruvate metabolism	13	map00620	ec:4.1.1.3 - decarboxylase, ec:1.1.1.37 - dehydrogenase, ec:4.4.1.5 - lyase, ec:1.1.1.39 - dehydrogenase (decarboxylating), ec:1.1.1.38 - dehydrogenase (oxaloacetate-decarboxylating), ec:2.3.1.12 - acetyltransferase, ec:4.1.1.31 - carboxylase, ec:4.1.1.32 - carboxykinase (GTP), ec:1.1.1.40 - dehydrogenase (oxaloacetate-decarboxylating) (NADP+), ec:1.1.1.28 - dehydrogenase, ec:1.1.2.4 - dehydrogen…	491	18	ec:4.1.1.32 - carboxykinase (GTP), ec:1.2.1.3 - dehydrogenase (NAD+), ec:1.1.1.79 - reductase (NADP+), ec:1.2.4.1 - dehydrogenase (acetyl-transferring), ec:6.4.1.2 - carboxylase, ec:2.3.1.12 - acetyltransferase, ec:1.8.1.4 - dehydrogenase, ec:2.3.1.9 - C-acetyltransferase, ec:1.1.2.4 - dehydrogenase (cytochrome), ec:1.1.1.40 - dehydrogenase (oxaloacetate-decarboxylating) (NADP+), ec:1.1.1.37 - de…	2122	2.64766	0.848256	1.1401e-05
Purine metabolism	10	map00230	ec:3.6.1.15 - phosphatase, ec:2.7.4.3 - kinase, ec:3.1.3.5 - uridine 5'-nucleotidase, ec:3.6.1.3 - adenylpyrophosphatase, ec:2.7.7.4 - adenylyltransferase, ec:5.4.2.2 - (alpha-D-glucose-1,6-bisphosphate-dependent), ec:2.7.7.6 - RNA polymerase, ec:2.7.7.7 - DNA polymerase, ec:2.7.7.8 - nucleotidyltransferase, ec:2.7.1.40 - kinase	491	16	ec:3.6.1.15 - phosphatase, ec:2.7.7.7 - DNA polymerase, ec:2.7.4.3 - kinase, ec:3.6.1.9 - diphosphatase, ec:2.7.7.8 - nucleotidyltransferase, ec:3.6.1.3 - adenylpyrophosphatase, ec:2.7.4.6 - kinase, ec:2.7.7.4 - adenylyltransferase, ec:2.7.4.10 - kinase, ec:6.3.3.1 - cyclo-ligase, ec:3.6.1.5 - ATP-diphosphatase, ec:3.1.3.5 - uridine 5'-nucleotidase, ec:5.4.2.2 - (alpha-D-glucose-1,6-bisphosphate-…	2122	2.03666	0.754006	0.000694537
Glycolysis / Gluconeogenesis	10	map00010	ec:4.1.1.1 - decarboxylase, ec:5.3.1.1 - isomerase, ec:4.1.2.13 - aldolase, ec:1.1.1.1 - dehydrogenase, ec:2.3.1.12 - acetyltransferase, ec:4.1.1.32 - carboxykinase (GTP), ec:5.4.2.2 - (alpha-D-glucose-1,6-bisphosphate-dependent), ec:2.7.1.40 - kinase, ec:2.7.1.1 - hexokinase type IV glucokinase, ec:1.2.1.9 - dehydrogenase (NADP+)	491	18	ec:4.1.1.32 - carboxykinase (GTP), ec:1.2.1.3 - dehydrogenase (NAD+), ec:1.2.4.1 - dehydrogenase (acetyl-transferring), ec:4.1.1.1 - decarboxylase, ec:2.3.1.12 - acetyltransferase, ec:5.1.3.15 - 1-epimerase, ec:2.7.2.3 - kinase, ec:1.8.1.4 - dehydrogenase, ec:2.7.1.1 - hexokinase type IV glucokinase, ec:1.2.1.12 - dehydrogenase (phosphorylating), ec:4.2.1.11 - hydratase, ec:1.1.1.1 - dehydrogenas…	2122	2.03666	0.848256	0.00225922
Thiamine metabolism	4	map00730	ec:2.5.1.3 - phosphate synthase, ec:3.6.1.15 - phosphatase, ec:2.7.4.3 - kinase, ec:3.1.3.2 - phosphatase	491	4	ec:3.6.1.15 - phosphatase, ec:2.5.1.3 - phosphate synthase, ec:2.7.4.3 - kinase, ec:3.1.3.2 - phosphatase	2122	0.814664	0.188501	0.00283958
Glyoxylate and dicarboxylate metabolism	8	map00630	ec:2.1.2.1 - hydroxymethyltransferase, ec:1.1.1.37 - dehydrogenase, ec:6.3.1.2 - synthetase, ec:1.1.99.14 - dehydrogenase, ec:1.1.1.79 - reductase (NADP+), ec:1.1.3.15 - oxidase, ec:1.1.1.81 - reductase, ec:3.5.1.9 - kynurenine formamidase	491	14	ec:3.5.1.9 - kynurenine formamidase, ec:1.1.1.79 - reductase (NADP+), ec:4.1.1.39 - carboxylase, ec:4.1.1.8 - decarboxylase, ec:2.3.1.9 - C-acetyltransferase, ec:1.1.1.37 - dehydrogenase, ec:1.1.99.14 - dehydrogenase, ec:1.11.1.6 - equilase, ec:2.1.2.1 - hydroxymethyltransferase, ec:4.2.1.3 - hydratase, ec:1.1.1.81 - reductase, ec:6.3.1.2 - synthetase, ec:1.1.3.15 - oxidase, ec:2.3.3.1 - (Si)-syn…	2122	1.62933	0.659755	0.00496898
Oxidative phosphorylation	4	map00190	ec:1.9.3.1 - oxidase, ec:1.6.99.3 - dehydrogenase, ec:1.6.5.3 - reductase (H+-translocating), ec:3.6.3.6 - ATPase	491	5	ec:3.6.1.1 - diphosphatase, ec:1.3.5.1 - dehydrogenase, ec:1.9.3.1 - oxidase, ec:1.10.2.2 - reductase, ec:1.6.99.3 - dehydrogenase	2122	0.814664	0.235627	0.0109333
Steroid hormone biosynthesis	4	map00140	ec:1.3.99.6 - 4-dehydrogenase, ec:1.3.1.3 - 5beta-reductase, ec:1.1.1.145 - dehydrogenase, ec:2.4.1.17 - 1-naphthol glucuronyltransferase	491	5	ec:1.1.1.145 - dehydrogenase, ec:1.3.1.3 - 5beta-reductase, ec:2.4.1.17 - 1-naphthol glucuronyltransferase, ec:1.3.99.6 - 4-dehydrogenase, ec:1.14.14.1 - monooxygenase	2122	0.814664	0.235627	0.0109333
Galactose metabolism	5	map00052	ec:5.4.2.2 - (alpha-D-glucose-1,6-bisphosphate-dependent), ec:3.2.1.20 - maltase, ec:3.2.1.26 - invertase, ec:3.2.1.23 - lactase (ambiguous), ec:2.7.1.1 - hexokinase type IV glucokinase	491	8	ec:3.2.1.26 - invertase, ec:2.7.7.64 - uridylyltransferase, ec:3.2.1.20 - maltase, ec:2.7.1.1 - hexokinase type IV glucokinase, ec:2.7.7.9 - uridylyltransferase, ec:3.2.1.23 - lactase (ambiguous), ec:3.2.1.22 - melibiase, ec:5.4.2.2 - (alpha-D-glucose-1,6-bisphosphate-dependent)	2122	1.01833	0.377003	0.0167132
Drug metabolism - other enzymes	5	map00983	ec:2.3.1.5 - N-acetyltransferase, ec:2.5.1.18 - transferase, ec:2.7.1.48 - kinase, ec:3.1.1.1 - ali-esterase, ec:2.4.1.17 - 1-naphthol glucuronyltransferase	491	8	ec:2.7.1.21 - kinase, ec:2.7.1.48 - kinase, ec:3.1.1.1 - ali-esterase, ec:2.7.4.6 - kinase, ec:3.2.1.31 - beta-glucuronide glucuronohydrolase glucuronidase, ec:2.5.1.18 - transferase, ec:2.3.1.5 - N-acetyltransferase, ec:2.4.1.17 - 1-naphthol glucuronyltransferase	2122	1.01833	0.377003	0.0167132
Pyrimidine metabolism	5	map00240	ec:3.1.3.5 - uridine 5'-nucleotidase, ec:2.7.7.6 - RNA polymerase, ec:2.7.7.7 - DNA polymerase, ec:2.7.7.8 - nucleotidyltransferase, ec:2.7.1.48 - kinase	491	8	ec:5.4.3.8 - 2,1-aminomutase, ec:1.2.1.70 - reductase, ec:4.2.1.75 - synthase, ec:1.3.3.3 - oxidase, ec:3.2.1.31 - beta-glucuronide glucuronohydrolase glucuronidase, ec:1.14.13.81 - IX monomethyl ester (oxidative) cyclase, ec:1.16.3.1 - ceruloplasmin, ec:2.4.1.17 - 1-naphthol glucuronyltransferase	2122	1.01833	0.377003	0.0167132
Arginine biosynthesis	5	map00220	ec:2.3.1.1 - N-acetyltransferase, ec:3.5.3.1 - arginine amidinase, ec:6.3.1.2 - synthetase, ec:1.4.1.3 - dehydrogenase [NAD(P)+], ec:1.4.1.2 - dehydrogenase	491	8	ec:2.3.1.1 - N-acetyltransferase, ec:3.5.1.14 - acid amidohydrolase, ec:2.6.1.1 - transaminase, ec:3.5.3.1 - arginine amidinase, ec:1.4.1.2 - dehydrogenase, ec:1.4.1.3 - dehydrogenase [NAD(P)+], ec:6.3.1.2 - synthetase, ec:1.4.1.4 - dehydrogenase (NADP+)	2122	1.01833	0.377003	0.0167132
Pentose phosphate pathway	5	map00030	ec:4.1.2.13 - aldolase, ec:1.1.1.44 - dehydrogenase (NADP+-dependent, decarboxylating), ec:1.1.1.43 - 2-dehydrogenase, ec:5.4.2.2 - (alpha-D-glucose-1,6-bisphosphate-dependent), ec:1.2.1.9 - dehydrogenase (NADP+)	491	8	ec:1.1.1.44 - dehydrogenase (NADP+-dependent, decarboxylating), ec:5.3.1.6 - isomerase, ec:3.1.1.31 - phosphogluconolactonase, ec:2.2.1.1 - glycolaldehydetransferase, ec:5.4.2.2 - (alpha-D-glucose-1,6-bisphosphate-dependent), ec:4.1.2.13 - aldolase, ec:1.1.1.49 - dehydrogenase (NADP+), ec:2.2.1.2 - dihydroxyacetonetransferase	2122	1.01833	0.377003	0.0167132
Amino sugar and nucleotide sugar metabolism	7	map00520	ec:5.3.1.8 - isomerase, ec:4.1.1.35 - decarboxylase, ec:5.4.99.30 - mutase, ec:5.4.2.2 - (alpha-D-glucose-1,6-bisphosphate-dependent), ec:1.1.1.22 - 6-dehydrogenase, ec:2.7.7.27 - adenylyltransferase, ec:2.7.1.1 - hexokinase type IV glucokinase	491	14	ec:3.2.1.55 - end alpha-L-arabinofuranosidase, ec:2.7.7.64 - uridylyltransferase, ec:5.4.99.30 - mutase, ec:2.7.7.27 - adenylyltransferase, ec:2.7.1.1 - hexokinase type IV glucokinase, ec:2.7.7.9 - uridylyltransferase, ec:4.2.1.76 - 4,6-dehydratase, ec:4.1.1.35 - decarboxylase, ec:5.4.2.8 - mannose phosphomutase, ec:3.2.1.52 - hexosaminidase, ec:5.4.2.2 - (alpha-D-glucose-1,6-bisphosphate-depende…	2122	1.42566	0.659755	0.0190664
Biosynthesis of antibiotics	25	map01130	ec:1.1.1.183 - dehydrogenase (NADP+), ec:2.1.2.1 - hydroxymethyltransferase, ec:4.1.1.1 - decarboxylase, ec:5.3.1.1 - isomerase, ec:5.3.1.8 - isomerase, ec:4.1.2.13 - aldolase, ec:2.7.4.3 - kinase, ec:2.3.1.1 - N-acetyltransferase, ec:1.1.1.37 - dehydrogenase, ec:1.1.1.1 - dehydrogenase, ec:2.3.1.12 - acetyltransferase, ec:4.1.1.32 - carboxykinase (GTP), ec:1.1.1.44 - dehydrogenase (NADP+-depende…	491	82	ec:1.1.1.34 - reductase (NADPH), ec:2.7.2.11 - 5-kinase, ec:2.3.1.1 - N-acetyltransferase, ec:3.5.1.14 - acid amidohydrolase, ec:1.3.5.1 - dehydrogenase, ec:4.1.1.32 - carboxykinase (GTP), ec:1.2.1.3 - dehydrogenase (NAD+), ec:1.5.1.2 - reductase, ec:4.1.1.39 - carboxylase, ec:1.2.4.1 - dehydrogenase (acetyl-transferring), ec:4.1.1.1 - decarboxylase, ec:6.4.1.2 - carboxylase, ec:1.1.1.183 - dehyd…	2122	5.09165	3.86428	0.028916
Starch and sucrose metabolism	9	map00500	ec:3.2.1.48 - alpha-glucosidase, ec:5.4.2.2 - (alpha-D-glucose-1,6-bisphosphate-dependent), ec:3.2.1.20 - maltase, ec:3.2.1.21 - gentiobiase, ec:3.2.1.26 - invertase, ec:2.7.7.27 - adenylyltransferase, ec:3.2.1.39 - endo-1,3-beta-D-glucosidase, ec:2.4.1.13 - synthase, ec:2.7.1.1 - hexokinase type IV glucokinase	491	23	ec:3.2.1.4 - endo-1,4-beta-D-glucanase, ec:2.4.1.13 - synthase, ec:3.2.1.26 - invertase, ec:3.6.1.9 - diphosphatase, ec:2.4.1.34 - synthase, ec:2.4.1.14 - synthase, ec:3.2.1.20 - maltase, ec:2.7.7.27 - adenylyltransferase, ec:2.7.1.1 - hexokinase type IV glucokinase, ec:2.7.7.9 - uridylyltransferase, ec:2.4.1.1 - phosphorylase, ec:2.4.1.25 - disproportionating enzyme, ec:3.2.1.21 - gentiobiase, e…	2122	1.83299	1.08388	0.0386283
Nitrogen metabolism	4	map00910	ec:4.2.1.1 - anhydrase, ec:6.3.1.2 - synthetase, ec:1.4.1.3 - dehydrogenase [NAD(P)+], ec:1.4.1.2 - dehydrogenase	491	7	ec:1.4.1.14 - synthase (NADH), ec:4.2.1.1 - anhydrase, ec:1.4.1.2 - dehydrogenase, ec:4.2.1.104 - cyanate lyase, ec:1.4.1.3 - dehydrogenase [NAD(P)+], ec:6.3.1.2 - synthetase, ec:1.4.1.4 - dehydrogenase (NADP+)	2122	0.814664	0.329877	0.0453651
Cyanoamino acid metabolism	2	map00460	ec:2.1.2.1 - hydroxymethyltransferase, ec:3.2.1.21 - gentiobiase	491	2	ec:3.2.1.21 - gentiobiase, ec:2.1.2.1 - hydroxymethyltransferase	2122	0.407332	0.0942507	0.0534554
Pentose and glucuronate interconversions	4	map00040	ec:3.1.1.11 - pectin demethoxylase, ec:1.1.1.22 - 6-dehydrogenase, ec:2.4.1.17 - 1-naphthol glucuronyltransferase, ec:3.2.1.15 - pectin depolymerase	491	8	ec:3.2.1.15 - pectin depolymerase, ec:2.7.7.64 - uridylyltransferase, ec:5.3.1.5 - isomerase, ec:2.7.7.9 - uridylyltransferase, ec:3.2.1.31 - beta-glucuronide glucuronohydrolase glucuronidase, ec:3.2.1.67 - 1,4-alpha-galacturonidase, ec:3.1.1.11 - pectin demethoxylase, ec:2.4.1.17 - 1-naphthol glucuronyltransferase	2122	0.814664	0.377003	0.0698386
Carbon fixation in photosynthetic organisms	6	map00710	ec:5.3.1.1 - isomerase, ec:4.1.2.13 - aldolase, ec:1.1.1.37 - dehydrogenase, ec:1.1.1.39 - dehydrogenase (decarboxylating), ec:4.1.1.31 - carboxylase, ec:1.1.1.40 - dehydrogenase (oxaloacetate-decarboxylating) (NADP+)	491	15	ec:4.1.1.39 - carboxylase, ec:2.6.1.1 - transaminase, ec:2.7.2.3 - kinase, ec:1.2.1.12 - dehydrogenase (phosphorylating), ec:1.1.1.40 - dehydrogenase (oxaloacetate-decarboxylating) (NADP+), ec:3.1.3.37 - SBPase, ec:1.1.1.37 - dehydrogenase, ec:5.3.1.6 - isomerase, ec:1.2.1.13 - dehydrogenase (NADP+) (phosphorylating), ec:1.2.1.59 - dehydrogenase (NAD(P)+) (phosphorylating), ec:2.2.1.1 - glycolald…	2122	1.222	0.70688	0.0716831
Metabolism of xenobiotics by cytochrome P450	3	map00980	ec:2.5.1.18 - transferase, ec:1.1.1.1 - dehydrogenase, ec:2.4.1.17 - 1-naphthol glucuronyltransferase	491	5	ec:1.1.1.1 - dehydrogenase, ec:2.5.1.18 - transferase, ec:3.3.2.9 - epoxide hydrolase, ec:2.4.1.17 - 1-naphthol glucuronyltransferase, ec:1.14.14.1 - monooxygenase	2122	0.610998	0.235627	0.0730381
Drug metabolism - cytochrome P450	3	map00982	ec:2.5.1.18 - transferase, ec:1.1.1.1 - dehydrogenase, ec:2.4.1.17 - 1-naphthol glucuronyltransferase	491	5	ec:1.1.1.1 - dehydrogenase, ec:1.14.13.8 - monooxygenase, ec:2.5.1.18 - transferase, ec:2.4.1.17 - 1-naphthol glucuronyltransferase, ec:1.14.14.1 - monooxygenase	2122	0.610998	0.235627	0.0730381
Phenylpropanoid biosynthesis	4	map00940	ec:1.1.1.195 - dehydrogenase, ec:2.1.1.68 - O-methyltransferase, ec:3.2.1.21 - gentiobiase, ec:1.11.1.7 - lactoperoxidase	491	9	ec:1.1.1.195 - dehydrogenase, ec:3.2.1.21 - gentiobiase, ec:2.3.1.133 - O-hydroxycinnamoyltransferase, ec:4.3.1.24 - ammonia-lyase, ec:2.1.1.68 - O-methyltransferase, ec:6.2.1.12 - ligase, ec:1.11.1.7 - lactoperoxidase, ec:2.1.1.104 - O-methyltransferase, ec:4.3.1.25 - ammonia-lyase	2122	0.814664	0.424128	0.0967499
Phenylalanine, tyrosine and tryptophan biosynthesis	3	map00400	ec:1.3.1.78 - dehydrogenase (NADP+), ec:1.3.1.13 - dehydrogenase (NADP+), ec:1.3.1.12 - dehydrogenase	491	6	ec:2.6.1.1 - transaminase, ec:2.5.1.54 - synthase, ec:4.2.1.20 - synthase, ec:4.1.3.27 - synthase, ec:2.5.1.19 - 1-carboxyvinyltransferase, ec:5.4.99.5 - mutase	2122	0.610998	0.282752	0.112403
Ascorbate and aldarate metabolism	3	map00053	ec:1.6.5.4 - reductase (NADH), ec:1.1.1.22 - 6-dehydrogenase, ec:2.4.1.17 - 1-naphthol glucuronyltransferase	491	6	ec:1.2.1.3 - dehydrogenase (NAD+), ec:2.7.7.64 - uridylyltransferase, ec:1.6.5.4 - reductase (NADH), ec:4.1.2.20 - aldolase, ec:2.4.1.17 - 1-naphthol glucuronyltransferase, ec:1.10.3.3 - oxidase	2122	0.610998	0.282752	0.112403
Selenocompound metabolism	2	map00450	ec:2.7.7.4 - adenylyltransferase, ec:2.1.1.14 - S-methyltransferase	491	3	ec:1.8.1.9 - reductase, ec:2.1.1.14 - S-methyltransferase, ec:2.7.7.4 - adenylyltransferase	2122	0.407332	0.141376	0.123376
Aminobenzoate degradation	2	map00627	ec:3.1.3.41 - nitrophenyl phosphatase, ec:4.2.1.17 - hydratase	491	3	ec:4.2.1.17 - hydratase, ec:3.1.3.41 - nitrophenyl phosphatase, ec:1.14.14.1 - monooxygenase	2122	0.407332	0.141376	0.123376
Flavone and flavonol biosynthesis	2	map00944	ec:2.1.1.42 - 3'-O-methyltransferase, ec:2.1.1.76 - 3-O-methyltransferase	491	3	ec:3.2.1.31 - beta-glucuronide glucuronohydrolase glucuronidase, ec:2.1.1.76 - 3-O-methyltransferase, ec:2.1.1.42 - 3'-O-methyltransferase	2122	0.407332	0.141376	0.123376
Diterpenoid biosynthesis	2	map00904	ec:1.14.11.13 - 2beta-dioxygenase, ec:4.2.3.19 - synthase	491	3	ec:5.5.1.13 - diphosphate synthase, ec:4.2.3.19 - synthase, ec:1.14.11.13 - 2beta-dioxygenase	2122	0.407332	0.141376	0.123376
Cutin, suberine and wax biosynthesis	2	map00073	ec:2.3.1.75 - O-fatty-acyltransferase, ec:2.3.1.20 - O-acyltransferase	491	3	ec:2.3.1.20 - O-acyltransferase, ec:2.3.1.75 - O-fatty-acyltransferase, ec:1.2.1.84 - fatty acyl-CoA reductase	2122	0.407332	0.141376	0.123376
Streptomycin biosynthesis	2	map00521	ec:5.4.2.2 - (alpha-D-glucose-1,6-bisphosphate-dependent), ec:2.7.1.1 - hexokinase type IV glucokinase	491	3	ec:4.2.1.46 - 4,6-dehydratase, ec:2.7.1.1 - hexokinase type IV glucokinase, ec:5.4.2.2 - (alpha-D-glucose-1,6-bisphosphate-dependent)	2122	0.407332	0.141376	0.123376
Fructose and mannose metabolism	4	map00051	ec:5.3.1.1 - isomerase, ec:5.3.1.8 - isomerase, ec:4.1.2.13 - aldolase, ec:2.7.1.1 - hexokinase type IV glucokinase	491	10	ec:4.1.2.53 - aldolase, ec:5.3.1.5 - isomerase, ec:2.7.1.1 - hexokinase type IV glucokinase, ec:3.2.1.80 - beta-fructosidase, ec:5.3.1.6 - isomerase, ec:5.4.2.8 - mannose phosphomutase, ec:5.3.1.1 - isomerase, ec:4.1.2.13 - aldolase, ec:5.3.1.8 - isomerase, ec:2.7.1.4 - fructokinase (phosphorylating)	2122	0.814664	0.471254	0.124085
Methane metabolism	4	map00680	ec:2.1.2.1 - hydroxymethyltransferase, ec:4.1.2.13 - aldolase, ec:1.1.1.37 - dehydrogenase, ec:4.1.1.31 - carboxylase	491	10	ec:4.2.1.11 - hydratase, ec:1.1.1.37 - dehydrogenase, ec:1.1.1.95 - dehydrogenase, ec:1.12.98.1 - F420 hydrogenase, ec:3.1.3.3 - phosphatase, ec:2.1.2.1 - hydroxymethyltransferase, ec:1.1.1.284 - dehydrogenase, ec:3.1.2.12 - hydrolase, ec:4.1.1.31 - carboxylase, ec:4.1.2.13 - aldolase	2122	0.814664	0.471254	0.124085
Citrate cycle (TCA cycle)	5	map00020	ec:1.1.1.37 - dehydrogenase, ec:2.3.1.12 - acetyltransferase, ec:4.1.1.32 - carboxykinase (GTP), ec:1.1.1.41 - dehydrogenase (NAD+), ec:1.2.4.2 - dehydrogenase (succinyl-transferring)	491	14	ec:1.3.5.1 - dehydrogenase, ec:4.1.1.32 - carboxykinase (GTP), ec:1.2.4.1 - dehydrogenase (acetyl-transferring), ec:2.3.1.12 - acetyltransferase, ec:2.3.3.8 - citrate synthase, ec:1.2.4.2 - dehydrogenase (succinyl-transferring), ec:1.8.1.4 - dehydrogenase, ec:1.1.1.37 - dehydrogenase, ec:1.1.1.41 - dehydrogenase (NAD+), ec:4.2.1.3 - hydratase, ec:6.2.1.4 - ligase (GDP-forming), ec:1.1.1.42 - dehy…	2122	1.01833	0.659755	0.124369
Glutathione metabolism	4	map00480	ec:2.5.1.18 - transferase, ec:1.1.1.44 - dehydrogenase (NADP+-dependent, decarboxylating), ec:1.1.1.43 - 2-dehydrogenase, ec:3.4.19.13 - hydrolase	491	11	ec:3.4.19.13 - hydrolase, ec:1.11.1.12 - glutathione peroxidase, ec:1.1.1.44 - dehydrogenase (NADP+-dependent, decarboxylating), ec:1.11.1.9 - peroxidase, ec:6.3.2.2 - ligase, ec:4.3.2.9 - gamma-glutamyl-amino acid cyclotransferase, ec:2.5.1.18 - transferase, ec:1.11.1.15 - thioredoxin peroxidase, ec:1.1.1.42 - dehydrogenase (NADP+), ec:1.1.1.49 - dehydrogenase (NADP+), ec:1.8.1.7 - reductase	2122	0.814664	0.518379	0.150029
Porphyrin and chlorophyll metabolism	4	map00860	ec:1.14.13.81 - IX monomethyl ester (oxidative) cyclase, ec:2.4.1.17 - 1-naphthol glucuronyltransferase, ec:1.3.3.5 - oxidase, ec:1.16.3.1 - ceruloplasmin	491	11	ec:2.7.7.7 - DNA polymerase, ec:2.7.1.21 - kinase, ec:2.7.1.48 - kinase, ec:3.6.1.9 - diphosphatase, ec:2.7.7.8 - nucleotidyltransferase, ec:6.3.4.2 - synthase (glutamine hydrolysing), ec:2.1.3.2 - carbamoyltransferase, ec:2.7.4.6 - kinase, ec:3.6.1.5 - ATP-diphosphatase, ec:3.1.3.5 - uridine 5'-nucleotidase, ec:2.7.7.6 - RNA polymerase	2122	0.814664	0.518379	0.150029
Glycerophospholipid metabolism	4	map00564	ec:3.1.1.5 - lecithinase B, ec:2.3.1.51 - O-acyltransferase, ec:2.3.1.43 - O-acyltransferase, ec:3.1.4.4 - D	491	11	ec:3.1.4.4 - D, ec:2.3.1.51 - O-acyltransferase, ec:1.1.1.94 - dehydrogenase [NAD(P)+], ec:2.3.1.43 - O-acyltransferase, ec:1.1.1.8 - dehydrogenase (NAD+), ec:2.3.1.15 - 1-O-acyltransferase, ec:2.1.1.103 - N-methyltransferase, ec:3.1.1.5 - lecithinase B, ec:3.1.4.3 - C, ec:3.1.1.4 - A2, ec:3.1.1.32 - A1	2122	0.814664	0.518379	0.150029
Retinol metabolism	2	map00830	ec:1.1.1.1 - dehydrogenase, ec:2.4.1.17 - 1-naphthol glucuronyltransferase	491	4	ec:1.2.1.36 - dehydrogenase, ec:1.1.1.1 - dehydrogenase, ec:2.4.1.17 - 1-naphthol glucuronyltransferase, ec:1.14.14.1 - monooxygenase	2122	0.407332	0.188501	0.189809
Geraniol degradation	2	map00281	ec:1.1.1.183 - dehydrogenase (NADP+), ec:4.2.1.17 - hydratase	491	4	ec:1.1.1.183 - dehydrogenase (NADP+), ec:1.1.1.35 - dehydrogenase, ec:4.2.1.17 - hydratase, ec:2.3.1.16 - C-acyltransferase	2122	0.407332	0.188501	0.189809
Tryptophan metabolism	3	map00380	ec:1.2.4.2 - dehydrogenase (succinyl-transferring), ec:4.2.1.17 - hydratase, ec:3.5.1.9 - kynurenine formamidase	491	9	ec:3.5.1.9 - kynurenine formamidase, ec:1.2.1.3 - dehydrogenase (NAD+), ec:1.1.1.35 - dehydrogenase, ec:1.2.4.2 - dehydrogenase (succinyl-transferring), ec:2.3.1.9 - C-acetyltransferase, ec:4.2.1.17 - hydratase, ec:1.11.1.6 - equilase, ec:4.1.1.28 - decarboxylase, ec:1.14.14.1 - monooxygenase	2122	0.610998	0.424128	0.214912
alpha-Linolenic acid metabolism	3	map00592	ec:1.1.1.1 - dehydrogenase, ec:1.13.11.12 - 13S-lipoxygenase, ec:4.2.1.17 - hydratase	491	9	ec:4.2.1.92 - dehydratase, ec:1.3.1.42 - reductase, ec:5.3.99.6 - cyclase, ec:1.1.1.1 - dehydrogenase, ec:4.2.1.17 - hydratase, ec:1.13.11.12 - 13S-lipoxygenase, ec:3.1.1.4 - A2, ec:2.3.1.16 - C-acyltransferase, ec:3.1.1.32 - A1	2122	0.610998	0.424128	0.214912
Glycine, serine and threonine metabolism	3	map00260	ec:2.1.2.1 - hydroxymethyltransferase, ec:1.1.1.1 - dehydrogenase, ec:1.1.1.81 - reductase	491	9	ec:1.8.1.4 - dehydrogenase, ec:1.1.1.1 - dehydrogenase, ec:4.2.1.20 - synthase, ec:4.3.1.19 - ammonia-lyase, ec:1.1.1.95 - dehydrogenase, ec:1.4.3.21 - oxidase, ec:3.1.3.3 - phosphatase, ec:2.1.2.1 - hydroxymethyltransferase, ec:1.1.1.81 - reductase	2122	0.610998	0.424128	0.214912
Cysteine and methionine metabolism	2	map00270	ec:1.1.1.37 - dehydrogenase, ec:2.1.1.14 - S-methyltransferase	491	13	ec:3.3.1.1 - S-adenosylhomocysteine synthase, ec:2.1.1.14 - S-methyltransferase, ec:2.6.1.1 - transaminase, ec:3.2.2.9 - nucleosidase, ec:6.3.2.2 - ligase, ec:1.1.1.37 - dehydrogenase, ec:1.1.1.27 - dehydrogenase, ec:2.5.1.47 - synthase, ec:2.5.1.6 - adenosyltransferase, ec:2.1.1.37 - (cytosine-5-)-methyltransferase, ec:5.3.1.23 - isomerase, ec:2.8.1.2 - sulfurtransferase, ec:2.3.1.30 - O-acetylt…	2122	0.407332	0.61263	0.231203
Neomycin, kanamycin and gentamicin biosynthesis	1	map00524	ec:2.7.1.1 - hexokinase type IV glucokinase	491	1	ec:2.7.1.1 - hexokinase type IV glucokinase	2122	0.203666	0.0471254	0.231385
Monobactam biosynthesis	1	map00261	ec:2.7.7.4 - adenylyltransferase	491	1	ec:2.7.7.4 - adenylyltransferase	2122	0.203666	0.0471254	0.231385
Steroid degradation	1	map00984	ec:1.1.1.145 - dehydrogenase	491	1	ec:1.1.1.145 - dehydrogenase	2122	0.203666	0.0471254	0.231385
Fluorobenzoate degradation	1	map00364	ec:3.1.1.45 - maleylacetate enol-lactonase	491	1	ec:3.1.1.45 - maleylacetate enol-lactonase	2122	0.203666	0.0471254	0.231385
Nitrotoluene degradation	1	map00633	ec:2.3.1.5 - N-acetyltransferase	491	1	ec:2.3.1.5 - N-acetyltransferase	2122	0.203666	0.0471254	0.231385
mTOR signaling pathway	1	map04150	ec:2.7.11.24 - protein kinase	491	1	ec:2.7.11.24 - protein kinase	2122	0.203666	0.0471254	0.231385
Novobiocin biosynthesis	1	map00401	ec:1.3.1.12 - dehydrogenase	491	1	ec:2.6.1.1 - transaminase	2122	0.203666	0.0471254	0.231385
Taurine and hypotaurine metabolism	1	map00430	ec:1.4.1.2 - dehydrogenase	491	1	ec:1.4.1.2 - dehydrogenase	2122	0.203666	0.0471254	0.231385
Sesquiterpenoid and triterpenoid biosynthesis	1	map00909	ec:4.2.3.23 - synthase	491	1	ec:4.2.3.23 - synthase	2122	0.203666	0.0471254	0.231385
Naphthalene degradation	1	map00626	ec:1.1.1.1 - dehydrogenase	491	1	ec:1.1.1.1 - dehydrogenase	2122	0.203666	0.0471254	0.231385
One carbon pool by folate	1	map00670	ec:2.1.2.1 - hydroxymethyltransferase	491	1	ec:2.1.2.1 - hydroxymethyltransferase	2122	0.203666	0.0471254	0.231385
D-Glutamine and D-glutamate metabolism	1	map00471	ec:1.4.1.3 - dehydrogenase [NAD(P)+]	491	1	ec:1.4.1.3 - dehydrogenase [NAD(P)+]	2122	0.203666	0.0471254	0.231385
Chlorocyclohexane and chlorobenzene degradation	1	map00361	ec:3.1.1.45 - maleylacetate enol-lactonase	491	1	ec:3.1.1.45 - maleylacetate enol-lactonase	2122	0.203666	0.0471254	0.231385
Sphingolipid metabolism	2	map00600	ec:2.4.1.80 - glucosyltransferase, ec:3.2.1.23 - lactase (ambiguous)	491	5	ec:3.5.1.23 - acylsphingosine deacylase, ec:4.1.2.27 - aldolase, ec:3.2.1.23 - lactase (ambiguous), ec:3.2.1.22 - melibiase, ec:2.4.1.80 - glucosyltransferase	2122	0.407332	0.235627	0.243311
Alanine, aspartate and glutamate metabolism	3	map00250	ec:6.3.1.2 - synthetase, ec:1.4.1.3 - dehydrogenase [NAD(P)+], ec:1.4.1.2 - dehydrogenase	491	11	ec:3.5.1.111 - amidase, ec:1.4.1.14 - synthase (NADH), ec:2.6.1.1 - transaminase, ec:2.1.3.2 - carbamoyltransferase, ec:1.4.1.2 - dehydrogenase, ec:1.4.1.3 - dehydrogenase [NAD(P)+], ec:6.3.5.4 - synthase (glutamine-hydrolysing), ec:6.3.1.2 - synthetase, ec:3.5.1.3 - alpha-keto acid-omega-amidase, ec:1.2.1.16 - dehydrogenase [NAD(P)+], ec:1.4.1.4 - dehydrogenase (NADP+)	2122	0.610998	0.518379	0.249638
Carbon fixation pathways in prokaryotes	3	map00720	ec:1.1.1.37 - dehydrogenase, ec:4.1.1.31 - carboxylase, ec:4.2.1.17 - hydratase	491	11	ec:1.3.5.1 - dehydrogenase, ec:6.4.1.2 - carboxylase, ec:1.1.1.35 - dehydrogenase, ec:2.3.3.8 - citrate synthase, ec:2.3.1.9 - C-acetyltransferase, ec:1.1.1.37 - dehydrogenase, ec:4.2.1.17 - hydratase, ec:4.2.1.3 - hydratase, ec:1.1.1.42 - dehydrogenase (NADP+), ec:4.1.1.31 - carboxylase, ec:6.2.1.5 - ligase (ADP-forming)	2122	0.610998	0.518379	0.249638
Propanoate metabolism	1	map00640	ec:4.2.1.17 - hydratase	491	9	ec:3.1.2.4 - hydrolase, ec:1.2.1.27 - dehydrogenase (CoA-acylating), ec:6.4.1.2 - carboxylase, ec:1.8.1.4 - dehydrogenase, ec:2.3.1.9 - C-acetyltransferase, ec:4.2.1.17 - hydratase, ec:1.1.1.27 - dehydrogenase, ec:6.2.1.4 - ligase (GDP-forming), ec:6.2.1.5 - ligase (ADP-forming)	2122	0.203666	0.424128	0.253605
Valine, leucine and isoleucine degradation	2	map00280	ec:4.2.1.18 - hydratase, ec:4.2.1.17 - hydratase	491	11	ec:1.2.1.3 - dehydrogenase (NAD+), ec:3.1.2.4 - hydrolase, ec:1.2.1.27 - dehydrogenase (CoA-acylating), ec:1.1.1.35 - dehydrogenase, ec:1.8.1.4 - dehydrogenase, ec:2.3.1.9 - C-acetyltransferase, ec:6.4.1.4 - carboxylase, ec:4.2.1.17 - hydratase, ec:1.1.1.31 - dehydrogenase, ec:4.2.1.18 - hydratase, ec:2.3.1.16 - C-acyltransferase	2122	0.407332	0.518379	0.276184
Lysine degradation	2	map00310	ec:1.2.4.2 - dehydrogenase (succinyl-transferring), ec:4.2.1.17 - hydratase	491	6	ec:1.2.1.3 - dehydrogenase (NAD+), ec:1.1.1.35 - dehydrogenase, ec:1.2.4.2 - dehydrogenase (succinyl-transferring), ec:2.3.1.9 - C-acetyltransferase, ec:4.2.1.17 - hydratase, ec:2.1.1.43 - N-methyltransferase	2122	0.407332	0.282752	0.280664
Phenylalanine metabolism	1	map00360	ec:4.2.1.17 - hydratase	491	8	ec:2.6.1.1 - transaminase, ec:4.2.1.17 - hydratase, ec:1.4.3.21 - oxidase, ec:4.3.1.24 - ammonia-lyase, ec:6.2.1.12 - ligase, ec:2.1.1.104 - O-methyltransferase, ec:4.1.1.28 - decarboxylase, ec:4.3.1.25 - ammonia-lyase	2122	0.203666	0.377003	0.293443
Tyrosine metabolism	1	map00350	ec:1.1.1.1 - dehydrogenase	491	8	ec:4.1.1.68 - decarboxylase, ec:2.6.1.1 - transaminase, ec:1.1.1.1 - dehydrogenase, ec:1.10.3.1 - oxidase, ec:1.4.3.21 - oxidase, ec:4.1.1.28 - decarboxylase, ec:1.2.1.16 - dehydrogenase [NAD(P)+], ec:3.7.1.5 - hydrolase	2122	0.203666	0.377003	0.293443
Riboflavin metabolism	1	map00740	ec:3.1.3.2 - phosphatase	491	8	ec:2.5.1.78 - synthase, ec:1.1.1.193 - reductase, ec:3.5.4.26 - deaminase, ec:3.6.1.9 - diphosphatase, ec:2.7.7.2 - synthetase, ec:3.1.3.2 - phosphatase, ec:1.5.1.38 - reductase (NADPH), ec:1.5.1.39 - reductase [NAD(P)H]	2122	0.203666	0.377003	0.293443
Inositol phosphate metabolism	2	map00562	ec:5.3.1.1 - isomerase, ec:2.7.1.68 - 5-kinase	491	7	ec:3.1.4.11 - phospholipase C, ec:2.7.1.159 - 5/6-kinase, ec:2.7.1.68 - 5-kinase, ec:2.7.1.134 - 1-kinase, ec:3.1.4.3 - C, ec:5.3.1.1 - isomerase, ec:2.7.1.150 - 5-kinase	2122	0.407332	0.329877	0.302125
Fatty acid degradation	2	map00071	ec:1.1.1.1 - dehydrogenase, ec:4.2.1.17 - hydratase	491	9	ec:1.2.1.3 - dehydrogenase (NAD+), ec:4.2.1.74 - hydratase, ec:1.1.1.35 - dehydrogenase, ec:2.3.1.9 - C-acetyltransferase, ec:1.1.1.1 - dehydrogenase, ec:4.2.1.17 - hydratase, ec:6.2.1.3 - ligase, ec:2.3.1.16 - C-acyltransferase, ec:1.14.14.1 - monooxygenase	2122	0.407332	0.424128	0.306075
Arginine and proline metabolism	2	map00330	ec:3.5.3.11 - agmatine ureohydrolase, ec:3.5.3.1 - arginine amidinase	491	9	ec:2.7.2.11 - 5-kinase, ec:1.5.3.16 - oxidase, ec:1.2.1.3 - dehydrogenase (NAD+), ec:1.5.1.2 - reductase, ec:2.6.1.1 - transaminase, ec:1.5.3.17 - polyamine oxidase, ec:3.5.3.11 - agmatine ureohydrolase, ec:1.2.1.41 - dehydrogenase, ec:3.5.3.1 - arginine amidinase	2122	0.407332	0.424128	0.306075
Glycerolipid metabolism	2	map00561	ec:2.3.1.20 - O-acyltransferase, ec:2.3.1.51 - O-acyltransferase	491	9	ec:2.3.1.20 - O-acyltransferase, ec:1.2.1.3 - dehydrogenase (NAD+), ec:3.1.1.23 - lipase, ec:2.3.1.22 - O-acyltransferase, ec:2.3.1.51 - O-acyltransferase, ec:2.7.7.9 - uridylyltransferase, ec:3.1.1.3 - lipase, ec:2.3.1.15 - 1-O-acyltransferase, ec:3.2.1.22 - melibiase	2122	0.407332	0.424128	0.306075
Butanoate metabolism	1	map00650	ec:4.2.1.17 - hydratase	491	7	ec:1.3.5.1 - dehydrogenase, ec:1.1.1.35 - dehydrogenase, ec:2.2.1.6 - synthase, ec:2.3.1.9 - C-acetyltransferase, ec:1.1.1.30 - dehydrogenase, ec:4.2.1.17 - hydratase, ec:1.2.1.16 - dehydrogenase [NAD(P)+]	2122	0.203666	0.329877	0.334187
Caffeine metabolism	1	map00232	ec:2.3.1.5 - N-acetyltransferase	491	2	ec:2.3.1.5 - N-acetyltransferase, ec:1.14.14.1 - monooxygenase	2122	0.203666	0.0942507	0.35586
Toluene degradation	1	map00623	ec:3.1.1.45 - maleylacetate enol-lactonase	491	2	ec:1.1.1.35 - dehydrogenase, ec:3.1.1.45 - maleylacetate enol-lactonase	2122	0.203666	0.0942507	0.35586
Aminoacyl-tRNA biosynthesis	1	map00970	ec:6.1.1.6 - ligase	491	2	ec:6.1.1.22 - ligase, ec:6.1.1.6 - ligase	2122	0.203666	0.0942507	0.35586
Folate biosynthesis	1	map00790	ec:2.8.1.12 - synthase	491	2	ec:2.6.1.85 - synthase, ec:2.8.1.12 - synthase	2122	0.203666	0.0942507	0.35586
T cell receptor signaling pathway	1	map04660	ec:2.7.10.2 - protein-tyrosine kinase	491	2	ec:3.1.3.16 - phosphatase, ec:2.7.10.2 - protein-tyrosine kinase	2122	0.203666	0.0942507	0.35586
Caprolactam degradation	1	map00930	ec:4.2.1.17 - hydratase	491	2	ec:1.1.1.35 - dehydrogenase, ec:4.2.1.17 - hydratase	2122	0.203666	0.0942507	0.35586
Limonene and pinene degradation	1	map00903	ec:4.2.1.17 - hydratase	491	2	ec:1.2.1.3 - dehydrogenase (NAD+), ec:4.2.1.17 - hydratase	2122	0.203666	0.0942507	0.35586
beta-Alanine metabolism	1	map00410	ec:4.2.1.17 - hydratase	491	6	ec:1.5.3.16 - oxidase, ec:1.2.1.3 - dehydrogenase (NAD+), ec:3.1.2.4 - hydrolase, ec:1.5.3.17 - polyamine oxidase, ec:4.2.1.17 - hydratase, ec:1.4.3.21 - oxidase	2122	0.203666	0.282752	0.372767
Biosynthesis of unsaturated fatty acids	1	map01040	ec:4.2.1.17 - hydratase	491	5	ec:1.1.1.100 - reductase, ec:1.14.19.2 - 9-desaturase, ec:4.2.1.17 - hydratase, ec:2.3.1.16 - C-acyltransferase, ec:1.14.19.6 - (9+3)-desaturase	2122	0.203666	0.235627	0.404194
Sulfur metabolism	1	map00920	ec:2.7.7.4 - adenylyltransferase	491	5	ec:2.7.7.4 - adenylyltransferase, ec:2.5.1.47 - synthase, ec:2.8.1.1 - sulfurtransferase, ec:3.6.3.25 - ATPase, ec:2.3.1.30 - O-acetyltransferase	2122	0.203666	0.235627	0.404194
Pantothenate and CoA biosynthesis	1	map00770	ec:4.2.1.9 - dehydratase	491	5	ec:3.6.1.9 - diphosphatase, ec:2.2.1.6 - synthase, ec:2.7.1.33 - kinase, ec:1.1.1.86 - reductoisomerase (NADP+), ec:4.2.1.9 - dehydratase	2122	0.203666	0.235627	0.404194
Nicotinate and nicotinamide metabolism	1	map00760	ec:3.1.3.5 - uridine 5'-nucleotidase	491	5	ec:3.6.1.9 - diphosphatase, ec:2.7.1.23 - kinase, ec:2.1.1.7 - N-methyltransferase, ec:3.1.3.5 - uridine 5'-nucleotidase, ec:1.2.1.16 - dehydrogenase [NAD(P)+]	2122	0.203666	0.235627	0.404194
Benzoate degradation	1	map00362	ec:4.2.1.17 - hydratase	491	5	ec:1.1.1.35 - dehydrogenase, ec:2.3.1.9 - C-acetyltransferase, ec:4.1.3.17 - aldolase, ec:4.2.1.17 - hydratase, ec:2.3.1.16 - C-acyltransferase	2122	0.203666	0.235627	0.404194
Other glycan degradation	1	map00511	ec:3.2.1.23 - lactase (ambiguous)	491	5	ec:3.2.1.25 - mannanase, ec:3.2.1.51 - alpha-fucosidase, ec:3.2.1.23 - lactase (ambiguous), ec:3.2.1.52 - hexosaminidase, ec:3.2.1.24 - alpha-D-mannosidase	2122	0.203666	0.235627	0.404194
Fatty acid elongation	1	map00062	ec:4.2.1.17 - hydratase	491	3	ec:2.4.99.4 - alpha-2,3-sialyltransferase, ec:3.2.1.23 - lactase (ambiguous), ec:3.2.1.52 - hexosaminidase	2122	0.203666	0.141376	0.410414
Linoleic acid metabolism	1	map00591	ec:1.13.11.12 - 13S-lipoxygenase	491	3	ec:1.13.11.12 - 13S-lipoxygenase, ec:3.1.1.4 - A2, ec:1.14.14.1 - monooxygenase	2122	0.203666	0.141376	0.410414
Ether lipid metabolism	1	map00565	ec:3.1.4.4 - D	491	3	ec:3.1.4.4 - D, ec:3.1.4.3 - C, ec:3.1.1.4 - A2	2122	0.203666	0.141376	0.410414
Chloroalkane and chloroalkene degradation	1	map00625	ec:1.1.1.1 - dehydrogenase	491	3	ec:1.2.1.3 - dehydrogenase (NAD+), ec:1.1.1.1 - dehydrogenase, ec:3.3.2.10 - epoxide hydrolase	2122	0.203666	0.141376	0.410414
Primary bile acid biosynthesis	1	map00120	ec:1.3.1.3 - 5beta-reductase	491	3	ec:1.1.1.35 - dehydrogenase, ec:2.3.1.176 - C-acyltransferase, ec:1.3.1.3 - 5beta-reductase	2122	0.203666	0.141376	0.410414
Glycosaminoglycan degradation	1	map00531	ec:3.2.1.23 - lactase (ambiguous)	491	3	ec:3.2.1.31 - beta-glucuronide glucuronohydrolase glucuronidase, ec:3.2.1.23 - lactase (ambiguous), ec:3.2.1.52 - hexosaminidase	2122	0.203666	0.141376	0.410414
Valine, leucine and isoleucine biosynthesis	1	map00290	ec:4.2.1.9 - dehydratase	491	4	ec:2.2.1.6 - synthase, ec:4.3.1.19 - ammonia-lyase, ec:1.1.1.86 - reductoisomerase (NADP+), ec:4.2.1.9 - dehydratase	2122	0.203666	0.188501	0.420679
Glycosphingolipid biosynthesis - ganglio series	1	map00604	ec:3.2.1.23 - lactase (ambiguous)	491	4	ec:4.2.1.74 - hydratase, ec:1.1.1.35 - dehydrogenase, ec:4.2.1.17 - hydratase, ec:2.3.1.16 - C-acyltransferase	2122	0.203666	0.188501	0.420679
Phosphatidylinositol signaling system	1	map04070	ec:2.7.1.68 - 5-kinase	491	4	ec:3.1.4.11 - phospholipase C, ec:2.7.1.159 - 5/6-kinase, ec:2.7.1.68 - 5-kinase, ec:2.7.1.150 - 5-kinase	2122	0.203666	0.188501	0.420679
Isoquinoline alkaloid biosynthesis	1	map00950	ec:1.21.3.3 - oxidase	491	4	ec:2.6.1.1 - transaminase, ec:1.10.3.1 - oxidase, ec:1.4.3.21 - oxidase, ec:4.1.1.28 - decarboxylase	2122	0.203666	0.188501	0.420679
