# Supplementary material for: High variability of perezone content in rhizomes of Acourtia cordata wild plants, environmental factors related, and proteomic analysis
Source: PeerJ. 2023 Nov 15;11:e16136. doi: 10.7717/peerj.16136 (PMC10656900; doi:10.7717/peerj.16136)
Supplement: Supplemental Information 14 [file peerj-11-16136-s014.xlsx]

## Sheet: Hoja1
Supplementary Table S7. List of proteins involved in protein-protein interaction network for upregulated proteins.
Cluster	Size	Density	Internal weight	External weight	p-value	Members
1	14	0.2825	25.71	4.095	4.86136e-06	AT1G11660 FPS1 HSC70-1 P5CS2 AT5G47720 MFP2 AIM1 GAPC2 PKT4 PKT3 AT4G13010 ACAT2 AOR KAT5
2	7	0.7994	16.79	0.652	0.000706882	PHYA FUS5 COP8 COP13 FUS12 COP9 FUS6
3	8	0.3783	10.59	2.137	0.000966296	ESP3 At1g80070 MAC3A MAC3B CDC5 AT5G46840 MOS4 AT3G19810
4	5	0.6873	6.873	1.433	0.00609289	UPF3 DCP2 LBA1 DCP1 AT2G39260
5	3	0.3303	0.991	0.666	0.0404278	AT2G40770 AT1G30680 SRS2
6	2	0.976	0.976	0	0.0969654	VAM3 SGR4
7	2	0.401	0.401	0	0.0969654	AT3G13350 AT1G62660
8	2	0.396	0.396	0	0.0969654	ABCG15 ABCG40
9	2	0.363	0.363	0	0.0969654	AT5G23910 AT5G18590
10	2	0.417	0.417	0.188	0.110336	AT5G47540 PIRL4
11	4	0.3495	2.097	3.772	0.442275	ESP3 At1g80070 AT5G41140 AT3G19810
12	4	0.3175	1.905	7.018	0.557383	CSP3 emb1138 HSC70-1 P5CS2
